# Supplementary material for: Synthesis and DNA-binding affinity studies of glycosylated intercalators designed as functional mimics of the anthracycline antibiotics
Source: Royal Society of Chemistry journal article supplement (doi:10.1039/b909153j), 2009-01-01

**Supporting Information for:**

**Synthesis and DNA-Binding Affinity Studies of Novel**

**Aminosugar-Containing Compounds Designed as Functional**

**Mimics of Anthracycline Antibiotics**

*Wei Shi,<sup>†</sup> Robert S. Coleman,<sup>‡</sup> and Todd L. Lowary<sup>†,\*</sup>*

<sup>†</sup>Alberta Ingenuity Centre for Carbohydrate Science and Department of Chemistry, The University of Alberta, Gunning-Lemieux Chemistry Centre, Edmonton, AB T6G 2G2, Canada

and

<sup>‡</sup>Department of Chemistry, The Ohio State University, 100 West 18<sup>th</sup> Avenue, Columbus, OH 43210, USA

Email: tlowary@ualberta.ca

---

**Table of Contents**

|                                                                                     |          |
|-------------------------------------------------------------------------------------|----------|
| Synthetic procedure for compounds <b>15–16, 18–27, 29, 30, 33–37, 40, and 42–47</b> | S4 – S11 |
| <sup>1</sup> H NMR spectrum of <b>1</b>                                             | S20      |
| <sup>13</sup> C NMR spectrum (APT) of <b>1</b>                                      | S21      |
| <sup>1</sup> H NMR spectrum of <b>2</b>                                             | S22      |
| <sup>13</sup> C NMR spectrum (APT) of <b>2</b>                                      | S23      |
| <sup>1</sup> H NMR spectrum of <b>3</b>                                             | S24      |
| <sup>13</sup> C NMR spectrum (APT) of <b>3</b>                                      | S25      |
| <sup>1</sup> H NMR spectrum of <b>4</b>                                             | S26      |
| <sup>13</sup> C NMR spectrum (APT) of <b>4</b>                                      | S27      |
| <sup>1</sup> H NMR spectrum of <b>5</b>                                             | S28      |
| <sup>13</sup> C NMR spectrum (APT) of <b>5</b>                                      | S29      |

|                                                 |     |
|-------------------------------------------------|-----|
| <sup>1</sup> H NMR spectrum of <b>6</b>         | S30 |
| <sup>13</sup> C NMR spectrum (APT) of <b>6</b>  | S31 |
| <sup>1</sup> H NMR spectrum of <b>7</b>         | S32 |
| <sup>13</sup> C NMR spectrum (APT) of <b>7</b>  | S33 |
| <sup>1</sup> H NMR spectrum of <b>8</b>         | S34 |
| <sup>13</sup> C NMR spectrum (APT) of <b>8</b>  | S35 |
| <sup>1</sup> H NMR spectrum of <b>9</b>         | S36 |
| <sup>13</sup> C NMR spectrum (APT) of <b>9</b>  | S37 |
| <sup>1</sup> H NMR spectrum of <b>10</b>        | S38 |
| <sup>13</sup> C NMR spectrum (APT) of <b>10</b> | S39 |
| <sup>1</sup> H NMR spectrum of <b>11</b>        | S40 |
| <sup>13</sup> C NMR spectrum (APT) of <b>11</b> | S41 |
| <sup>1</sup> H NMR spectrum of <b>12</b>        | S42 |
| <sup>13</sup> C NMR spectrum (APT) of <b>12</b> | S43 |
| <sup>1</sup> H NMR spectrum of <b>16</b>        | S44 |
| <sup>13</sup> C NMR spectrum (APT) of <b>16</b> | S45 |
| <sup>1</sup> H NMR spectrum of <b>20</b>        | S46 |
| <sup>13</sup> C NMR spectrum (APT) of <b>20</b> | S47 |
| <sup>1</sup> H NMR spectrum of <b>21</b>        | S48 |
| <sup>13</sup> C NMR spectrum (APT) of <b>21</b> | S49 |
| <sup>1</sup> H NMR spectrum of <b>24</b>        | S50 |
| <sup>13</sup> C NMR spectrum (APT) of <b>24</b> | S51 |
| <sup>1</sup> H NMR spectrum of <b>25</b>        | S52 |
| <sup>13</sup> C NMR spectrum (APT) of <b>25</b> | S53 |
| <sup>1</sup> H NMR spectrum of <b>26</b>        | S54 |
| <sup>13</sup> C NMR spectrum (APT) of <b>26</b> | S55 |
| <sup>1</sup> H NMR spectrum of <b>27</b>        | S56 |
| <sup>13</sup> C NMR spectrum (APT) of <b>27</b> | S57 |
| <sup>1</sup> H NMR spectrum of <b>29</b>        | S58 |
| <sup>13</sup> C NMR spectrum (APT) of <b>29</b> | S59 |
| <sup>1</sup> H NMR spectrum of <b>30</b>        | S60 |
| <sup>13</sup> C NMR spectrum (APT) of <b>30</b> | S61 |
| <sup>1</sup> H NMR spectrum of <b>33</b>        | S62 |
| <sup>13</sup> C NMR spectrum (APT) of <b>33</b> | S63 |
| <sup>1</sup> H NMR spectrum of <b>34</b>        | S64 |

|                                                                    |     |
|--------------------------------------------------------------------|-----|
| <sup>13</sup> C NMR spectrum (APT) of <b>34</b>                    | S65 |
| <sup>1</sup> H NMR spectrum of <b>35</b>                           | S66 |
| <sup>13</sup> C NMR spectrum (APT) of <b>35</b>                    | S67 |
| <sup>1</sup> H NMR spectrum of <b>36</b>                           | S68 |
| <sup>13</sup> C NMR spectrum (APT) of <b>36</b>                    | S69 |
| <sup>1</sup> H NMR spectrum of <b>37</b>                           | S70 |
| <sup>13</sup> C NMR spectrum (APT) of <b>37</b>                    | S71 |
| <sup>1</sup> H NMR spectrum of <b>40<math>\alpha</math></b>        | S72 |
| <sup>13</sup> C NMR spectrum (APT) of <b>40<math>\alpha</math></b> | S73 |
| <sup>1</sup> H NMR spectrum of <b>40<math>\beta</math></b>         | S74 |
| <sup>13</sup> C NMR spectrum (APT) of <b>40<math>\beta</math></b>  | S75 |
| <sup>1</sup> H NMR spectrum of <b>42<math>\alpha</math></b>        | S76 |
| <sup>13</sup> C NMR spectrum (APT) of <b>42<math>\alpha</math></b> | S77 |
| <sup>1</sup> H NMR spectrum of <b>42<math>\beta</math></b>         | S78 |
| <sup>13</sup> C NMR spectrum (APT) of <b>42<math>\beta</math></b>  | S79 |
| <sup>1</sup> H NMR spectrum of <b>43<math>\alpha</math></b>        | S80 |
| <sup>13</sup> C NMR spectrum (APT) of <b>43<math>\alpha</math></b> | S81 |
| <sup>1</sup> H NMR spectrum of <b>43<math>\beta</math></b>         | S82 |
| <sup>13</sup> C NMR spectrum (APT) of <b>43<math>\beta</math></b>  | S83 |
| <sup>1</sup> H NMR spectrum of <b>44<math>\alpha</math></b>        | S84 |
| <sup>13</sup> C NMR spectrum (APT) of <b>44<math>\alpha</math></b> | S85 |
| <sup>1</sup> H NMR spectrum of <b>44<math>\beta</math></b>         | S86 |
| <sup>13</sup> C NMR spectrum (APT) of <b>44<math>\beta</math></b>  | S87 |
| <sup>1</sup> H NMR spectrum of <b>45</b>                           | S88 |
| <sup>13</sup> C NMR spectrum (APT) of <b>45</b>                    | S89 |
| <sup>1</sup> H NMR spectrum of <b>46</b>                           | S90 |
| <sup>13</sup> C NMR spectrum (APT) of <b>46</b>                    | S91 |
| <sup>1</sup> H NMR spectrum of <b>47</b>                           | S92 |
| <sup>13</sup> C NMR spectrum (APT) of <b>47</b>                    | S93 |
| HPLC apparatus                                                     | S94 |
| HPLC analysis of <b>1</b>                                          | S95 |
| HPLC analysis of <b>5</b>                                          | S96 |
| Sample figure from the FID assays of compound <b>1 – 4</b>         | S97 |

### 1-Tosyl-3-iodo-2-phenylindole (15)

To a solution of **19** (134 mg, 0.385 mmol) and  $K_2CO_3$  (160 mg, 1.16 mmol) in anhydrous MeCN (3.0 mL) was added  $I_2$  (0.3 g, 1.18 mmol). The reaction mixture was stirred at room temperature for about 12 h, and then the solution was diluted with EtOAc, washed with a satd aqueous solution of  $Na_2S_2O_3$  and then brine. The organic solution was dried ( $Na_2SO_4$ ), filtered, and concentrated to yield the crude product, which was purified by column chromatography (4:1, hexanes–EtOAc) to afford **15** (178 mg, 98%) as a white amorphous solid:  $R_f$  0.48 (4:1, hexanes–EtOAc);  $^1H$  NMR (400 MHz,  $CDCl_3$ ,  $\delta_H$ ) 8.33 (d, 1H,  $J = 8.0$  Hz, Ar), 7.31–7.55 (m, 10H, Ar), 7.10 (d, 2H,  $J = 8.6$  Hz, Ar), 2.33 (s, 3H,  $CH_3$ );  $^{13}C$  NMR (100 MHz,  $CDCl_3$ ,  $\delta_C$ ) 145.0 (Ar), 141.1 (Ar), 137.0 (Ar), 135.1 (Ar), 132.2 (Ar), 131.7 (2, Ar), 131.6 (Ar), 129.5 (2, Ar), 129.3 (Ar), 127.5 (2, Ar), 126.9 (2, Ar), 126.0 (Ar), 124.6 (Ar), 122.2 (Ar), 116.0 (Ar), 75.7 (Ar-I), 21.6 ( $CH_3$ ). HRMS (EI) calcd for  $C_{21}H_{16}INO_2S$ : 472.9947. Found: 472.9961. Anal. calcd for  $C_{21}H_{16}INO_2S$ : C, 53.29; H, 3.41; N, 2.96; S, 6.77. Found C, 53.38; H, 3.48; N, 3.05; S, 6.93.

### 3-Iodo-2-phenylindole (16)

To a solution of compound **15** (69 mg, 0.15 mmol) in THF (5.0 mL) was added a solution of tetra-*n*-butylammonium fluoride in THF (1.0 M, 1.0 mL, 1.0 mmol) at room temperature, and the mixture was heated at reflux for 6 h. After cooling to room temperature, a satd aqueous  $NaHCO_3$  solution (30 mL) was added, and the mixture was extracted with  $CH_2Cl_2$ . The organic layer was washed with brine, dried over  $Na_2SO_4$ , filtered, and concentrated to leave a residue, which was purified by column chromatography on silica gel (12:1 hexanes–EtOAc) to give the product **16** (40 mg, 86%) as a brownish oil:  $R_f$  0.55 (4:1 hexanes–EtOAc);  $^1H$  NMR (400 MHz,  $CDCl_3$ ,  $\delta_H$ ) 8.40 (br s, 1H, NH), 7.79 (d, 2H,  $J = 7.5$  Hz, Ar), 7.49–7.58 (m, 3H, Ar), 7.43–7.48 (m, 1H, Ar), 7.34–7.38 (m, 1H, Ar), 7.24–7.32 (m, 2H, Ar);  $^{13}C$  NMR (100 MHz,  $CDCl_3$ ,  $\delta_C$ ) 138.0 (Ar), 136.4 (Ar), 132.2 (Ar), 131.9 (Ar), 128.8 (2, Ar), 128.6 (Ar), 128.4 (2, Ar), 123.6 (Ar), 121.7 (Ar), 121.1 (Ar), 111.1 (Ar), 58.3 (Ar-I). HRMS (EI) calcd

for C<sub>14</sub>H<sub>10</sub>IN: 318.9858. Found: 318.9857. Anal. calcd for C<sub>14</sub>H<sub>10</sub>IN: C, 52.69; H, 3.16; N, 4.39. Found C, 52.59; H, 3.44; N, 4.38.

### ***o*-(Phenylethynyl)aniline (18)**

To a solution of Et<sub>3</sub>N (0.42 mL), PdCl<sub>2</sub>(PPh<sub>3</sub>)<sub>2</sub> (35 mg, 5 mol%), 2-iodoaniline **17** (220 mg, 1.00 mmol), and phenylacetylene (133 mg, 1.30 mmol) in THF (4 mL) was added CuI (10 mg, 5 mol%) under argon. The mixture was stirred at room temperature for 2 h, and then the reaction was quenched by the addition of a satd aqueous solution of NH<sub>4</sub>Cl (5 mL). The aqueous solution was then extracted with Et<sub>2</sub>O and the combined organic layers were washed with brine, dried (Na<sub>2</sub>SO<sub>4</sub>), filtered, and concentrated to yield the crude product, which was purified by column chromatography (10:1, hexanes–EtOAc) to obtain pure **18** as a yellow amorphous solid (185 mg, 95%): R<sub>f</sub> 0.48 (4:1, hexanes–EtOAc); <sup>1</sup>H NMR (400 MHz, CDCl<sub>3</sub>, δ<sub>H</sub>) 7.51–7.68 (m, 2H, Ar), 7.30–7.40 (m, 4H, Ar), 7.12–7.18 (m, 1H, Ar), 6.70–6.78 (m, 2H, Ar), 4.25 (br s, 2H, NH<sub>2</sub>); <sup>13</sup>C NMR (100 MHz, CDCl<sub>3</sub>, δ<sub>C</sub>) 147.7 (Ar), 132.2 (Ar), 131.5 (2, Ar), 129.7 (Ar), 128.4 (2, Ar), 128.2 (Ar), 123.3 (Ar), 118.0 (Ar), 114.4 (Ar), 108.0 (Ar), 94.7 (≡C), 85.9 (≡C). HRMS (EI) calcd for C<sub>14</sub>H<sub>11</sub>N: 193.0891. Found: 193.0893.

### ***N*-[2-(Phenylethynyl)phenyl]-*p*-toluenesulfonamide (19)**

Compound **18** (78 mg, 0.40 mmol) was dissolved in pyridine–THF (0.22 mL:1 mL), and *p*-toluenesulfonyl chloride (115 mg, 0.62 mmol) was added. The mixture was stirred for 24 h at room temperature. The reaction was then diluted with water, extracted with CH<sub>2</sub>Cl<sub>2</sub>, dried (Na<sub>2</sub>SO<sub>4</sub>), and filtered. After evaporation, the residue was purified by column chromatography (8:1, hexanes–EtOAc) to obtain pure **19** as a white waxy solid (134 mg, 96%): R<sub>f</sub> 0.40 (6:1, hexanes–EtOAc); <sup>1</sup>H NMR (400 MHz, CDCl<sub>3</sub>, δ<sub>H</sub>) 7.69 (d, 2H, *J* = 8.3 Hz, Ar), 7.64 (d, 1H, *J* = 8.3 Hz, Ar), 7.46–7.51 (m, 2H, Ar), 7.35–7.42 (m, 4H, Ar), 7.26–7.32 (m, 2H, Ar), 7.16 (d, 2H, *J* = 8.0 Hz, Ar), 7.04–7.09 (td, 1H, *J* = 7.6, 1.0 Hz, Ar), 2.33 (s, 3H, CH<sub>3</sub>); <sup>13</sup>C NMR (100 MHz, CDCl<sub>3</sub>, δ<sub>C</sub>) 144.0 (Ar), 137.6 (Ar), 136.1 (Ar), 132.0 (Ar), 131.6 (2, Ar), 129.6 (3, Ar), 129.1 (Ar), 128.6 (2, Ar), 127.3 (2, Ar), 124.7 (Ar), 122.0

(Ar), 120.5 (Ar), 114.7 (Ar), 96.2 ( $\equiv\text{C}$ ), 83.8 ( $\equiv\text{C}$ ), 21.5 ( $\text{CH}_3$ ). HRMS (EI) calcd for  $\text{C}_{21}\text{H}_{17}\text{NO}_2\text{S}$ : 347.0980. Found: 347.0980.

### 2-Phenylbenzo[*b*]furan (20)

*n*-Butyllithium (1.6 M in hexane, 0.5 mL, 0.80 mmol) was added dropwise to a solution of 3-iodo-2-phenylbenzo[*b*]furan **13** (33 mg, 0.11 mmol) in THF (3.0 mL) at -78 °C. The mixture was stirred at -78 °C for 5 min and a satd aqueous solution of  $\text{NH}_4\text{Cl}$  (2 mL) was then added. After stirring for another 1 min, the reaction mixture was extracted with EtOAc. The organic layer was washed with brine, dried ( $\text{Na}_2\text{SO}_4$ ), filtered, and concentrated to yield the crude product, which was purified by column chromatography (hexanes) to afford **20** (17 mg, 86%) as a white flaky solid:  $R_f$  0.31 (hexanes);  $^1\text{H}$  NMR (400 MHz,  $\text{CDCl}_3$ ,  $\delta_{\text{H}}$ ) 7.87–7.92 (m, 2H, Ar), 7.59–7.62 (m, 1H, Ar), 7.53–7.57 (m, 1H, Ar), 7.44–7.50 (m, 2H, Ar), 7.35–7.40 (m, 1H, Ar), 7.28–7.33 (m, 1H, Ar), 7.23–7.28 (m, 1H, Ar), 7.04 (br s, 1H, Ar);  $^{13}\text{C}$  NMR (100 MHz,  $\text{CDCl}_3$ ,  $\delta_{\text{C}}$ ) 155.9 (Ar), 154.9 (Ar), 130.5 (Ar), 129.2 (Ar), 128.8 (2, Ar), 128.5 (Ar), 125.0 (2, Ar), 124.3 (Ar), 122.9 (Ar), 120.9 (Ar), 111.2 (Ar), 101.3 (Ar). HRMS (EI) calcd for  $\text{C}_{14}\text{H}_{10}\text{O}$ : 194.0732. Found: 194.0731. Anal. calcd for  $\text{C}_{14}\text{H}_{10}\text{O}$ : C, 86.57; H, 5.19. Found C, 86.59; H, 5.33.

### 2-Phenylbenzo[*b*]thiophene (21)

This compound was synthesized as a white flaky solid from **14** in 85% yield by following the same procedure used for the synthesis of **21**:  $R_f$  0.39 (hexanes);  $^1\text{H}$  NMR (400 MHz,  $\text{CDCl}_3$ ,  $\delta_{\text{H}}$ ) 7.84–7.87 (m, 1H, Ar), 7.78–7.81 (m, 1H, Ar), 7.72–7.76 (m, 2H, Ar), 7.56 (br s, 1H, Ar), 7.42–7.47 (m, 2H, Ar), 7.31–7.39 (m, 3H, Ar);  $^{13}\text{C}$  NMR (100 MHz,  $\text{CDCl}_3$ ,  $\delta_{\text{C}}$ ) 144.3 (Ar), 140.7 (Ar), 139.5 (Ar), 134.3 (Ar), 129.0 (2, Ar), 128.3 (Ar), 126.5 (2, Ar), 124.5 (Ar), 124.3 (Ar), 123.6 (Ar), 122.3 (Ar), 119.5 (Ar). HRMS (EI) calcd for  $\text{C}_{14}\text{H}_{10}\text{S}$ : 210.0503. Found: 210.0504. Anal. calcd for  $\text{C}_{14}\text{H}_{10}\text{S}$ : C, 79.96; H, 4.79; S, 15.25. Found C, 80.15; H, 4.91; S, 15.44.

### 1-Tosyl-2-phenylindole (22)

Compound **19** (39 mg, 0.11 mmol) was dissolved in dichloroethane (7 mL), and copper(II) triflate (12 mg, 0.035 mmol) was added. The mixture was heated at reflux for 48 h. After evaporation, the residue was purified by column chromatography (30:1, hexanes–EtOAc) to obtain pure **22** as a white waxy solid (20 mg, 52%):  $R_f$  0.21 (20:1, hexanes–EtOAc);  $^1\text{H NMR}$  (400 MHz,  $\text{CDCl}_3$ ,  $\delta_{\text{H}}$ ) 8.30–8.34 (m, 1H, Ar), 7.48–7.54 (m, 2H, Ar), 7.40–7.46 (m, 4H, Ar), 7.36–7.39 (m, 1H, Ar), 7.25–7.30 (m, 3H, Ar), 7.04 (d, 2H,  $J = 8.6$  Hz, Ar), 6.55 (s, 1H, Ar), 2.33 (s, 3H,  $\text{CH}_3$ );  $^{13}\text{C NMR}$  (100 MHz,  $\text{CDCl}_3$ ,  $\delta_{\text{C}}$ ) 144.5 (Ar), 142.1 (Ar), 138.3 (Ar), 134.7 (Ar), 132.4 (Ar), 130.5 (Ar), 131.6 (Ar), 130.3 (2, Ar), 129.2 (2, Ar), 128.6 (Ar), 127.5 (2, Ar), 126.8 (2, Ar), 124.8 (Ar), 124.3 (Ar), 120.7 (Ar), 116.7 (Ar), 113.6 (Ar), 21.6 ( $\text{CH}_3$ ). HRMS (EI) calcd for  $\text{C}_{21}\text{H}_{17}\text{NO}_2\text{S}$ : 347.0980. Found: 347.0981. Anal. calcd for  $\text{C}_{21}\text{H}_{17}\text{NO}_2\text{S}$ : C, 72.60; H, 4.93; N, 4.03; S, 9.23. Found C, 72.58; H, 5.17; N, 3.76; S, 9.25.

### 2-Phenylindole (23)

This compound was synthesized as an amorphous off-white solid from **15** in 74% yield by following the same procedure used for the synthesis of **20**:  $R_f$  0.57 (4:1 hexanes–EtOAc);  $^1\text{H NMR}$  (400 MHz,  $\text{CDCl}_3$ ,  $\delta_{\text{H}}$ ) 8.32 (br s, 1H, NH), 7.65–7.70 (m, 3H, Ar), 7.44–7.49 (m, 2H, Ar), 7.40–7.5243 (m, 1H, Ar), 7.33–7.37 (m, 1H, Ar), 7.20–7.24 (m, 1H, Ar), 7.14–7.18 (m, 1H, Ar), 6.85 (s, 1H, Ar);  $^{13}\text{C NMR}$  (100 MHz,  $\text{CDCl}_3$ ,  $\delta_{\text{C}}$ ) 137.9 (Ar), 136.9 (Ar), 132.4 (Ar), 129.3 (Ar), 129.0 (2, Ar), 127.7 (Ar), 125.2 (2, Ar), 122.4 (Ar), 120.7 (Ar), 120.3 (Ar), 110.9 (Ar), 100.0 (Ar). HRMS (EI) calcd for  $\text{C}_{14}\text{H}_{11}\text{N}$ : 193.0891. Found: 193.0892. Anal. calcd for  $\text{C}_{14}\text{H}_{11}\text{N}$ : C, 87.01; H, 5.74; N, 7.25. Found C, 87.27; H, 5.79; N, 7.33.

### 3-(2-Phenylbenzofuran-3-yl)-prop-2-yn-1-ol (24)

To a solution of piperidine (3 mL),  $\text{PdCl}_2(\text{PPh}_3)_2$  (2 mg, 5 mol%), **13** (21 mg, 0.064 mmol), and propargyl alcohol (5 mg, 0.1 mmol) was added CuI (1 mg, 10 mol%). The mixture was stirred at room temperature for 5 h. The reaction was then quenched by the addition of a satd aqueous  $\text{NH}_4\text{Cl}$  solution

and the resulting solution was extracted with Et<sub>2</sub>O. The organic fractions were dried (Na<sub>2</sub>SO<sub>4</sub>), filtered, and concentrated under vacuum to yield the crude product, which was purified by column chromatography (6:1 hexanes–EtOAc) to afford **24** (12 mg, 73%) as a brownish amorphous solid: *R<sub>f</sub>* 0.29 (4:1 hexanes–EtOAc); <sup>1</sup>H NMR (400 MHz, CDCl<sub>3</sub>, δ<sub>H</sub>) 8.24–8.28 (m, 2H, Ar), 7.66–7.69 (m, 1H, Ar), 7.46–7.52 (m, 3H, Ar), 7.38–7.43 (m, 1H, Ar), 7.28–7.36 (m, 2H, Ar), 4.70 (s, 2H, OCH<sub>2</sub>), 2.15 (br s, 1H, OH); <sup>13</sup>C NMR (100 MHz, CDCl<sub>3</sub>, δ<sub>C</sub>) 156.7 (Ar), 153.4 (Ar), 130.0 (2, Ar), 129.3 (Ar), 128.7 (2, Ar), 126.0 (2, Ar), 125.4 (Ar), 123.4 (Ar), 120.2 (Ar), 111.2 (Ar), 98.4 (Ar), 94.8 (≡C), 77.6 (≡C), 52.0 (OCH<sub>2</sub>). HRMS (EI) calcd for C<sub>17</sub>H<sub>12</sub>O<sub>2</sub>: 248.0837. Found: 248.0838. Anal. calcd for C<sub>17</sub>H<sub>12</sub>O<sub>2</sub>: C, 82.24; H, 4.87. Found C, 82.05; H, 4.86.

### **3-(2-Phenylbenzothiophen-3-yl)-prop-2-yn-1-ol (25)**

To a solution of piperidine (4 mL), PdCl<sub>2</sub>(PPh<sub>3</sub>)<sub>2</sub> (28 mg, 5 mol%), **14** (254 mg, 0.759 mmol), and propargyl alcohol (64 mg, 1.1 mmol) was added CuI (15 mg, 10 mol%). The mixture was stirred at room temperature for 12 h and the reaction was then quenched by the addition of a satd aqueous NH<sub>4</sub>Cl solution, and the resulting solution was extracted with Et<sub>2</sub>O. The organic fractions were dried (Na<sub>2</sub>SO<sub>4</sub>), filtered, and concentrated under vacuum to yield the crude product, which was purified by column chromatography (6:1 hexanes–EtOAc) to afford **25** (162 mg, 81%) as a off-white amorphous solid: *R<sub>f</sub>* 0.56 (2:1 hexanes–EtOAc); <sup>1</sup>H NMR (400 MHz, CDCl<sub>3</sub>, δ<sub>H</sub>) 7.92–8.02 (m, 3H, Ar), 7.78–7.84 (m, 1H, Ar), 7.36–7.52 (m, 5H, Ar), 4.62 (s, 2H, OCH<sub>2</sub>), 1.82 (br s, 1H, OH); <sup>13</sup>C NMR (100 MHz, CDCl<sub>3</sub>, δ<sub>C</sub>) 147.0 (Ar), 141.1 (Ar), 137.5 (Ar), 133.6 (Ar), 128.8 (Ar), 128.7 (2, Ar), 128.4 (2, Ar), 125.3 (Ar), 125.0 (Ar), 123.2 (Ar), 122.0 (Ar), 112.8 (Ar), 92.4 (≡C), 80.2 (≡C), 51.9 (OCH<sub>2</sub>). HRMS (EI) calcd for C<sub>17</sub>H<sub>12</sub>OS: 264.0609. Found: 264.0610. Anal. calcd for C<sub>17</sub>H<sub>12</sub>OS: C, 77.24; H, 4.58; S, 12.13. Found C, 77.15; H, 4.68; S, 12.17.



### **3-(1-Tosyl-2-phenylindol-3-yl)-prop-2-yn-1-ol (26)**

To a solution of piperidine (0.75 mL), DMF (0.25 mL), PdCl<sub>2</sub>(PPh<sub>3</sub>)<sub>2</sub> (11 mg, 20 mol%), **15** (38 mg, 0.079 mmol), and propargyl alcohol (7 mg, 0.1 mmol) was added CuI (2 mg, 10 mol%). The mixture was stirred at 100 °C in a microwave reactor for 2 h, the reaction was then quenched by the addition of a satd aqueous NH<sub>4</sub>Cl solution, and the resulting solution was extracted with Et<sub>2</sub>O. The organic fractions were dried (Na<sub>2</sub>SO<sub>4</sub>), filtered, and concentrated under vacuum to yield the crude product, which was purified by column chromatography (3:1 hexanes–EtOAc) to afford **26** (17 mg, 52%) as a brownish oil: R<sub>f</sub> 0.34 (2:1 hexanes–EtOAc); <sup>1</sup>H NMR (400 MHz, CDCl<sub>3</sub>, δ<sub>H</sub>) 8.30–8.33 (m, 1H, Ar), 7.52–7.60 (m, 3H, Ar), 7.38–7.48 (m, 4H, Ar), 7.31–7.36 (m, 1H, Ar), 7.23–7.27 (m, 2H, Ar), 7.03–7.07 (m, 2H, Ar), 4.40 (s, 2H, OCH<sub>2</sub>), 2.32 (s, 3H, CH<sub>3</sub>); <sup>13</sup>C NMR (100 MHz, CDCl<sub>3</sub>, δ<sub>C</sub>) 144.9 (Ar), 143.8 (Ar), 137.0 (Ar), 134.6 (Ar), 131.1 (2, Ar), 130.7 (Ar), 130.5 (Ar), 129.4 (2, Ar), 129.2 (Ar), 127.4 (2, Ar), 126.8 (2, Ar), 125.8 (Ar), 124.7 (Ar), 120.0 (Ar), 116.5 (Ar), 107.3 (Ar), 92.6 (≡C), 77.6 (≡C), 51.7 (OCH<sub>2</sub>), 21.5 (CH<sub>3</sub>). HRMS (EI) calcd for C<sub>24</sub>H<sub>19</sub>O<sub>3</sub>NS: 401.1086. Found: 401.1083. Purity: > 99%.

### **3-(2-Phenylindol-3-yl)-prop-2-yn-1-ol (27)**

This compound was synthesized as a brown oil from **26** in 45% yield by following the same procedure used for the synthesis of **16**: R<sub>f</sub> 0.30 (5:1 toluene–EtOAc); <sup>1</sup>H NMR (400 MHz, CDCl<sub>3</sub>, δ<sub>H</sub>) 8.43 (br s, 1H, NH), 7.96–7.98 (m, 2H, Ar), 7.74–7.76 (m, 1H, Ar), 7.48–7.52 (m, 2H, Ar), 7.38–7.42 (m, 2H, Ar), 7.24–7.28 (m, 1H, Ar), 7.20–7.23 (m, 1H, Ar), 4.62 (s, 2H, OCH<sub>2</sub>); <sup>13</sup>C NMR (100 MHz, CDCl<sub>3</sub>, δ<sub>C</sub>) 140.3 (Ar), 135.7 (Ar), 131.8 (Ar), 130.8 (Ar), 129.4 (2, Ar), 128.9 (Ar), 126.9 (2, Ar), 123.9 (Ar), 121.4 (Ar), 120.0 (Ar), 111.5 (Ar), 92.2 (Ar), 80.0 (≡C), 66.6 (≡C), 52.3 (OCH<sub>2</sub>). HRMS (EI) calcd for C<sub>17</sub>H<sub>13</sub>NO: 249.0997. Found: 247.0998.

**2-Propargyl 4-O-acetyl-3-azido-2,3,6-trideoxy- $\alpha$ -L-arabino-hexopyranoside (29)** and **2-Propargyl 4-O-acetyl-3-azido-2,3,6-trideoxy- $\alpha$ -L-ribo-hexopyranoside (30)**

Compound **28** (3.9g, 15 mmol), crushed activated 4Å molecular sieves (500 mg) and propargyl alcohol (1.7 g, 30 mmol) were suspended in anhydrous CH<sub>2</sub>Cl<sub>2</sub> (60 mL). The mixture was stirred for 5–10 min at room temperature and then cooled to -10 °C. BF<sub>3</sub>•Et<sub>2</sub>O (3.91 mL, 30.8 mmol) was added dropwise via syringe. After adding BF<sub>3</sub>•Et<sub>2</sub>O, the reaction mixture was warmed to 0 °C. Once the starting material was fully consumed (within 0.5 h), the reaction mixture was quenched by the addition of K<sub>2</sub>CO<sub>3</sub> (3.33 g), and then H<sub>2</sub>O (120 mL), satd NaHCO<sub>3</sub> solution (120 mL) and CH<sub>2</sub>Cl<sub>2</sub> (250 mL) were added. The organic layer was separated, washed with brine, and was dried (Na<sub>2</sub>SO<sub>4</sub>), filtered and concentrated. The crude product was purified by column chromatography (15:1 → 8:1, hexanes–EtOAc) to give pure **29** (2.11 g, 55%) and **30** (0.172 g, 4.5%) as colorless oils. In addition, a mixture of the two β isomers (**31** and **32**) and some **30** was collected as clear oil (0.98 g, 25%). (**29**): R<sub>f</sub> 0.32 (8:1 hexanes–EtOAc); IR: ν 3281 (≡C–H), 2103 (N=N=N), 1744 (C=O) cm<sup>-1</sup>; [α]<sub>D</sub><sup>23</sup> –189.0 (c 4.9, CH<sub>2</sub>Cl<sub>2</sub>); <sup>1</sup>H NMR (400 MHz, CDCl<sub>3</sub>, δ<sub>H</sub>) 5.02 (br d, 1H, J<sub>1,2a</sub> = 3.4 Hz, H-1), 4.66 (dd, 1H, J<sub>3,4</sub> = J<sub>4,5</sub> = 9.8 Hz, H-4), 4.21 (dd, 1H, J = 15.7 Hz, J = 2.4 Hz, OCH<sub>2</sub>C≡CH), 4.16 (dd, 1H, J = 15.7 Hz, J = 2.4 Hz, OCH<sub>2</sub>C≡CH), 3.86 (ddd, 1H, J<sub>2a,3</sub> = 12.4 Hz, J<sub>3,4</sub> = 9.8 Hz, J<sub>2e,3</sub> = 5.0 Hz, H-3), 3.80 (dq, 1H, J<sub>4,5</sub> = 9.8 Hz, J<sub>5,6</sub> = 6.3 Hz, H-5), 2.44 (t, 1H, J = 2.4 Hz, OCH<sub>2</sub>C≡CH), 2.18 (ddd, 1H, J<sub>2a,2e</sub> = 13.3 Hz, J<sub>2e,3</sub> = 5.0 Hz, J<sub>1,2e</sub> = 1.1 Hz, H-2e), 2.11 (s, 3H, O=CCH<sub>3</sub>), 1.75 (ddd, 1H, J<sub>2a,2e</sub> = 13.3 Hz, J<sub>2a,3</sub> = 12.4 Hz, J<sub>1,2a</sub> = 3.4 Hz, H-2a), 1.15 (d, 3H, J<sub>5,6</sub> = 6.3 Hz, H-6); <sup>13</sup>C NMR (100 MHz, CDCl<sub>3</sub>, δ<sub>C</sub>) 170.0 (C=O), 95.1 (C-1), 78.9 (C≡CH), 75.3 (C-4), 74.6 (C≡CH), 66.4 (C-5), 57.5 (C-3), 54.3 (OCH<sub>2</sub>), 34.9 (C-2), 20.8 (O=CCH<sub>3</sub>), 17.3 (C-6). HRMS (ESI) calcd for (M+Na) C<sub>11</sub>H<sub>15</sub>N<sub>3</sub>O<sub>4</sub>Na: 276.0955. Found: 276.0955. Anal. calcd for C<sub>11</sub>H<sub>15</sub>N<sub>3</sub>O<sub>4</sub>: C, 52.17; H, 5.97; N, 16.59. Found C, 52.40; H, 5.85; N, 16.50.

(**30**): R<sub>f</sub> 0.44 (4:1 hexanes:EtOAc); <sup>1</sup>H NMR (400 MHz, CDCl<sub>3</sub>, δ<sub>H</sub>) 5.01 (dd, 1H, J<sub>1,2a</sub> = 4.0 Hz, J<sub>1,2e</sub> = 1.5 Hz, H-1), 4.67 (dd, 1H, J<sub>4,5</sub> = 9.6 Hz, J<sub>3,4</sub> = 3.6 Hz, H-4), 4.25 (d, 2H, J = 2.4 Hz, OCH<sub>2</sub>C≡CH), 4.20 (dq, 1H, J<sub>4,5</sub> = 9.6 Hz, J<sub>5,6</sub> = 6.3 Hz, H-5), 4.11 (ddd, 1H, J<sub>3,4</sub> = J<sub>2a,3</sub> = J<sub>2e,3</sub> = 3.6 Hz, H-3), 2.42 (t, 1H, J = 2.4 Hz, OCH<sub>2</sub>C≡CH), 2.00–2.15 (m, 5H, O=CCH<sub>3</sub>, H-2a, H-2e), 1.18 (d, 3H, J<sub>5,6</sub> = 6.3 Hz, H-6); <sup>13</sup>C NMR (100 MHz, CDCl<sub>3</sub>, δ<sub>C</sub>) 170.1 (C=O), 93.8 (C-1), 79.1 (C≡CH), 74.5 (C≡CH), 73.9 (C-4),

62.2 (C-5), 55.7 (C-3), 54.5 (OCH<sub>2</sub>), 32.8 (C-2), 20.7 (O=CCH<sub>3</sub>), 17.2 (C-6). HRMS (ESI) calcd for (M+Na) C<sub>11</sub>H<sub>15</sub>N<sub>3</sub>O<sub>4</sub>Na: 276.0955. Found: 276.0953.

### 2-Propargyl 3-azido-2,3,6-trideoxy- $\alpha$ -L-arabino-hexopyranoside (33)

Compound **29** (1.52 g, 6.01 mmol) was dissolved in CH<sub>3</sub>OH (70 mL). To this solution was added K<sub>2</sub>CO<sub>3</sub> (0.36 g, 2.6 mmol), and then the reaction mixture was stirred for 12 h. The solvent was evaporated and the residue was suspended in water (100 mL), extracted with CH<sub>2</sub>Cl<sub>2</sub>, washed with brine, and dried over Na<sub>2</sub>SO<sub>4</sub>. After filtration, the filtrate was concentrated and the resulting residue was purified by column chromatography (4:1 hexanes–EtOAc) to acquire pure **33** as a colorless oil (1.27 g, 99%); R<sub>f</sub> 0.44 (4:1 hexanes–EtOAc); IR  $\nu$  3425 (O–H), 3293 ( $\equiv$ C–H), 2104 (N=N=N) cm<sup>-1</sup>;  $[\alpha]_D^{23}$  –160.0 (*c* 3.6, CH<sub>2</sub>Cl<sub>2</sub>); <sup>1</sup>H NMR (400 MHz, CDCl<sub>3</sub>,  $\delta_H$ ) 5.02 (br d, 1H, *J*<sub>1,2a</sub> = 3.4 Hz, H-1), 4.22 (dd, 1H, *J* = 15.7 Hz, *J* = 2.4 Hz, OCH<sub>2</sub>C $\equiv$ CH), 4.17 (dd, 1H, *J* = 15.7 Hz, *J* = 2.4 Hz, OCH<sub>2</sub>C $\equiv$ CH), 3.76 (ddd, 1H, *J*<sub>2a,3</sub> = 12.3 Hz, *J*<sub>3,4</sub> = 9.5 Hz, *J*<sub>2e,3</sub> = 5.0 Hz, H-3), 3.69 (dq, 1H, *J*<sub>4,5</sub> = 9.5 Hz, *J*<sub>5,6</sub> = 6.2 Hz, H-5), 3.14 (dd, 1H, *J*<sub>3,4</sub> = *J*<sub>4,5</sub> = 9.5 Hz, H-4), 2.44 (t, 1H, *J* = 2.4 Hz, OCH<sub>2</sub>C $\equiv$ CH), 2.41 (br s, 1H, OH), 2.19 (ddd, 1H, *J*<sub>2a,2e</sub> = 13.2 Hz, *J*<sub>2e,3</sub> = 5.0 Hz, *J*<sub>1,2e</sub> = 1.2 Hz, H-2e), 1.74 (ddd, 1H, *J*<sub>2a,2e</sub> = 13.2 Hz, *J*<sub>2a,3</sub> = 12.3 Hz, *J*<sub>1,2a</sub> = 3.4 Hz, H-2a), 1.29 (d, 3H, *J*<sub>5,6</sub> = 6.2 Hz, H-6); <sup>13</sup>C NMR (100 MHz, CDCl<sub>3</sub>,  $\delta_C$ ) 95.1 (C-1), 79.0 (C $\equiv$ CH), 75.8 (C-4), 74.6 (C $\equiv$ CH), 68.2 (C-5), 60.2 (C-3), 54.2 (OCH<sub>2</sub>), 34.7 (C-2), 17.6 (C-6). HRMS (EI) calcd for C<sub>9</sub>H<sub>13</sub>N<sub>3</sub>O<sub>3</sub>: 211.0957. Found: 211.0960. Anal. calcd for C<sub>9</sub>H<sub>13</sub>N<sub>3</sub>O<sub>3</sub>: C, 51.18; H, 6.20; N, 19.89. Found C, 51.22; H, 6.13; N, 19.77.

### 2-Propargyl 4-O-acetyl-3-azido-2,3,6-trideoxy- $\alpha$ -L-lyxo-hexopyranoside (34)

To a solution of compound **33** (128 mg, 0.611 mmol) in 19:1 CH<sub>2</sub>Cl<sub>2</sub>–pyridine (16.8 mL) at -15 °C was added the solution of Tf<sub>2</sub>O (triflic anhydride) (0.438 mL, 2.58 mmol) in CH<sub>2</sub>Cl<sub>2</sub> (3.4 mL). After stirring for 45 min while keeping the temperature below -5 °C, TLC showed the starting material was gone and a new spot (R<sub>f</sub> 0.61, 4:1 hexanes–EtOAc) appeared. The reaction mixture was then extracted with ice-cold 1M HCl aqueous solution and water, dried with Na<sub>2</sub>SO<sub>4</sub>, filtered, and concentrated to yield an

orange liquid. The product was immediately dissolved in dry CH<sub>3</sub>CN (10 mL) and *n*-Bu<sub>4</sub>NOAc (366 mg, 1.22 mmol) was added. After stirring at 40 °C for 40 min, the solvent was removed under vacuum. The residue was purified by column chromatography (4:1 hexanes–EtOAc) to yield pure **34** (132 mg, 86%) as a pale yellow oil. R<sub>f</sub> 0.39 (4:1 hexanes–EtOAc); IR ν 3279 (≡C–H), 2104 (N=N=N), 1744 (C=O) cm<sup>-1</sup>; [α]<sub>D</sub><sup>23</sup> –161.4 (*c* 4.4, CH<sub>2</sub>Cl<sub>2</sub>); <sup>1</sup>H NMR (500 MHz, CD<sub>3</sub>OD, δ<sub>H</sub>) 5.16 (br s, 2H, H-1, H-4), 4.22 (2 d, 2H, *J* = 2.4 Hz, OCH<sub>2</sub>C≡CH), 4.02 (br q, 1H, *J*<sub>5,6</sub> = 6.5 Hz, H-5), 3.86 (ddd, 1H, *J*<sub>2a,3</sub> = 12.8 Hz, *J*<sub>2e,3</sub> = 4.8 Hz, *J*<sub>3,4</sub> = 3.0 Hz, H-3), 2.45 (t, 1H, *J* = 2.4 Hz, OCH<sub>2</sub>C≡CH), 2.18 (s, 3H, O=CCH<sub>3</sub>), 2.10 (ddd, 1H, *J*<sub>2a,2e</sub> = *J*<sub>2a,3</sub> = 12.8 Hz, *J*<sub>1,2a</sub> = 3.3 Hz, H-2a), 1.56 (br dd, 1H, *J*<sub>2a,2e</sub> = 12.8 Hz, *J*<sub>2e,3</sub> = 4.8 Hz, H-2e), 1.14 (d, 3H, *J*<sub>5,6</sub> = 6.5 Hz, H-6); <sup>13</sup>C NMR (100 MHz, CDCl<sub>3</sub>, δ<sub>C</sub>) 170.4 (C=O), 95.8 (C-1), 79.0 (C≡CH), 74.6 (C≡CH), 70.0 (C-4), 65.6 (C-5), 54.5 (OCH<sub>2</sub>), 54.4 (C-3), 29.2 (C-2), 20.7 (O=CCH<sub>3</sub>), 16.6 (C-6). HRMS (ESI) calcd for (M+Na) C<sub>11</sub>H<sub>15</sub>N<sub>3</sub>O<sub>4</sub>Na: 276.0955. Found: 276.0956. Anal. calcd for C<sub>11</sub>H<sub>15</sub>N<sub>3</sub>O<sub>4</sub>: C, 52.17; H, 5.97; N, 16.59. Found C, 52.53; H, 5.99; N, 16.93.

### 2-Propargyl 3-azido-2,3,6-trideoxy-α-L-lyxo-hexopyranoside (35)

Compound **34** (81 mg, 0.32 mmol) was dissolved in CH<sub>3</sub>OH (6 mL), K<sub>2</sub>CO<sub>3</sub> (31 mg, 0.23 mmol) added and then the reaction mixture was stirred for 24 h. The solvent was evaporated and the residue was purified by column chromatography (3:1 hexanes–EtOAc) to acquire pure **35** as a pale yellow thin oil (64 mg, 94%); R<sub>f</sub> 0.26 (3:1 hexanes–EtOAc); IR ν 3462 (O–H), 3294 (≡C–H), 2100 (N=N=N) cm<sup>-1</sup>; [α]<sub>D</sub><sup>23</sup> –169.7 (*c* 2.3, CH<sub>2</sub>Cl<sub>2</sub>); <sup>1</sup>H NMR (500 MHz, CDCl<sub>3</sub>, δ<sub>H</sub>) 5.10 (br d, 1H, *J*<sub>1,2a</sub> = 3.8 Hz, H-1), 4.19 (s, 2H, OCH<sub>2</sub>C≡CH), 3.92 (br q, 1H, *J*<sub>5,6</sub> = 6.5 Hz, H-5), 3.79 (ddd, 1H, *J*<sub>2a,3</sub> = 13.0 Hz, *J*<sub>2e,3</sub> = 5.0 Hz, *J*<sub>3,4</sub> = 2.8 Hz, H-3), 3.68 (br s, 1H, H-4), 2.44 (t, 1H, *J* = 2.4 Hz, OCH<sub>2</sub>C≡CH), 2.09 (ddd, 1H, *J*<sub>2a,2e</sub> = *J*<sub>2a,3</sub> = 13.0 Hz, *J*<sub>1,2a</sub> = 3.8 Hz, H-2a), 2.01 (br s, 1H, OH), 1.93 (br dd, 1H, *J*<sub>2a,2e</sub> = 13.0 Hz, *J*<sub>2e,3</sub> = 5.0 Hz, H-2e), 1.26 (d, 3H, *J*<sub>5,6</sub> = 6.5 Hz, H-6); <sup>13</sup>C NMR (125 MHz, CDCl<sub>3</sub>, δ<sub>C</sub>) 95.8 (C-1), 79.1 (C≡CH), 74.5 (C≡CH), 69.6 (C-4), 66.4 (C-5), 56.8 (C-3), 54.5 (OCH<sub>2</sub>), 28.3 (C-2), 16.6 (C-6). HRMS (ESI) calcd for (M+Na) C<sub>9</sub>H<sub>13</sub>N<sub>3</sub>O<sub>3</sub>Na: 234.0849. Found: 234.0848. Anal. calcd for C<sub>9</sub>H<sub>13</sub>N<sub>3</sub>O<sub>3</sub>: C, 51.18; H, 6.20; N, 19.89. Found C, 50.75; H, 6.30; N, 19.19.

### 2-Propargyl 3-amino-2,3,6-trideoxy- $\alpha$ -L-lyxo-hexopyranoside (36)

To a solution of compound **35** (458 mg, 2.17 mmol) in THF (50 mL) and H<sub>2</sub>O (2 mL) was added PPh<sub>3</sub> (1.14 g, 4.35 mmol), and the reaction was heated at reflux for 10 h. After cooling and concentration of the solution, the residue was purified by column chromatography on Iatrobeds (EtOAc  $\rightarrow$  CH<sub>3</sub>OH) to yield pure **36** (356 mg, 89%) as a white waxy solid: R<sub>f</sub> 0.55 (100:1 CH<sub>3</sub>OH–HOAc); IR  $\nu$  3287.4 ( $\equiv$ C–H, O–H) cm<sup>-1</sup>; [ $\alpha$ ]<sub>D</sub><sup>23</sup> –191.8 (*c* 1.9, CH<sub>3</sub>OH); <sup>1</sup>H NMR (500 MHz, CD<sub>3</sub>OD,  $\delta$ <sub>H</sub>) 5.00 (br d, 1H, *J*<sub>1,2a</sub> = 3.4 Hz, H-1), 4.18 (d, 2H, *J* = 2.5 Hz, OCH<sub>2</sub>C $\equiv$ CH), 3.87 (br q, 1H, *J*<sub>5,6</sub> = 6.6 Hz, H-5), 3.42 (br d, 1H, *J*<sub>3,4</sub> = 2.5 Hz, H-4), 3.07 (ddd, 1H, *J*<sub>2a,3</sub> = 12.7 Hz, *J*<sub>2e,3</sub> = 5.0 Hz, *J*<sub>3,4</sub> = 2.5 Hz, H-3), 2.79 (t, 1H, *J* = 2.5 Hz, OCH<sub>2</sub>C $\equiv$ CH), 1.67 (ddd, 1H, *J*<sub>2a,2e</sub> = *J*<sub>2a,3</sub> = 12.7 Hz, *J*<sub>1,2a</sub> = 3.4 Hz, H-2a), 1.74 (ddd, 1H, *J*<sub>2a,2e</sub> = 12.7 Hz, *J*<sub>2e,3</sub> = 5.0 Hz, *J*<sub>1,2e</sub> = 1.1 Hz, H-2e), 1.19 (d, 3H, *J*<sub>5,6</sub> = 6.6 Hz, H-6); <sup>13</sup>C NMR (100 MHz, CD<sub>3</sub>OD,  $\delta$ <sub>C</sub>) 96.8 (C-1), 80.5 (C $\equiv$ CH), 79.3 (C-4), 75.4 (C $\equiv$ CH), 69.9 (C-5), 54.8 (OCH<sub>2</sub>), 50.3 (C-3), 38.2 (C-2), 18.1 (C-6). HRMS (ESI) calcd for (M+H) C<sub>9</sub>H<sub>16</sub>NO<sub>3</sub>: 186.1125. Found: 186.1123. Anal. calcd for C<sub>9</sub>H<sub>15</sub>NO<sub>3</sub>: C, 58.36; H, 8.16; N, 7.56. Found C, 58.18; H, 8.08; N, 7.67.

### 2-Propargyl 3-amino-2,3,6-trideoxy- $\alpha$ -L-arabino-hexopyranoside (37)

To a solution of **33** (1.27 g, 6.01 mmol) in THF (80 mL) and H<sub>2</sub>O (14 mL) was added PPh<sub>3</sub> (3.17 g, 12.1 mmol), and the reaction mixture was heated at reflux for 10 h. After concentration of the solution, the residue was purified by column chromatography on Iatrobeds (EtOAc  $\rightarrow$  CH<sub>3</sub>OH) to yield pure **37** (1.08 g, 97%) as a white amorphous solid: R<sub>f</sub> 0.34 (CH<sub>3</sub>OH); IR  $\nu$  3341.0 (N–H), 3296.7 ( $\equiv$ C–H), 3090.3 (O–H) cm<sup>-1</sup>; [ $\alpha$ ]<sub>D</sub><sup>23</sup> –175.8 (*c* 0.80, CH<sub>3</sub>OH); <sup>1</sup>H NMR (500 MHz, CD<sub>3</sub>OD,  $\delta$ <sub>H</sub>) 4.96 (br d, 1H, *J*<sub>1,2a</sub> = 3.4 Hz, H-1), 4.18 (d, 2H, *J* = 2.4 Hz, OCH<sub>2</sub>C $\equiv$ CH), 3.58 (dq, 1H, *J*<sub>4,5</sub> = 9.3 Hz, *J*<sub>5,6</sub> = 6.3 Hz, H-5), 2.94 (ddd, 1H, *J*<sub>2a,3</sub> = 12.1 Hz, *J*<sub>3,4</sub> = 9.3 Hz, *J*<sub>2e,3</sub> = 4.6 Hz, H-3), 2.82 (dd, 1H, *J*<sub>3,4</sub> = *J*<sub>4,5</sub> = 9.3 Hz, H-4), 2.79 (t, 1H, *J* = 2.4 Hz, OCH<sub>2</sub>C $\equiv$ CH), 1.98 (ddd, 1H, *J*<sub>2a,2e</sub> = 13.4 Hz, *J*<sub>2e,3</sub> = 4.6 Hz, *J*<sub>1,2e</sub> = 1.3 Hz, H-2e), 1.56 (ddd, 1H, *J*<sub>2a,2e</sub> = 13.4 Hz, *J*<sub>2a,3</sub> = 12.1 Hz, *J*<sub>1,2a</sub> = 3.4 Hz, H-2a), 1.21 (d, 3H, *J*<sub>5,6</sub> = 6.3 Hz, H-6); <sup>13</sup>C NMR (100 MHz, CD<sub>3</sub>OD,  $\delta$ <sub>C</sub>) 96.8 (C-1), 80.5 (C $\equiv$ CH), 79.3 (C-4), 75.4 (C $\equiv$ CH), 69.9 (C-5),

54.8 (OCH<sub>2</sub>), 50.3 (C-3), 38.2 (C-2), 18.1 (C-6). HRMS (ESI) calcd for (M+H) C<sub>9</sub>H<sub>16</sub>NO<sub>3</sub>: 186.1125. Found: 186.1124. Anal. calcd for C<sub>9</sub>H<sub>15</sub>NO<sub>3</sub>: C, 58.36; H, 8.16; N, 7.56. Found C, 58.19; H, 8.13; N, 7.77.

**Methyl 4-*O*-acetyl-2,3,6-trideoxy- $\alpha$ -L-erythro-hexopyranoside (40 $\alpha$ ) and Methyl 4-*O*-acetyl-2,3,6-trideoxy- $\beta$ -L-erythro-hexopyranoside (40 $\beta$ )**

A solution of the mixture of **39 $\alpha$**  and **39 $\beta$**  (282 mg, 1.52 mmol) in EtOAc (40 mL) was hydrogenated in the presence of 10% Pd/C (8 mg, 2.7% mass ratio) at room temperature and normal pressure. Once the starting material was fully consumed (about 3.5 h), the reaction mixture was filtered through a Celite pad and concentrated. The crude product was purified by column chromatography (8:1, hexanes–EtOAc) to acquire pure **40 $\alpha$**  as a colorless oil and pure **40 $\beta$**  as a white amorphous solid (256 mg for **40 $\alpha$**  and **40 $\beta$**  together, 90%,  $\alpha$ : $\beta$  = 4.6:1). (**40 $\alpha$** ): *R<sub>f</sub>* 0.64 (6:1 hexanes–EtOAc); IR:  $\nu$  1738 (C=O) cm<sup>-1</sup>; [ $\alpha$ ]<sub>D</sub><sup>23</sup> -192.4 (*c* 4.0, CH<sub>2</sub>Cl<sub>2</sub>); <sup>1</sup>H NMR (400 MHz, CDCl<sub>3</sub>,  $\delta$ <sub>H</sub>) 4.63 (br s, 1H, H-1), 4.44–4.52 (m, 1H, H-4), 3.77 (dq, 1H, *J*<sub>4,5</sub> = 9.7 Hz, *J*<sub>5,6</sub> = 6.3 Hz, H-5), 3.37 (s, 3H, OCH<sub>3</sub>), 2.05 (s, 3H, O=CCH<sub>3</sub>), 1.86–1.94 (m, 1H, H-3e), 1.70–1.84 (m, 3H, H-2a, H-2e, H-3a), 1.15 (d, 3H, *J*<sub>5,6</sub> = 6.3 Hz, H-6); <sup>13</sup>C NMR (100 MHz, CDCl<sub>3</sub>,  $\delta$ <sub>C</sub>) 170.2 (C=O), 97.3 (C-1), 73.5 (C-4), 66.3 (C-5), 54.5 (OCH<sub>3</sub>), 29.0 (C-2), 24.0 (C-3), 21.1 (O=CCH<sub>3</sub>), 17.8 (C-6). HRMS (ESI) calcd for (M+Na) C<sub>9</sub>H<sub>16</sub>O<sub>4</sub>Na: 211.0941. Found: 211.0941. Anal. calcd for C<sub>9</sub>H<sub>16</sub>O<sub>4</sub>: C, 57.43; H, 8.57. Found C, 57.08; H, 8.74.

(**40 $\beta$** ): *R<sub>f</sub>* 0.60 (6:1 hexanes–EtOAc); IR:  $\nu$  1731 (C=O) cm<sup>-1</sup>; [ $\alpha$ ]<sub>D</sub><sup>23</sup> +17.0 (*c* 1.4, CH<sub>2</sub>Cl<sub>2</sub>); <sup>1</sup>H NMR (400 MHz, CDCl<sub>3</sub>,  $\delta$ <sub>H</sub>) 4.42 (ddd, 1H, *J*<sub>3a,4</sub> = 10.4 Hz, *J*<sub>4,5</sub> = 9.1 Hz, *J*<sub>3e,4</sub> = 4.1 Hz, H-4), 4.36 (dd, 1H, *J*<sub>1,2a</sub> = 9.0 Hz, *J*<sub>1,2e</sub> = 2.2 Hz, H-1), 3.48 (dq, 1H, *J*<sub>4,5</sub> = 9.1 Hz, *J*<sub>5,6</sub> = 6.2 Hz, H-5), 3.45 (s, 3H, OCH<sub>3</sub>), 2.13 (dddd, 1H, *J*<sub>3a,3e</sub> = 13.0 Hz, *J*<sub>2e,3e</sub> = *J*<sub>3e,4</sub> = *J*<sub>2a,3e</sub> = 4.1 Hz, H-3e), 2.02 (s, 3H, O=CCH<sub>3</sub>), 1.86 (dddd, 1H, *J*<sub>2a,2e</sub> = 13.0 Hz, *J*<sub>2e,3e</sub> = *J*<sub>2e,3a</sub> = 4.1 Hz, *J*<sub>1,2e</sub> = 2.2 Hz, H-2e), 1.59 (dddd, 1H, *J*<sub>2a,2e</sub> = *J*<sub>2a,3a</sub> = 13.0 Hz, *J*<sub>1,2a</sub> = 9.0 Hz, *J*<sub>2a,3e</sub> = 4.1 Hz, H-2a), 1.45 (dddd, 1H, *J*<sub>3a,3e</sub> = *J*<sub>2a,3a</sub> = 13.0 Hz, *J*<sub>3a,4</sub> = 10.4 Hz, *J*<sub>2e,3a</sub> = 4.1 Hz, H-3a), 1.20 (d, 3H, *J*<sub>5,6</sub> = 6.2 Hz, H-6); <sup>13</sup>C NMR (100 MHz, CDCl<sub>3</sub>,  $\delta$ <sub>C</sub>) 170.2 (C=O), 102.4 (C-1), 73.1 (C-5), 72.9 (C-4), 56.2 (OCH<sub>3</sub>), 29.9 (C-2), 27.1 (C-3), 21.1 (O=CCH<sub>3</sub>), 18.1

(C-6). HRMS (ESI) calcd for (M+Na) C<sub>9</sub>H<sub>16</sub>O<sub>4</sub>Na: 211.0941. Found: 209.0942. Anal. calcd for C<sub>9</sub>H<sub>16</sub>O<sub>4</sub>: C, 57.43; H, 8.57. Found C, 57.47; H, 8.55.

**Methyl 2,3,6-trideoxy- $\alpha$ -L-erythro-hexopyranoside (42 $\alpha$ ) and Methyl 2,3,6-trideoxy- $\beta$ -L-erythro-hexopyranoside (42 $\beta$ )**

A mixture of compounds **40 $\alpha$**  and **40 $\beta$**  (1.85 g, 9.84 mmol) was dissolved in CH<sub>3</sub>OH (100 mL). To the above solution was added K<sub>2</sub>CO<sub>3</sub> (0.54 g, 3.9 mmol), and then the reaction was stirred for 12 h. The solvent was evaporated and the residue was purified by column chromatography (2:1, hexanes–EtOAc) to acquire pure **42 $\alpha$**  (0.73 g) and **42 $\beta$**  (0.09 g), and their mixture (0.49 g) as a colorless oil respectively (1.31 g, 91%,  $\alpha$ : $\beta$  = 5.1:1). (**42 $\alpha$** ): R<sub>f</sub> 0.22 (2:1 hexanes–EtOAc); IR:  $\nu$  3434 (O–H) cm<sup>-1</sup>; [ $\alpha$ ]<sub>D</sub><sup>23</sup> –168.6 (*c* 1.7, CH<sub>2</sub>Cl<sub>2</sub>); <sup>1</sup>H NMR (500 MHz, CDCl<sub>3</sub>,  $\delta$ <sub>H</sub>) 4.60 (br s, 1H, H-1), 3.54 (dq, 1H,  $J_{4,5}$  = 9.2 Hz,  $J_{5,6}$  = 6.2 Hz, H-5), 3.32 (s, 3H, OCH<sub>3</sub>), 3.30–3.36 (m, 1H, H-4), 1.94 (br s, 1H, OH), 1.65–1.85 (m, 4H, H-2a, H-2e, H-3a, H-3e), 1.24 (d, 3H,  $J_{5,6}$  = 6.2 Hz, H-6); <sup>13</sup>C NMR (125 MHz, CDCl<sub>3</sub>,  $\delta$ <sub>C</sub>) 97.3 (C-1), 72.0 (C-4), 69.3 (C-5), 54.4 (OCH<sub>3</sub>), 29.5 (C-2), 27.6 (C-3), 17.9 (C-6). HRMS (ESI) calcd for (M+Na) C<sub>7</sub>H<sub>14</sub>O<sub>3</sub>Na: 169.0835. Found: 169.0834. Anal. calcd for C<sub>7</sub>H<sub>14</sub>O<sub>3</sub>: C, 57.51; H, 9.65. Found C, 57.64; H, 9.77.

(**42 $\beta$** ): R<sub>f</sub> 0.17 (2–1 hexanes:EtOAc); IR:  $\nu$  3411 (O–H) cm<sup>-1</sup>; [ $\alpha$ ]<sub>D</sub><sup>23</sup> +47.0 (*c* 1.0, CH<sub>2</sub>Cl<sub>2</sub>); <sup>1</sup>H NMR (500 MHz, CDCl<sub>3</sub>,  $\delta$ <sub>H</sub>) 4.36 (dd, 1H,  $J_{1,2a}$  = 9.2 Hz,  $J_{1,2e}$  = 2.0 Hz, H-1), 3.48 (s, 3H, OCH<sub>3</sub>), 3.25–3.32 (m, 2H, H-4, H-5), 2.03–2.08 (m, 1H, H-3e), 1.86–1.91 (m, 1H, H-2e), 1.53–1.66 (m, 2H, H-2a, OH), 1.43–1.52 (m, 1H, H-3a), 1.32 (d, 3H,  $J_{5,6}$  = 5.9 Hz, H-6); <sup>13</sup>C NMR (125 MHz, CDCl<sub>3</sub>,  $\delta$ <sub>C</sub>) 102.5 (C-1), 75.7 (C-5), 71.6 (C-4), 56.3 (OCH<sub>3</sub>), 31.0 (C-2/C-3), 30.5 (C-3/C-2), 18.0 (C-6). HRMS (EI) calcd for C<sub>7</sub>H<sub>14</sub>O<sub>3</sub>: 146.0943. Found: 146.0940. Anal. calcd for C<sub>7</sub>H<sub>14</sub>O<sub>3</sub>: C, 57.51; H, 9.65. Found C, 58.02; H, 9.76.

**Methyl 4-azido-2,3,4,6-trideoxy- $\alpha$ -L-threo-hexopyranoside (43 $\alpha$ ) and Methyl 4-azido-2,3,4,6-trideoxy- $\beta$ -L-threo-hexopyranoside (43 $\beta$ )**

Compounds **42a** and **42b** (378 mg, 2.59 mmol) were dissolved in CH<sub>2</sub>Cl<sub>2</sub> (20 mL), and Et<sub>3</sub>N (1.08 mL, 7.77 mmol) was added. The solution was cooled to 0 °C and then mesyl chloride (0.40 mL, 5.2 mmol) was added dropwise. After stirring for 2 h, the reaction mixture was washed with 1N HCl, 1N NaOH and brine sequentially. The solution was dried over Na<sub>2</sub>SO<sub>4</sub>. After filtration, the solvent was evaporated and the acquired yellow oil was dissolved in DMF (7 mL). To this solution was added NaN<sub>3</sub> (933 mg, 14.4 mmol) and the reaction mixture was stirred at 110 °C for 24 h before cooling and extraction with Et<sub>2</sub>O. The ether solution was dried (Na<sub>2</sub>SO<sub>4</sub>), filtered, and evaporated. The resulting residue was purified by column chromatography (20:1, hexanes–EtOAc) to acquire pure **43a** (230 mg) and **43b** (22 mg), and their mixture (83 mg) as colorless oils respectively (335 mg, 76%). (**43a**): R<sub>f</sub> 0.24 (20:1 hexanes–EtOAc); IR: ν 2098 cm<sup>-1</sup> (N=N=N); [α]<sub>D</sub><sup>23</sup> -71.9 (c 3.6, CH<sub>2</sub>Cl<sub>2</sub>); <sup>1</sup>H NMR (500 MHz, CDCl<sub>3</sub>, δ<sub>H</sub>) 4.68 (br d, 1H, J<sub>12a or 2e</sub> = 2.7 Hz, H-1), 3.95 (dq, 1H, J<sub>5,6</sub> = 6.5 Hz, J<sub>4,5</sub> = 1.7 Hz, H-5), 3.42 (br s, 1H, H-4), 3.32 (s, 3H, OCH<sub>3</sub>), 2.06–2.14 (m, 1H, H-3e), 1.84–1.95 (m, 2H, H-3a, H-2e), 1.51–1.57 (m, 1H, H-2a), 1.20 (d, 3H, J<sub>5,6</sub> = 6.5 Hz, H-6); <sup>13</sup>C NMR (125 MHz, CDCl<sub>3</sub>, δ<sub>C</sub>) 97.9 (C-1), 65.0 (C-5), 59.9 (C-4), 54.6 (OCH<sub>3</sub>), 24.0 (C-2), 23.0 (C-3), 17.9 (C-6). HRMS (EI) calcd for C<sub>7</sub>H<sub>13</sub>N<sub>3</sub>O<sub>2</sub>: 171.1008. Found: 171.0993. Anal. calcd for C<sub>7</sub>H<sub>13</sub>N<sub>3</sub>O<sub>2</sub>: C, 49.11; H, 7.65; N, 24.54. Found C, 49.33; H, 8.00; N, 24.69.

(**43b**): R<sub>f</sub> 0.13 (20:1 hexanes–EtOAc); IR: ν 2096 cm<sup>-1</sup> (N=N=N); [α]<sub>D</sub><sup>23</sup> +164.1 (c 1.9, CH<sub>2</sub>Cl<sub>2</sub>); <sup>1</sup>H NMR (500 MHz, CDCl<sub>3</sub>, δ<sub>H</sub>) 4.35 (m, 1H, H-1), 3.66 (dq, 1H, J<sub>5,6</sub> = 6.4 Hz, J<sub>4,5</sub> = 1.7 Hz, H-5), 3.48 (s, 3H, OCH<sub>3</sub>), 3.36–3.40 (m, 1H, H-4), 2.11–2.17 (m, 1H, H-3e), 1.77–1.85 (m, 1H, H-3a), 1.65–1.75 (m, 2H, H-2a, H-2e), 1.30 (d, 3H, J<sub>5,6</sub> = 6.4 Hz, H-6); <sup>13</sup>C NMR (125 MHz, CDCl<sub>3</sub>, δ<sub>C</sub>) 102.6 (C-1), 72.7 (C-5), 59.0 (C-4), 55.9 (OCH<sub>3</sub>), 26.8 (C-3), 25.8 (C-2), 17.9 (C-6). HRMS (ESI) calcd for (M+Na) C<sub>7</sub>H<sub>13</sub>N<sub>3</sub>O<sub>2</sub>Na: 194.0900. Found: 194.0901.

**2-Propargyl 4-azido-2,3,4,6-trideoxy-α-L-threo-hexopyranoside (44a)** and **2-Propargyl 4-azido-2,3,4,6-trideoxy-β-L-threo-hexopyranoside (44b)**



To a flask were added the mixture of **43a** and **43b** (200 mg, 1.17 mmol), crushed activated 4Å molecular sieves (100 mg), propargyl alcohol (0.41 mL, 7.0 mmol), and CH<sub>2</sub>Cl<sub>2</sub> (5 mL). The mixture was stirred for 10 min at room temperature, cooled to -40 °C, and then BF<sub>3</sub>•Et<sub>2</sub>O (0.37 mL, 2.9 mmol) was added dropwise via syringe. After adding the BF<sub>3</sub>•Et<sub>2</sub>O, the reaction mixture was warmed to -10 °C. Once the starting material was fully consumed (about 4 h), the reaction mixture was quenched by the addition of K<sub>2</sub>CO<sub>3</sub> (150 mg). Next, H<sub>2</sub>O (5 mL), satd aqueous NaHCO<sub>3</sub> solution (5 mL) and CH<sub>2</sub>Cl<sub>2</sub> (15 mL) were added. The organic layer was separated, washed with brine, dried (Na<sub>2</sub>SO<sub>4</sub>), filtered, and concentrated. The crude product was purified by column chromatography (30:1, hexanes–EtOAc) to acquire pure **44a** and **44b** both as colorless oils (203 mg, 89%, α:β = 3.5:1). (**44a**): R<sub>f</sub> 0.32 (20:1 hexanes–EtOAc); IR: ν 3297 (≡C–H), 2100 (N=N=N) cm<sup>-1</sup>; [α]<sub>D</sub><sup>23</sup> -109.0 (*c* 1.5, CH<sub>2</sub>Cl<sub>2</sub>); <sup>1</sup>H NMR (500 MHz, CDCl<sub>3</sub>, δ<sub>H</sub>) 4.60 (br d, 1H, *J*<sub>1,2a or 2e</sub> = 3.5 Hz, H-1), 4.22 (dd, 1H, *J* = 15.7 Hz, *J* = 2.4 Hz, OCH<sub>2</sub>C≡CH), 4.17 (dd, 1H, *J* = 15.7 Hz, *J* = 2.4 Hz, OCH<sub>2</sub>C≡CH), 4.00 (dq, 1H, *J*<sub>5,6</sub> = 6.5 Hz, *J*<sub>4,5</sub> = 1.7 Hz, H-5), 3.45 (br s, 1H, H-4), 2.41 (t, 1H, *J* = 2.4 Hz, OCH<sub>2</sub>C≡CH), 2.10–2.18 (m, 1H, H-3e), 1.87–2.00 (m, 2H, H-3a, H-2e), 1.58–1.63 (m, 1H, H-2a), 1.20 (d, 3H, *J*<sub>5,6</sub> = 6.5 Hz, H-6); <sup>13</sup>C NMR (125 MHz, CDCl<sub>3</sub>, δ<sub>C</sub>) 95.9 (C-1), 79.5 (C≡CH), 74.6 (C≡CH), 65.6 (C-5), 59.8 (C-4), 54.2 (OCH<sub>2</sub>), 23.8 (C-2), 22.9 (C-3), 17.8 (C-6). HRMS (EI) calcd for C<sub>9</sub>H<sub>13</sub>N<sub>3</sub>O<sub>2</sub> (loss of –OCH<sub>2</sub>C≡CH): 140.0824. Found: 140.0828. Anal. calcd for C<sub>7</sub>H<sub>13</sub>N<sub>3</sub>O<sub>2</sub>: C, 55.37; H, 6.71; N, 21.52. Found C, 55.85; H, 7.02; N, 21.74.

(**44b**): R<sub>f</sub> 0.22 (20:1 hexanes–EtOAc); IR: ν 3297 (≡C–H), 2098 (N=N=N) cm<sup>-1</sup>; [α]<sub>D</sub><sup>23</sup> +208.6 (*c* 0.9, CH<sub>2</sub>Cl<sub>2</sub>); <sup>1</sup>H NMR (500 MHz, CDCl<sub>3</sub>, δ<sub>H</sub>) 4.66 (dd, 1H, *J*<sub>1,2a</sub> = 8.8 Hz, *J*<sub>1,2e</sub> = 3.1 Hz, H-1), 4.38 (dd, 1H, *J* = 15.7 Hz, *J* = 2.4 Hz, OCH<sub>2</sub>C≡CH), 4.34 (dd, 1H, *J* = 15.7 Hz, *J* = 2.4 Hz, OCH<sub>2</sub>C≡CH), 3.68 (dq, 1H, *J*<sub>5,6</sub> = 6.3 Hz, *J*<sub>4,5</sub> = 1.7 Hz, H-5), 3.40 (br s, 1H, H-4), 2.40 (t, 1H, *J* = 2.4 Hz, OCH<sub>2</sub>C≡CH), 2.13–2.19 (m, 1H, H-3e), 1.68–1.88 (m, 3H, H-2a, H-2e, H-3a), 1.29 (d, 3H, *J*<sub>5,6</sub> = 6.3 Hz, H-6); <sup>13</sup>C NMR (125 MHz, CDCl<sub>3</sub>, δ<sub>C</sub>) 99.1 (C-1), 79.3 (C≡CH), 74.3 (C≡CH), 72.9 (C-5), 59.0 (C-4), 54.6 (OCH<sub>2</sub>), 26.8 (C-3), 25.7 (C-2), 17.8 (C-6). HRMS (ESI) calcd for (M+Na) C<sub>9</sub>H<sub>13</sub>N<sub>3</sub>O<sub>2</sub>Na: 218.0900. Found: 218.0901.

### 2-Propargyl 4-amino-2,3,4,6-trideoxy- $\alpha$ -L-threo-hexopyranoside (45)

To a solution of compound **44a** (423 mg, 2.17 mmol) in THF (25 mL) and H<sub>2</sub>O (0.39 mL) was added PPh<sub>3</sub> (0.85 g, 3.3 mmol), and the reaction was stirred for 10 h under reflux. After cooling and evaporation, the residue was purified by column chromatography (EtOAc  $\rightarrow$  CH<sub>3</sub>OH) to yield pure **45** (313 mg, 85%) as a foamy white solid: *R<sub>f</sub>* 0.39 (5:1 CH<sub>2</sub>Cl<sub>2</sub>-CH<sub>3</sub>OH); IR:  $\nu$  3392 (N-H), 3295 ( $\equiv$ C-H), 3257 (N-H), 2118 (C $\equiv$ C) cm<sup>-1</sup>;  $[\alpha]_D^{23}$  -156.1 (*c* 3.5, CH<sub>3</sub>OH); <sup>1</sup>H NMR (500 MHz, CD<sub>3</sub>OD,  $\delta_H$ ) 4.60 (br d, 1H, *J*<sub>1,2a or 2e</sub> = 3.6 Hz, H-1), 4.20 (d, 2H, *J* = 2.4 Hz, OCH<sub>2</sub>C $\equiv$ CH), 4.00 (dq, 1H, *J*<sub>5,6</sub> = 6.7 Hz, *J*<sub>4,5</sub> = 1.5 Hz, H-5), 2.80 (t, 1H, *J* = 2.4 Hz, OCH<sub>2</sub>C $\equiv$ CH), 2.71 (br s, 1H, H-4), 2.00–2.09 (m, 1H, H-3e), 1.88–1.96 (m, 1H, H-2e), 1.58–1.64 (m, 1H, H-3a), 1.45–1.51 (m, 1H, H-2a), 1.10 (d, 3H, *J*<sub>5,6</sub> = 6.7 Hz, H-6); <sup>13</sup>C NMR (125 MHz, CD<sub>3</sub>OD,  $\delta_C$ ) 97.1 (C-1), 80.7 (C $\equiv$ CH), 75.4 (C $\equiv$ CH), 67.6 (C-5), 54.8 (OCH<sub>2</sub>), 49.2 (C-4), 26.7 (C-3), 24.1 (C-2), 17.7 (C-6). HRMS (ESI) calcd for (M+H) C<sub>9</sub>H<sub>16</sub>NO<sub>2</sub>: 170.1176. Found: 170.1177. Anal. calcd for C<sub>9</sub>H<sub>15</sub>NO<sub>2</sub>: C, 63.88; H, 8.93; N, 8.28. Found C, 63.99; H, 9.01; N, 7.90.

### 3-(2-Phenyl-benzo[*b*]furan-3-yl)-prop-2-ynyl 4-O-acetyl-2,3,6-trideoxy- $\alpha$ -L-erythro-hexopyranoside (46)

Compound **24** (97.9 mg, 0.39 mmol), compound **40** (110.3 mg, 0.59 mmol), and crushed activated 4Å molecular sieves (30 mg) were suspended in anhydrous CH<sub>2</sub>Cl<sub>2</sub> (5 mL). The mixture was stirred for 5–10 min at room temperature and then cooled to -10 °C. BF<sub>3</sub>•Et<sub>2</sub>O (102  $\mu$ L, 0.8 mmol) was added dropwise via syringe. After adding BF<sub>3</sub>•Et<sub>2</sub>O, the reaction mixture was warmed to 0 °C. Once the starting material was fully consumed, the reaction mixture was quenched by the addition of K<sub>2</sub>CO<sub>3</sub> (0.1 g), and then H<sub>2</sub>O (10 mL), satd NaHCO<sub>3</sub> solution (5 mL) and CH<sub>2</sub>Cl<sub>2</sub> (20 mL) were added. The organic layer was separated, washed with brine, and was dried (Na<sub>2</sub>SO<sub>4</sub>), filtered and concentrated. The crude product was purified by column chromatography (10:1, hexanes–EtOAc) giving pure **46** as a yellow paste (77.3 mg, 49%). (**46**): *R<sub>f</sub>* 0.46 (4:1 hexanes–EtOAc); IR:  $\nu$  2222 (C $\equiv$ C), 1737 (C=O) cm<sup>-1</sup>;  $[\alpha]_D$  -108.0 (*c* 5.6, CH<sub>2</sub>Cl<sub>2</sub>); <sup>1</sup>H NMR (500 MHz, CDCl<sub>3</sub>,  $\delta_H$ ) 8.26–8.30 (m, 2H, Ar), 7.66–7.70 (m, 1H, Ar),

7.47–7.53 (m, 3H, Ar), 7.39–7.43 (m, 1H, Ar), 7.28–7.36 (m, 2H, Ar), 5.13 (br s, 1H, H-1), 4.64 (s, 2H, OCH<sub>2</sub>C≡C), 4.52–4.58 (m, 1H, H-4), 3.93 (dq, 1H,  $J_{4,5} = 9.6$  Hz,  $J_{5,6} = 6.3$  Hz, H-5), 2.06 (s, 3H, O=CCH<sub>3</sub>), 1.83–2.01 (m, 4H, H-2a, H-2e, H-3a, H-3e), 1.20 (d, 3H,  $J_{5,6} = 6.3$  Hz, H-6); <sup>13</sup>C NMR (125 MHz, CDCl<sub>3</sub>, δ<sub>C</sub>) 170.2 (C=O), 156.8 (Ar), 153.4 (Ar), 129.9(9) (Ar), 129.9(6) (Ar), 129.2 (Ar), 128.6 (2, Ar), 126.0 (2, Ar), 125.3 (Ar), 123.4 (Ar), 120.3 (Ar), 111.2 (Ar), 98.5 (Ar), 95.0 (C-1), 92.6 (≡C), 77.8 (≡C), 73.4 (C-4), 67.1 (C-5), 55.0 (OCH<sub>2</sub>), 29.0 (C-2), 24.1 (C-3), 21.2 (O=CCH<sub>3</sub>), 17.9 (C-6). HRMS (ESI) calcd for (M+Na) C<sub>25</sub>H<sub>24</sub>O<sub>5</sub>Na: 427.1516. Found: 427.1517. Anal. calcd for C<sub>25</sub>H<sub>24</sub>O<sub>5</sub>: C, 74.24; H, 5.98. Found C, 74.50; H, 6.33.

**3-(2-Phenyl-benzo[*b*]thiophen-3-yl)-prop-2-ynyl 4-*O*-acetyl-2,3,6-trideoxy- $\alpha$ -L-erythro-hexopyranoside (47)**

Compound **47** was synthesized from **25** (124.2 mg, 0.47 mmol) and **40** (133.2 mg, 0.71 mmol) in 43% yield by following the same procedure used for the synthesis of **46**. (**47**): white needle-like solid after recrystallization from hexanes–Et<sub>2</sub>O (2:1), m.p.: 89–91 °C;  $R_f$  0.36 (6:1 hexanes–EtOAc); IR:  $\nu$  2216 (C≡C), 1736 (C=O) cm<sup>-1</sup>; [ $\alpha$ ]<sub>D</sub> –120.2 (*c* 1.4, CH<sub>2</sub>Cl<sub>2</sub>); <sup>1</sup>H NMR (400 MHz, CDCl<sub>3</sub>, δ<sub>H</sub>) 7.96–8.00 (m, 2H, Ar), 7.92–7.96 (m, 1H, Ar), 7.79–7.82 (m, 1H, Ar), 7.36–7.50 (m, 5H, Ar), 5.08 (br s, 1H, H-1), 4.58 (s, 2H, OCH<sub>2</sub>C≡C), 4.50–4.57 (m, 1H, H-4), 3.89 (dq, 1H,  $J_{4,5} = 9.7$  Hz,  $J_{5,6} = 6.3$  Hz, H-5), 2.06 (s, 3H, O=CCH<sub>3</sub>), 1.80–2.00 (m, 4H, H-2a, H-2e, H-3a, H-3e), 1.17 (d, 3H,  $J_{5,6} = 6.3$  Hz, H-6); <sup>13</sup>C NMR (100 MHz, CDCl<sub>3</sub>, δ<sub>C</sub>) 170.2 (C=O), 146.9 (Ar), 141.1 (Ar), 137.5 (Ar), 133.7 (Ar), 128.8 (Ar), 128.7 (2, Ar), 128.4 (2, Ar), 125.2 (Ar), 124.9 (Ar), 123.3 (Ar), 122.0 (Ar), 112.9 (Ar), 94.8 (C-1), 90.2 (≡C), 80.4 (≡C), 73.4 (C-4), 67.0 (C-5), 54.8 (OCH<sub>2</sub>), 29.0 (C-2), 24.0 (C-3), 21.2 (O=CCH<sub>3</sub>), 17.8 (C-6). HRMS (ESI) calcd for (M+Na) C<sub>25</sub>H<sub>24</sub>O<sub>4</sub>SNa: 443.1288. Found: 443.1289. Anal. calcd for C<sub>25</sub>H<sub>24</sub>O<sub>4</sub>S: C, 71.40; H, 5.75; S, 7.63. Found C, 71.34; H, 5.80; S, 7.41.

sw-03-161  
500 MHz 1D in CD3OD (ref. to CD3OD @ 3.30 ppm), temp 27.2 C -> actual temp = 27.0 C, sw500 probe  
date: Oct 16 2005 sweep width: 6001Hz acq.time: 2.0s relax.time: 3.0s # scans: 16 dig.res.: 0.1 Hz/pt hz/mm:25.0  
spectrometer:d601 file:/mnt/d600/home9/tllmtr/nmrdata/wel.shi/Project 1-book 3/101-208/sw-03-161.fid

Pulse Sequence: s2pu1

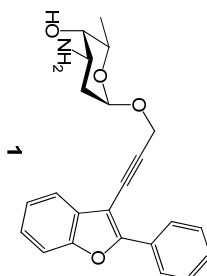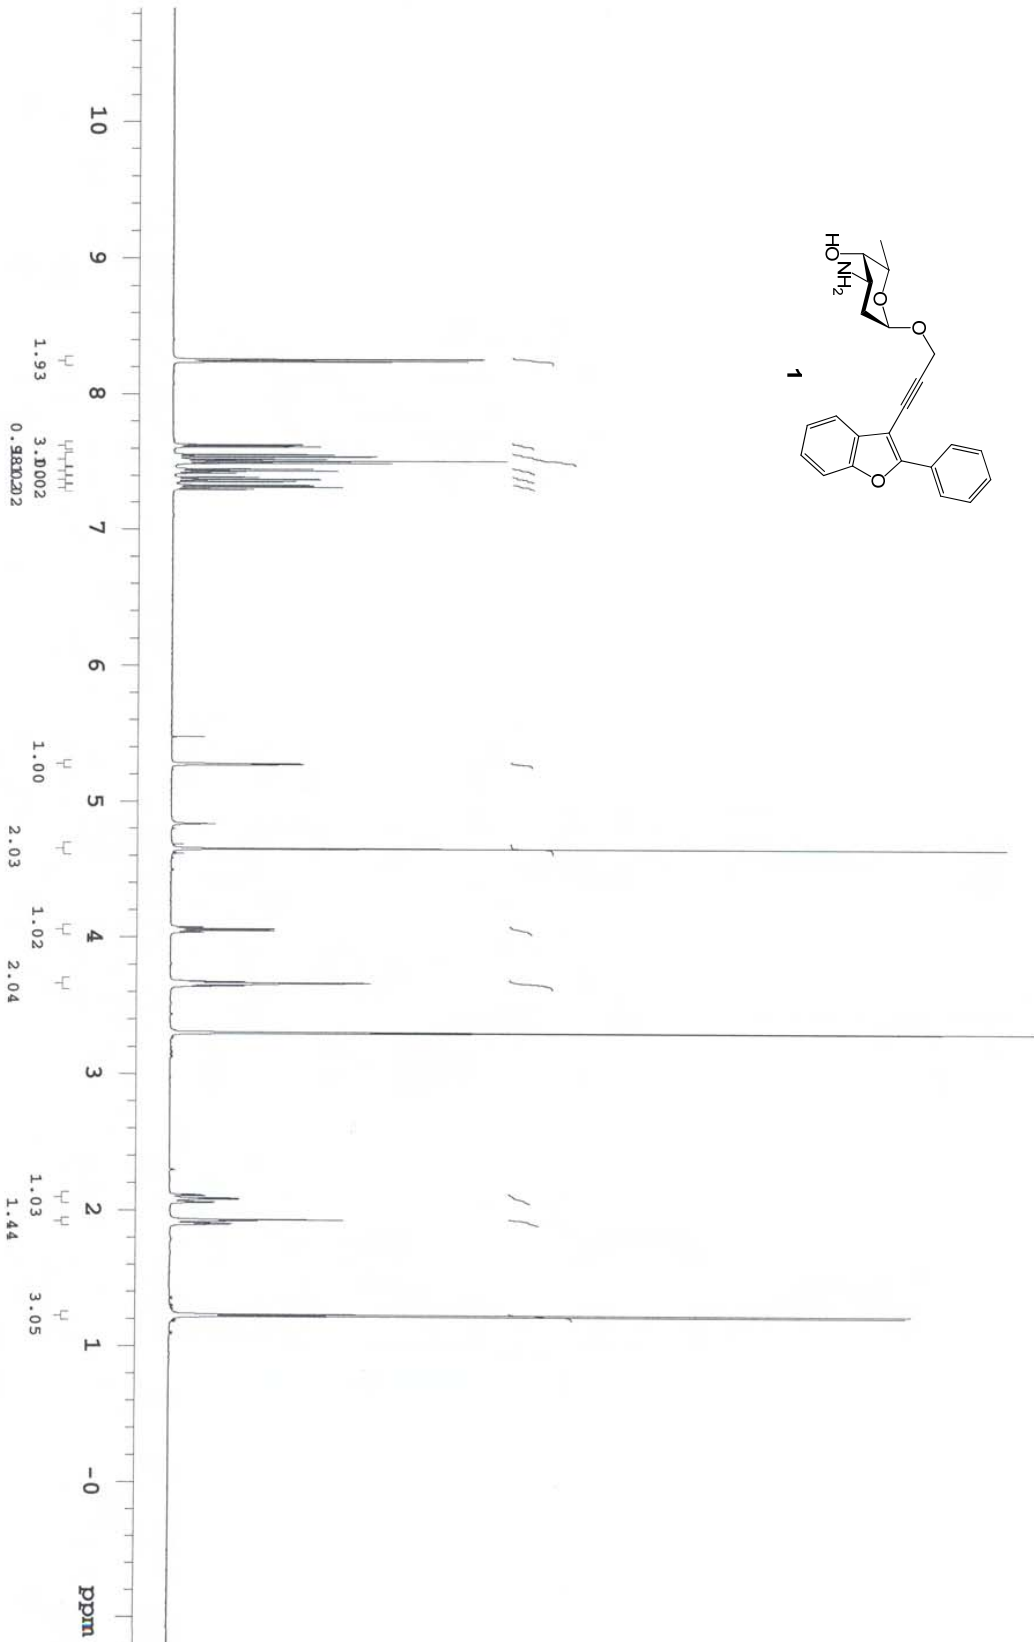

sw-03-161  
 125 MHz AP1 in CD3OD (ref. to CD3OD @ 49.0 ppm), temp 27.2 C -> actual temp = 27.0 C, sw probe  
 gachigbank, 2045, styggyhhe 33887 Hf agqr, kane: 20051 relax.time: 0.1s # scans: 800 dig.res: 0.5 Hz/pt hz/mm: 140.9  
 Spectrometer: d601 file: /mnt/d600/home9/llimnr/nmrdata/wei.shi/Project 1-book 3/101-208/sw-03-161-AP1.F1d

Pulse Sequence: apt

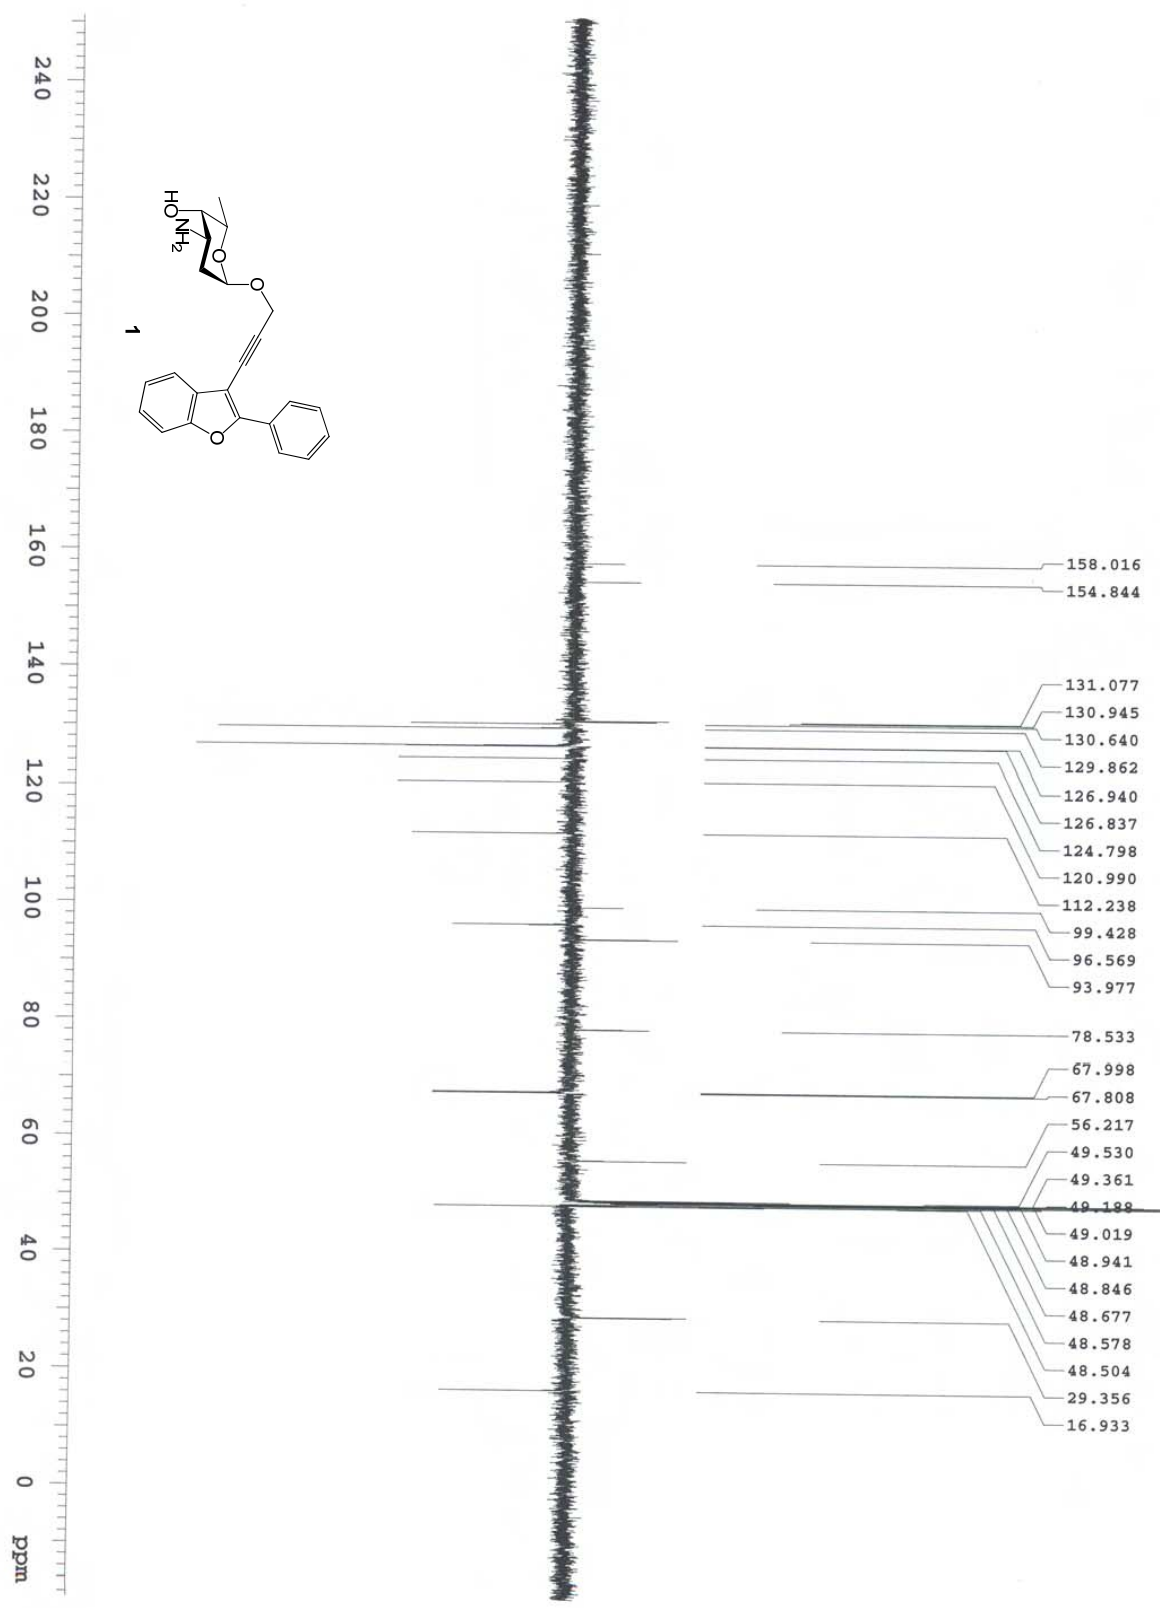

sw-03-163  
 500 MHz 1D in CD3OD (ref. to CD3OD @ 3.30 ppm), temp 27.2 C -> actual temp = 27.0 C, sw500 probe  
 date: Oct 16 2005 sweep width: 6001Hz acq.time: 2.0s relax.time: 3.0s # scans: 16 dig.res.: 0.1 Hz/pt hz/mm:25.0  
 spectrometer:d601 file:/mnt/d600/home9/cilnmr/nmrdata/wei.shi/Project 1-book 3/101-208/sw-03-163.fid

Pulse Sequence: s2pu1

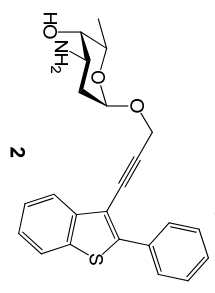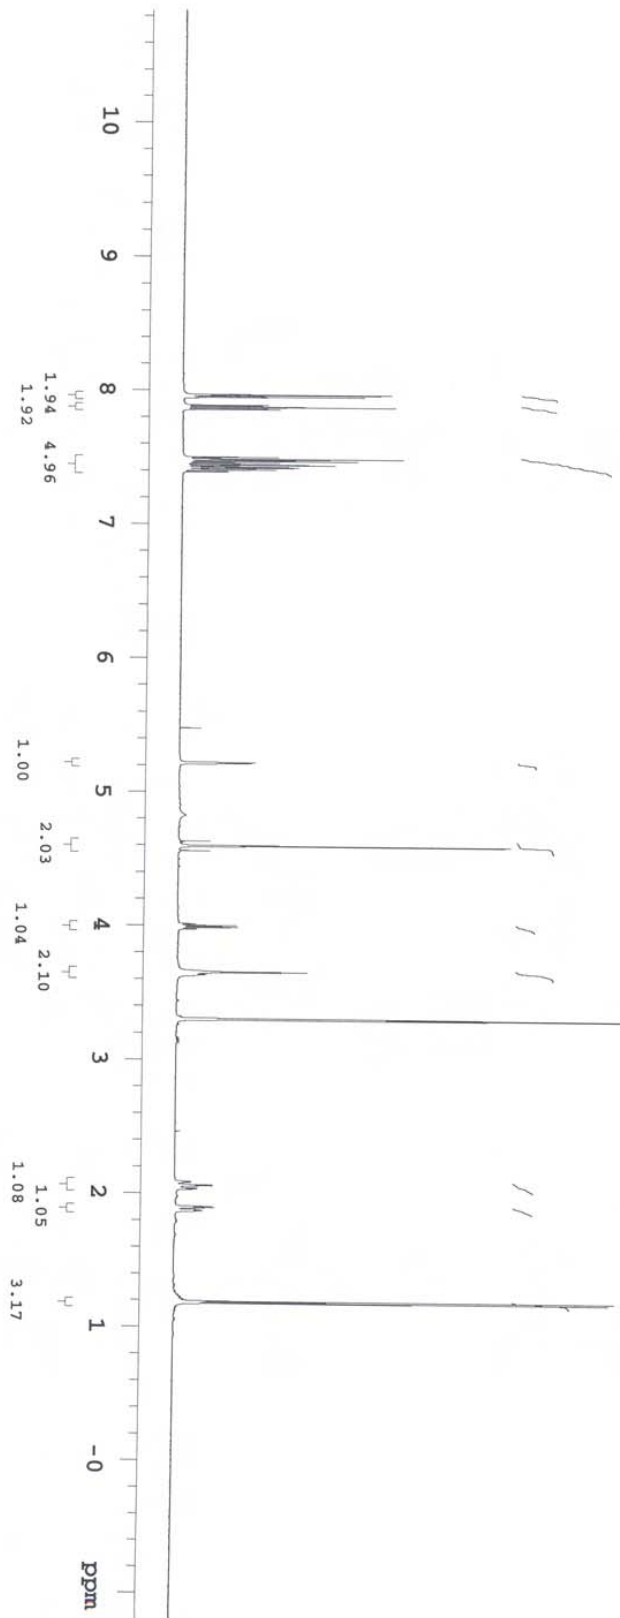

SW-03-163  
125 MHz APT in CD3OD (ref. to CD3OD @ 49.0 ppm), temp 27.2 C -> actual temp = 27.0 C, sw probe  
Date: 2015-03-31 11:14:12, file: /mnt/d600/home9/clinmr/mrdata/wei.shi/Project 1-book 3/101-208/sw-03-163-APT.fid  
Spectrometer: d601

Pulse Sequence: apt

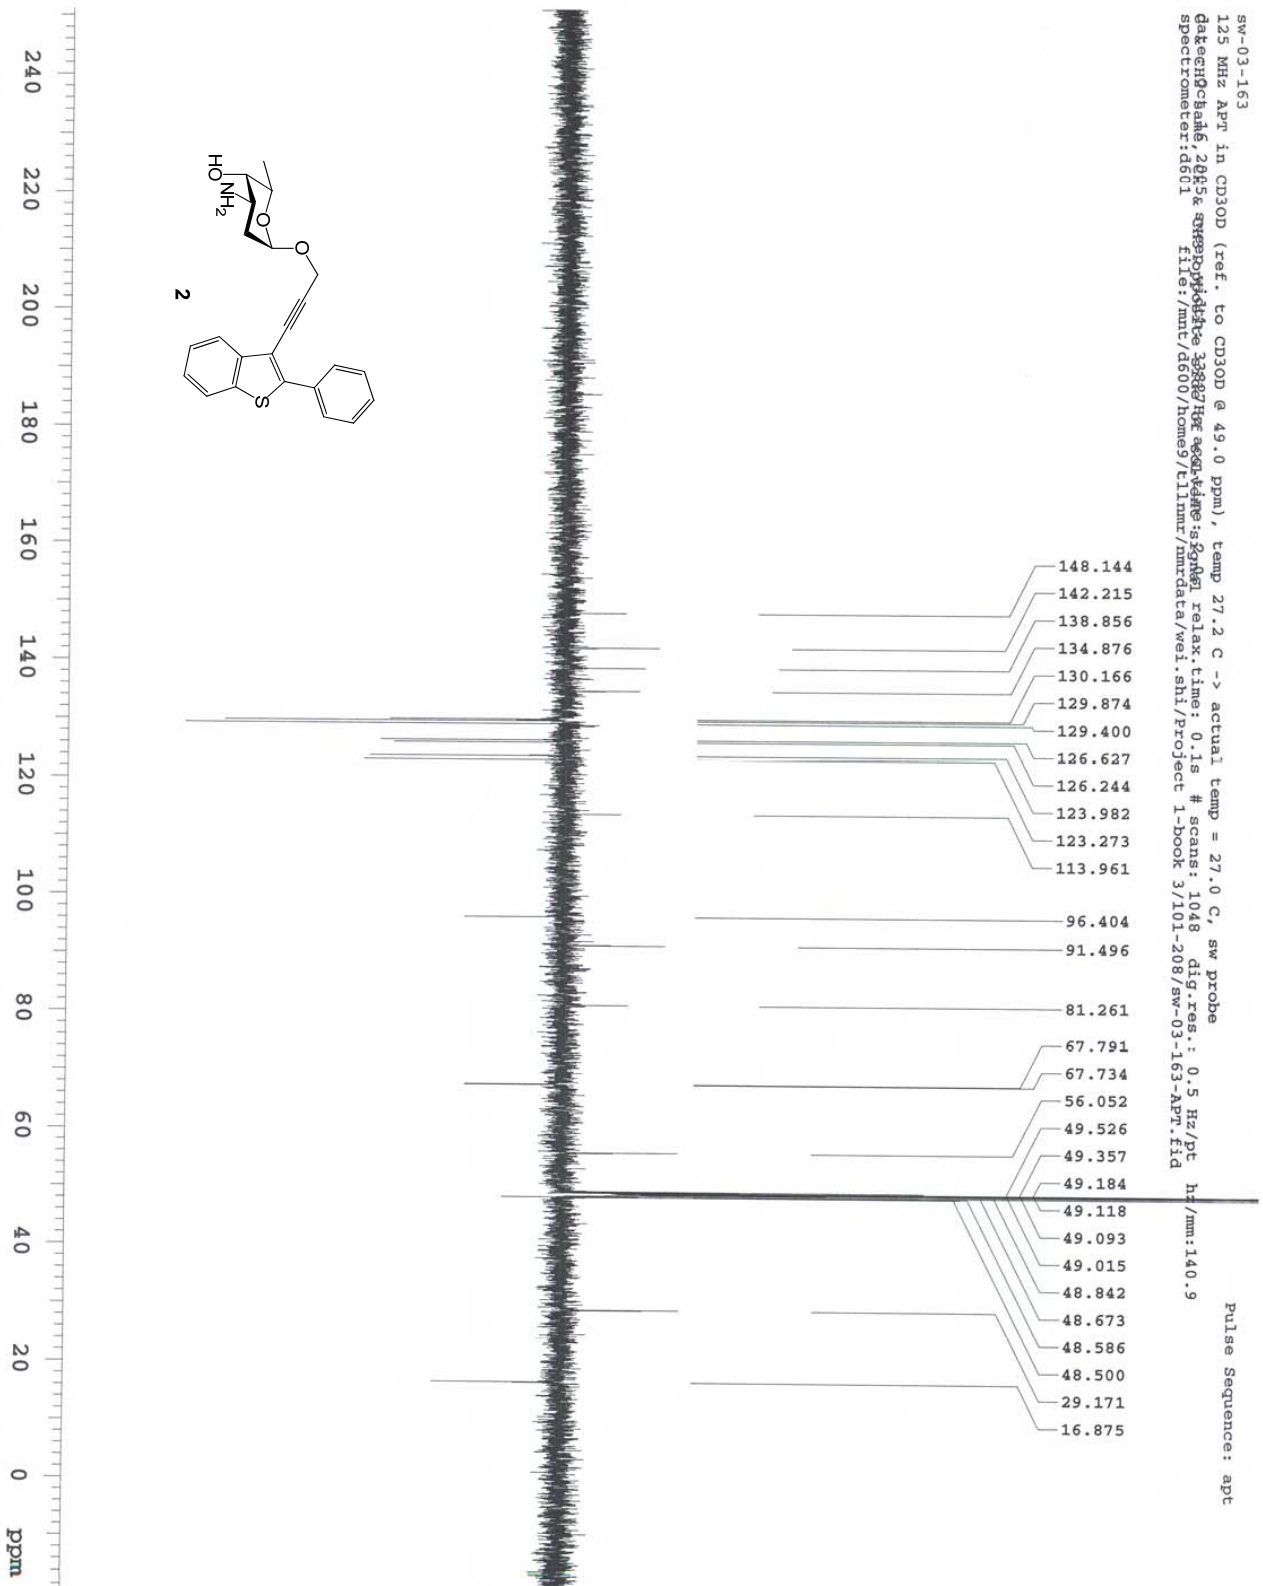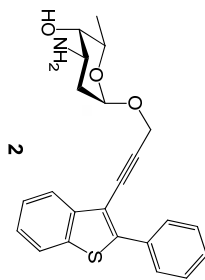

sw-03-171-After column and washed with aq. NH4Cl  
 500 MHz 1D in CD3OD (ref. to CD3OD @ 3.30 ppm), temp 27.2 C -> actual temp = 27.0 C, sw500 probe  
 date: Oct 23 2005 sweep width: 6001Hz acq.time: 2.0s relax.time: 3.0s # scans: 16 dig.res.: 0.1 Hz/pt hz/mm:25.0  
 spectrometer:d601 file:/mnt/d600/home9/clinmr/mmdatavwei.sh1/Project 1-book 3/101-208/sw-03-171.fid

Pulse Sequence: s2pu1

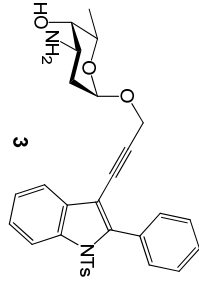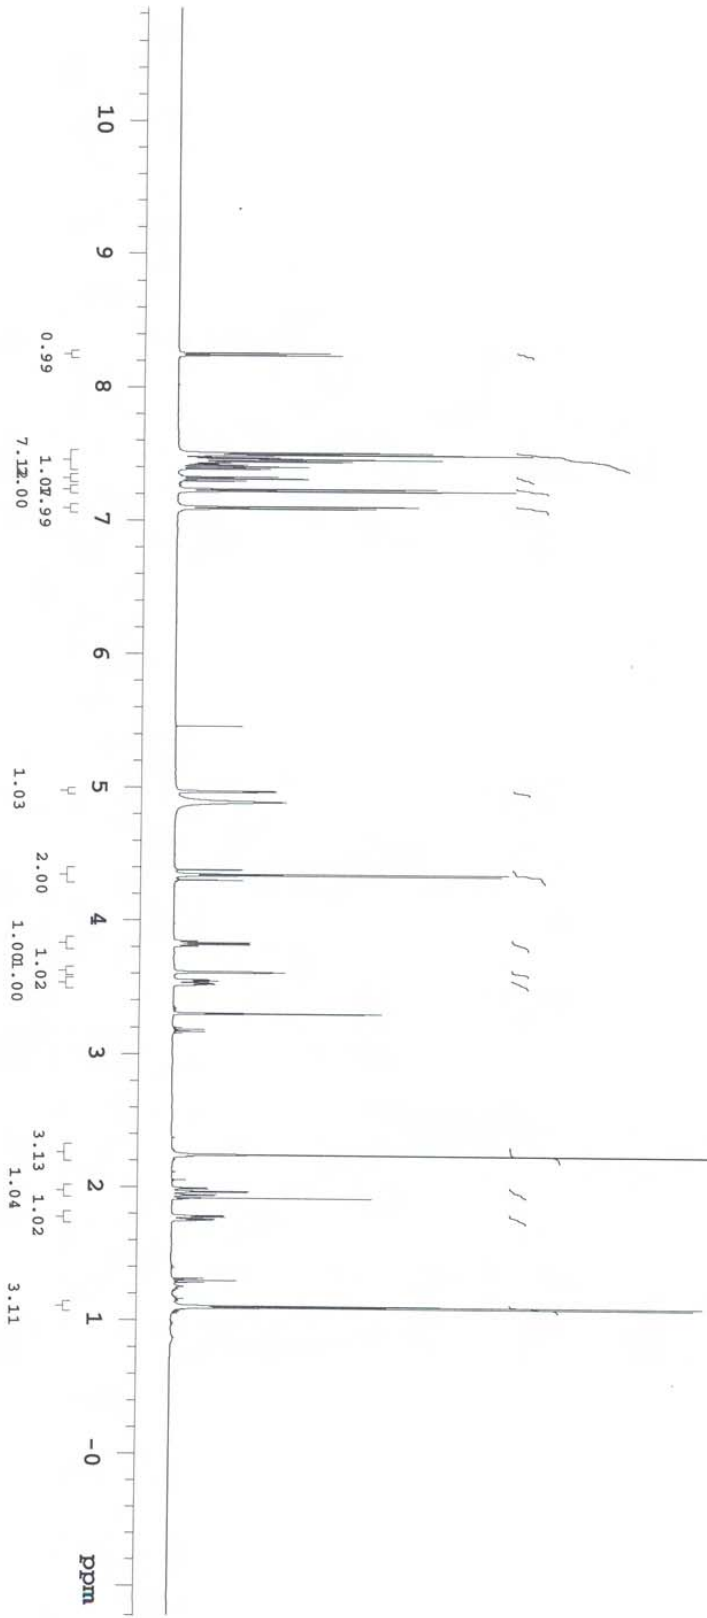



sw-03-171-After column and washed with aq. NH4Cl  
 125 MHz APY in CD3OD (ref. to CD3OD @ 49.0 ppm), temp 27.2 C -> actual temp = 27.0 C, sw probe  
 GPC/MS/MS, 2015-04-23 10:30:30, 33387, The actual value is given relax. time: 0.1s # scans: 312 dig.res.: 0.5 Hz/pt hz/mm: 140.9  
 File: mtc/d600/home3/clinmr/nmrdata/wai.shi/Project\_1-book 3/101-208/sw-03-171-APY.fid  
 Spectrometer: d601

Pulse Sequence: apt

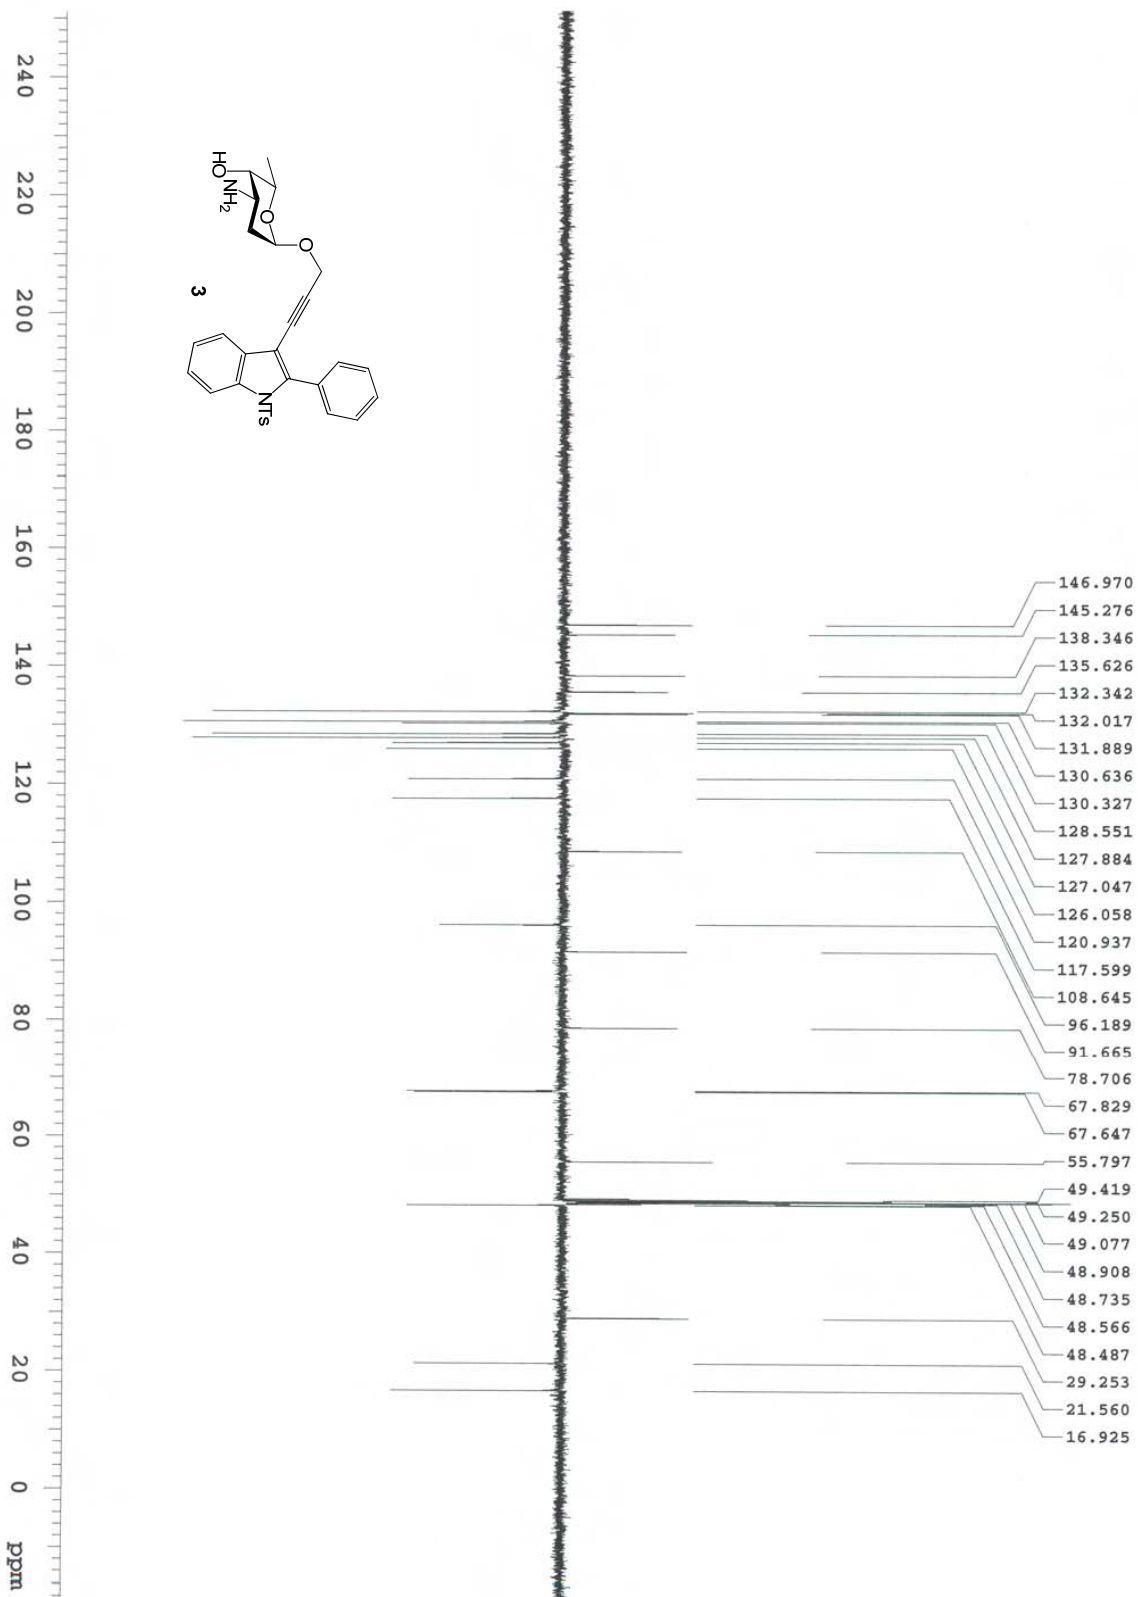

sw-04-197-Fraction 23-24  
 500 MHz 1D in CD3OD (ref. to CD3OD @ 3.30 ppm), temp 27.2 C -> actual temp = 27.0 C, sw500 probe  
 date: Aug 25 2007 sweep width: 6001Hz acq.time: 3.0s relax.time: 2.0s # scans: 16 dig.res.: 0.1 Hz/pt hz/mm:25.0  
 spectrometer:d601 File:/mnt/d600/home9/ellimr/nmrdata/we1.shi/Project 1-book 4/100-208/sw-04-197-final.fid

Pulse Sequence: s2pu1

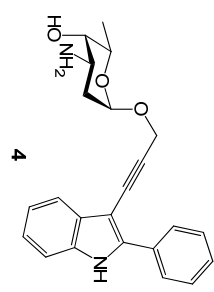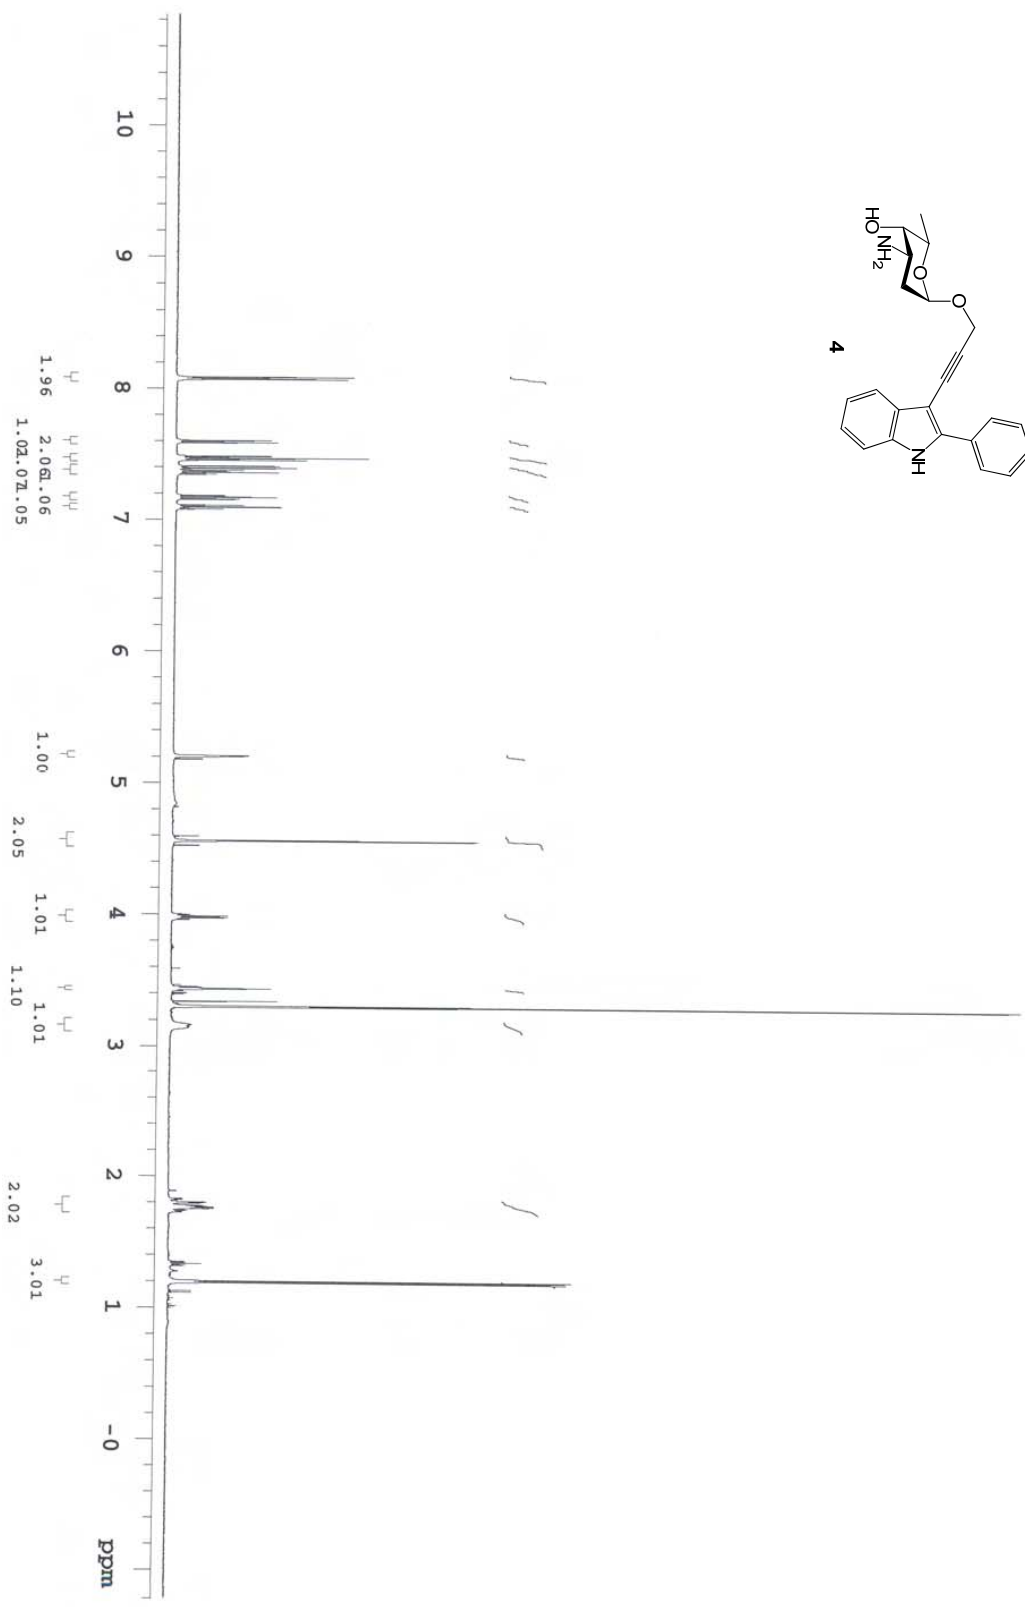

SW-04-197-fraction 23-24  
125 MHz APT in CD3OD (ref. to CD3OD @ 49.0 ppm), temp 27.2 C -> actual temp = 27.0 C, sw probe  
date: 2005-08-26, 20:07 & 20:09, file: 388297.appt, relax.time: 0.1s # scans: 1208 dig.res.: 0.5 Hz/pt hz/mm: 140.9  
spectrometer: d601 file: /mnt/d600/home9/clinmr/mrdava/wei.shi/Project 1-Book 4/100-208/sw-04-197-final1-APT.fid

Pulse Sequence: apt

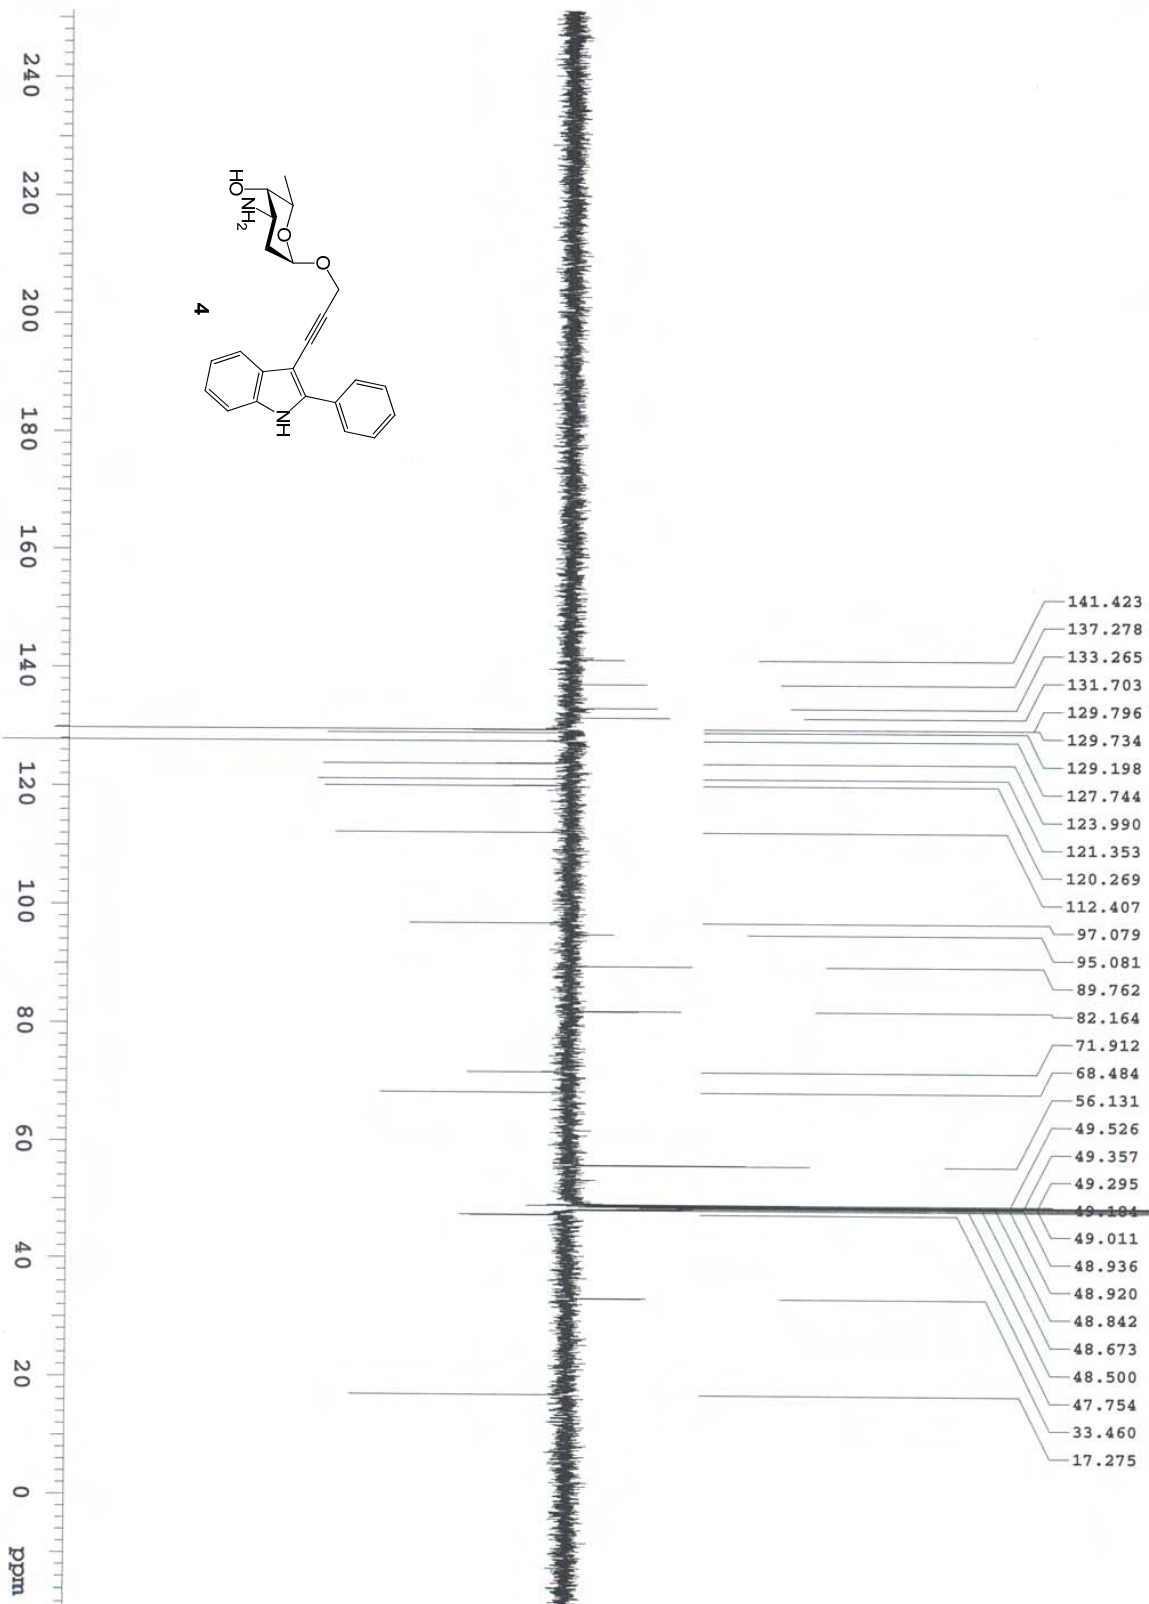

SW-02-177  
 500 MHz 1D in CD3OD (ref. to CD3OD @ 3.30 ppm), temp 27.2 C -> actual temp = 27.0 C, sw500 probe  
 date: Jan 30 2005 sweep width: 5006Hz acq.time: 2.05 relax.time: 3.05 # scans: 16 dig.res.: 0.1 Hz/pt hz/mm:20.9  
 spectrometer:d601 file:/cdrom/cdrom#6/151-184/sw-02-177.fid

Pulse Sequence: s2pu1

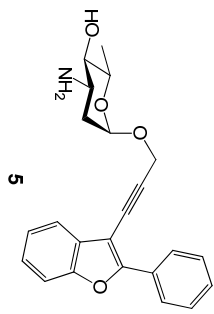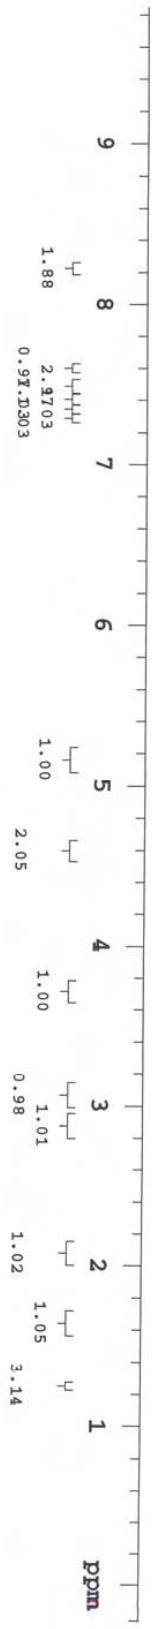

125 MHz APF in CD3OD (ref. to CD3OD @ 49.0 ppm), temp 27.2 C -> actual temp = 27.0 C, sw probe  
C & CH2 same, CH & CH3 opposite side of solvent signal  
date: Jan 30 2005 sweep width: 33827Hz acq.time: 2.0s relax.time: 0.1s # scans: 840 dig.res.: 0.5 Hz/pt hf/mm: 140.9  
spectrometer: d601 file: /cdrom/cdrom#6/151-184/sw-02-177-APF.fid

Pulse Sequence: apf

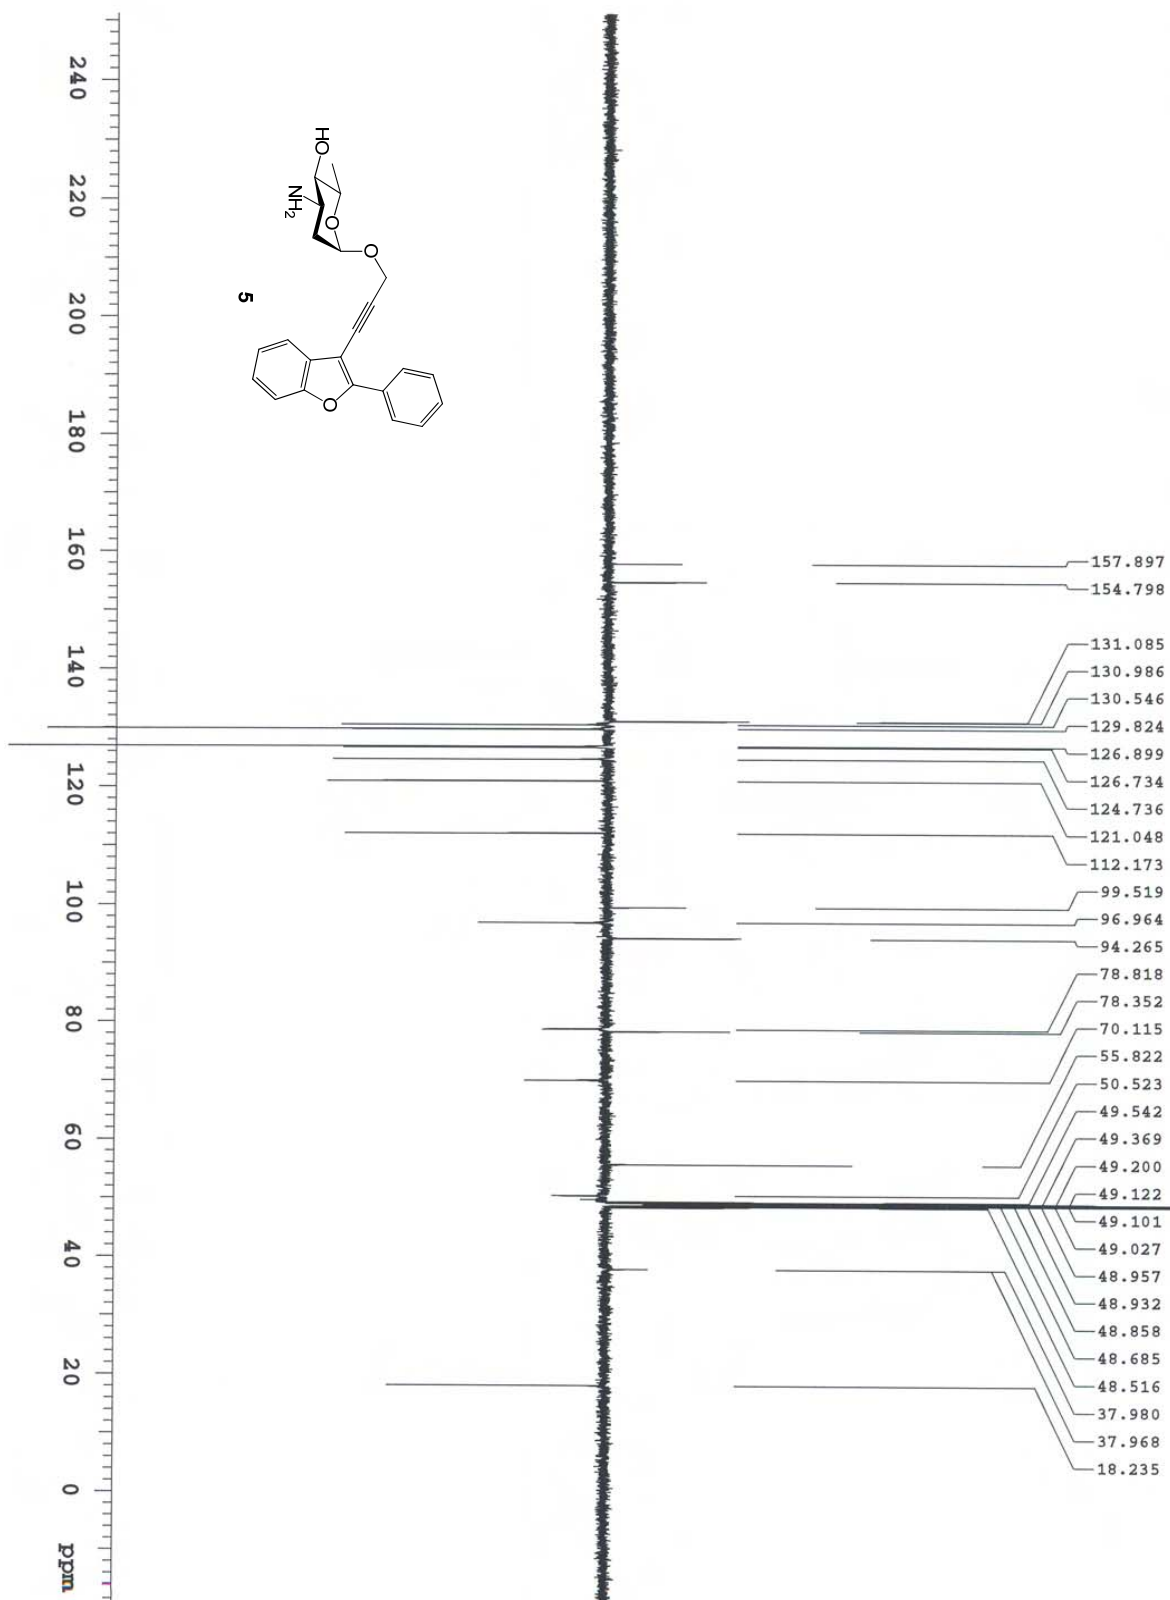

sw-03-159-High Vacuum 2 days after methanol evaporation  
 500 MHz ID in CD3OD (ref. to CD3OD @ 3.30 ppm), temp 27.2 C -> actual temp = 27.0 C, sw500 probe  
 date: Aug 12 2007 sweep width: 6001Hz acq.time: 3.0s relax.time: 2.0s # scans: 16 dig.res.: 0.1 Hz/gc hz/mm:25.0  
 spectrometer:d601 file:/mnt/d600/home9/ellimr/mrdata/wei.shi/Project 1-book 3/101-208/sw-03-159-1.FID

Pulse Sequence: s2pul

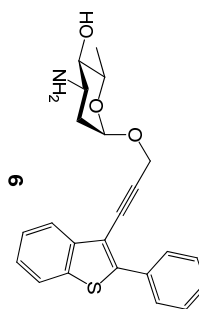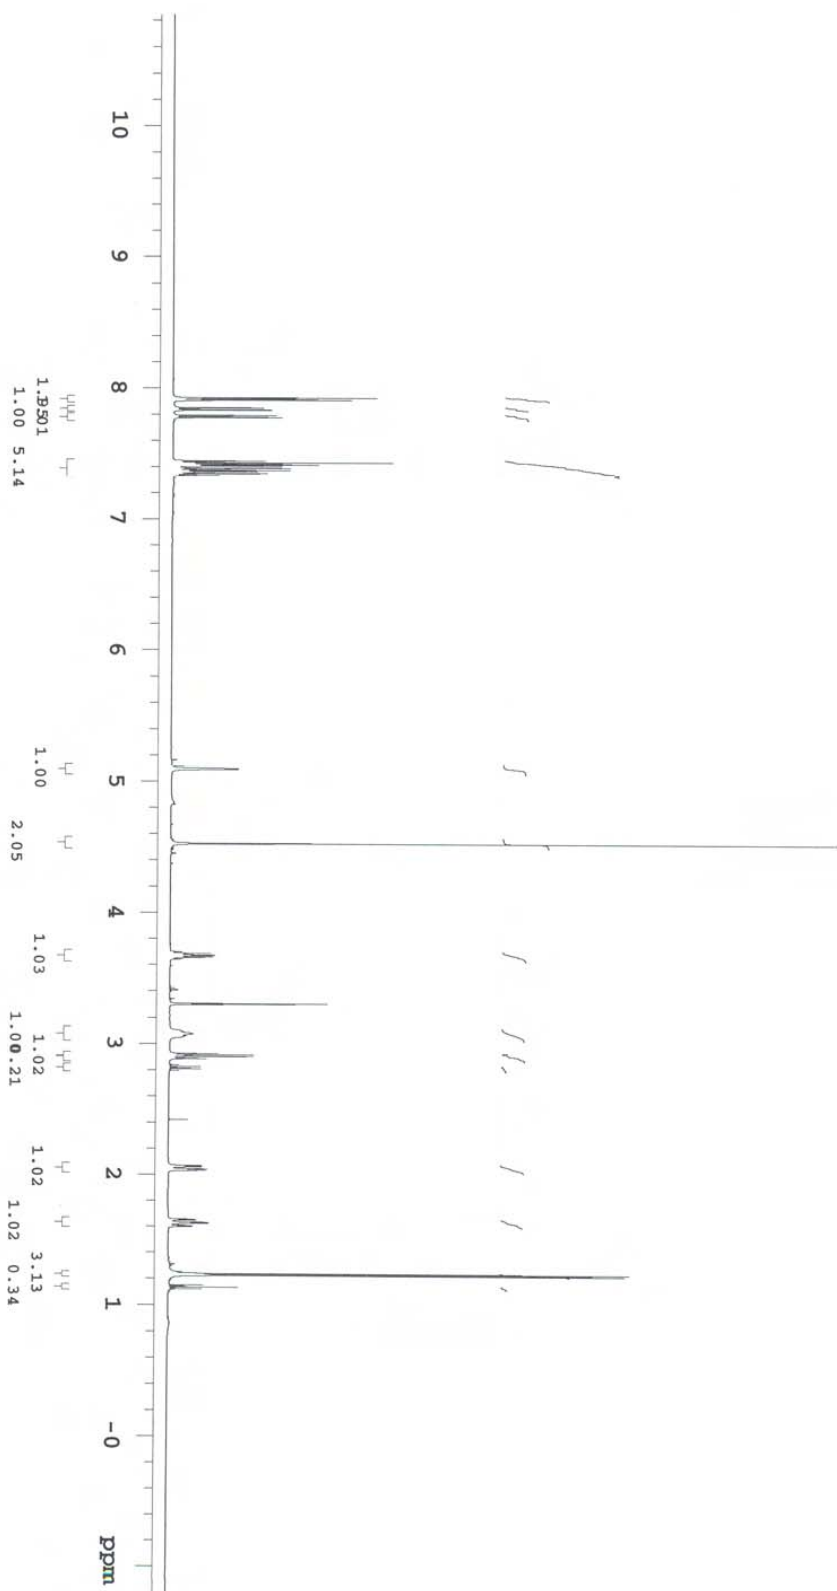

sw-03-159  
 125 MHz Apr in CD3OD (ref. to CD3OD @ 49.0 ppm), temp 27.2 C -> actual temp = 27.0 C, sw probe  
 Gakchugang2, 2007 & smpspjy04343e 33882 Hf e60144e s:Kjth1 relax. time: 0.1s # scans: 64 dig.res.: 0.5 Hz/pt hz/mm:140.9  
 Spectrometer:d601 File:/mnt/d600/home9/clinmr/nmrdata/wei.shi/Project 1-Book 3/101-208/sw-03-159-Apr-1.fid

Pulse Sequence: apt

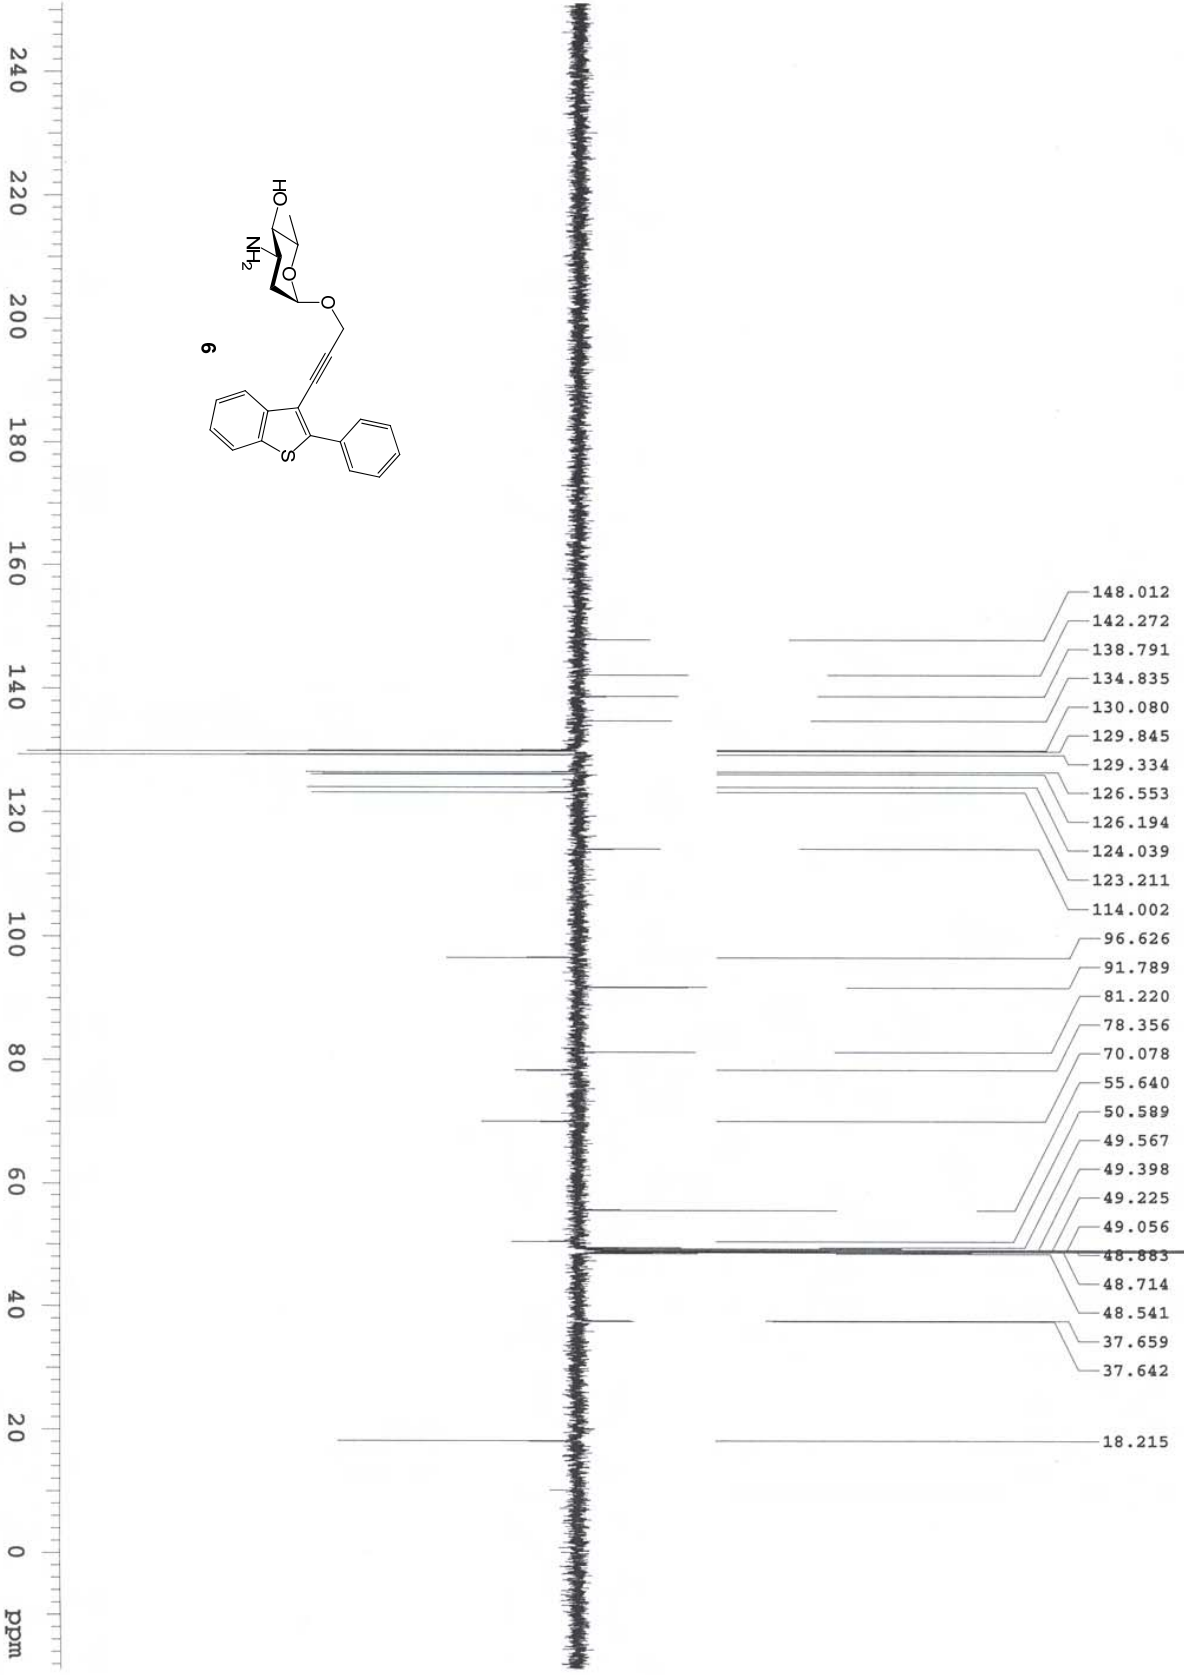

sw-03-167  
 500 MHz 1D in CD3OD (ref. to CD3OD @ 3.30 ppm), temp 27.2 C -> actual temp = 27.0 C, sw500 probe  
 date: Aug 19 2007 sweep width: 6001Hz acq time: 3.0s relax time: 2.0s # scans: 16 dig.res.: 0.1 Hz/pt hz/mm:25.0  
 spectrometer:d601 file:/mnt/d600/homes9/clinmr/hmrdata/wel.shi/Project 1-book 3/101-208/sw-03-167-final.fid

Pulse Sequence: s2pu1

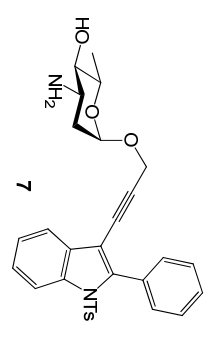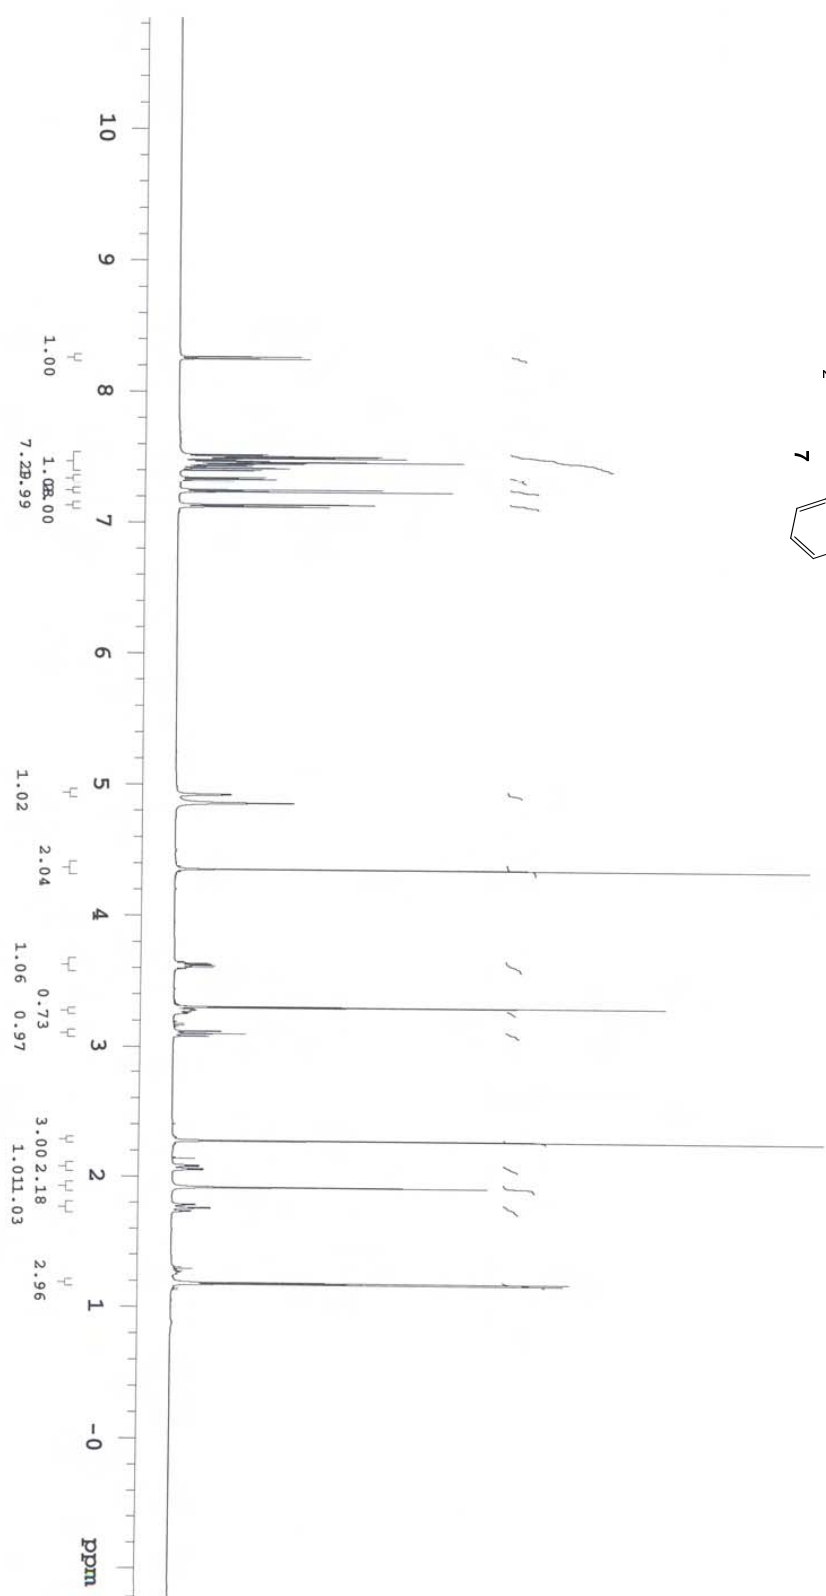



sw-03-167  
 125 MHz APPT in CD3OD (ref. to CD3OD @ 49.0 ppm), temp 27.2 C -> actual temp = 27.0 C, sw probe  
 dakeh8u8aah, 2017, 33887 Hz resolution: 3.2000 relax.time: 0.1s # scans: 448 dig.res.: 0.5 Hz/pt hf/mm: 140.9  
 spectrometer: d601 file: /mnt/d600/home9/tlinmr/murdata/wei.shi/Project 1-book 3/101-208/sw-03-167-final-APPT.fid

Pulse Sequence: apt

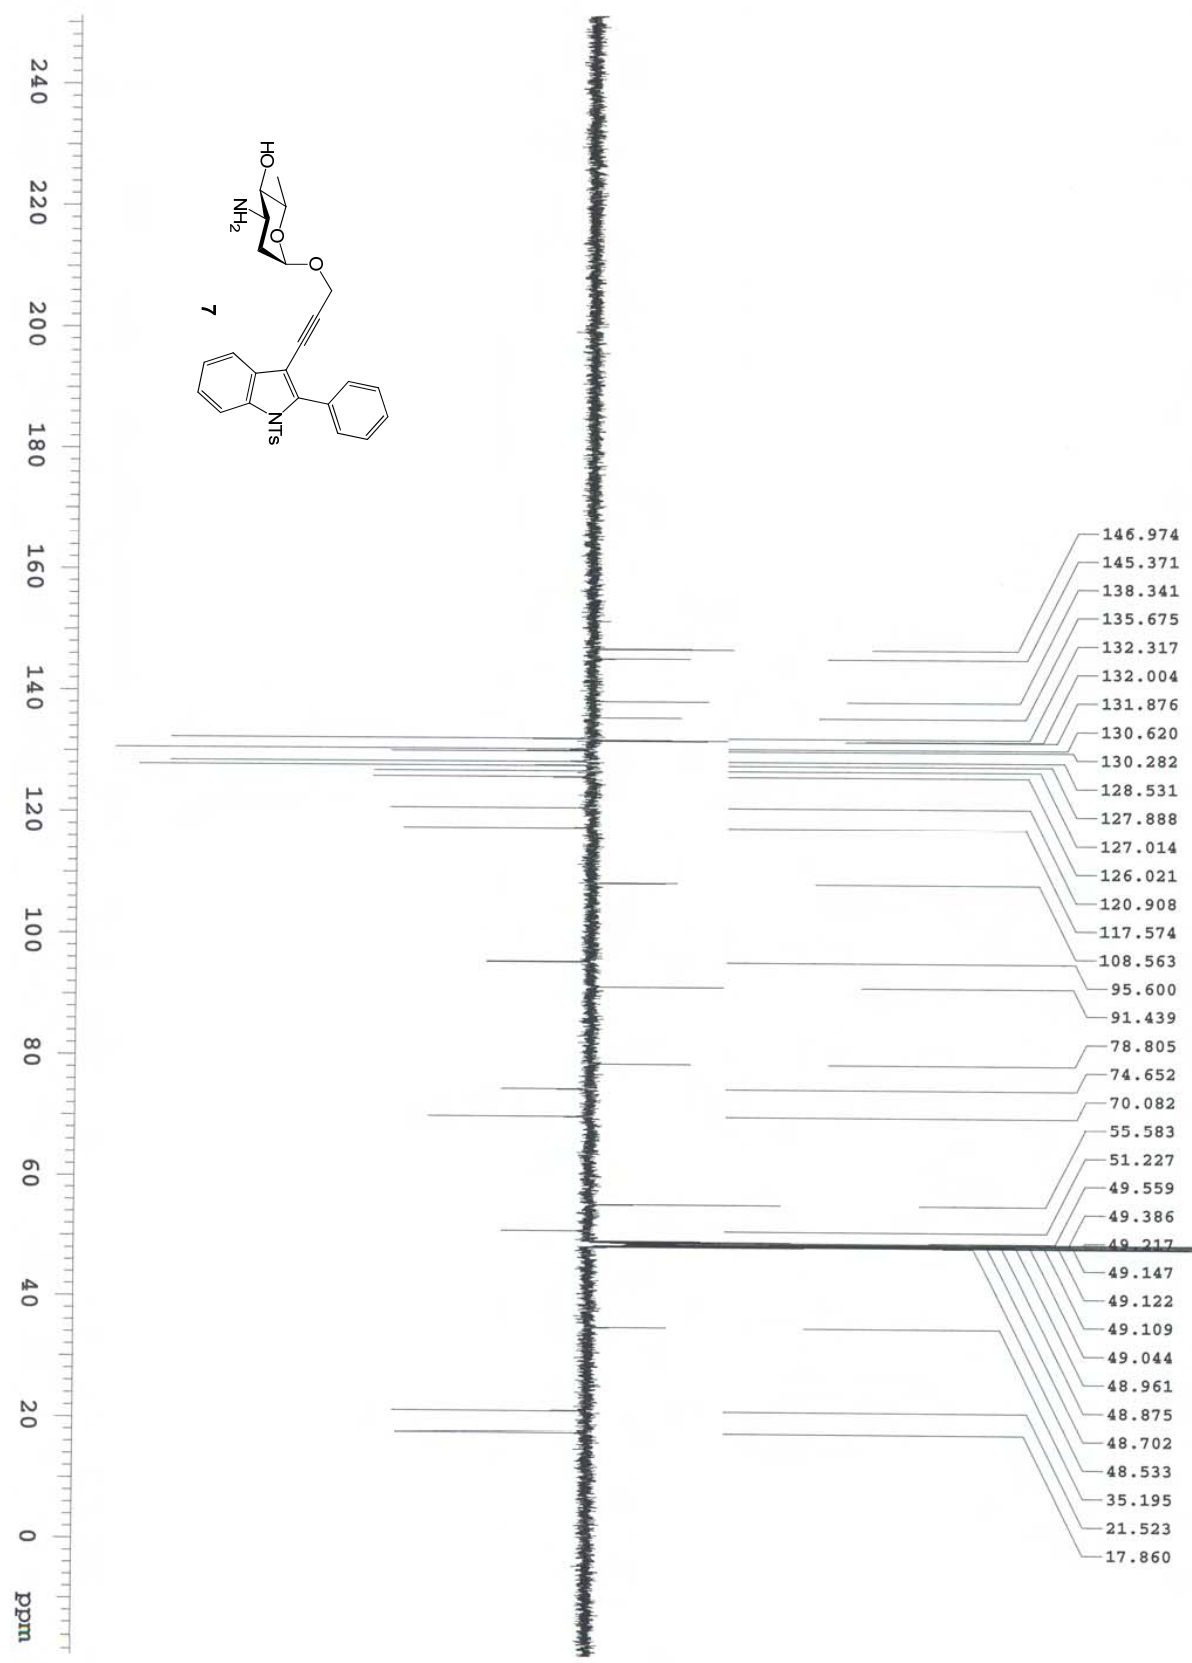

sw-04-199-final  
500 MHz 1D in CD3OD (ref. to CD3OD @ 3.30 ppm), temp 27.2 C -> actual temp = 27.0 C, sw500 probe  
date: Sep 9 2007 sweep width: 6001Hz acq.time: 3.0s relax.time: 2.0s # scans: 16 dig.res.: 0.1 Hz/pt hz/mm:25.0  
spectrometer:d601 file:/mnt/d600/home9/tlilmt/nmrdata/wel.shl/Project 1-book 4/100-208/sw-04-199-final.fid

Pulse Sequence: s2pul

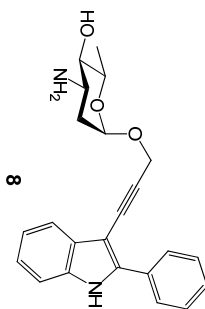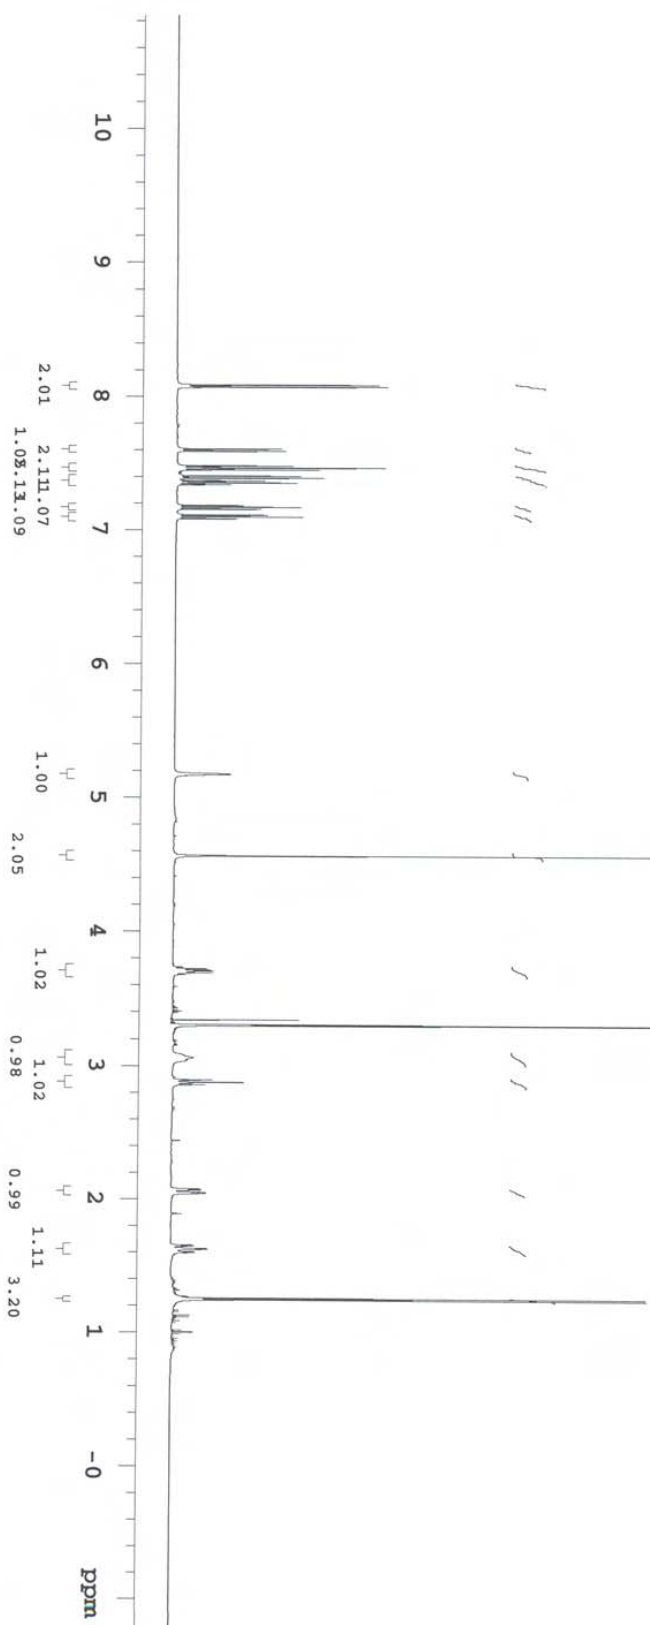

sw-04-199-final  
125 MHz APR in CD3OD (ref. to CD3OD @ 49.0 ppm), temp 27.2 C -> actual temp = 27.0 C, sw probe  
date: 2007-04-14 14:44:33, file: /mnt/d00/home9/clinmr/nmrdata/wel.shi/Project 1-Book 4/100-208/sw-04-199-final-APR.fid  
Spectrometer: d601  
File: /mnt/d00/home9/clinmr/nmrdata/wel.shi/Project 1-Book 4/100-208/sw-04-199-final-APR.fid

Pulse Sequence: apt

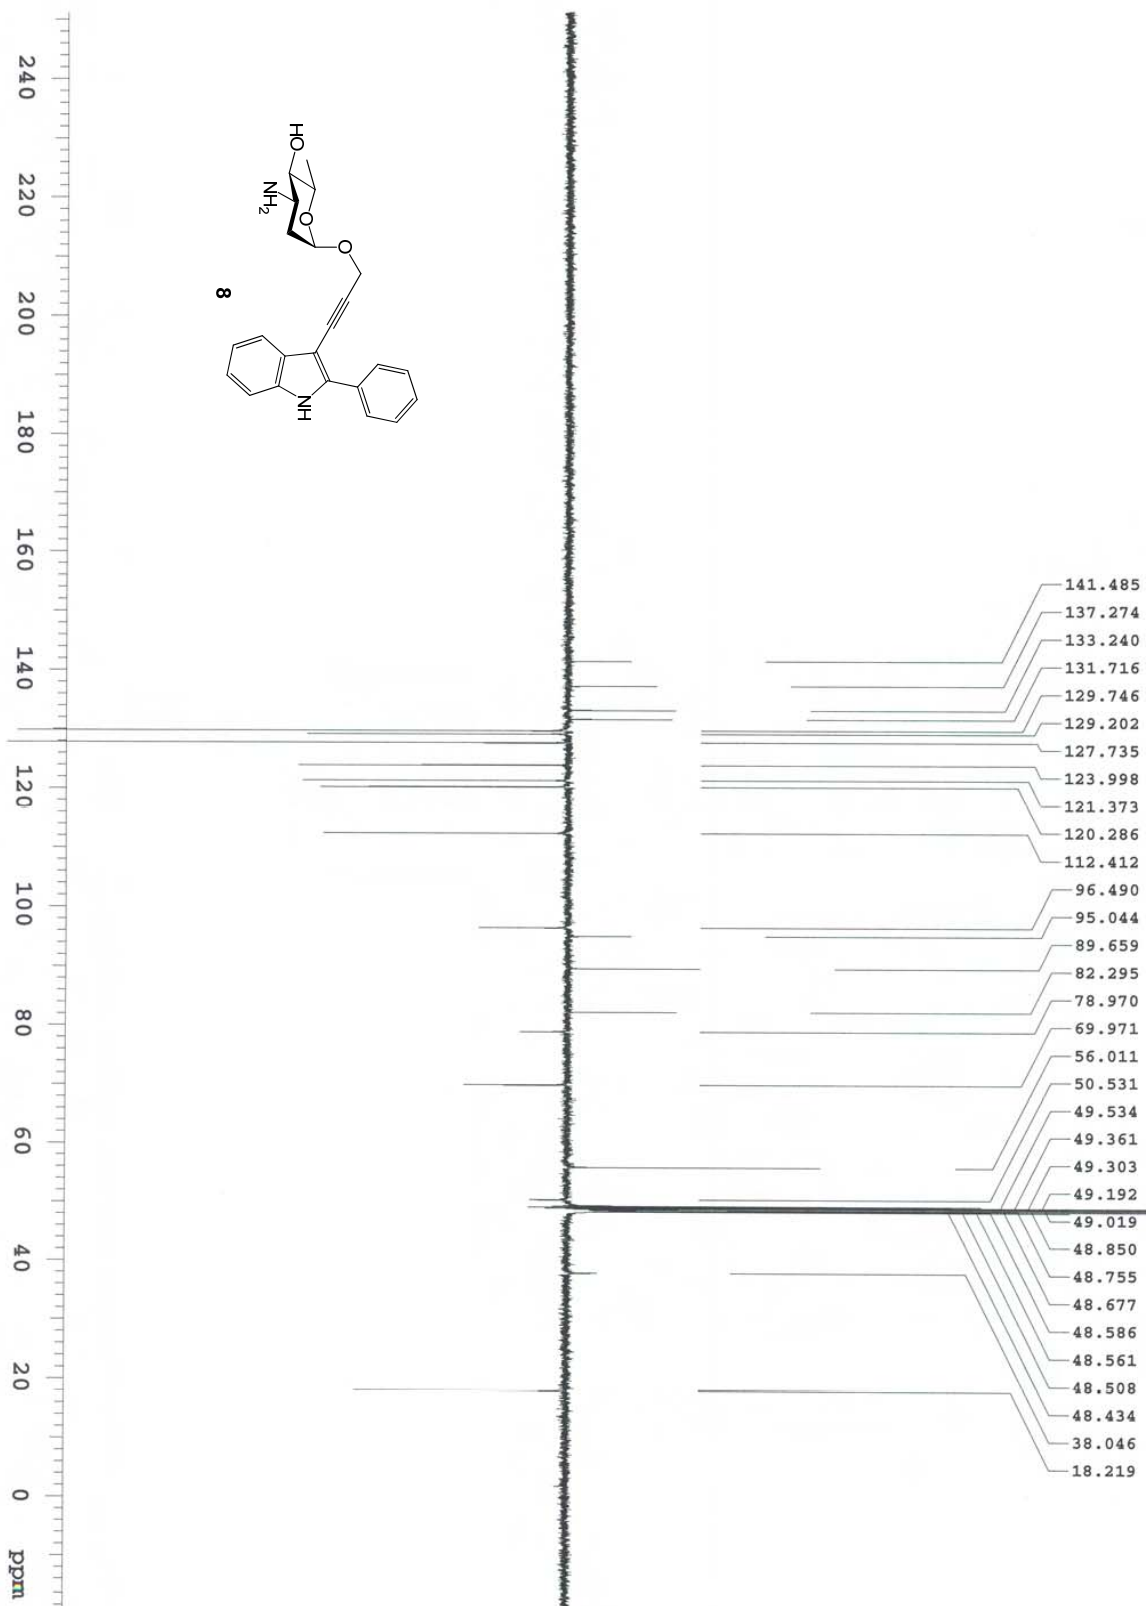

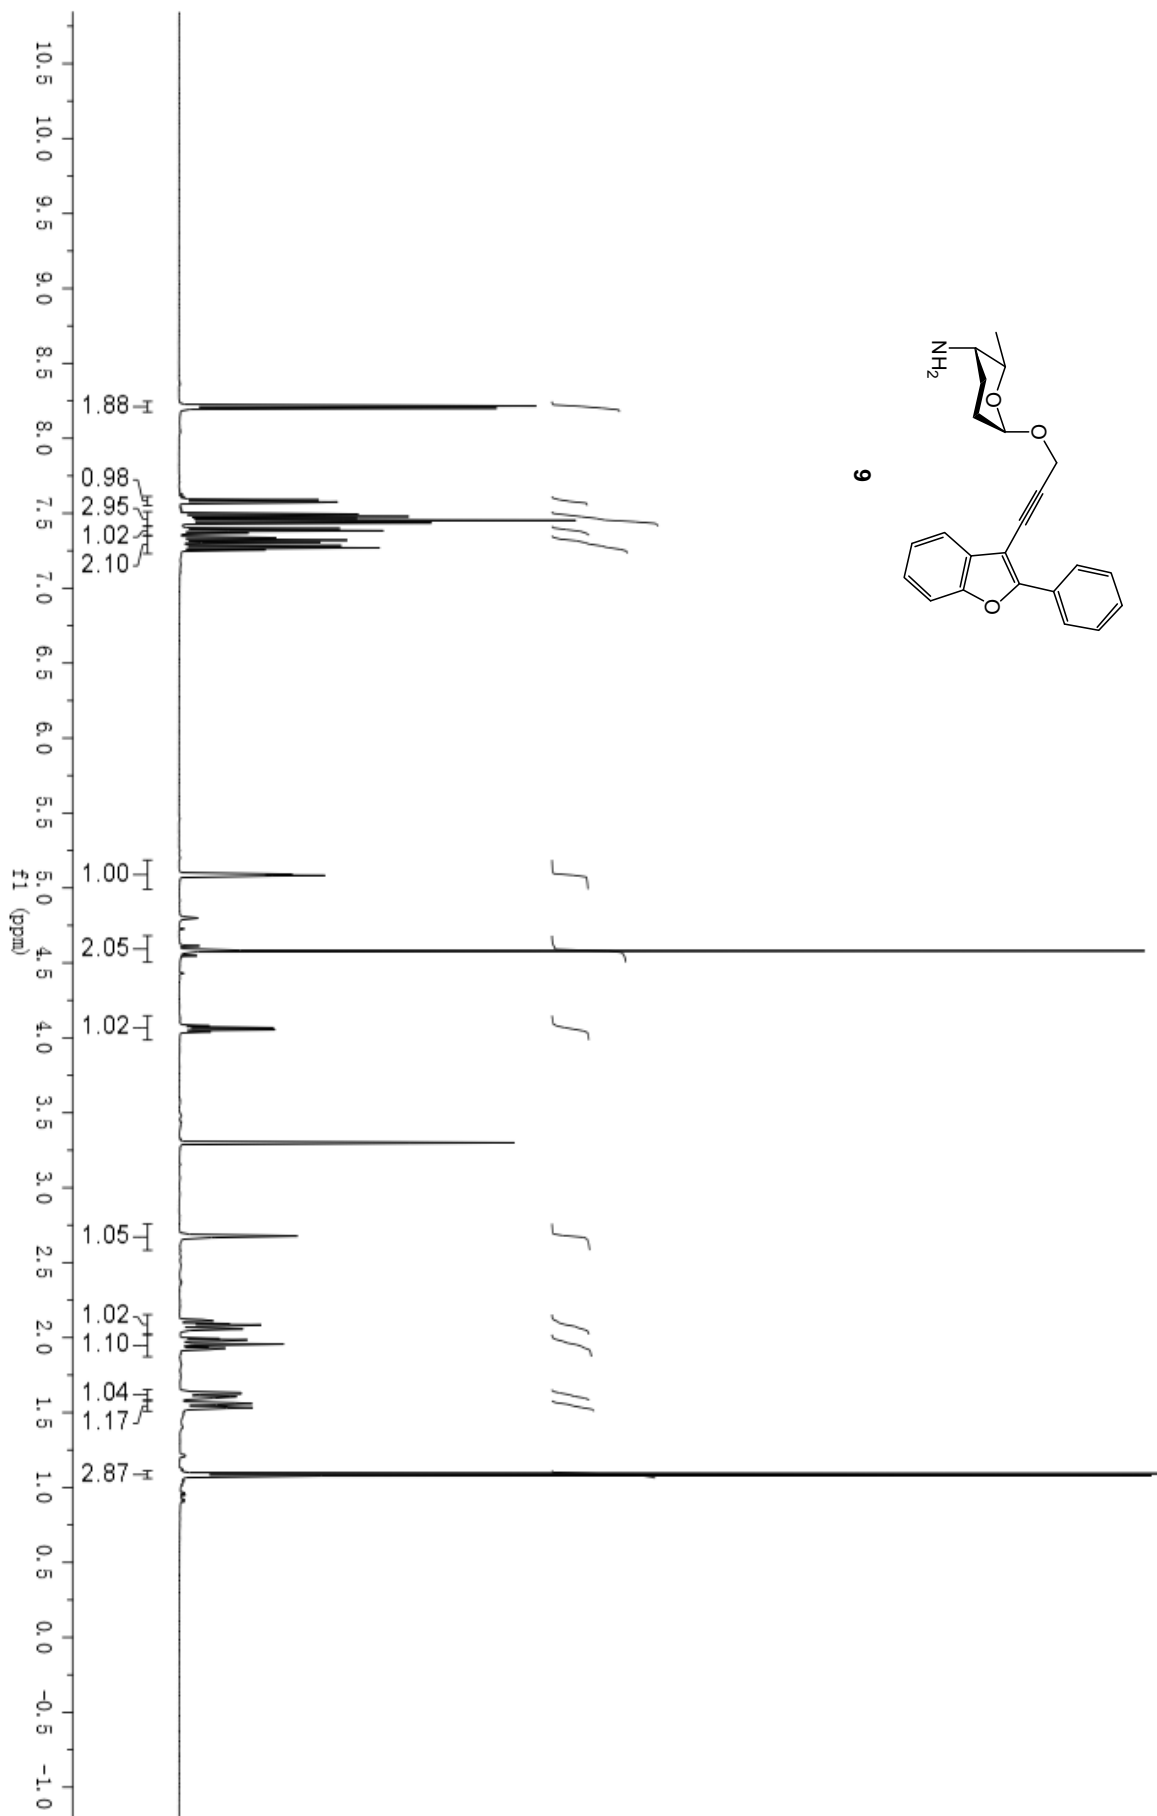

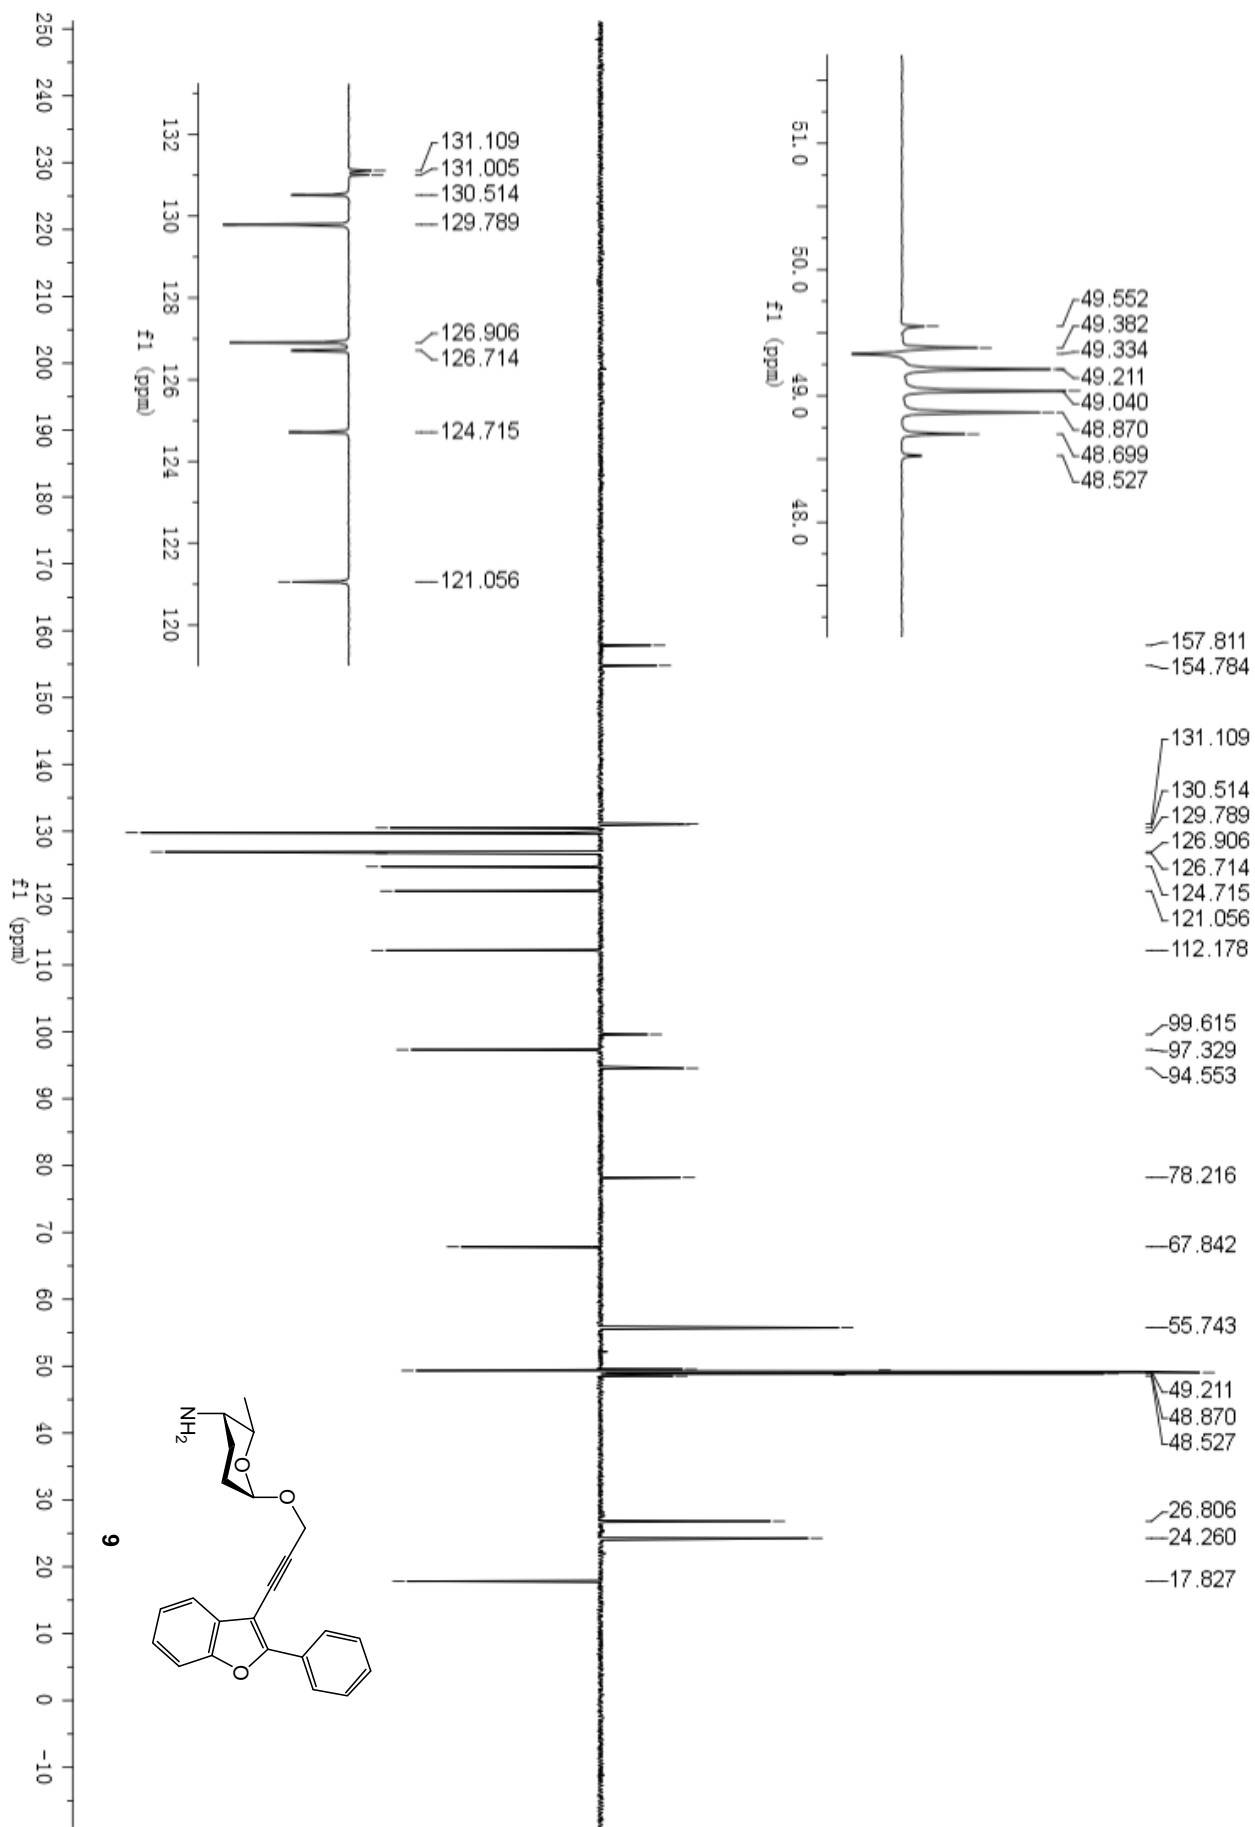

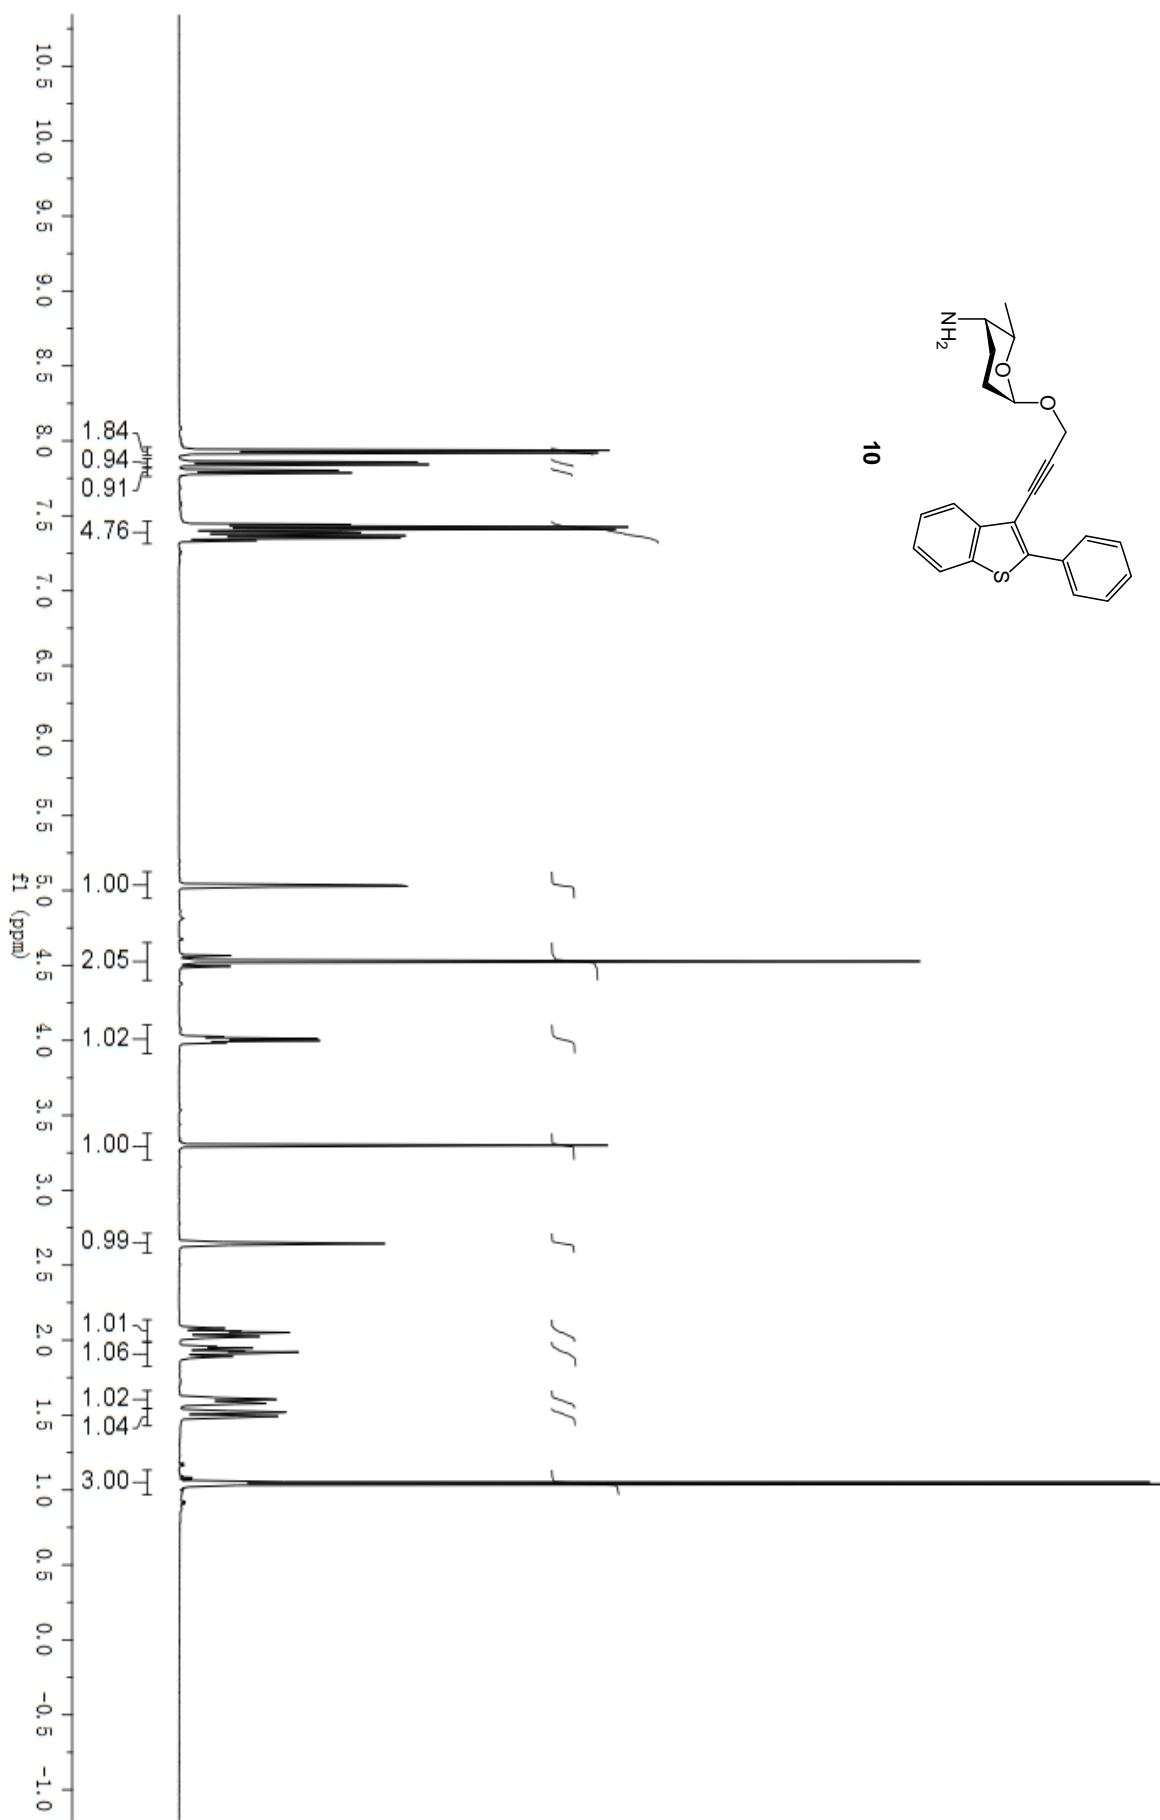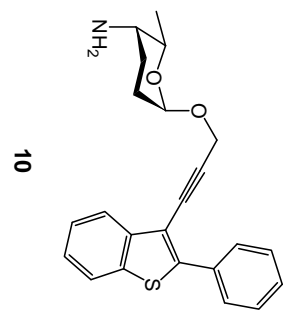

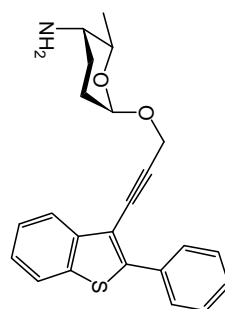

10

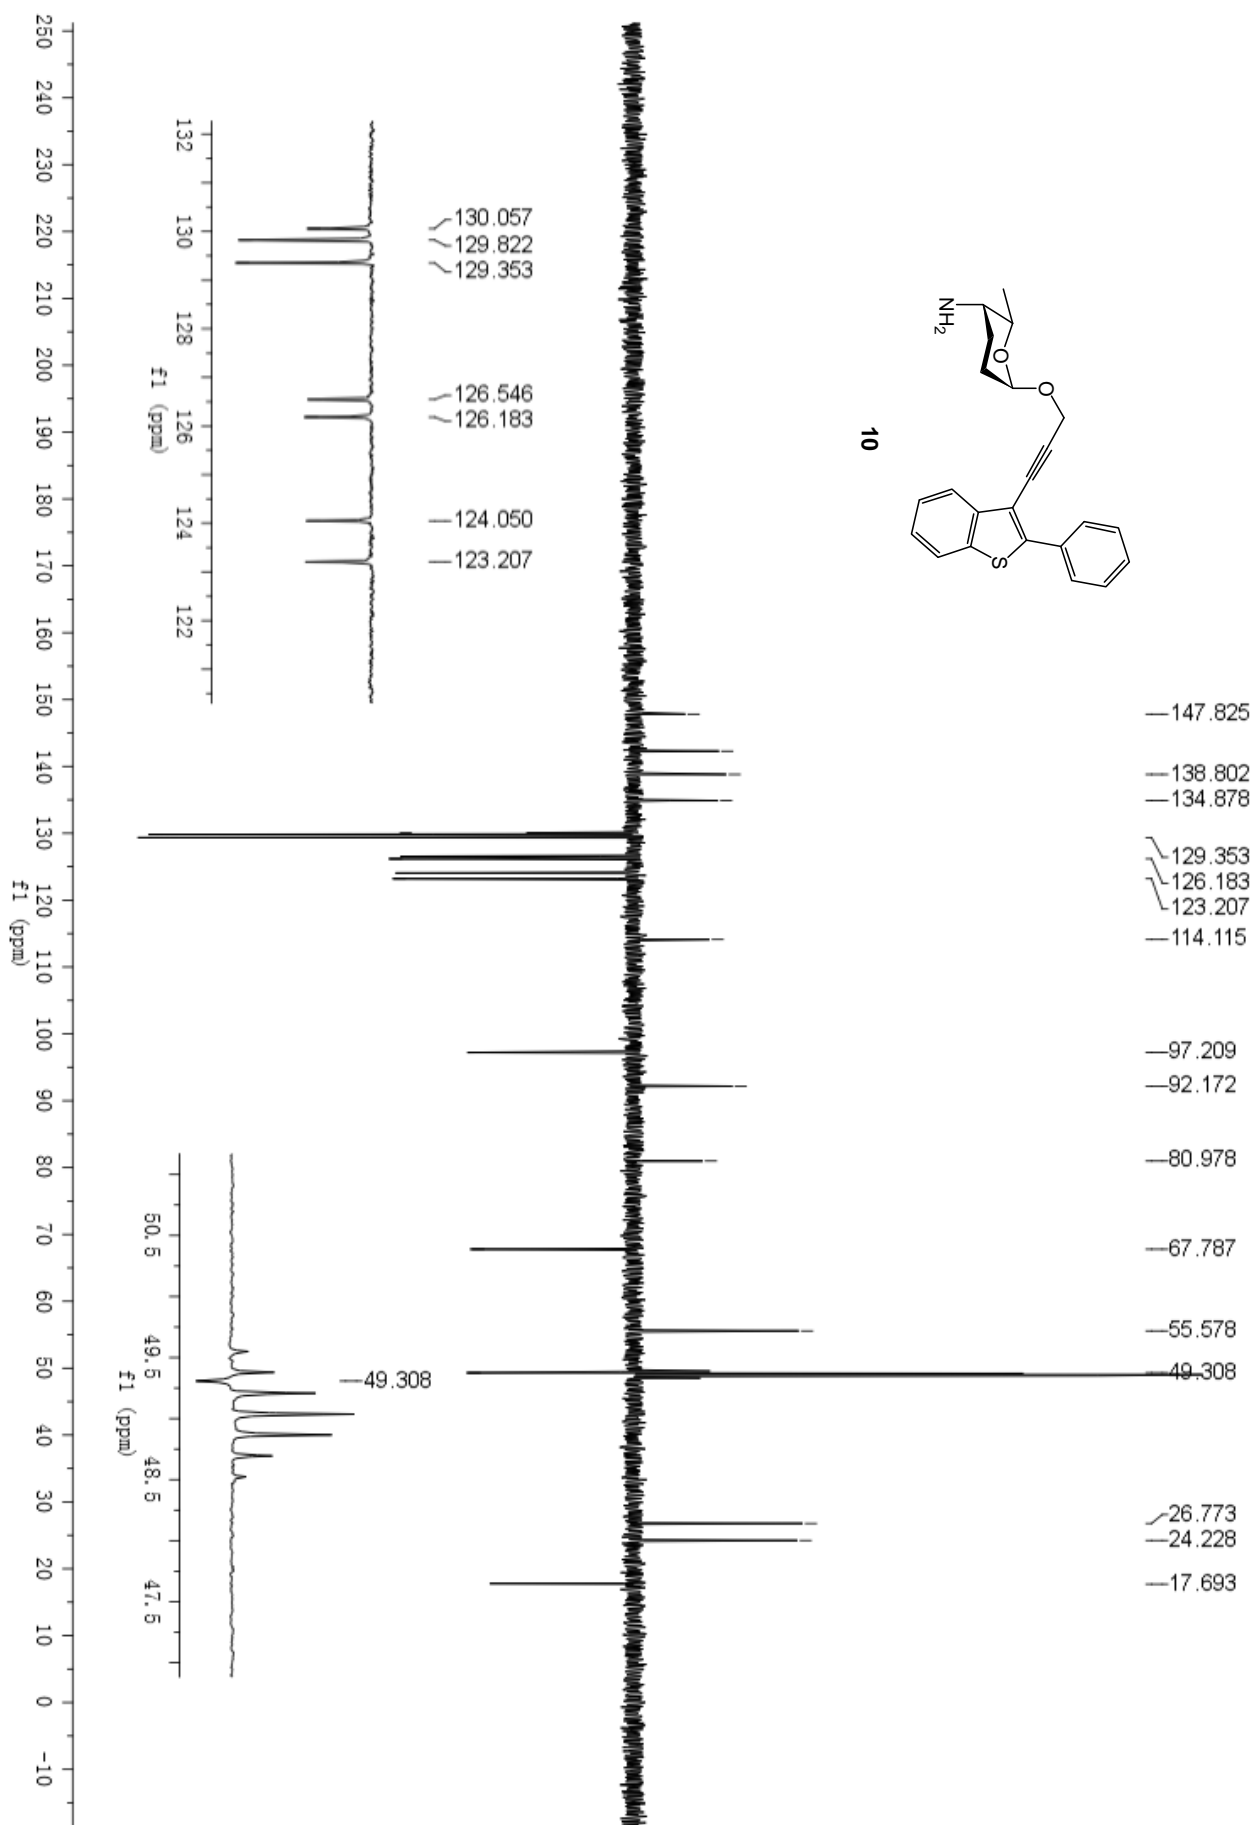

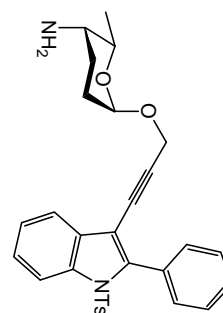

11

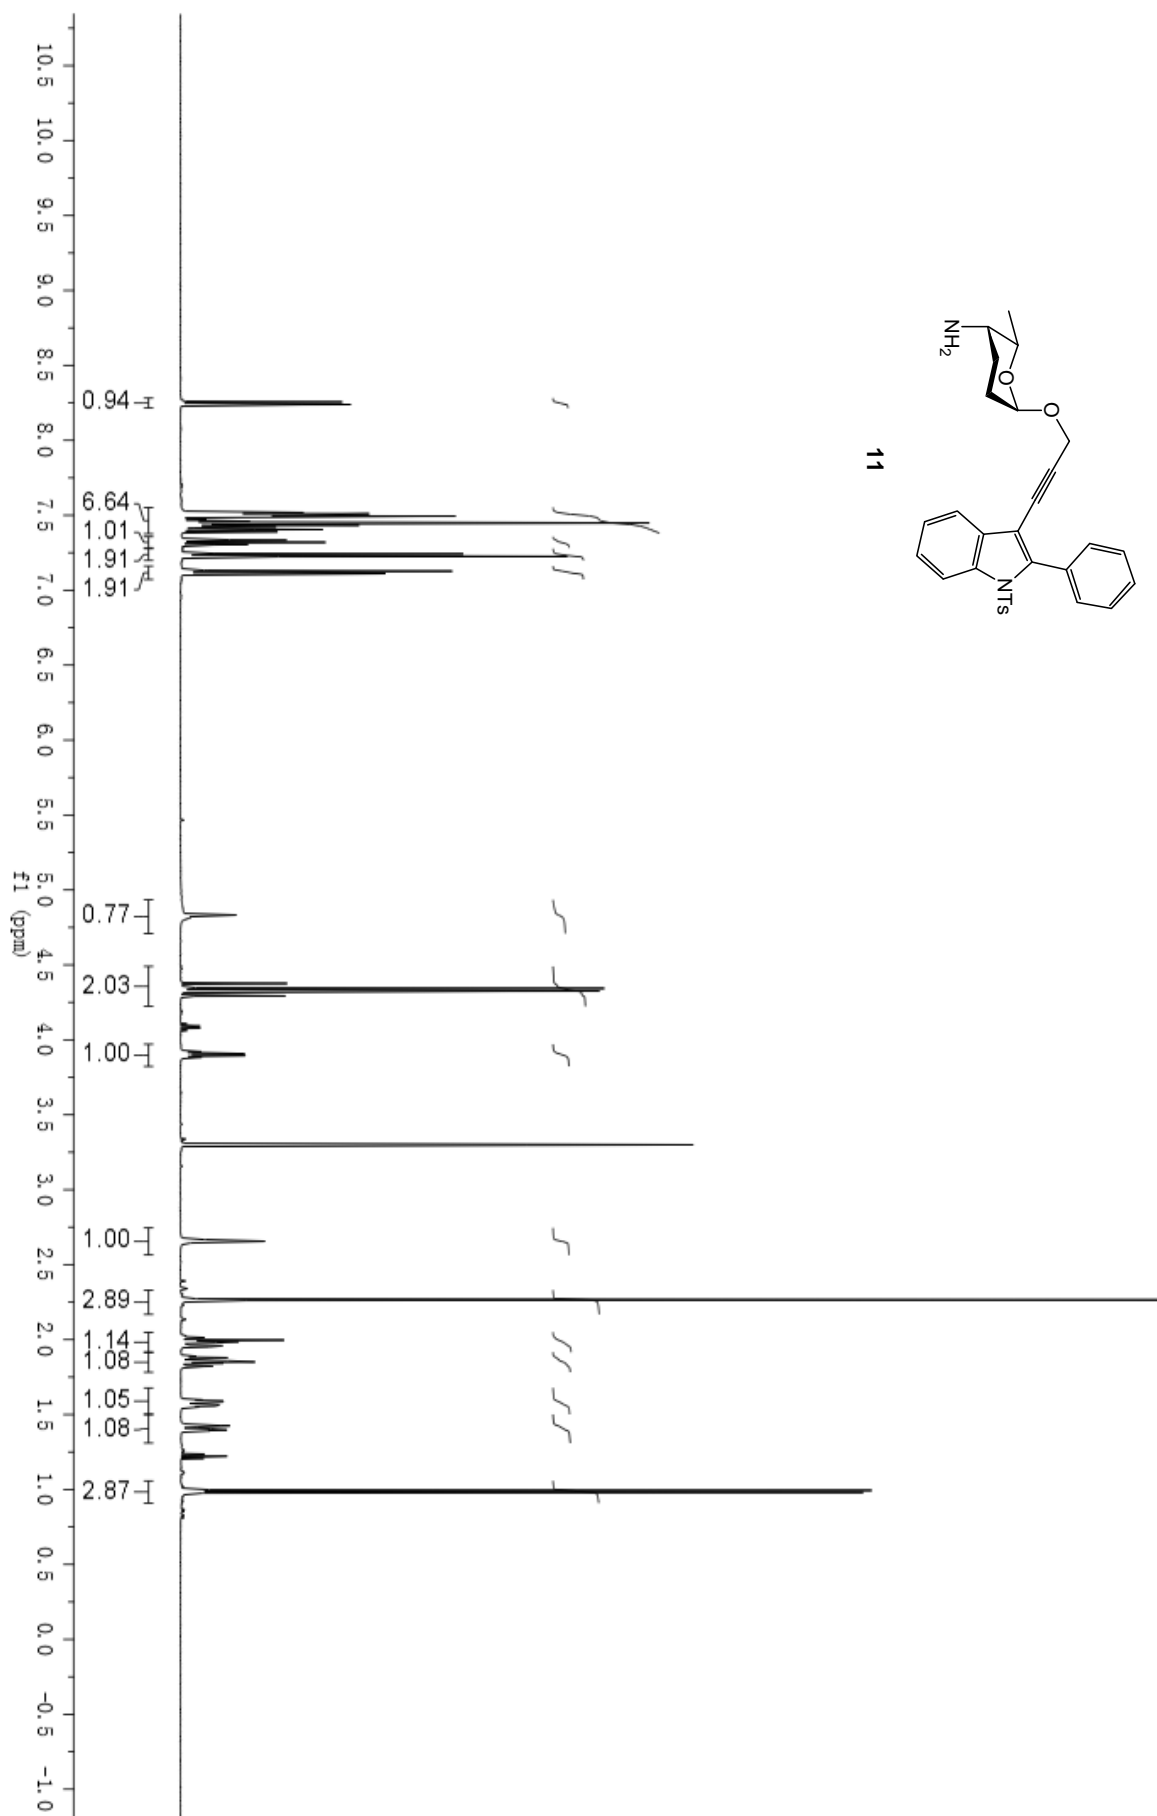



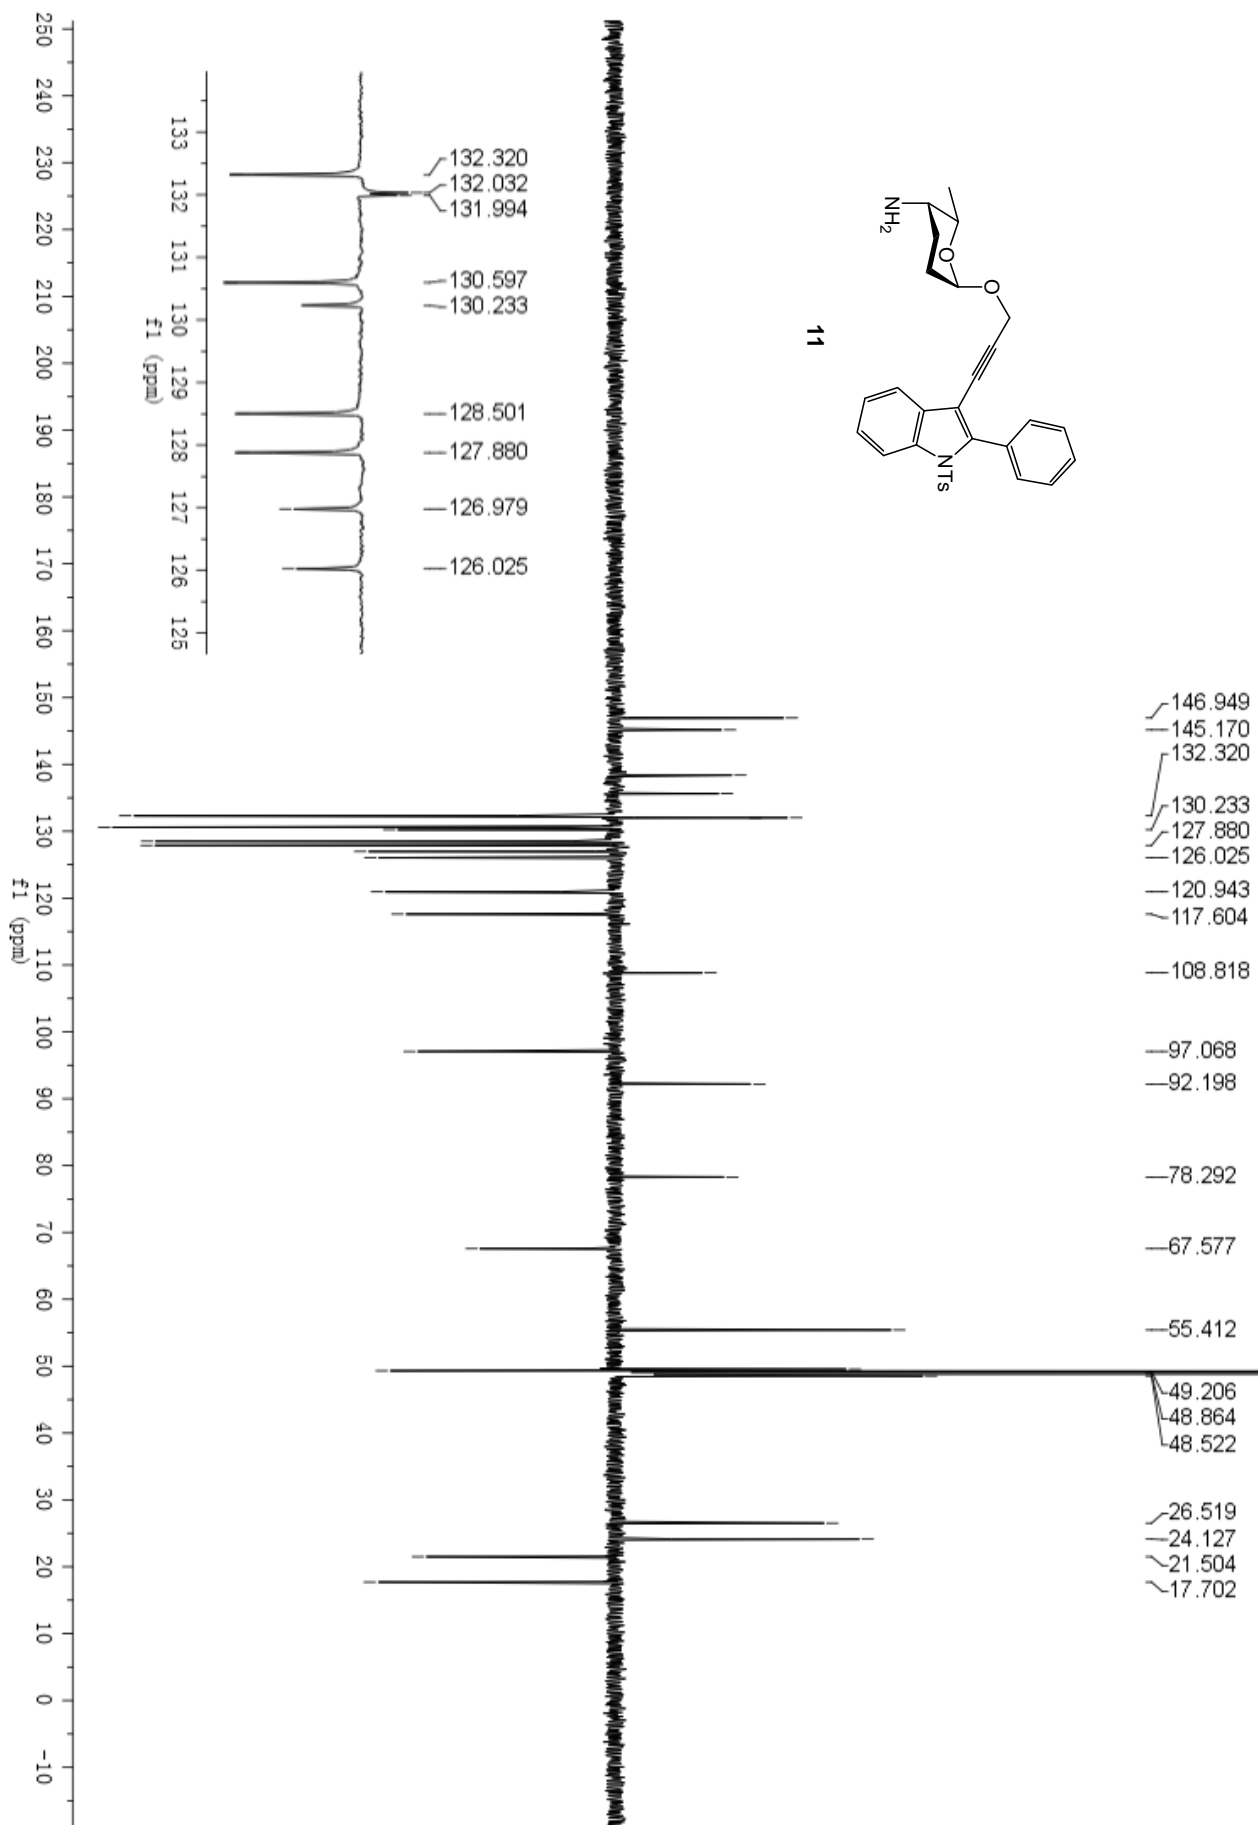

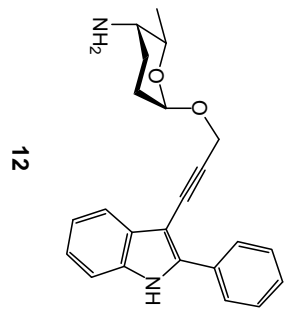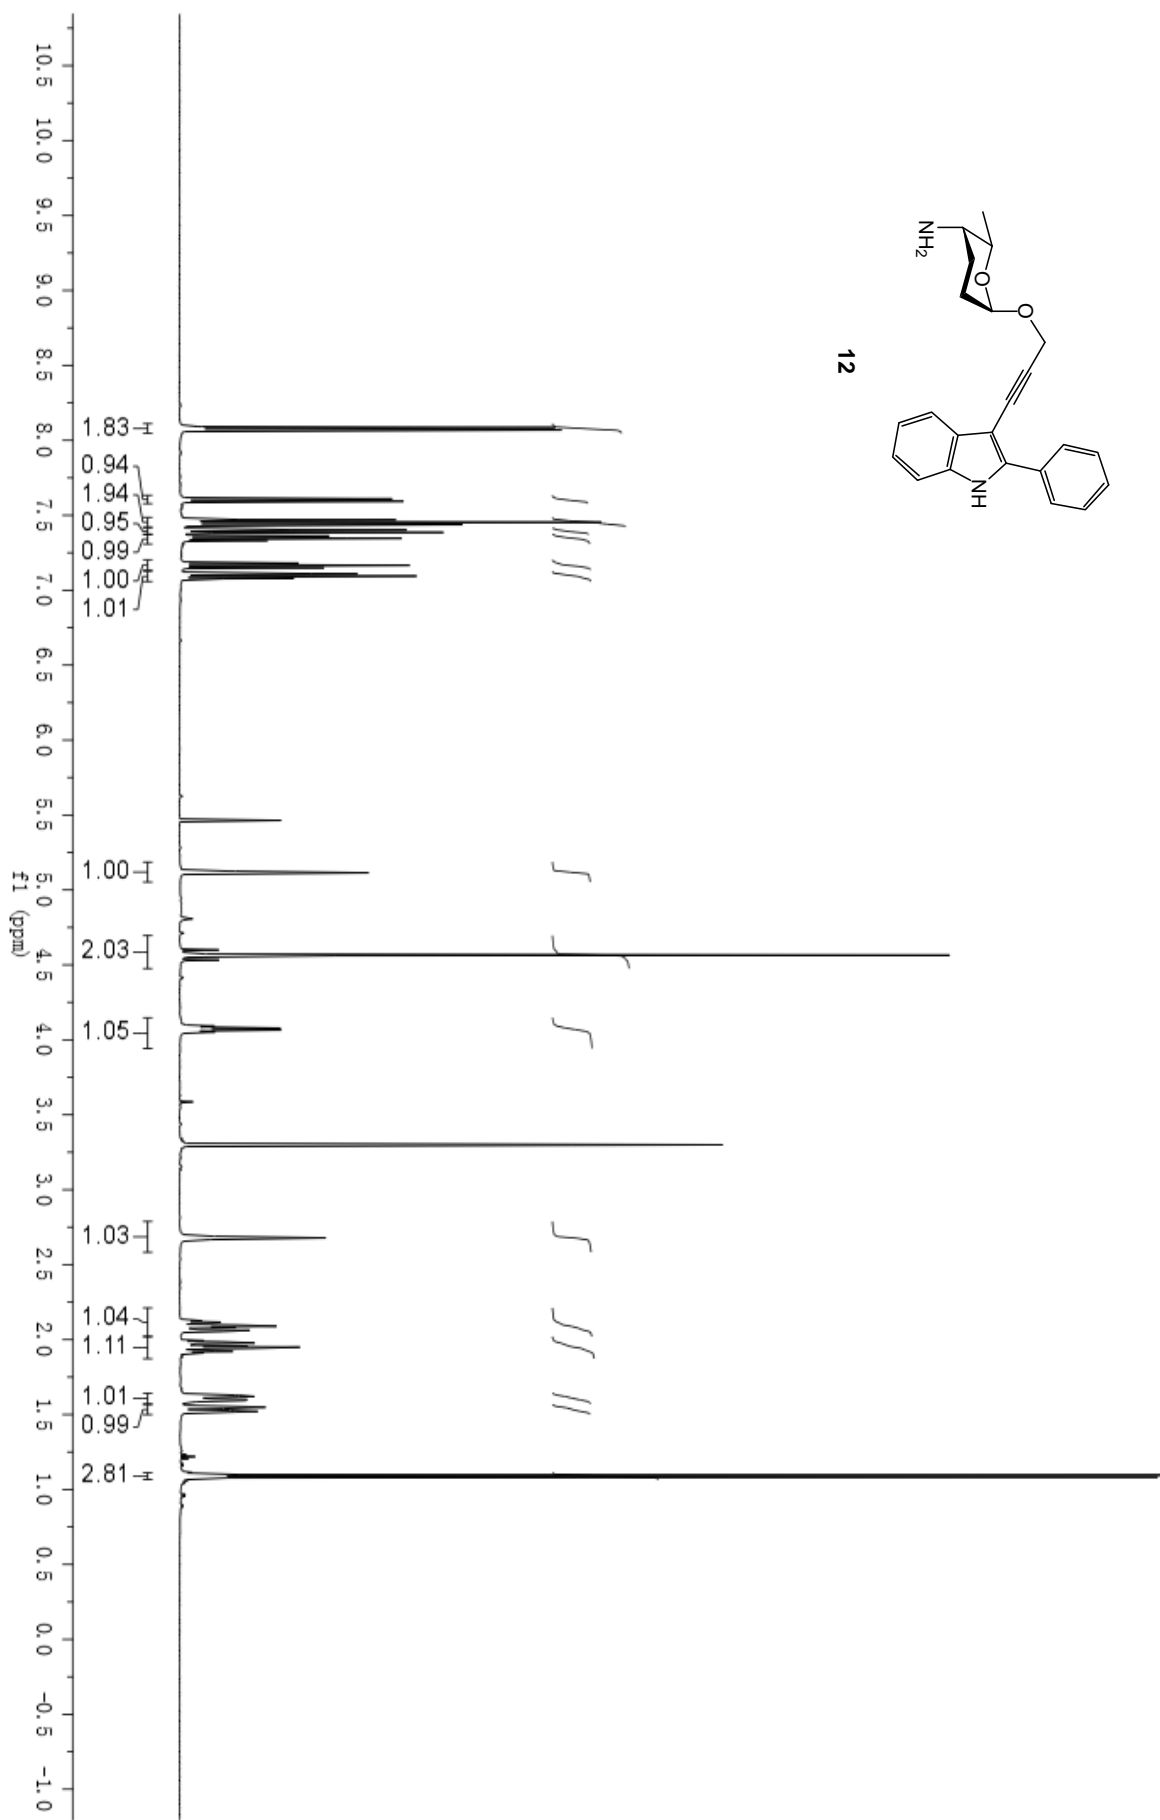

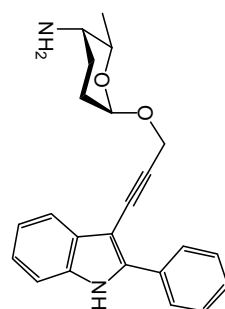

12

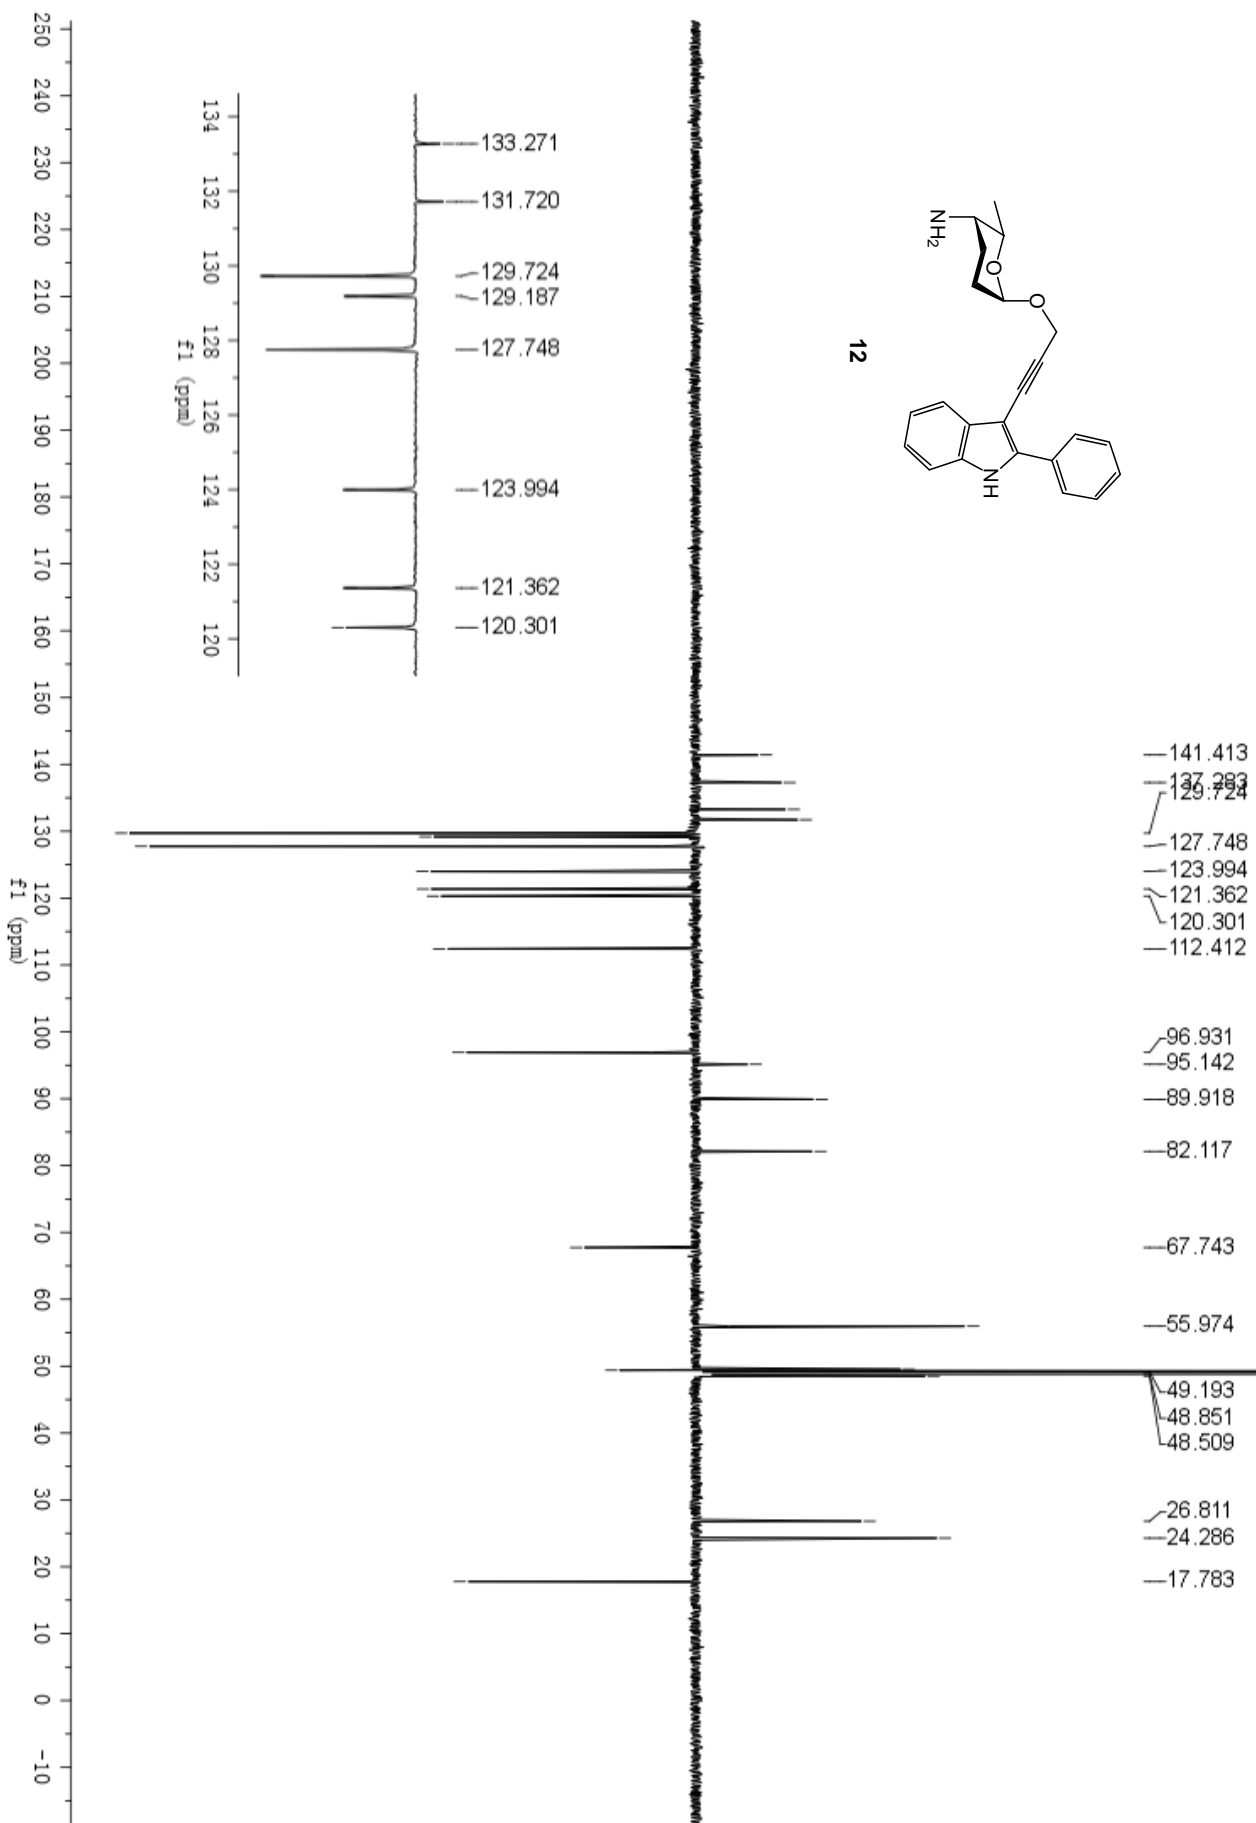

SW-04-127  
600 MHz 1D in CDCl3 (ref. to CDCl3 @ 7.26 ppm), temp 28.0 C -> actual temp = 27.0 C, id600 probe  
date: Mar 27 2007 sweep width: 7201Hz acq.time: 5.0s relax.time: 0.1s # scans: 8 dig.res.: 0.1 Hz/pt hz/mm:30.0  
spectrometer:d601 file:/mnt/d600/home9/tilnmr/nmrdata/wei.shi/Project 1-book 4/100-208/sw-04-127.fid

Pulse Sequence: s2pu1

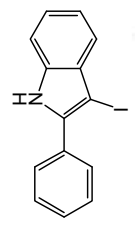

16

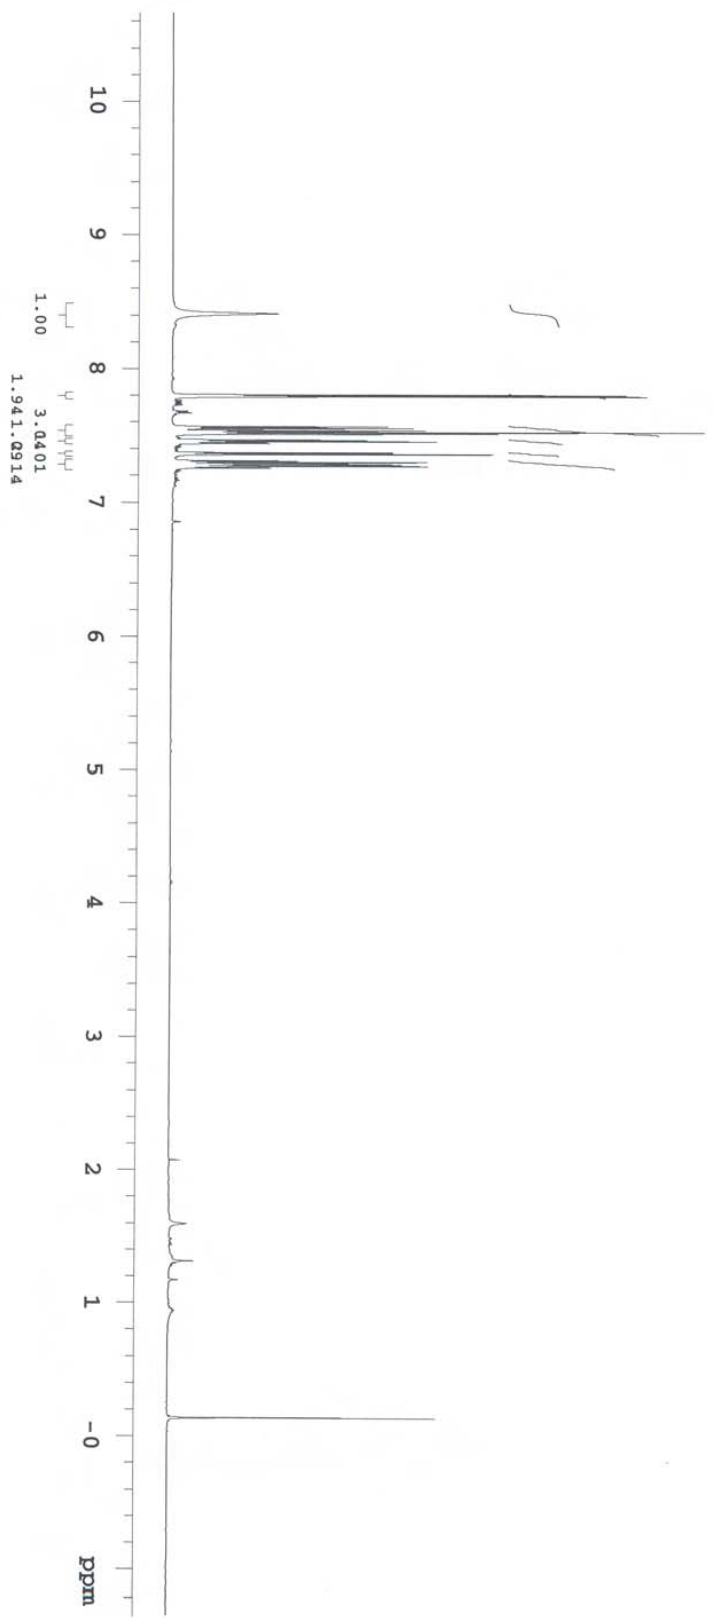

sw-04-127  
125 MHz APPT in CDCl3 (ref. to CDCl3 @ 77.0 ppm), temp 27.2 C -> actual temp = 27.0 C, sw probe  
Date: 04/10/2008 10:45:33 AM, file: /mnt/d600/home9/tilnmr/nmrdata/wel.shi/Project 1-book 4/100-208/sw-04-127-APPT.fid  
Spectrometer: d601  
Pulse Sequence: apt

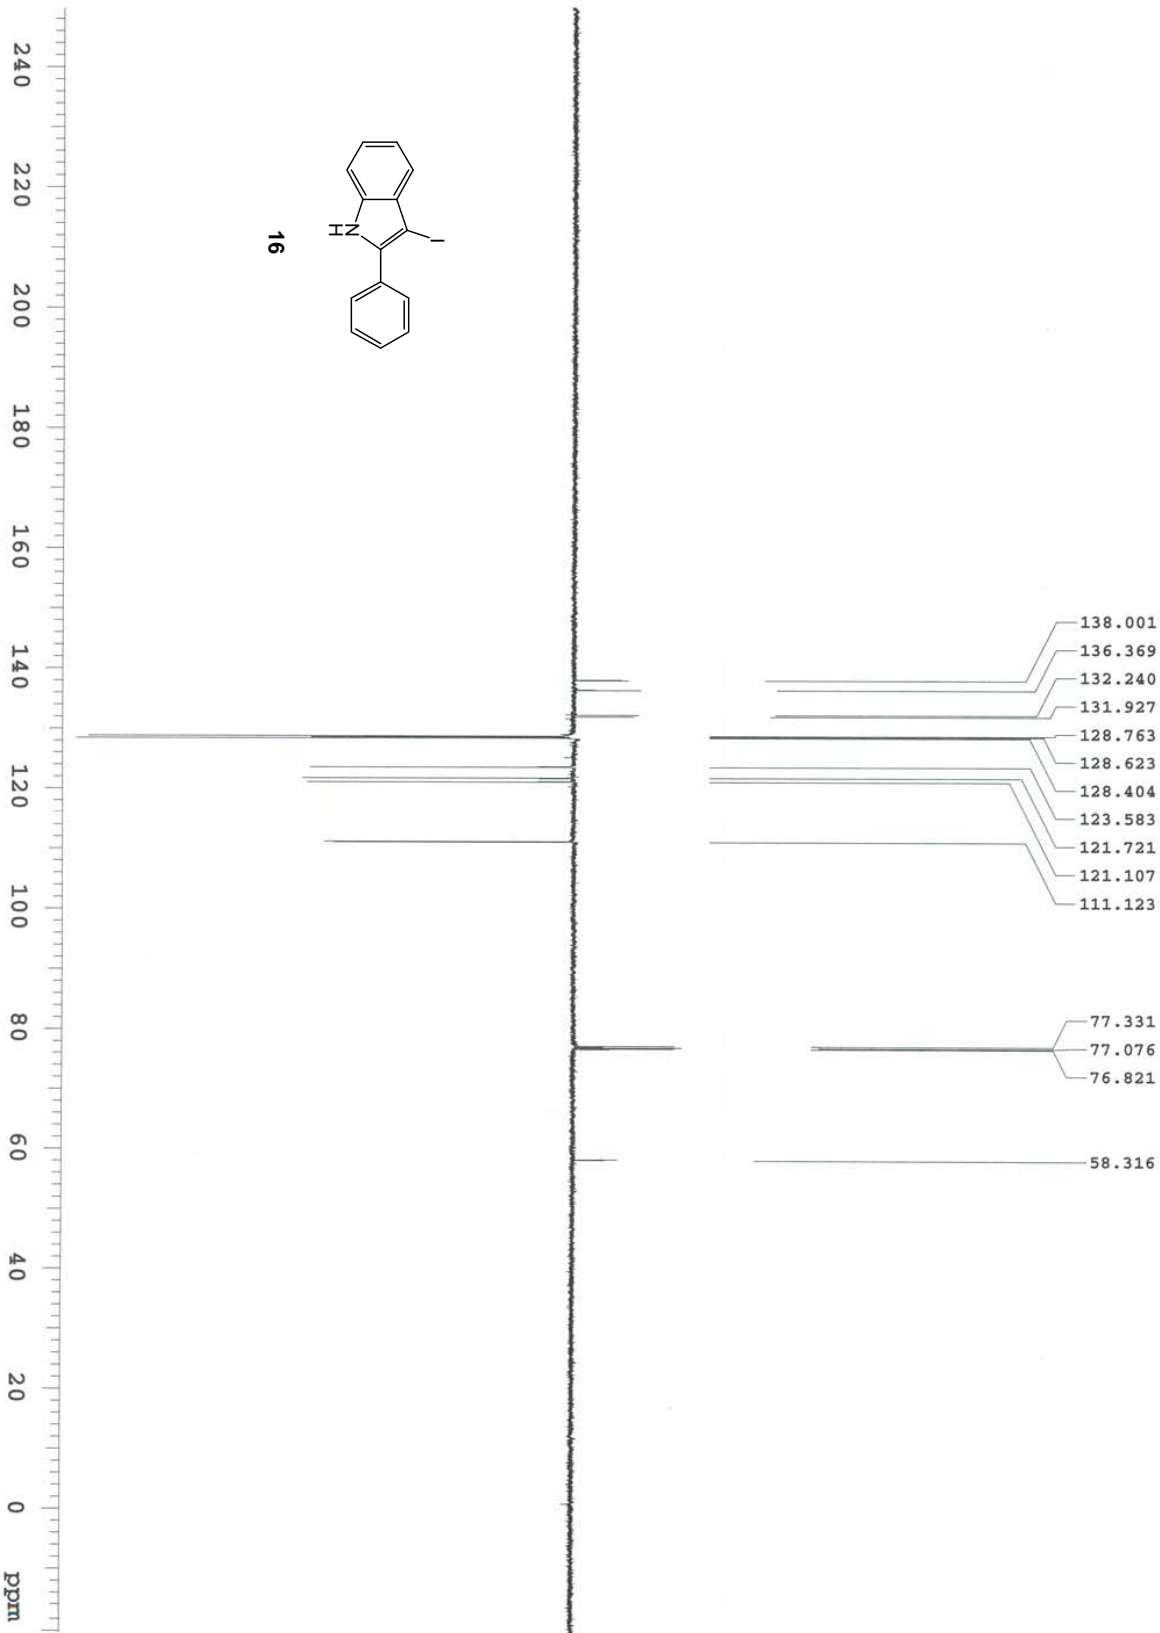

sw-04-131  
500 MHz 1D in CDCl3 (ref. to CDCl3 @ 7.26 ppm), temp 27.2 C -> actual temp = 27.0 C, sw500 probe  
date: Apr 6 2007 sweep width: 6001Hz acq.time: 5.0s relax.time: 0.1s # scans: 16 dig.res: 0.1 Hz/pt hz/mm:25.0  
spectrometer:d601 file:/mnt/d600/home9/llimr/nmrdata/wei.shi/Project 1-book 4/100-208/sw-04-131.fid

Pulse Sequence: s2pul

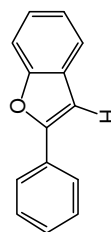

20

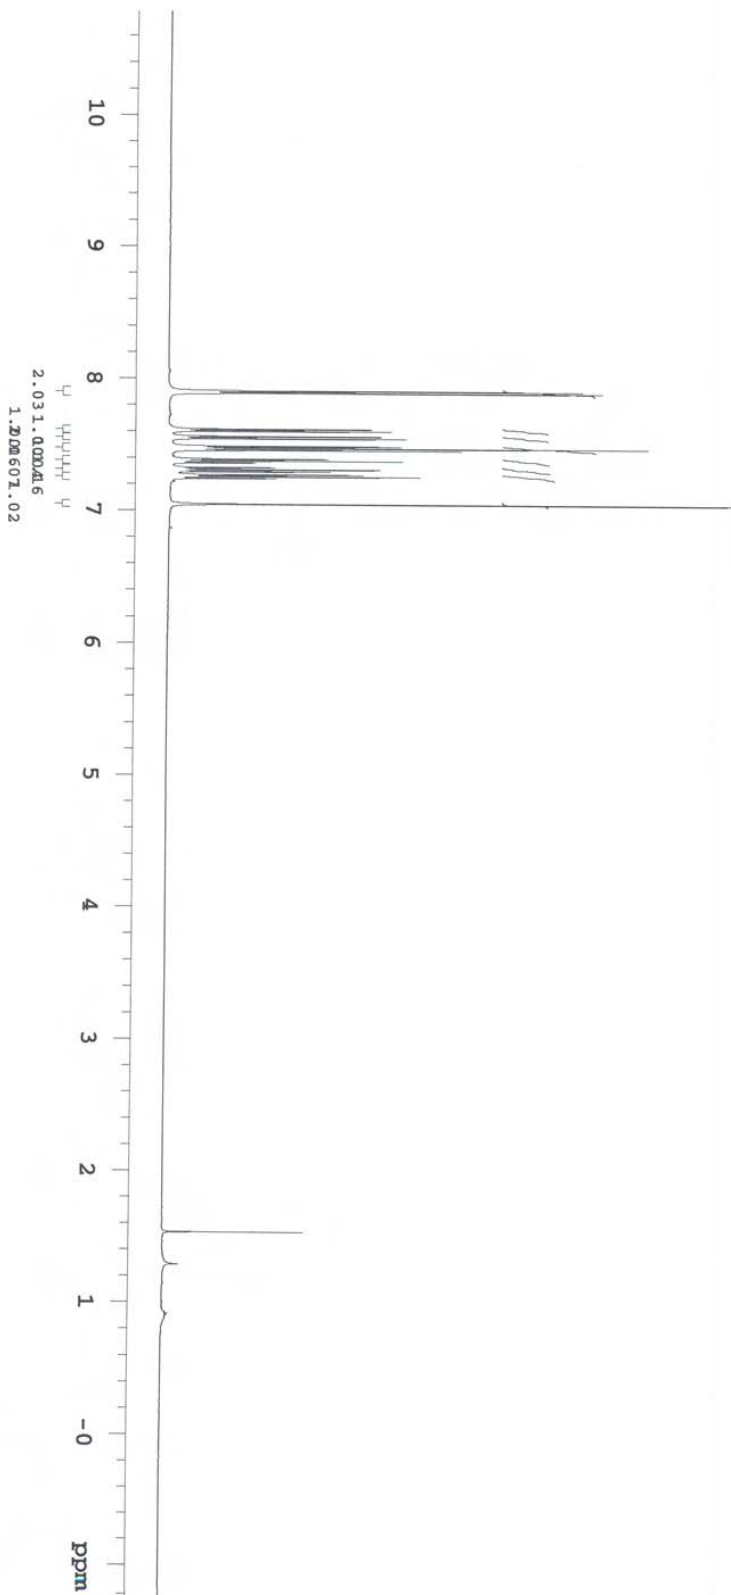

sw-04-131  
125 MHz APPT in CDCl3 (ref. to CDCl3 @ 77.0 ppm), temp 27.2 C -> actual temp = 27.0 C, sw\_probe  
date\_acq: 2007-08-23 09:28:27, file: /mnt/d600/home9/clinmr/nmrdata/wel.sml/Project 1-Book 4/100-208/sw-04-131-APPT.fid  
spectrometer: d601  
File: /mnt/d600/home9/clinmr/nmrdata/wel.sml/Project 1-Book 4/100-208/sw-04-131-APPT.fid

Pulse Sequence: apt

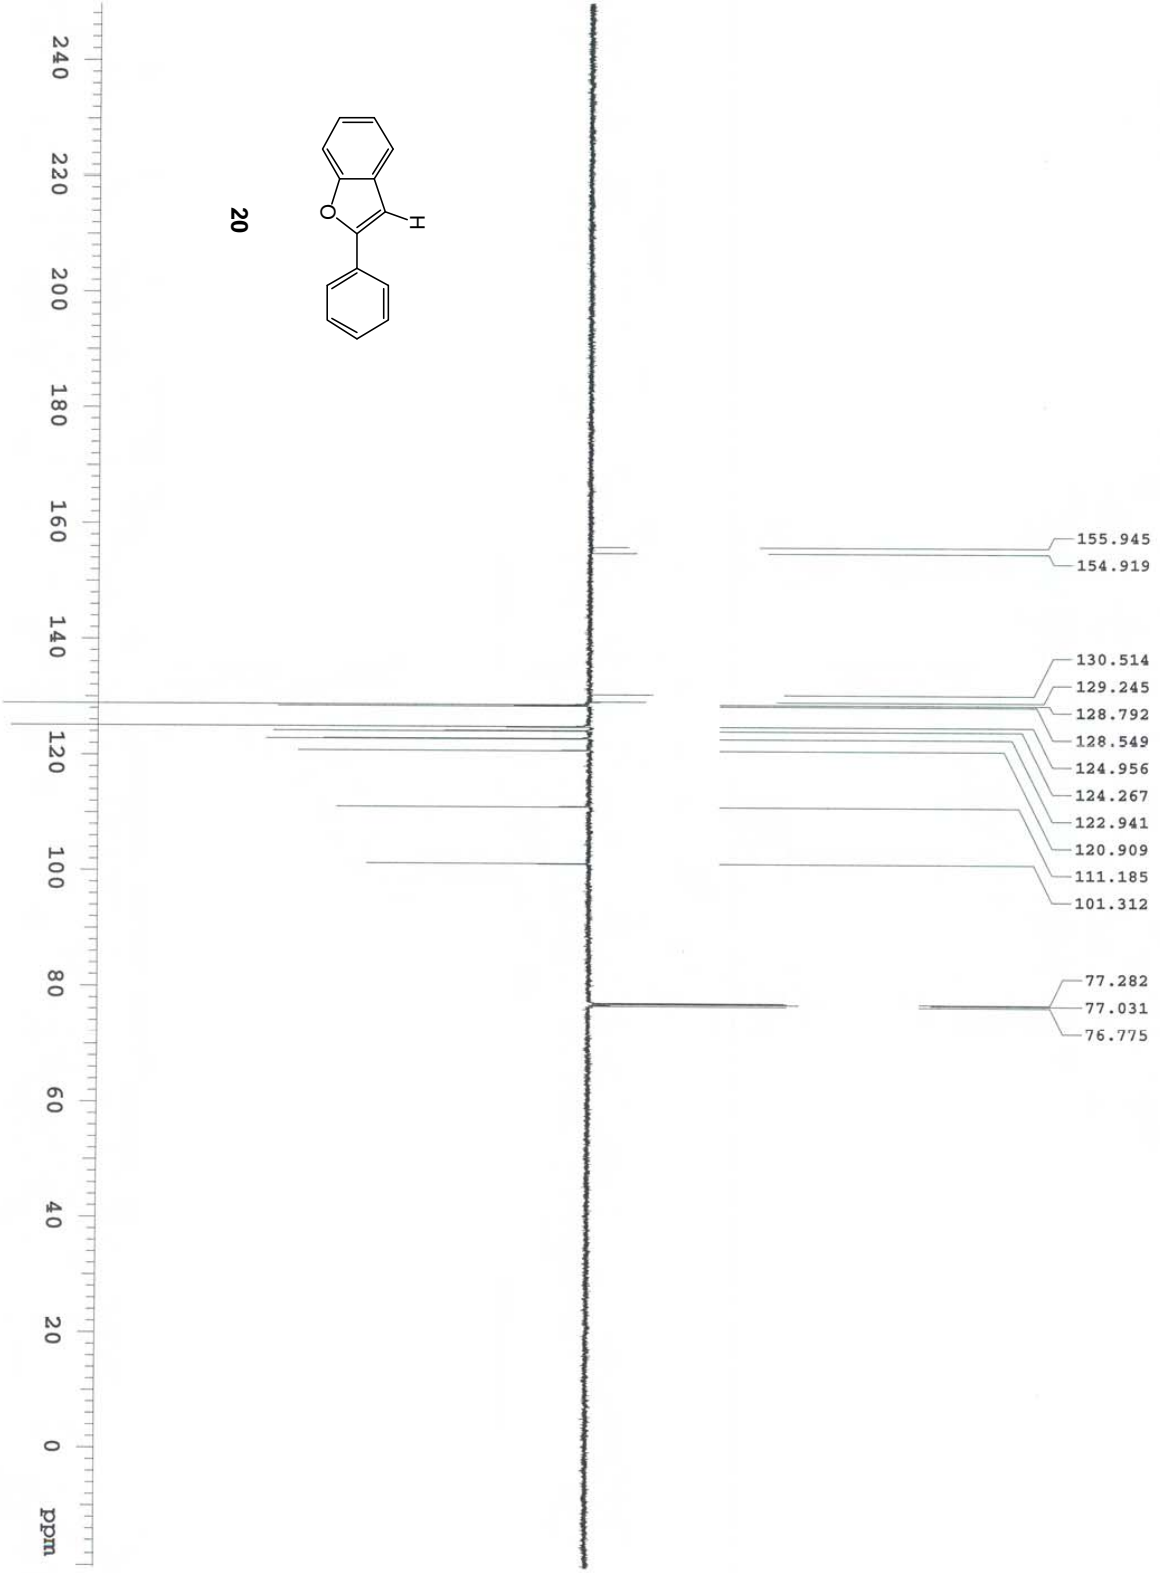

sw-04-133  
500 MHz 1D in CDCl3 (ref. to CDCl3 @ 7.26 ppm), temp 27.2 C -> actual temp = 27.0 C, sw500 probe  
date: Apr 7 2007 sweep width: 6001Hz acq time: 5.0s relax time: 0.1s # scans: 16 dig.res.: 0.1 Hz/pt hz/mm: 25.0  
spectrometer: d601 file: /mnt/d600/homes/clinmt/mrdata/webi.shi/Project 1-book 4/100-208/sw-04-133.fid

Pulse Sequence: s2pul

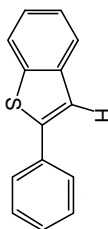

21

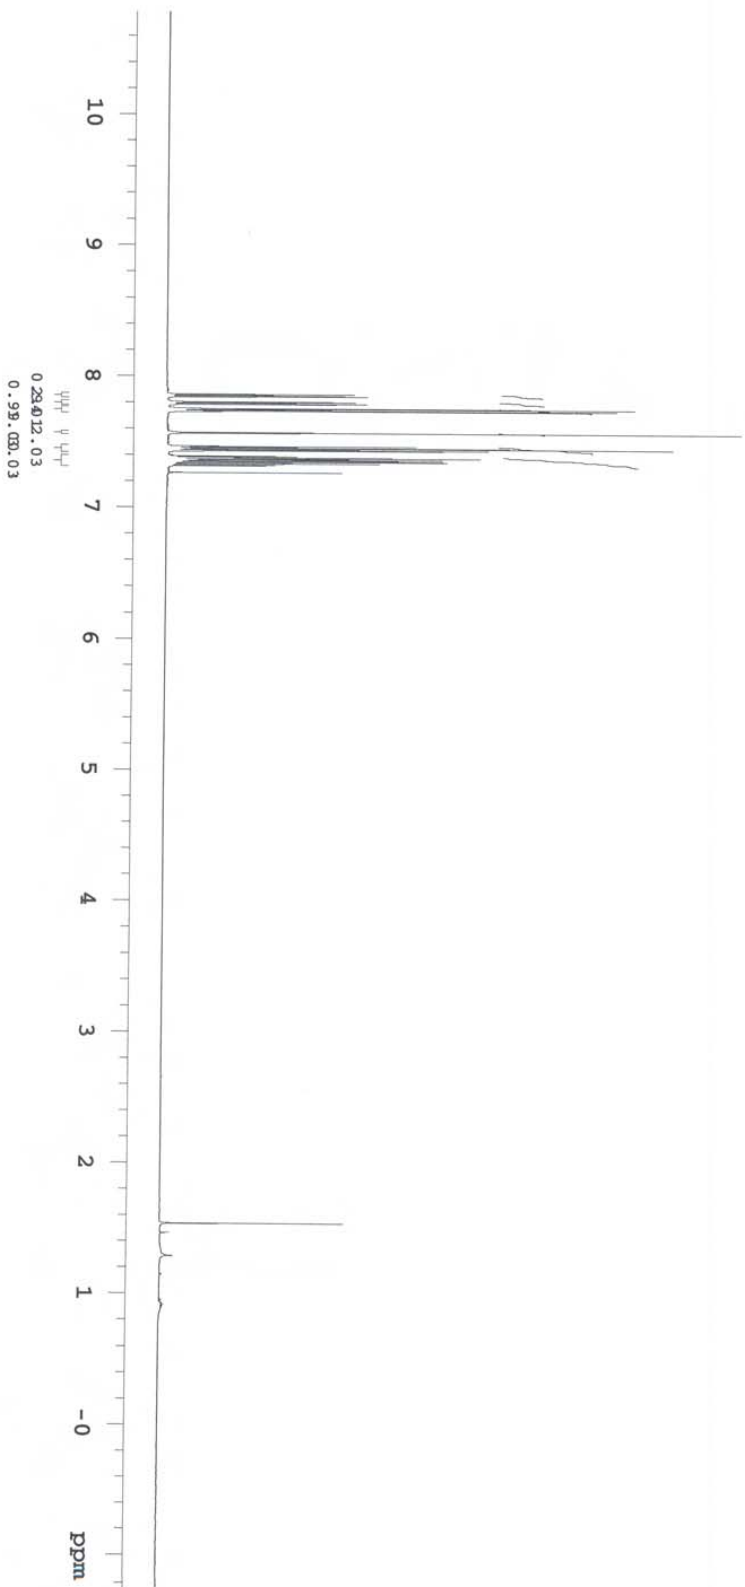



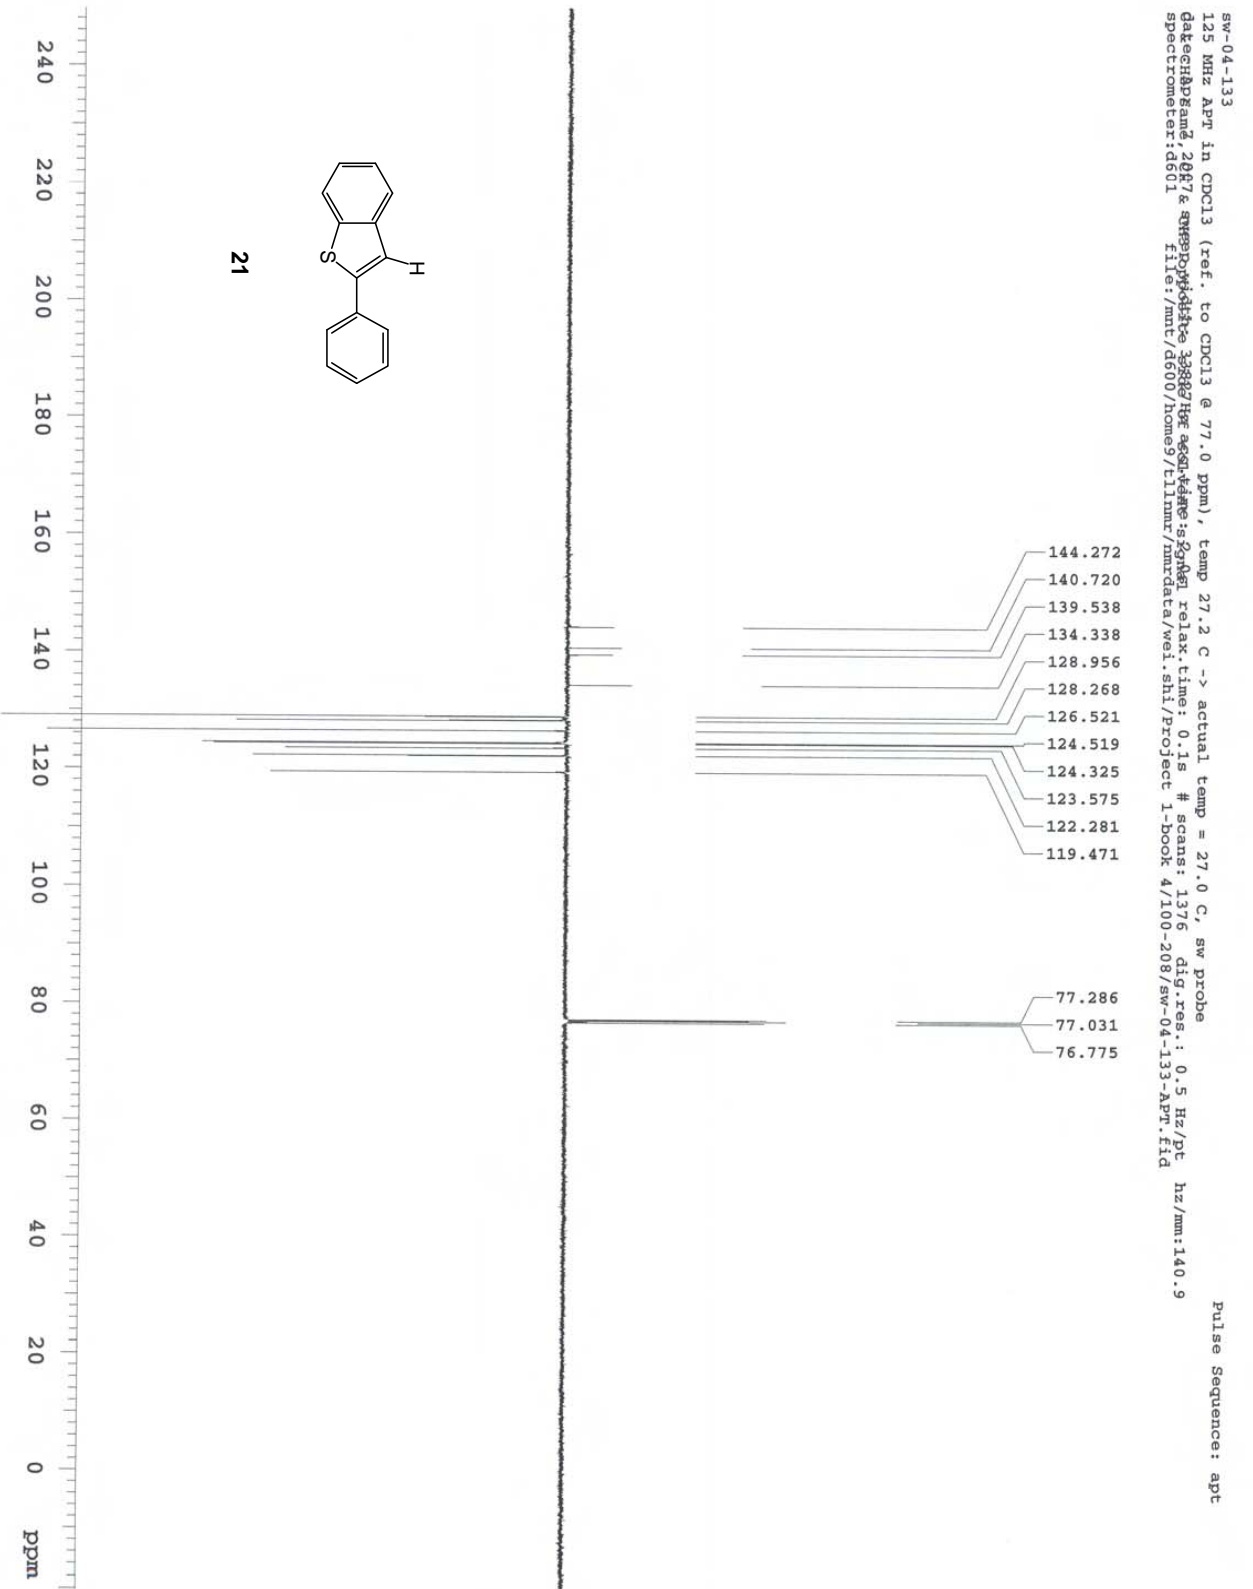

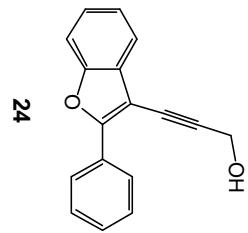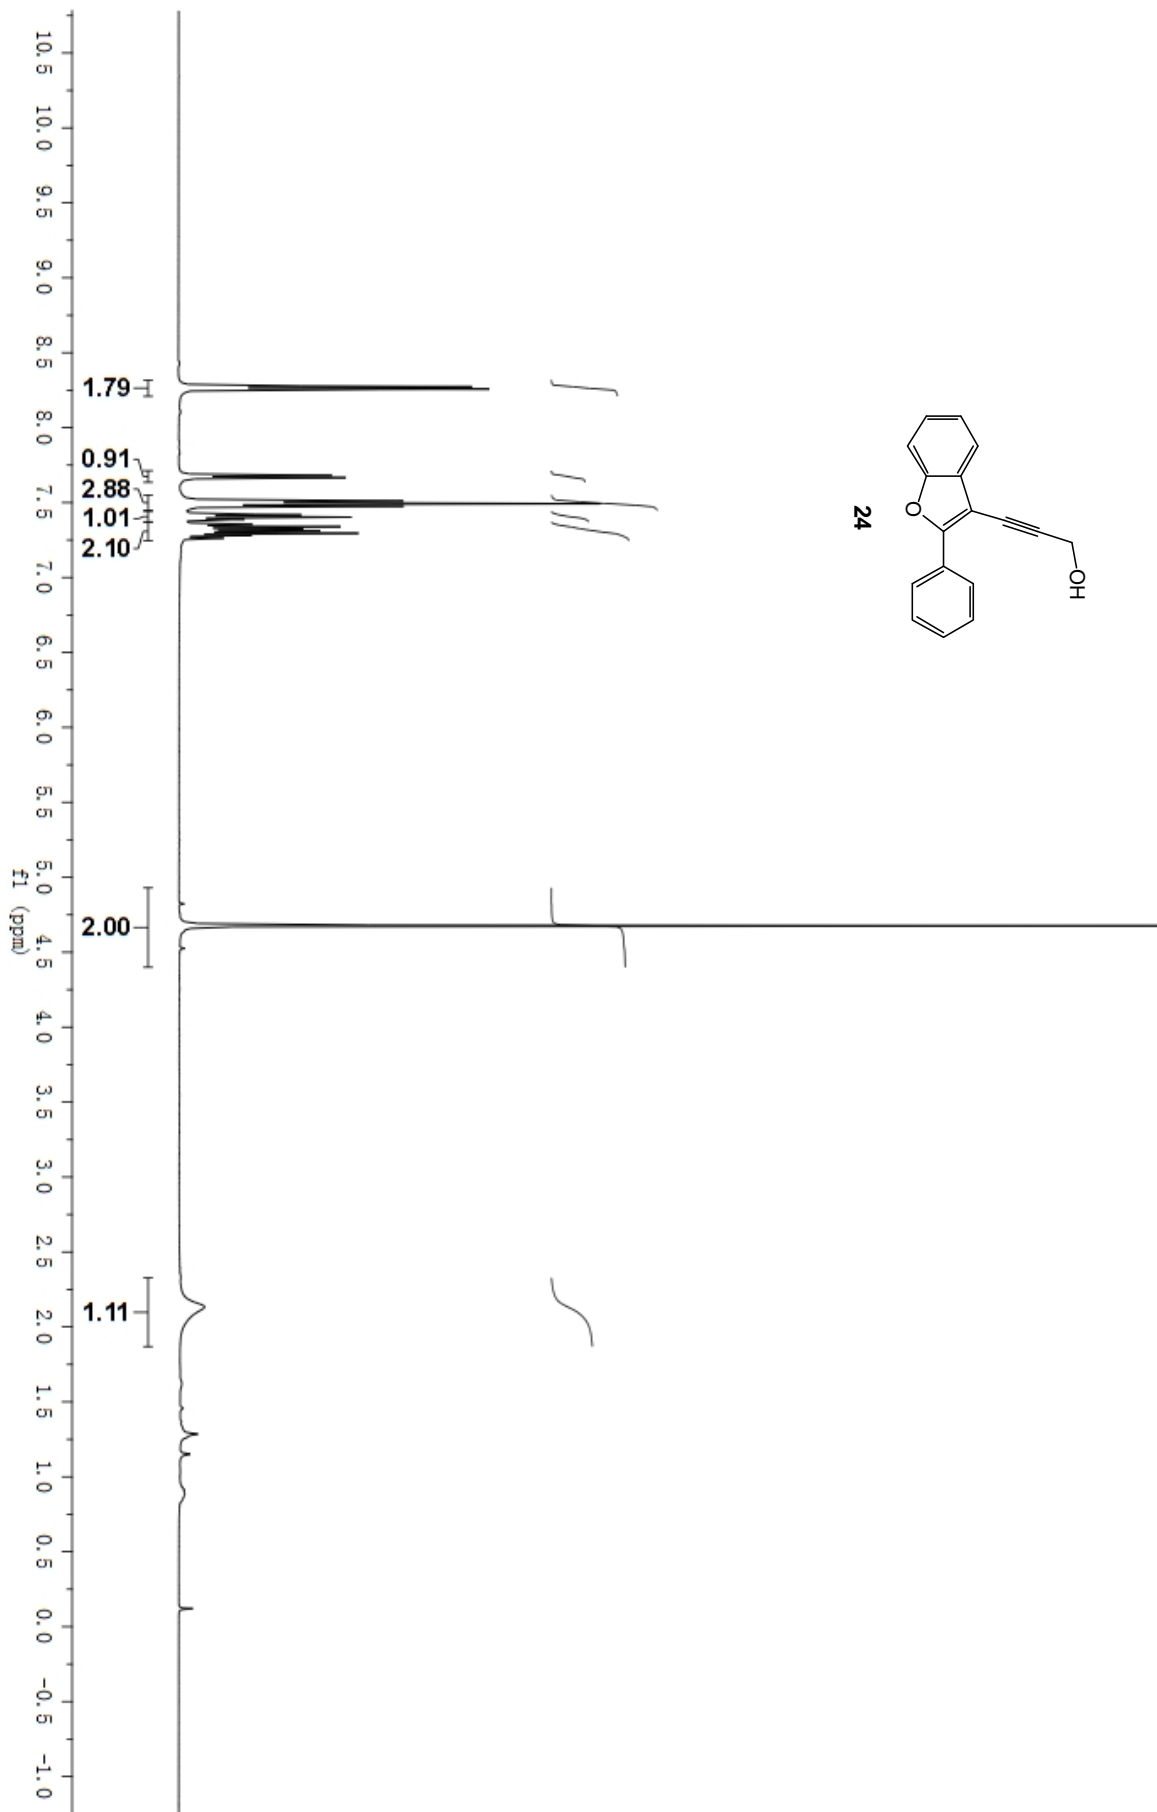

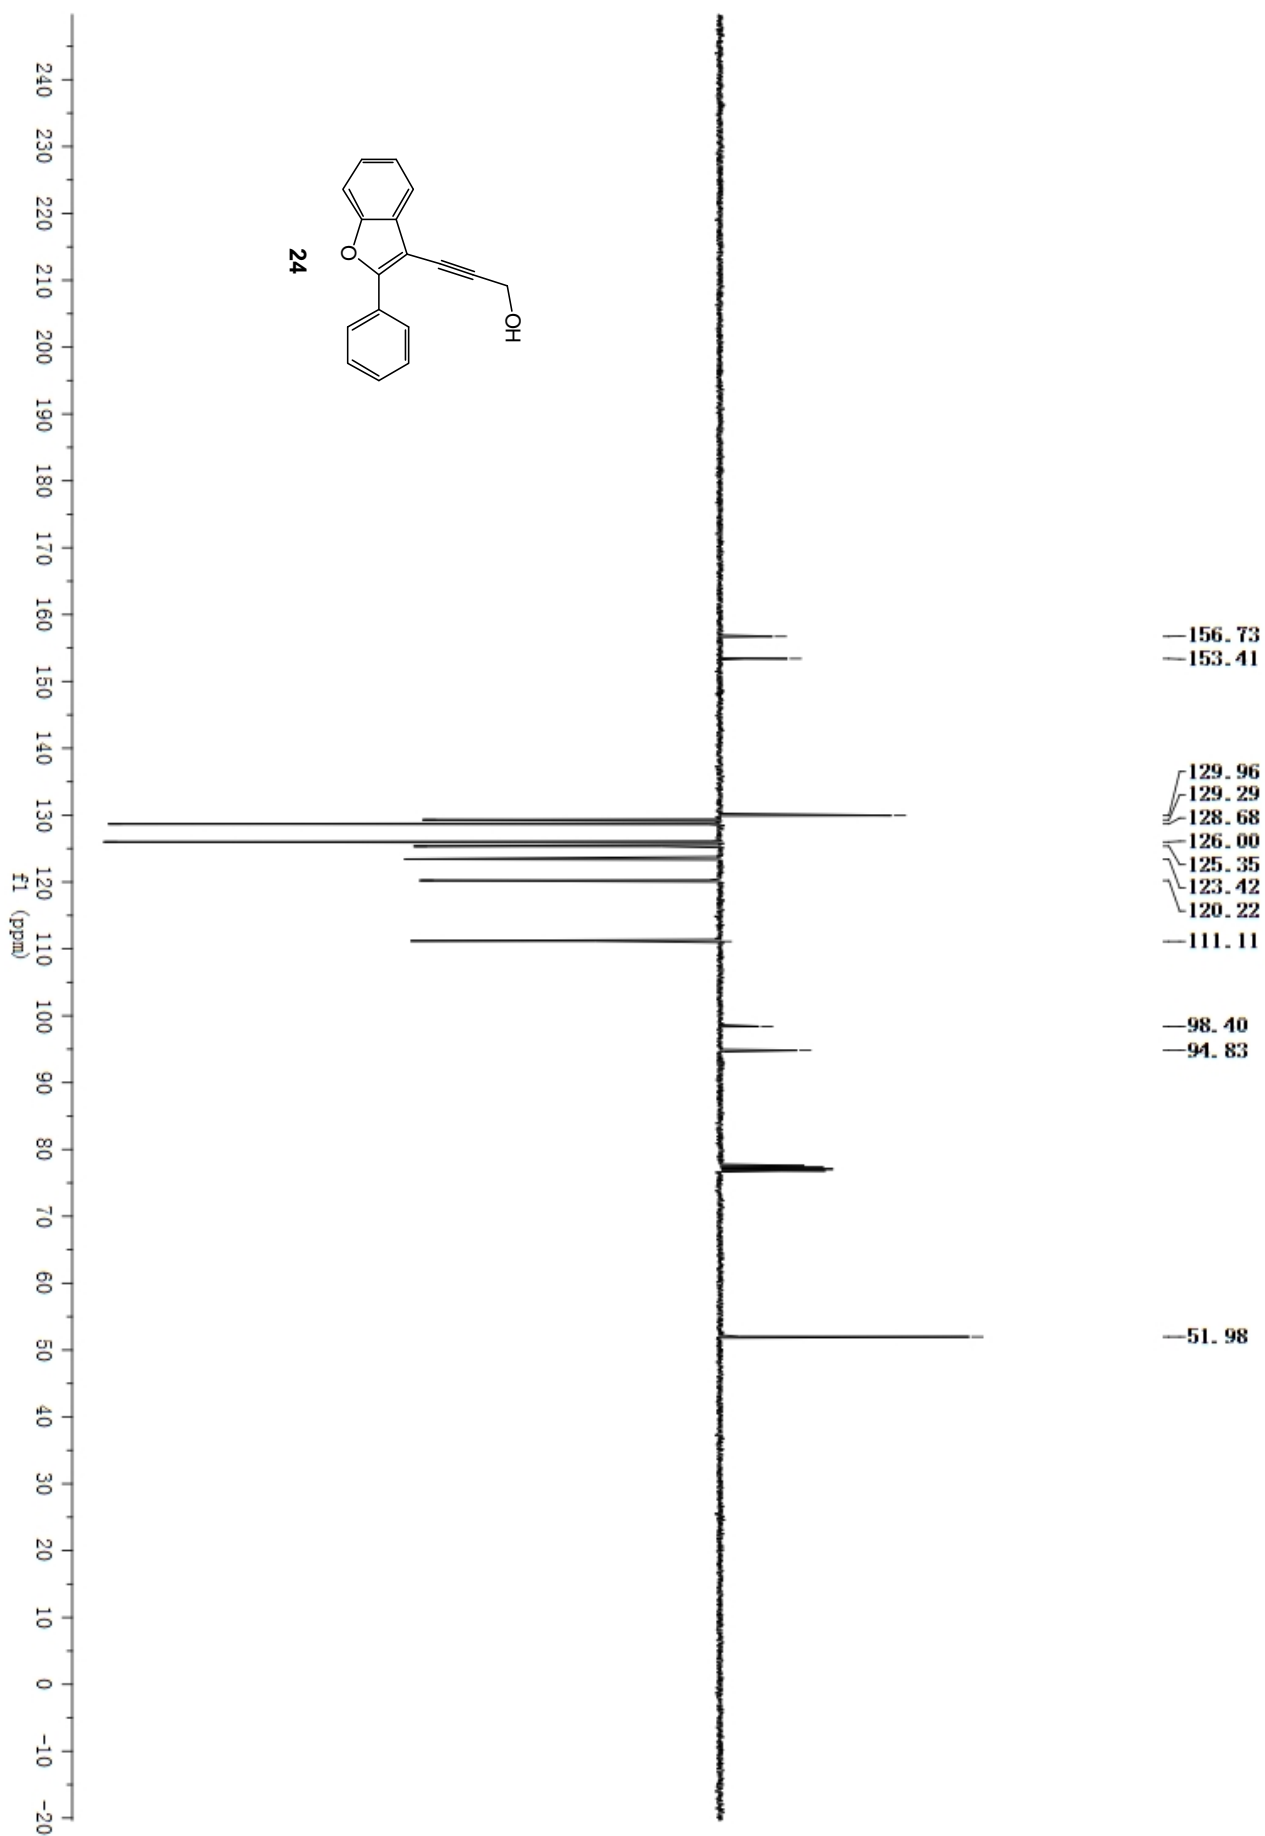

SW-01-093  
500 MHz 1D in CDCl3 (ref. to CDCl3 @ 7.24 ppm), temp 29.4 C -> actual temp = 27.0 C, sw500u probe  
date: Apr 10 2004 sweep wdth: 5001Hz acq.time: 2.0s relax.time: 3.0s # scans: 16 dig.res.: 0.1 Hz/pt hz/mm:20.8  
spectrometer:d601 file:/cdrom/cdrom#4/051-100/sw-01-093.fid

Pulse Sequence: s2gpi1

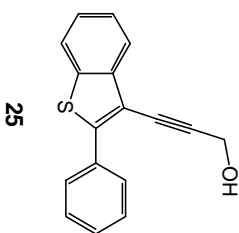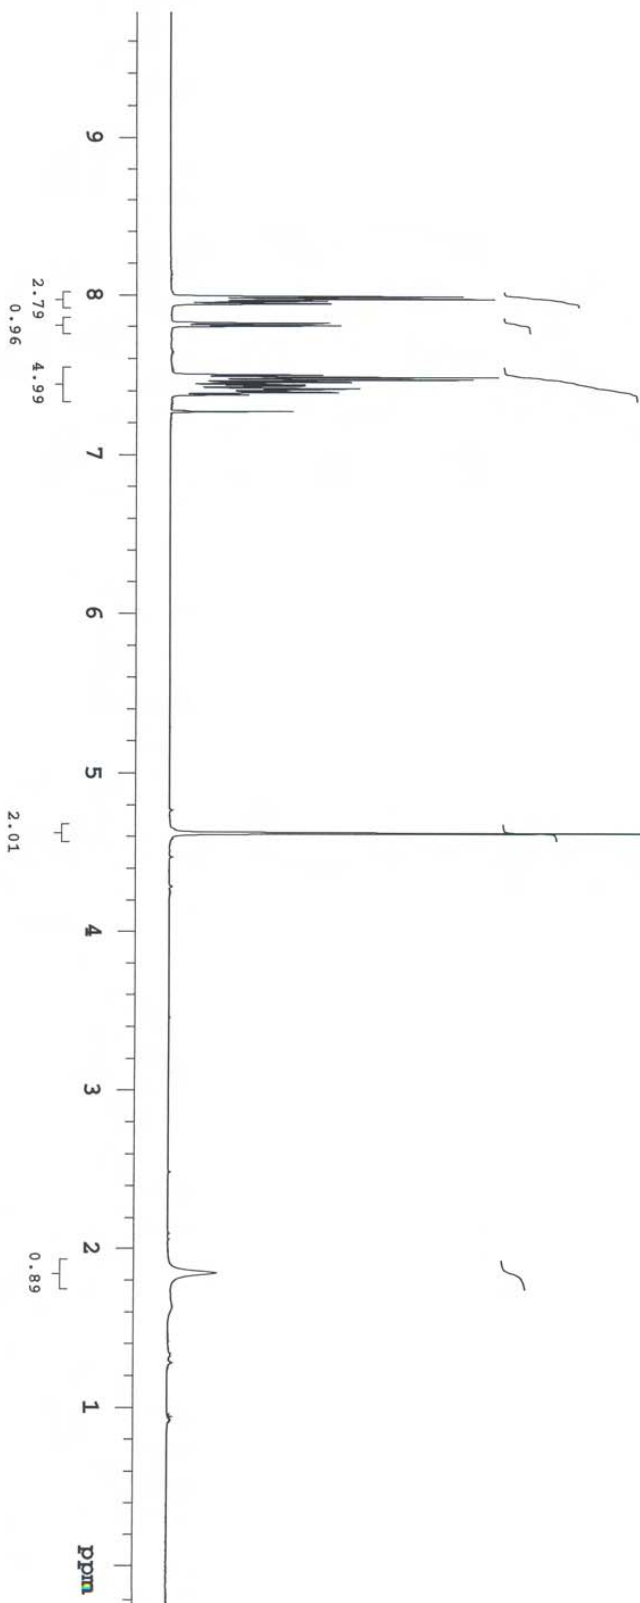

sw-01-093  
 125 MHz APF in CDCl3 (ref. to CDCl3 @ 77.0 ppm), temp 29.4 C -> actual temp = 27.0 C, sw500u probe  
 date: 2004-04-23 11:51:10  
 file: /cdrom/cdrom#1/051-100/sw-01-093-APF.fid  
 Spectrometer: d601  
 Pulse Sequence: apt

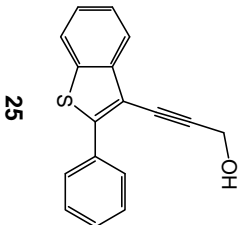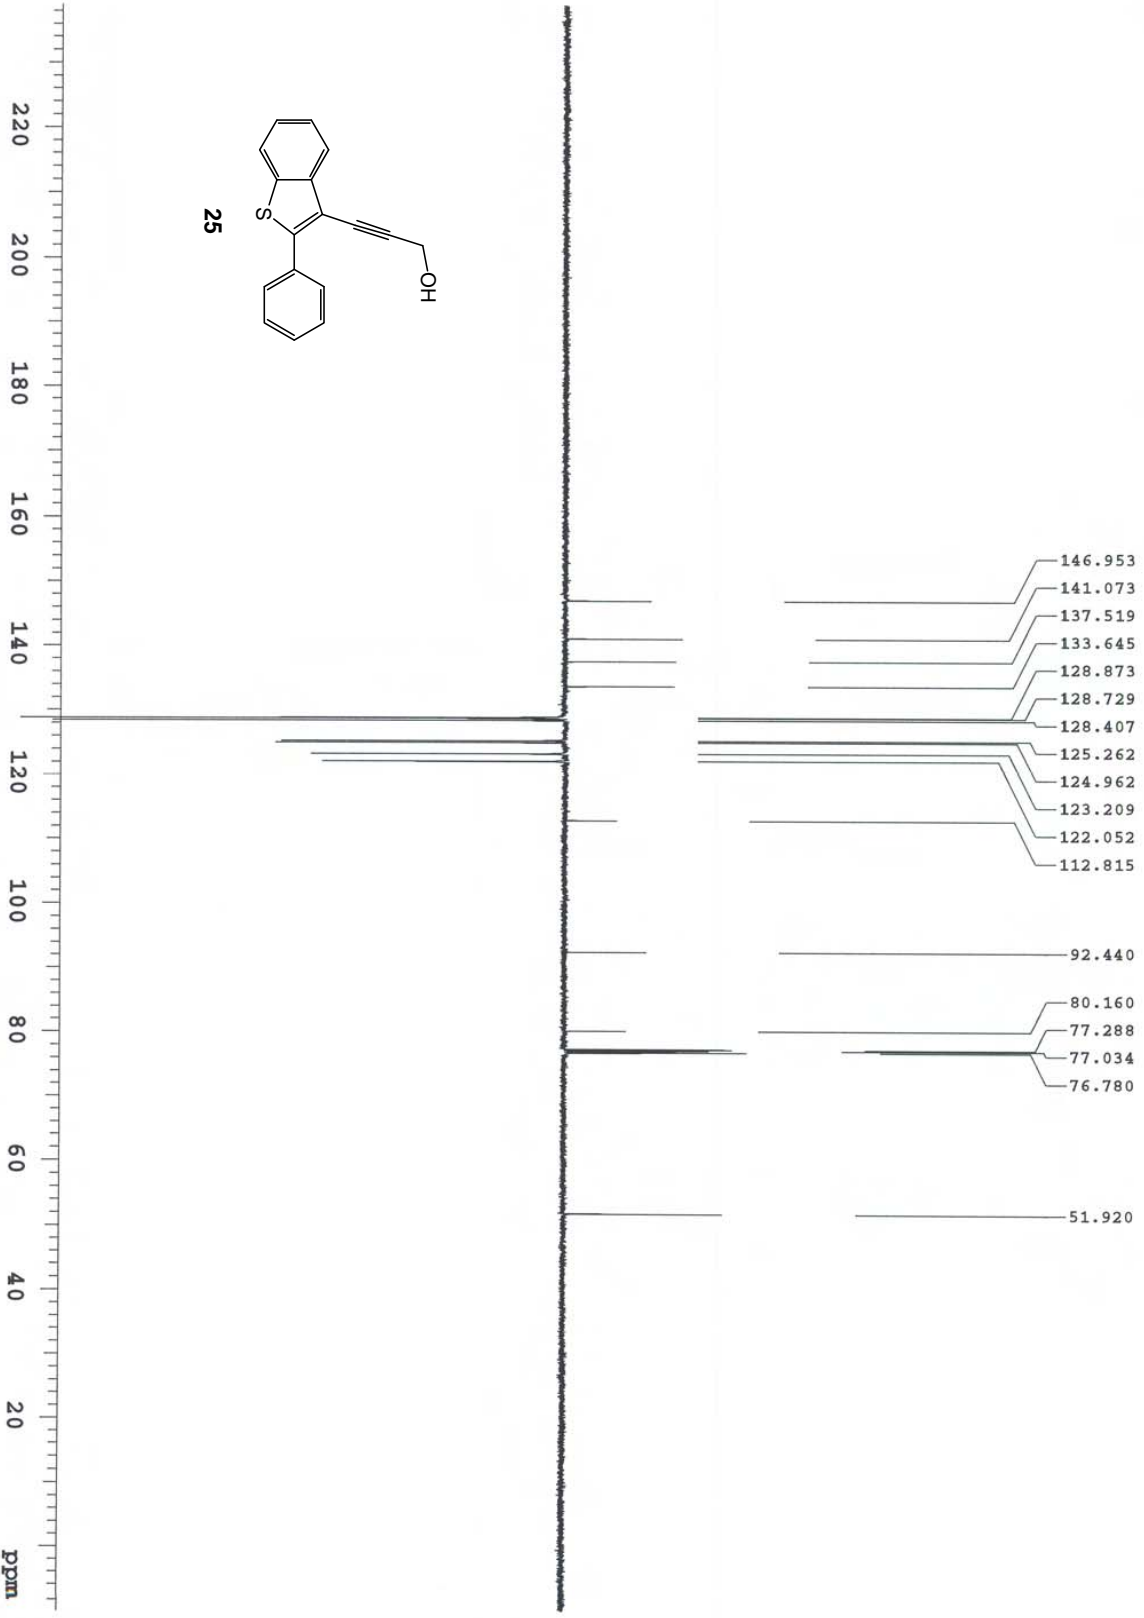

sw-04-155  
500 MHz 1D in CDCl3 (ref. to CDCl3 @ 7.26 ppm), temp 27.2 C -> actual temp = 27.0 C, sw500 probe  
date: Apr 30 2007 sweep width: 6001Hz acq.time: 5.0s relax.time: 0.1s # scans: 16 dig.res.: 0.1 Hz/pt hz/mm: 25.0  
spectrometer: d601 file: /mnt/d600/home9/ellimuz/nmdata/wel.sh1/Project 1-Book 4/100-208/sw-04-155.fid

Pulse Sequence: s2pul

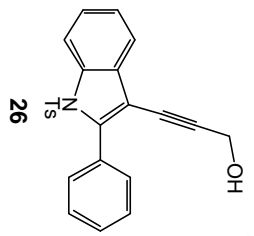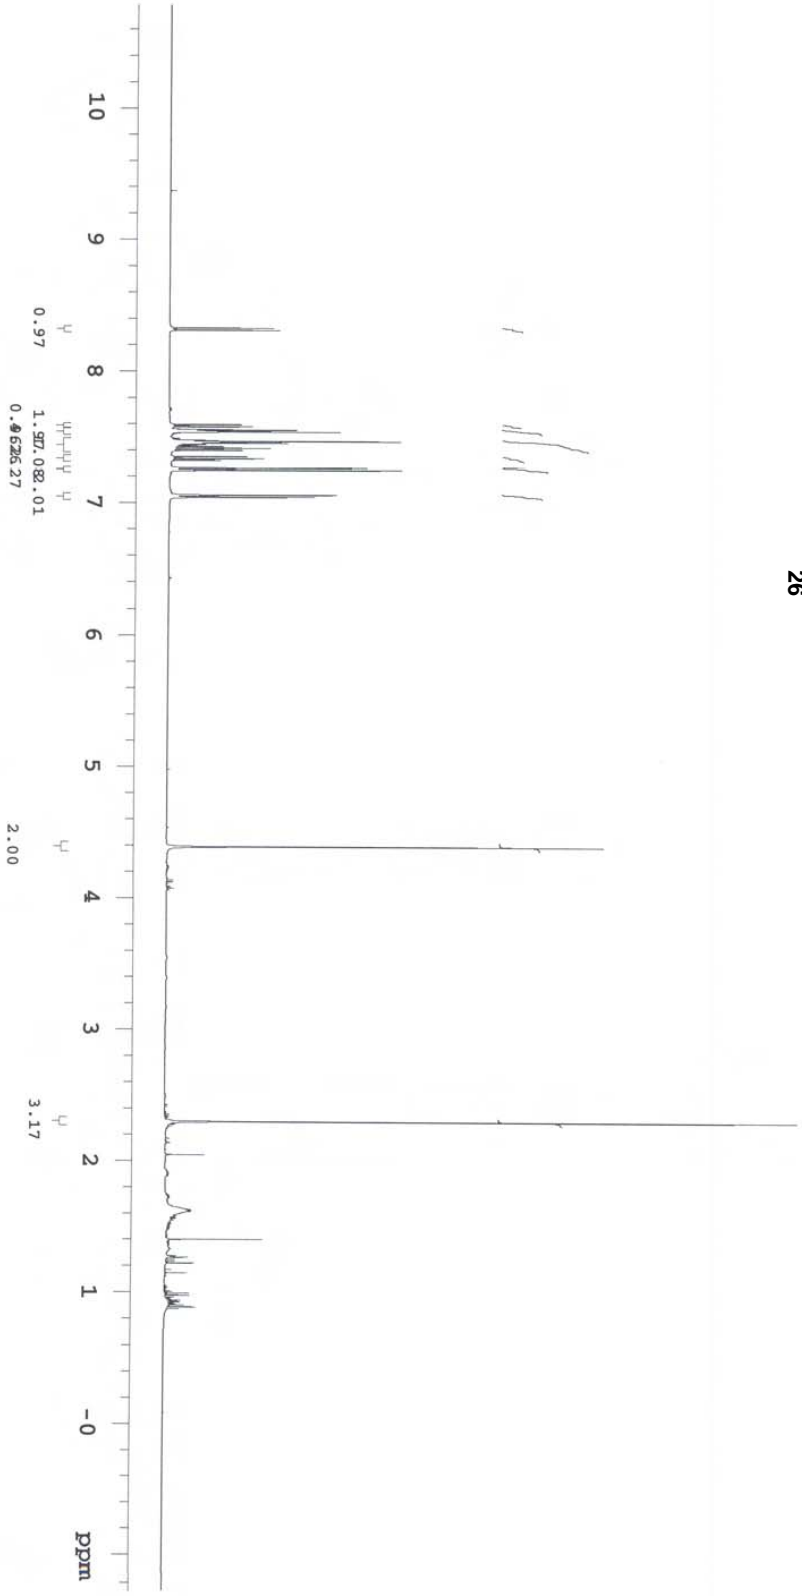

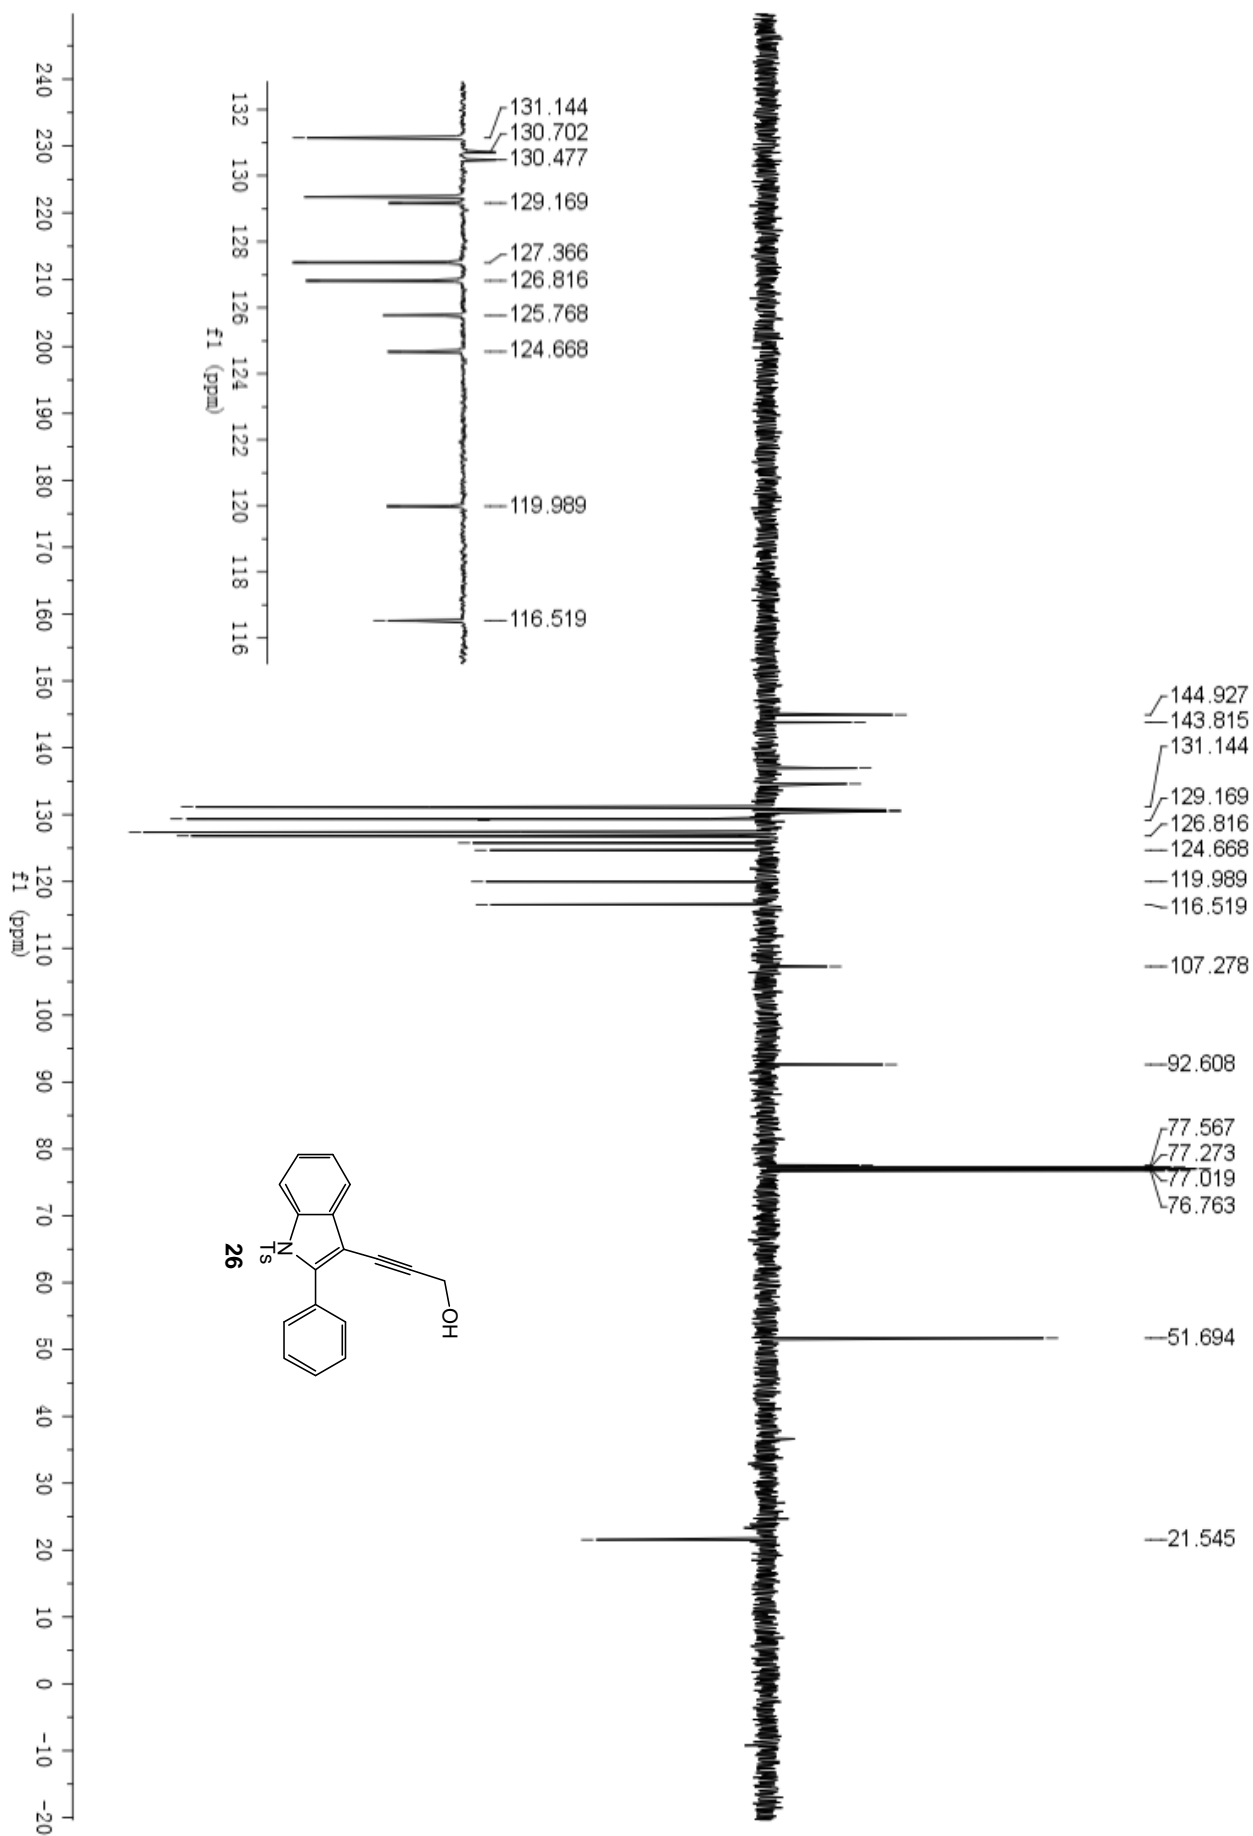

SW-04-161  
 600 MHz 1D in CDCl3 (ref. to CDCl3 @ 7.26 ppm), temp 28.0 C -> actual temp = 27.0 C, id600 probe  
 date: May 14 2007 sweep width: 7201Hz acq.time: 5.08 relax.time: 0.1s # scans: 16 dig.res.: 0.1 Hz/pt hz/mm:30.0  
 spectrometer: d601 File: /mnt/d600/home9/clinmr/nmrdata/wel.shi/Project 1-Book 4/100-208/sw-04-161.fid

Pulse Sequence: s2pnl1

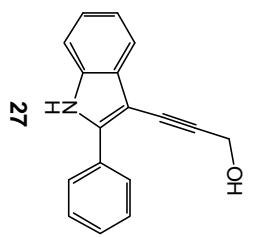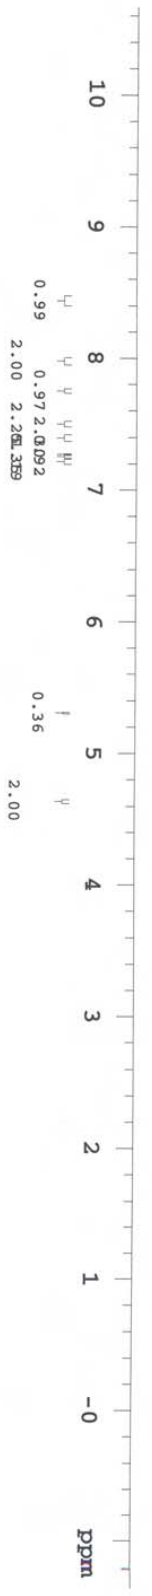



sw-04-171  
125 MHz APF in CD2Cl2 (ref. to CD2Cl2 @ 53.8 ppm), temp 27.2 C -> actual temp = 27.0 C, sw probe  
GateHadamard, 2017 & 2018 3992 Hz acq. rate: 8.948 relax. time: 0.1s # scans: 3992 dig. res.: 0.5 Hz/pt  
Spectrometer: d601 File: /mnt/d600/home9/clinmr/nmrdata/wel.shi/Project 1-book 4/100-208/sw-04-171-APF.fid

Pulse Sequence: apt

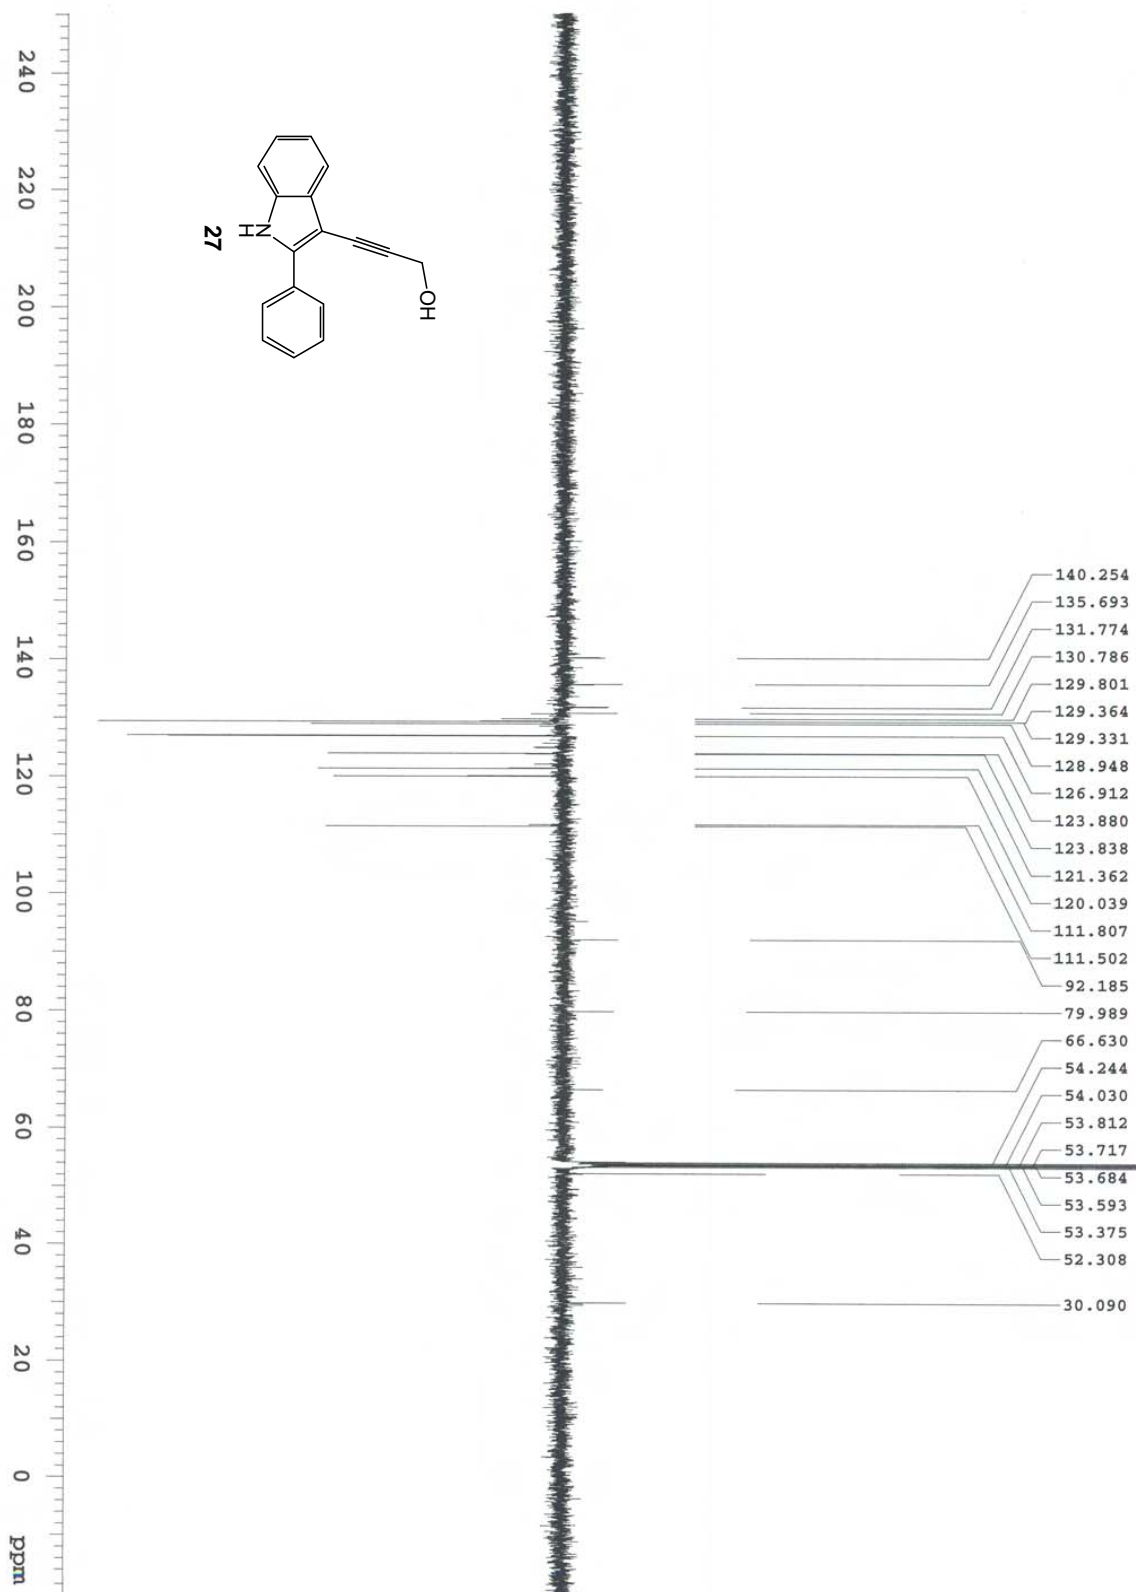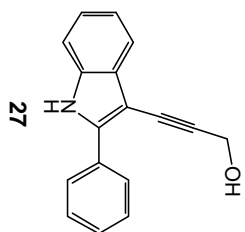

date: Aug 11 2004 sweep width: 5006Hz acq-time:  
spectrometer: d601 file: /cdrom/cdrom#6/1-50/sw

Temp 27.2 C -> actual temp = 27.0 C, sw500 Probe  
2.0s relax-time: 3.0s # scans: 16 dig-res.: 0.1 Hz/pt hz/mm: 20.9  
1-02-015-A.fid

Pulse Sequence: szpu1

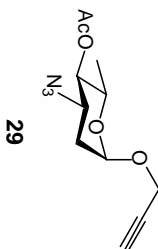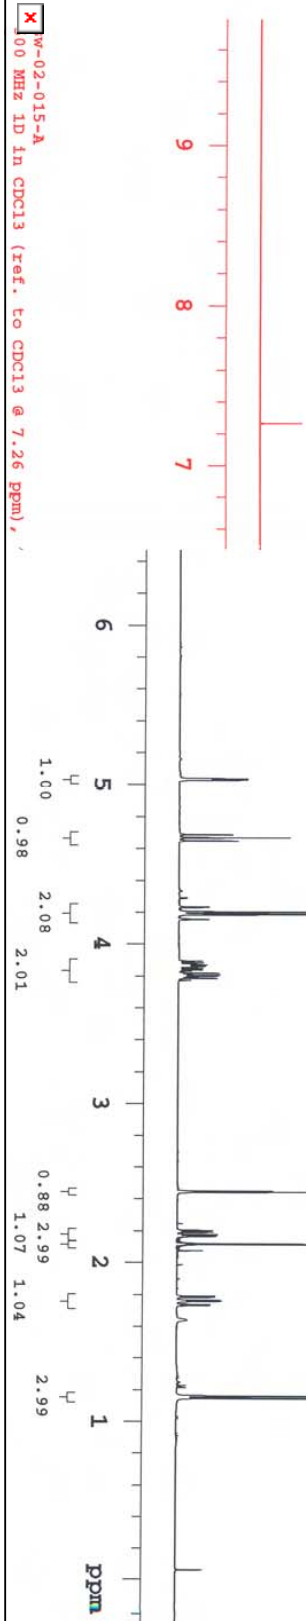

SW-02-015-A  
125 MHz APF in CDCl3 (ref. to CDCl3 @ 77.0 ppm), temp 27.2 C -> actual temp = 27.0 C, sw probe  
Gate: 8.000, 20.000, 30.000, 40.000, 50.000, 60.000, 70.000, 80.000, 90.000, 100.000, 110.000, 120.000, 130.000  
File: /cdrom/cdrom#6/1-50/sw-02-015-A-APF.fid  
Spectrometer: d601  
Pulse Sequence: apt

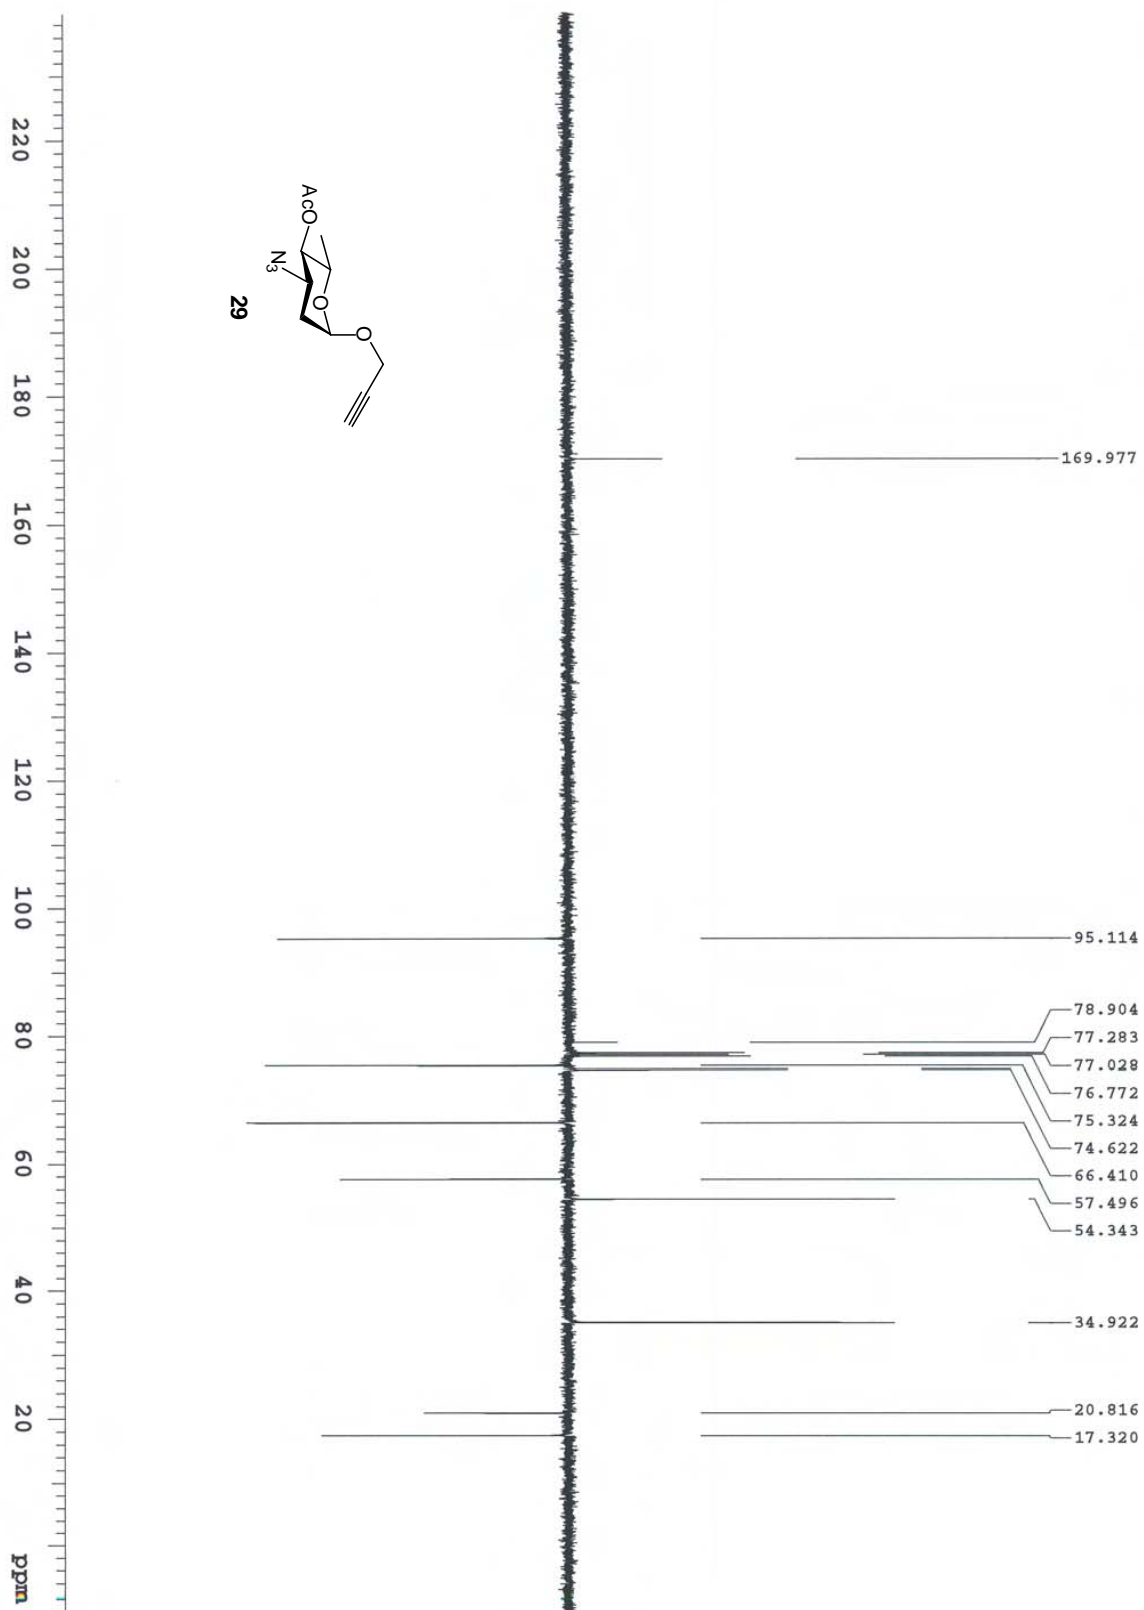

sw-02-015-C  
500 MHz 1D in CDCl3 (ref. to CDCl3 @ 7.26 ppm), temp 27.2 C -> actual temp = 27.0 C, sw500 probe  
date: Aug 11 2004 sweep width: 5006Hz acq.time: 2.05 relax.time: 3.0s # scans: 16 dig.res.: 0.1 Hz/pt hz/mm: 20.9  
Spectrometer: d601 File: /cdrom/cdrom#6/1-30/sw-02-015-C.FID

Pulse Sequence: s2pul

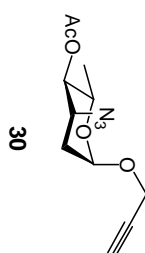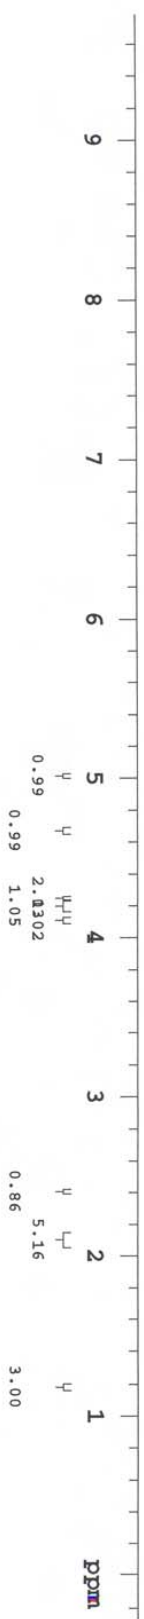

sw-02-015-C  
125 MHz APF in CDCl3 (ref. to CDCl3 @ 77.0 ppm), temp 27.2 C -> actual temp = 27.0 C, sw probe  
data: 2004 08 24 14:34:34 file: /cdrom/cdrom#6/1-50/sw-02-015-C-APF.fid  
spectrometer: d601  
Pulse Sequence: apt

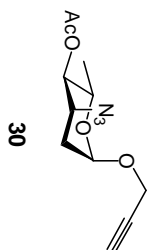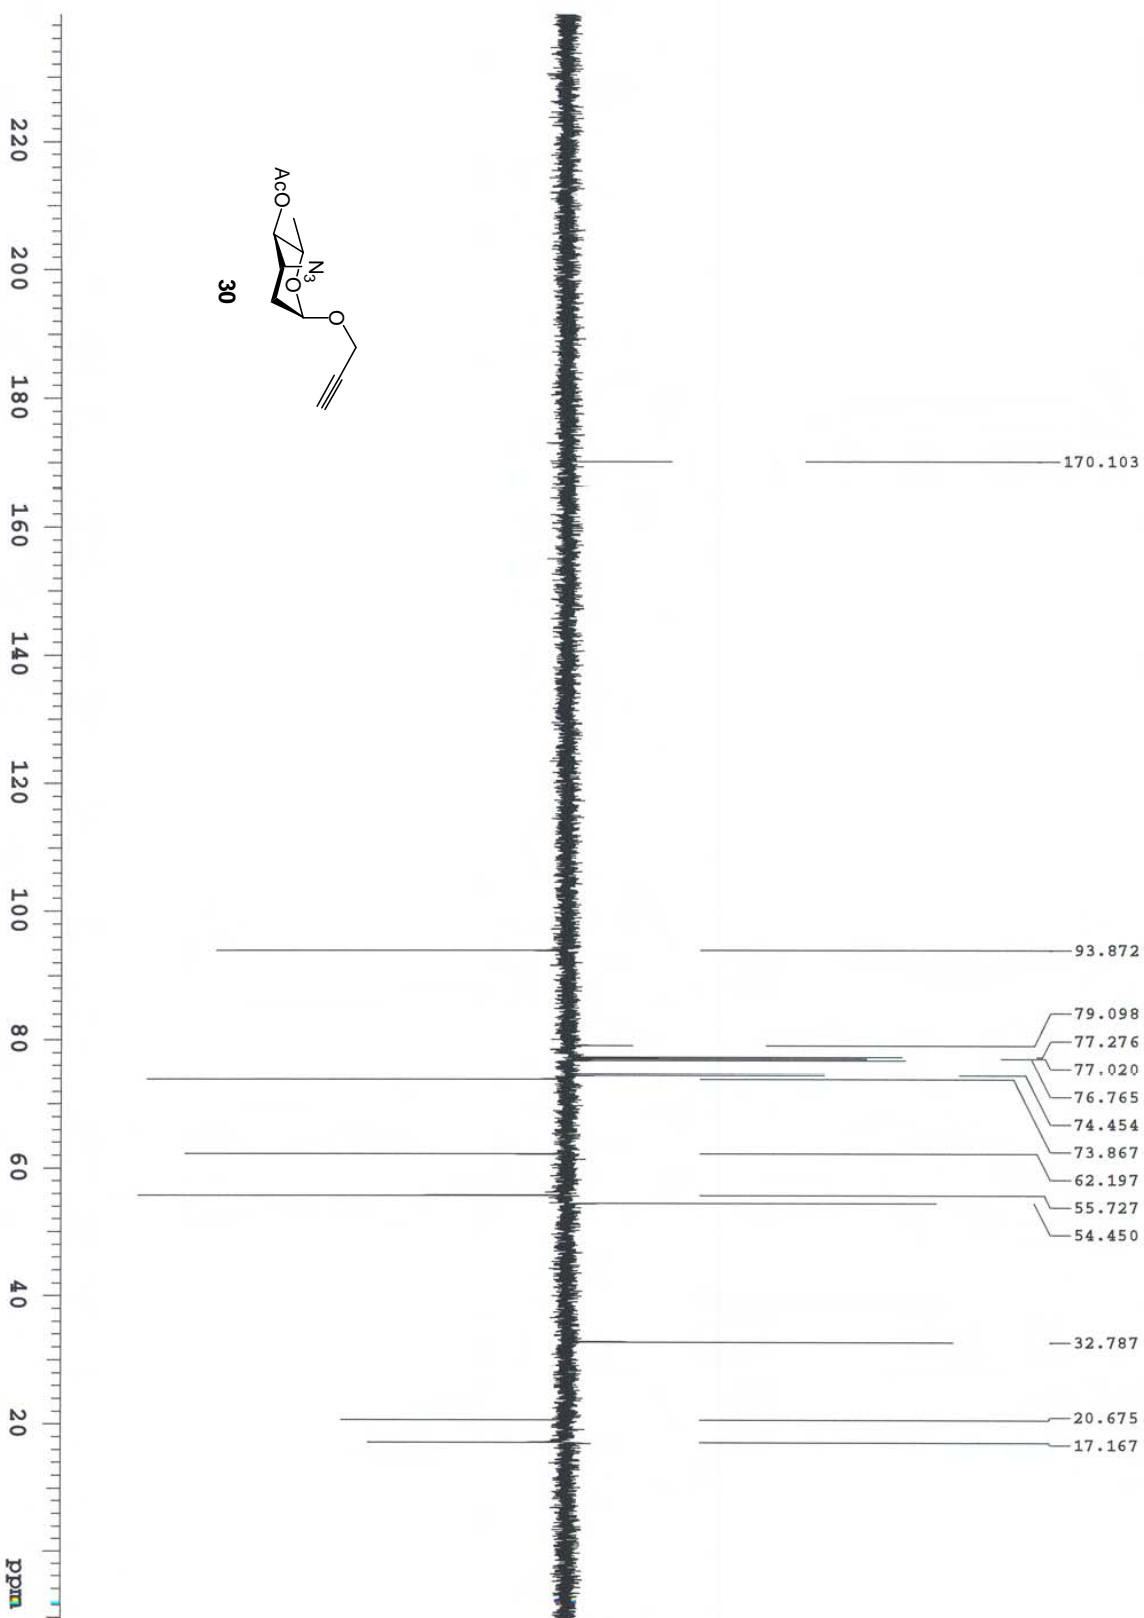

sw-02-135  
500 MHz 1D in CDCl3 (ref. to CDCl3 @ 7.26 ppm), temp 27.2 C -> actual temp = 27.0 C, sw500 probe  
date: Nov 23 2004 sweep width: 5006Hz acq.time: 2.0s relax.time: 3.0s # scans: 16 dig.res.: 0.1 Hz/pt hz/mm:20.9  
spectrometer:d601 file:/cdrom/cdrom#6/101-150/sw-02-135.fid

Pulse Sequence: s2pul

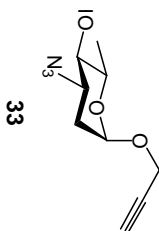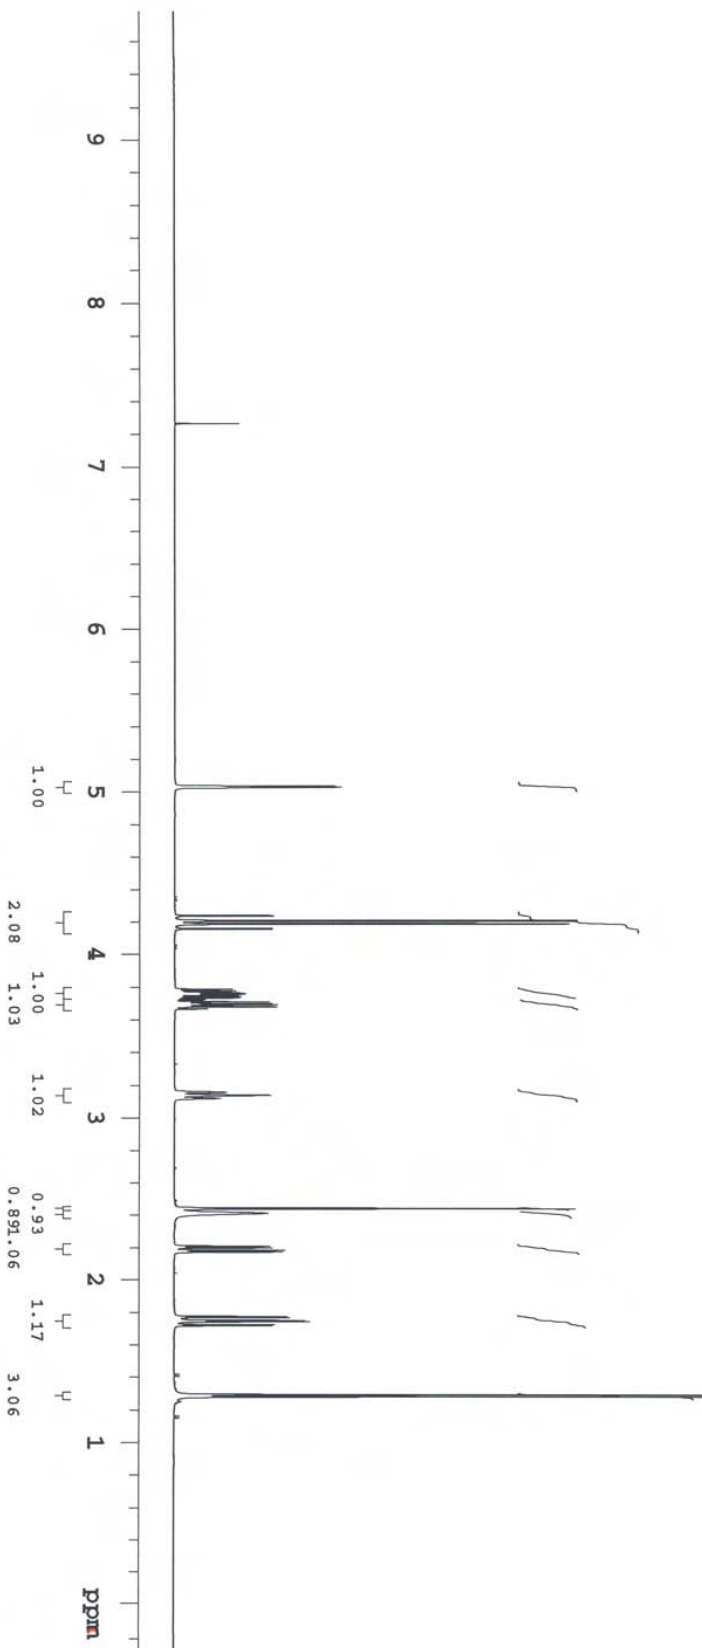

sw-02-135  
 125 MHz APF in CDCl3 (ref. to CDCl3 @ 77.0 ppm), temp 27.2 C -> actual temp = 27.0 C, sw probe  
 data: 2004-04-24 14:44:34.444 Hz acquisition: 336 # scans: 336 dig.res.: 0.5 Hz/pt hz/mm: 130.4  
 file: /cdrom/cdrom6/101-150/sw-02-135-APF.fid  
 spectrometer: d601

Pulse Sequence: apt

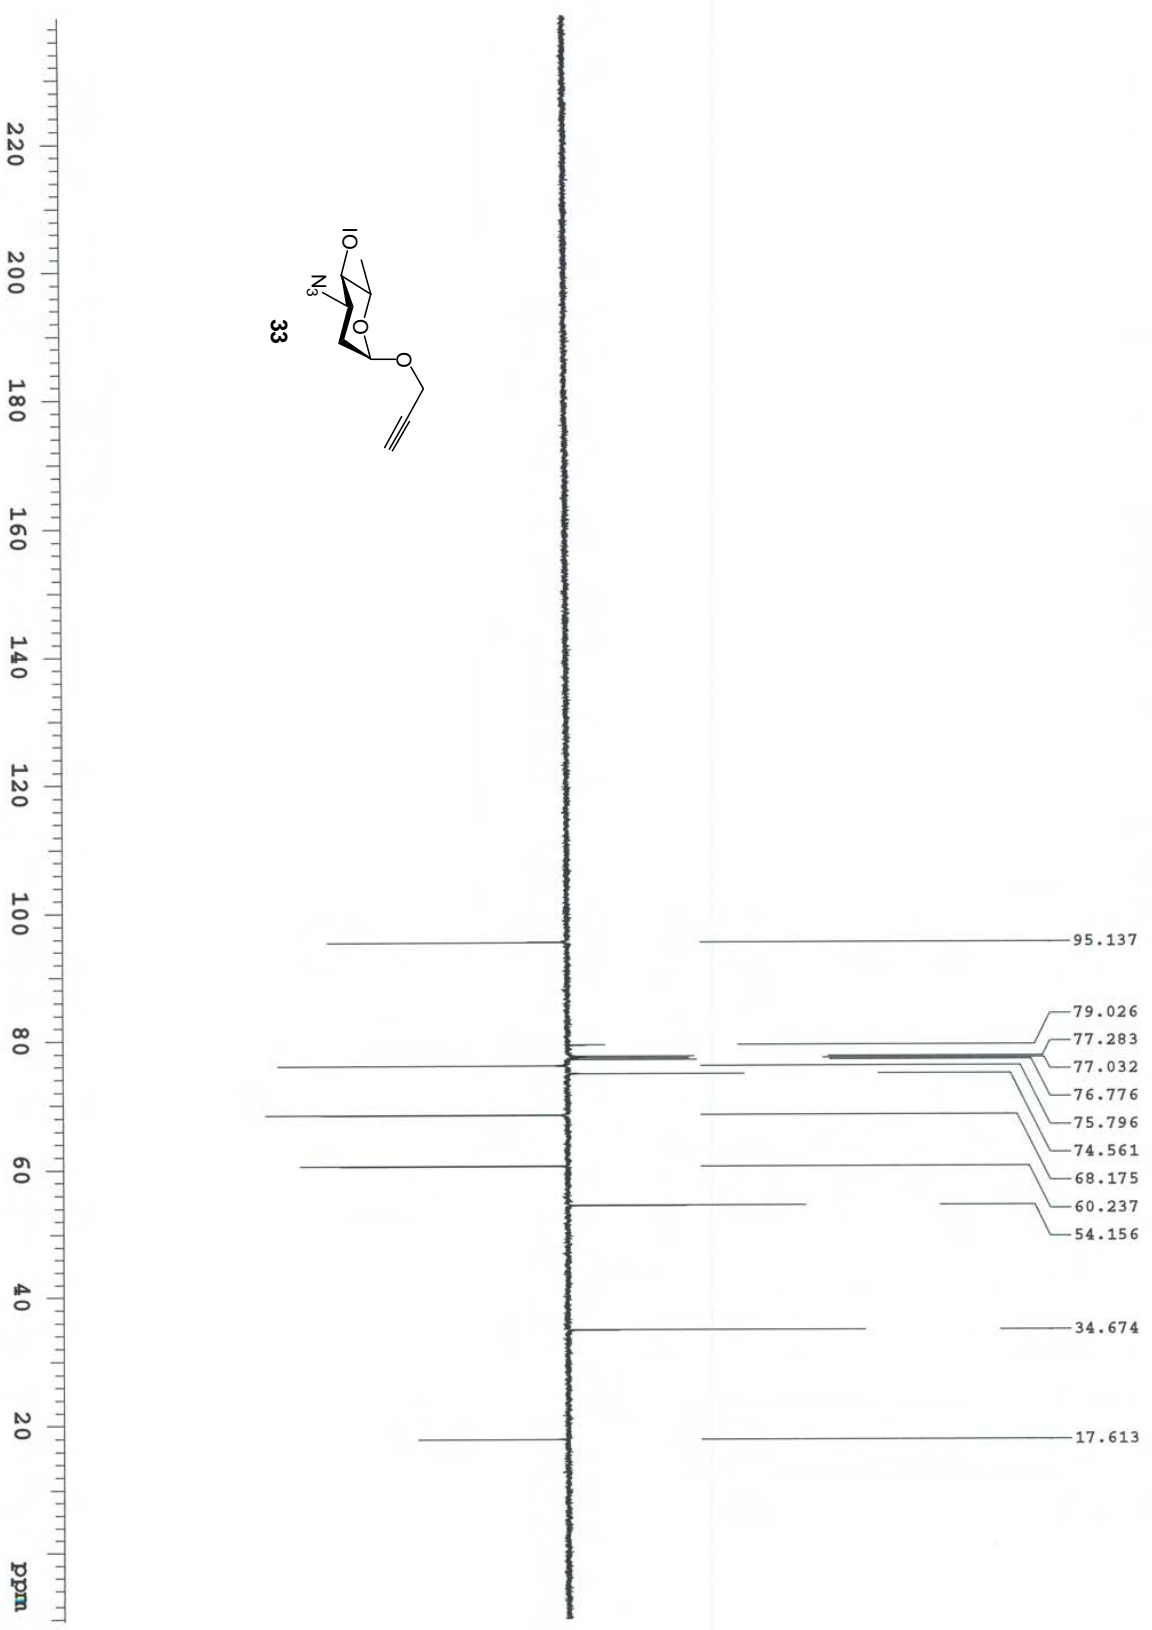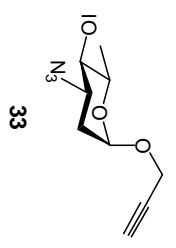

SW-02-151  
500 MHz ID 1h CDCl3 (ref. to CDCl3 @ 7.26 ppm), temp 27.2 C -> actual temp = 27.0 C, sw500 probe  
date: Dec 6 2004 sweep width: 5006Hz acq.time: 2.0s relax.time: 3.0s # scans: 16 dig.res.: 0.1 Hz/pt hz/mm:20.9  
spectrometer:d601 file:/cdrom/cdrom#6/151-184/sw-02-151.fid

Pulse Sequence: s2pu1

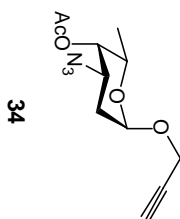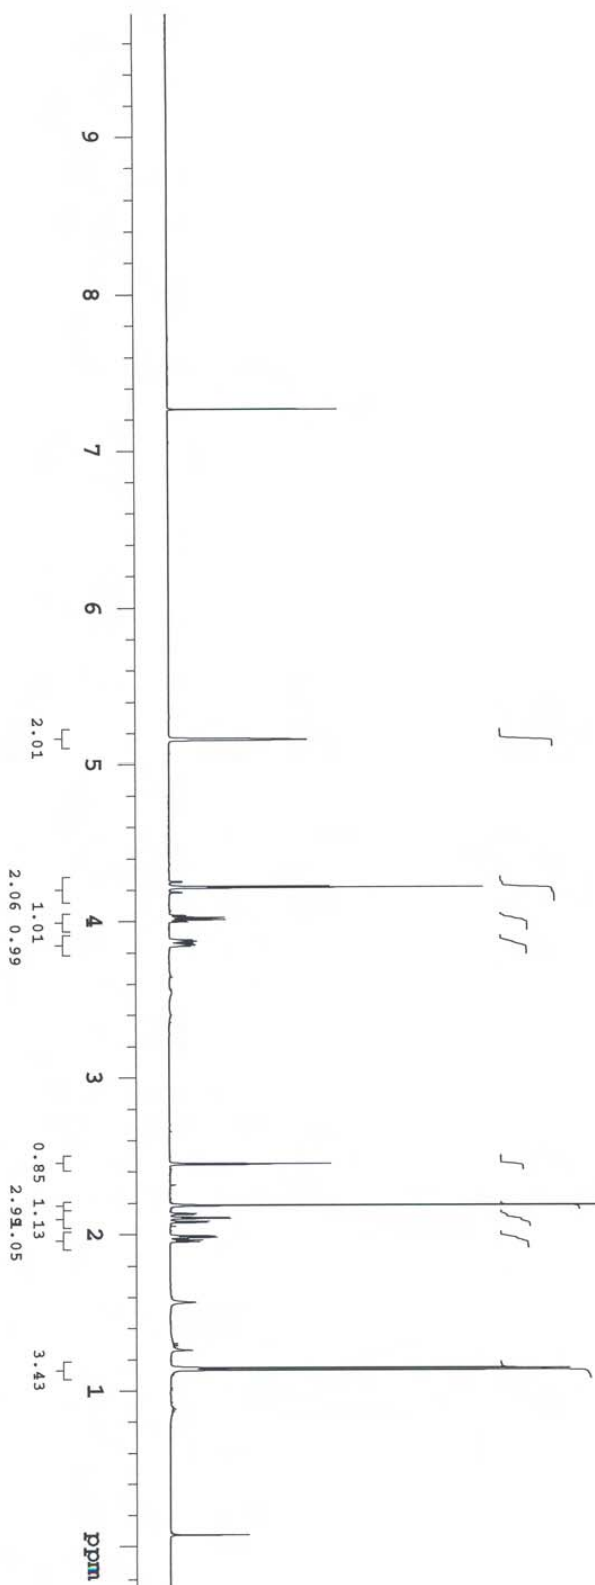



sw-02-151  
125 MHz APF in CDCl3 (ref. to CDCl3 @ 77.0 ppm), temp 27.2 C -> actual temp = 27.0 C, sw probe  
date: 06Apr 2004, time: 11:34, file: /cdrom/cdrom6/151-184/sw-02-151-APF.fid # scans: 344 dig.res.: 0.5 Hz/pt hz/mm: 130.4  
Spectrometer: 4601

Pulse Sequence: apt

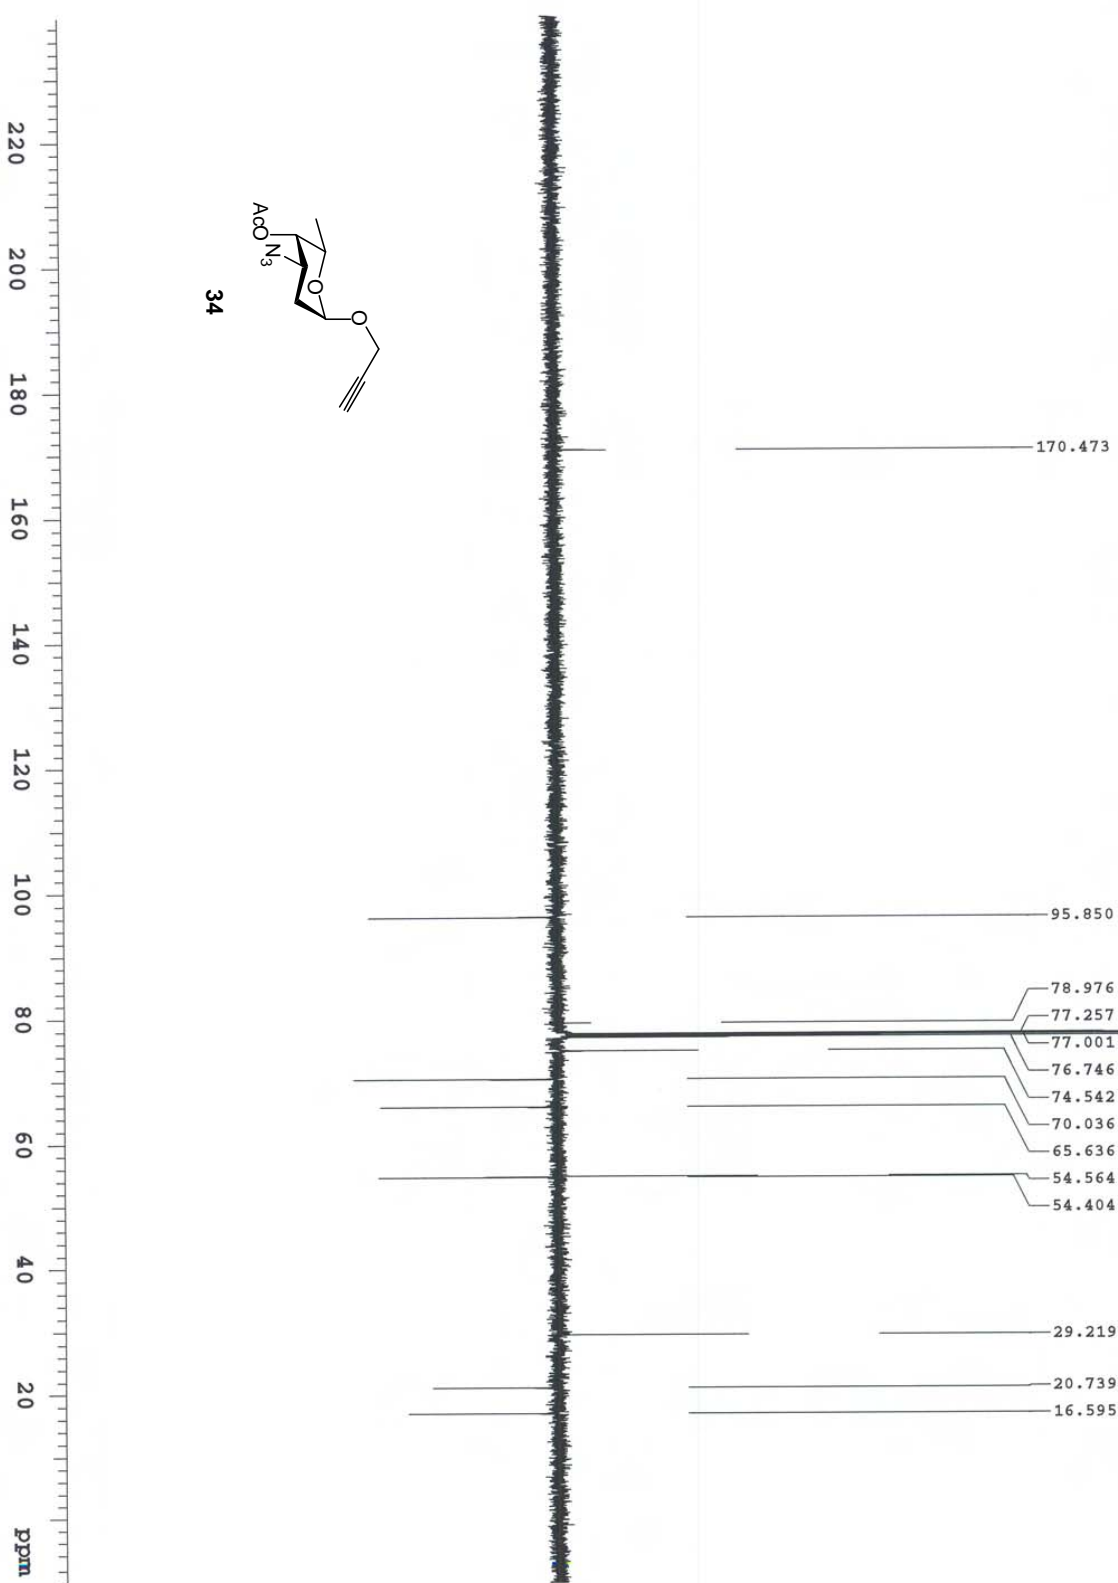

sw-03-101  
500 MHz 1D in CDCl3 (ref. to CDCl3 @ 7.26 ppm), temp 27.2 C -> actual temp = 27.0 C, sw500 probe  
date: Aug 10 2005 sweep width: 6001Hz acq.time: 2.0s relax.time: 3.0s # scans: 1 dig.res.: 0.1 Hz/pt hz/mm: 25.0  
spectrometer:d601 file:/mnt/d600/home9/tllmr/nmrdata/we1.shi/Project 1-book 3/101-208/sw-03-101.fid

Pulse Sequence: s2pul1

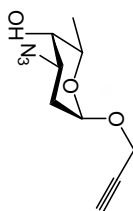

35

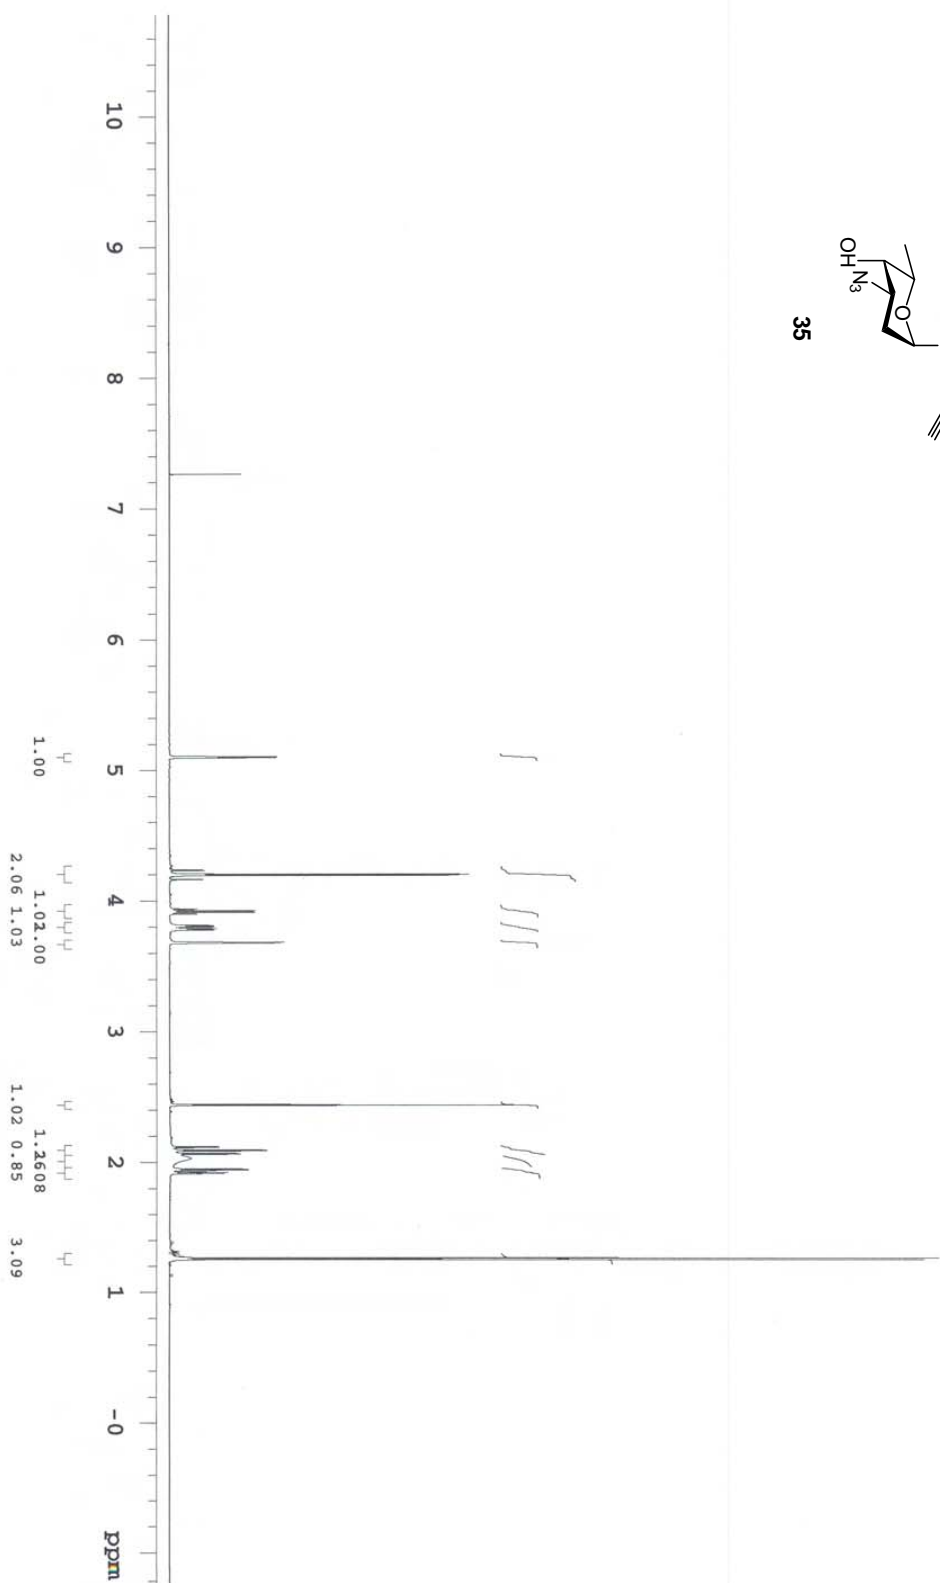

sw-03-101  
125 MHz APPT in CDCl3 (ref. to CDCl3 @ 77.0 ppm), temp 27.2 C -> actual temp = 27.0 C, sw probe  
date: 2005-08-23 10:38:27 Hz: 31250.000 relax.time: 0.1s # scans: 80 dir.res.: 0.5 Hz/pt hz/mm: 140.9  
spectrometer: d601 file: /mnt/d600/home9/tlinnr/nmrdata/wei.shi/Project 1-book 3/101-208/sw-03-101-APPT.fid

Pulse Sequence: apt

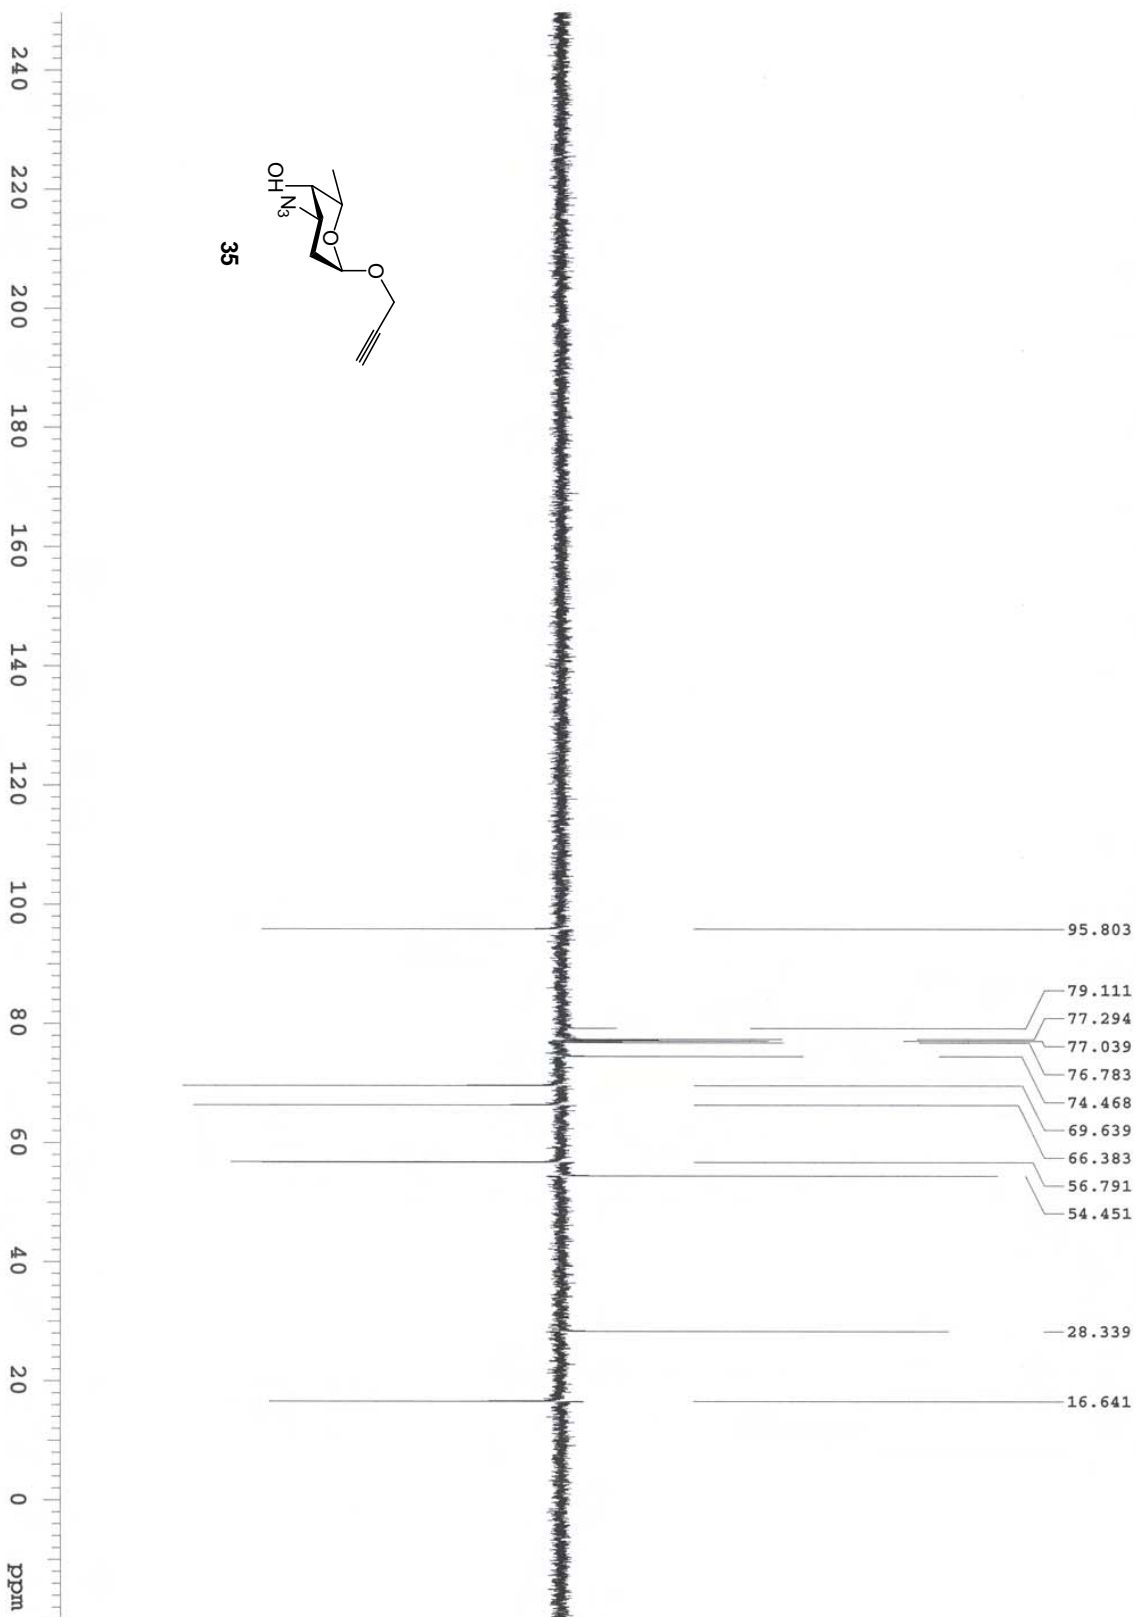

sw-03-147  
500 MHz 1D in CD3OD (ref. to CD3OD @ 3.30 ppm), temp 27.2 C -> actual temp = 27.0 C, sw500 probe  
date: Oct 3 2005 sweep width: 6001Hz acq.time: 2.0s relax.time: 3.0s # scans: 16 dig.res.: 0.1 Hz/pt hz/mm:25.0  
spectrometer:d601 file:/mnt/d600/home9/llimr/nmrdata/wei.shi/Project 1-book 3/101-208/sw-03-147.fid

Pulse Sequence: s2gn1

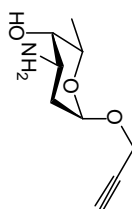

36

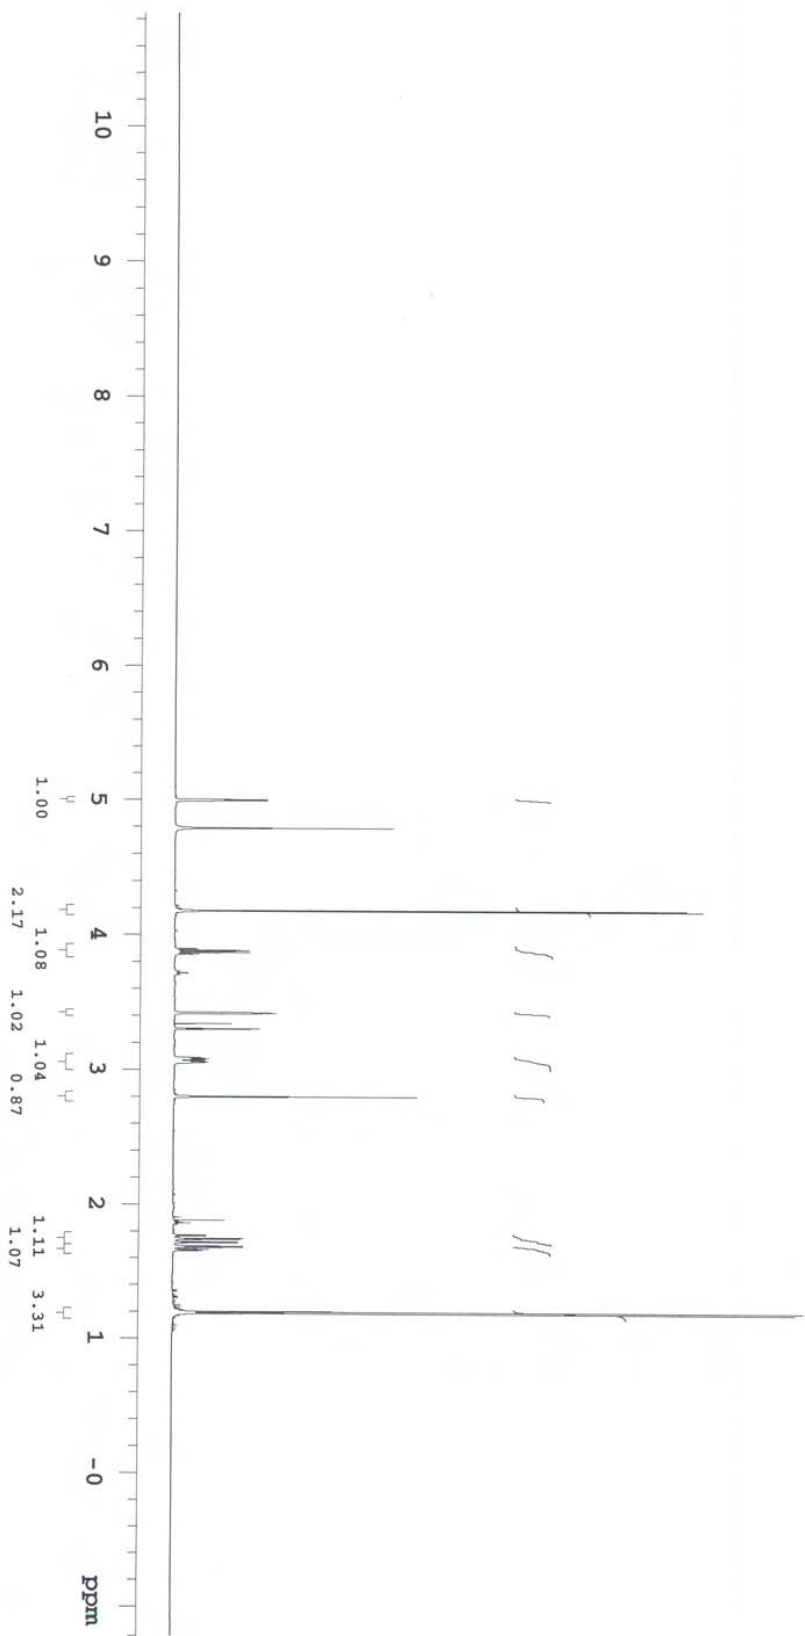

sw-03-109  
125 MHz APY in CD3OD (ref. to CD3OD @ 49.0 ppm), temp 27.2 C -> actual temp = 27.0 C, sw probe  
date: 20040326, 2004% svp: 20040326, 33887 Hz acq: 33887 Hz, 400 scans: 400 dig.res.: 0.5 Hz/pt hz/mm: 140.9  
spectrometer: d601 file: /mnt/d600/home9/cilmnr/mrdata/wel.shi/Project 1-book 3/101-208/sw-03-109-APY.fid

Pulse Sequence: apt

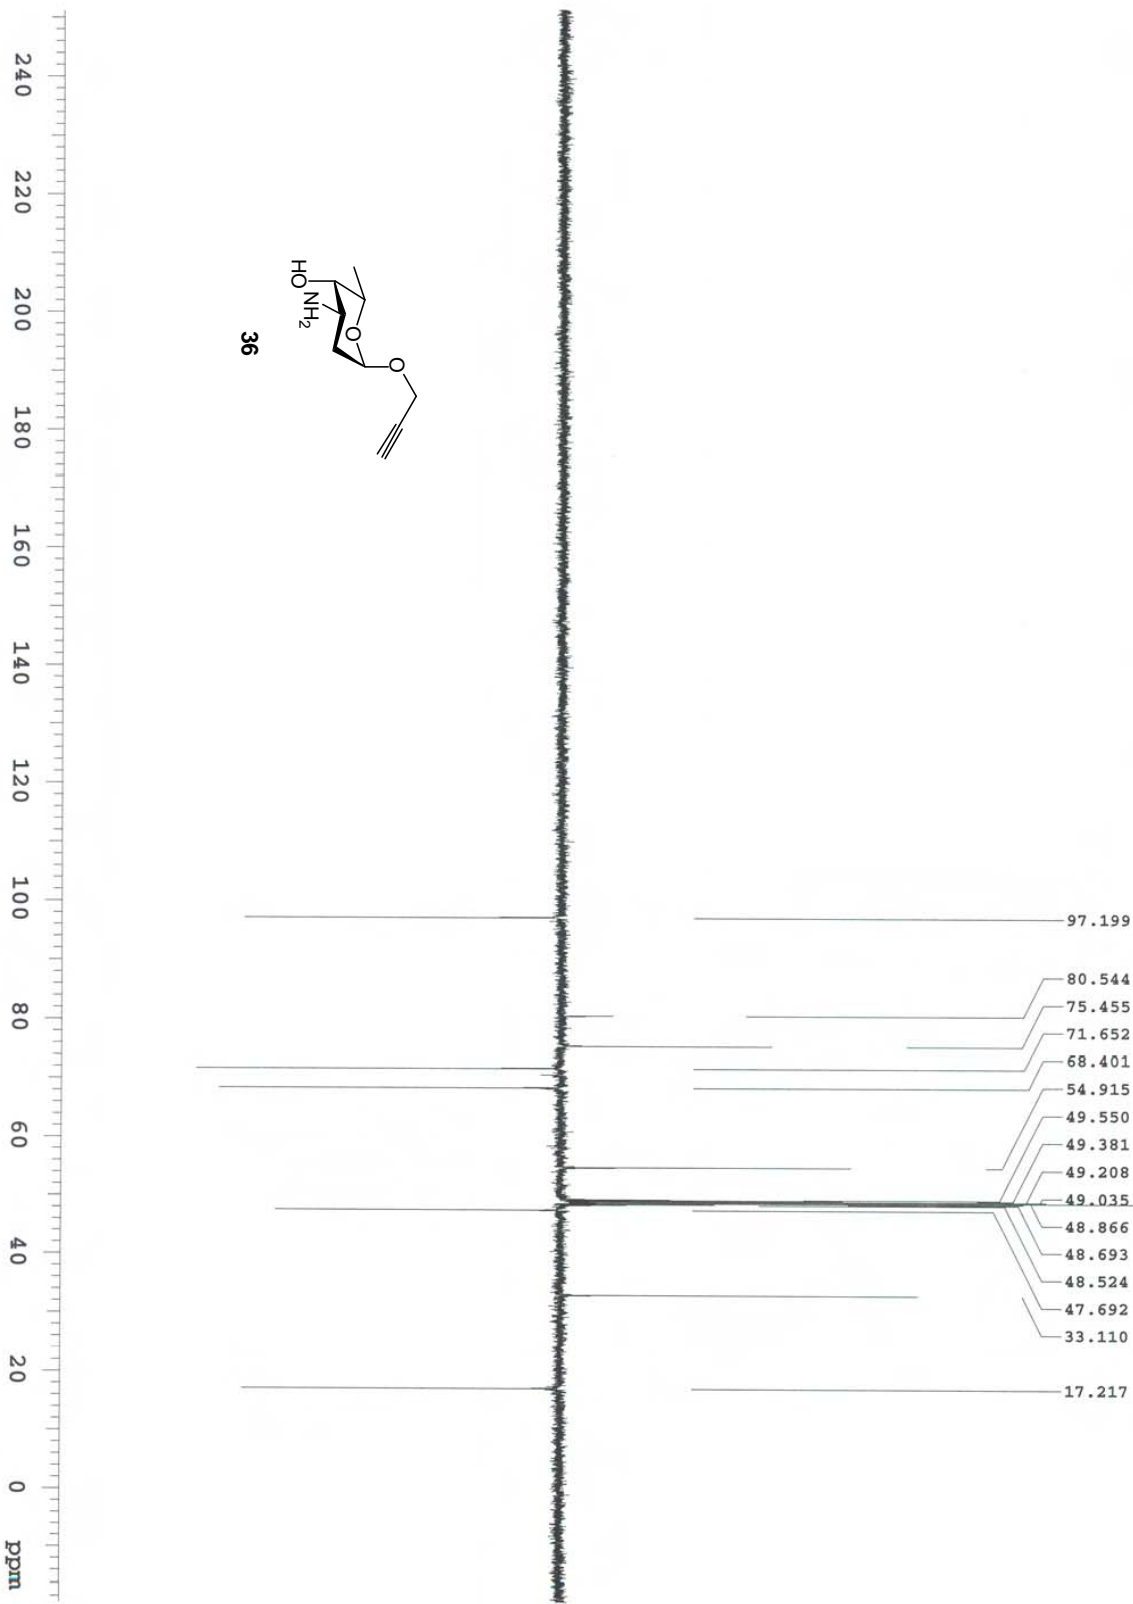

SW-02-175  
 500 MHz 1D In CD3OD (ref. to CD3OD @ 3.30 ppm), temp 27.2 C -> actual temp = 27.0 C, sw500 probe  
 date: Jan 15 2005 sweep width: 5006Hz acq.time: 2.0s relax.time: 3.0s # scans: 16 dig.res.: 0.1 Hz/pt hz/mm: 20.9  
 spectrometer:d601 file:/cdrom/cdrom#6/151-184/sw-02-175.fid

Pulse Sequence: s2pnl

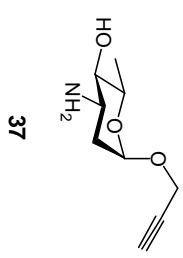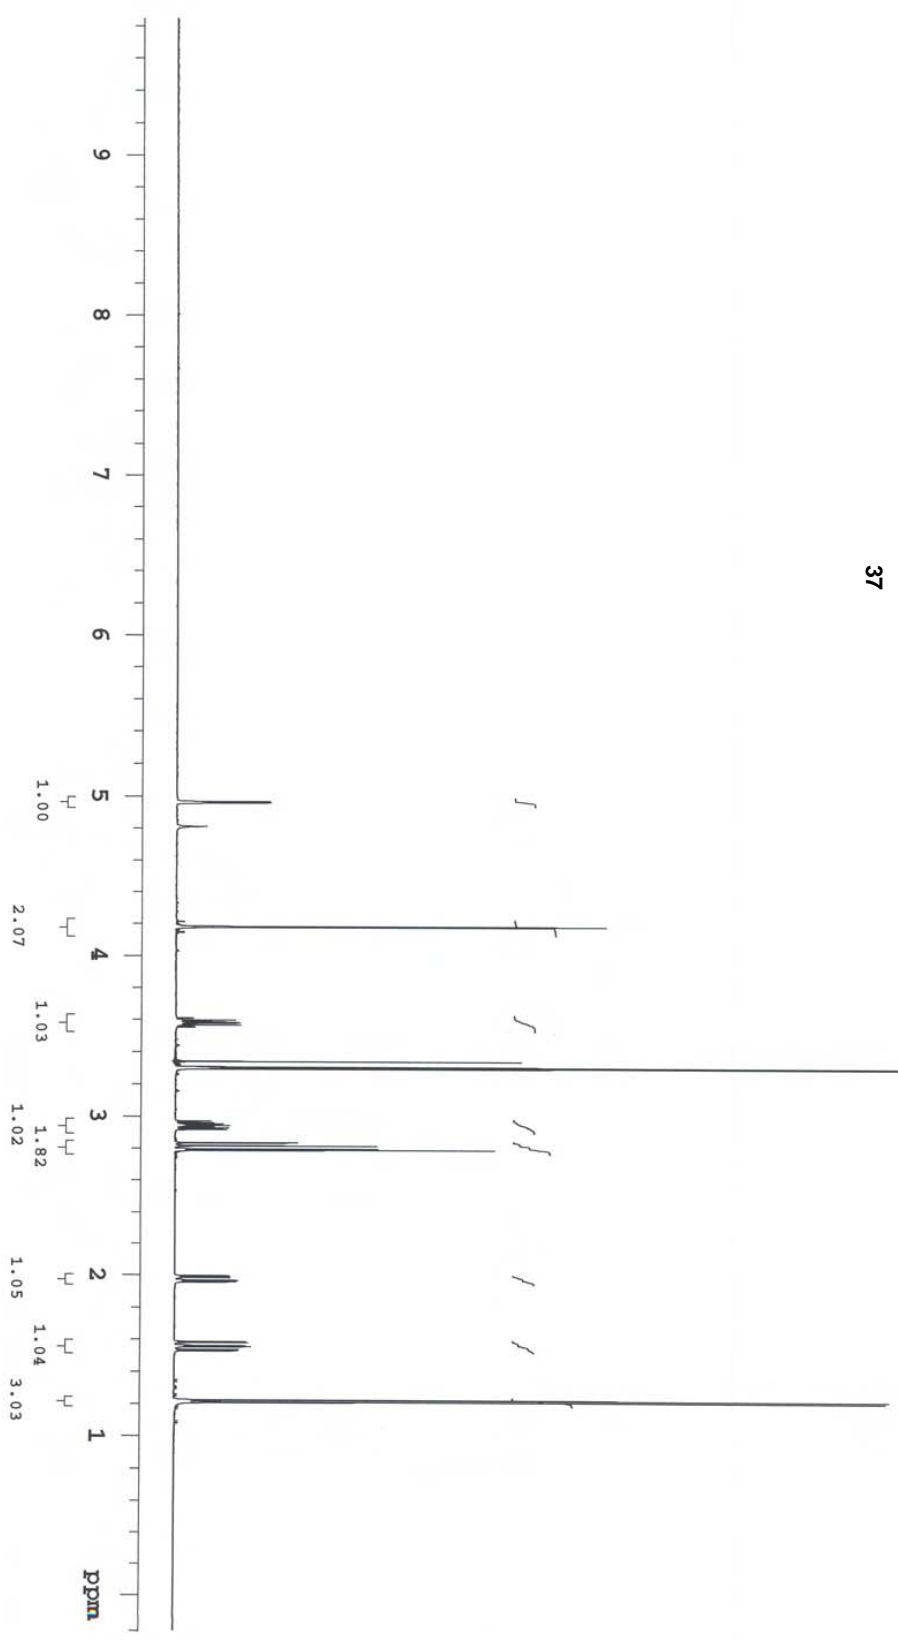

sw-02-175  
 100 MHz APR in CD3OD (ref. to CD3OD @ 49.0 ppm), temp 27.0 C -> actual temp = 27.0 C, m400gz probe  
 Pulse Sequence: apt  
 Date: 2017-04-11 14:28:28 File: /mnt/d600/home9/clinmr/nmrdata/we1.shi/Saver/sw-02-175-APR.fid  
 dig.res.: 0.4 Hz/pt hz/mm:112.6  
 spectrometer:d601

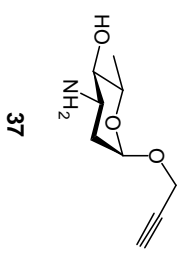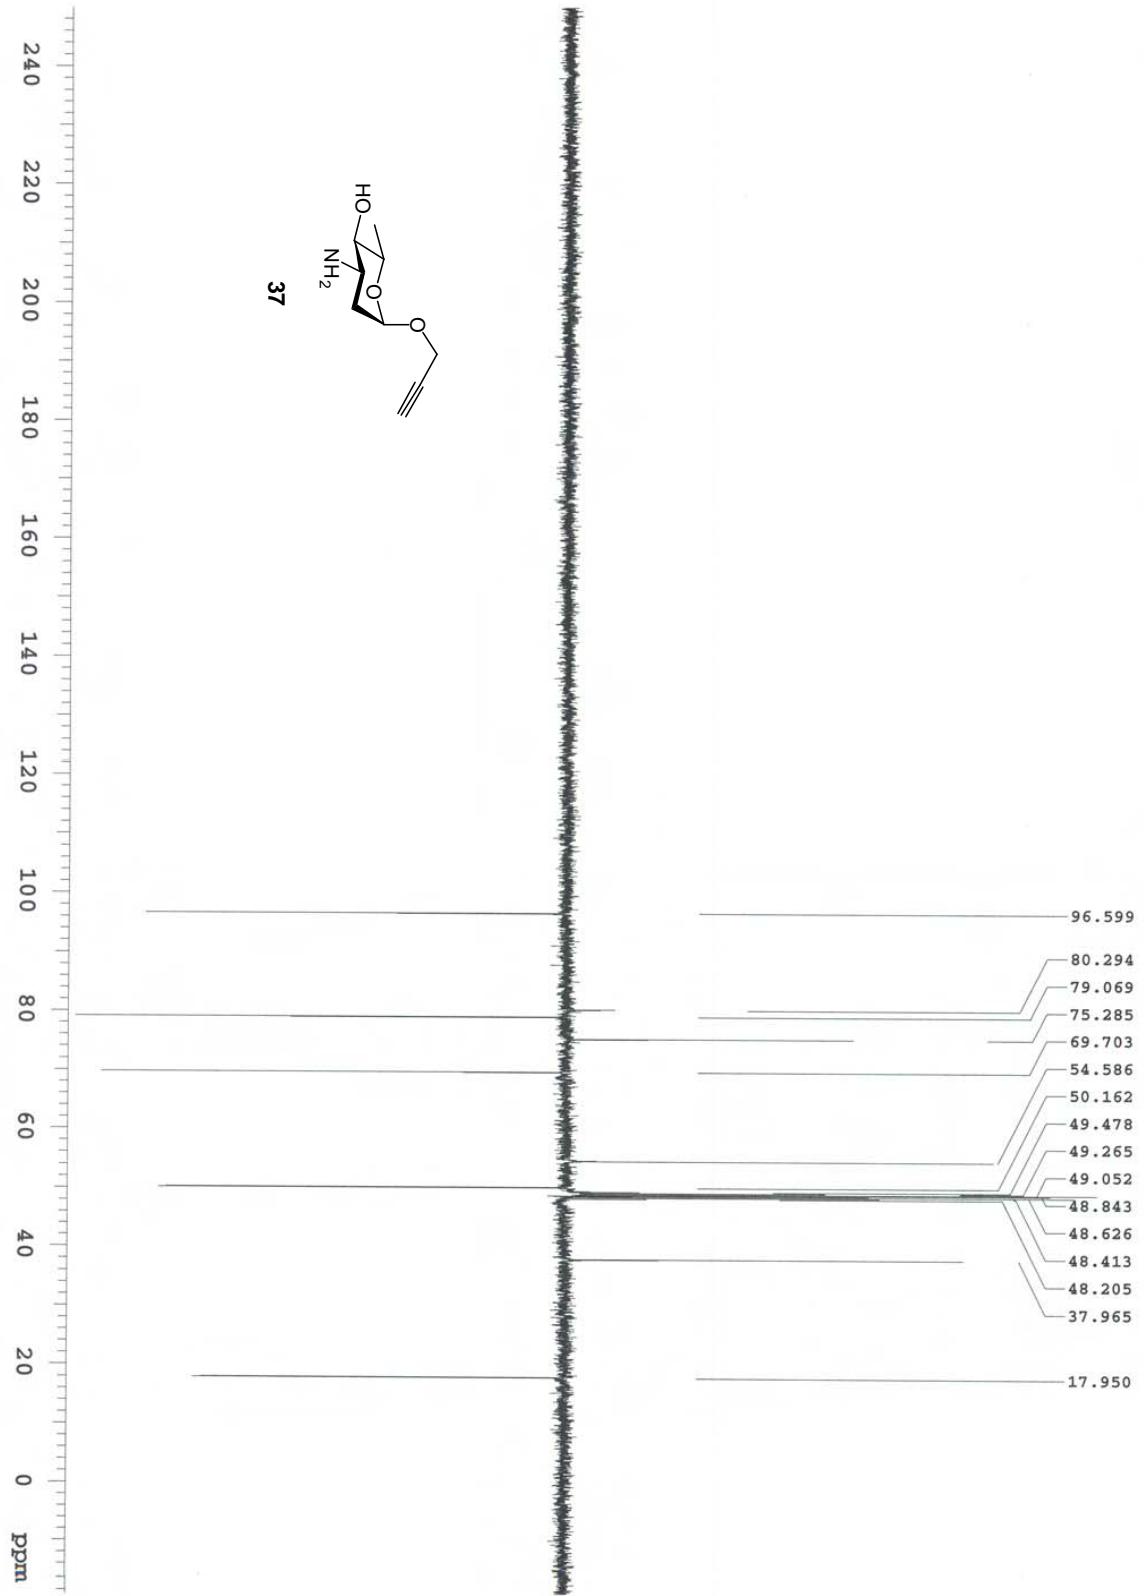

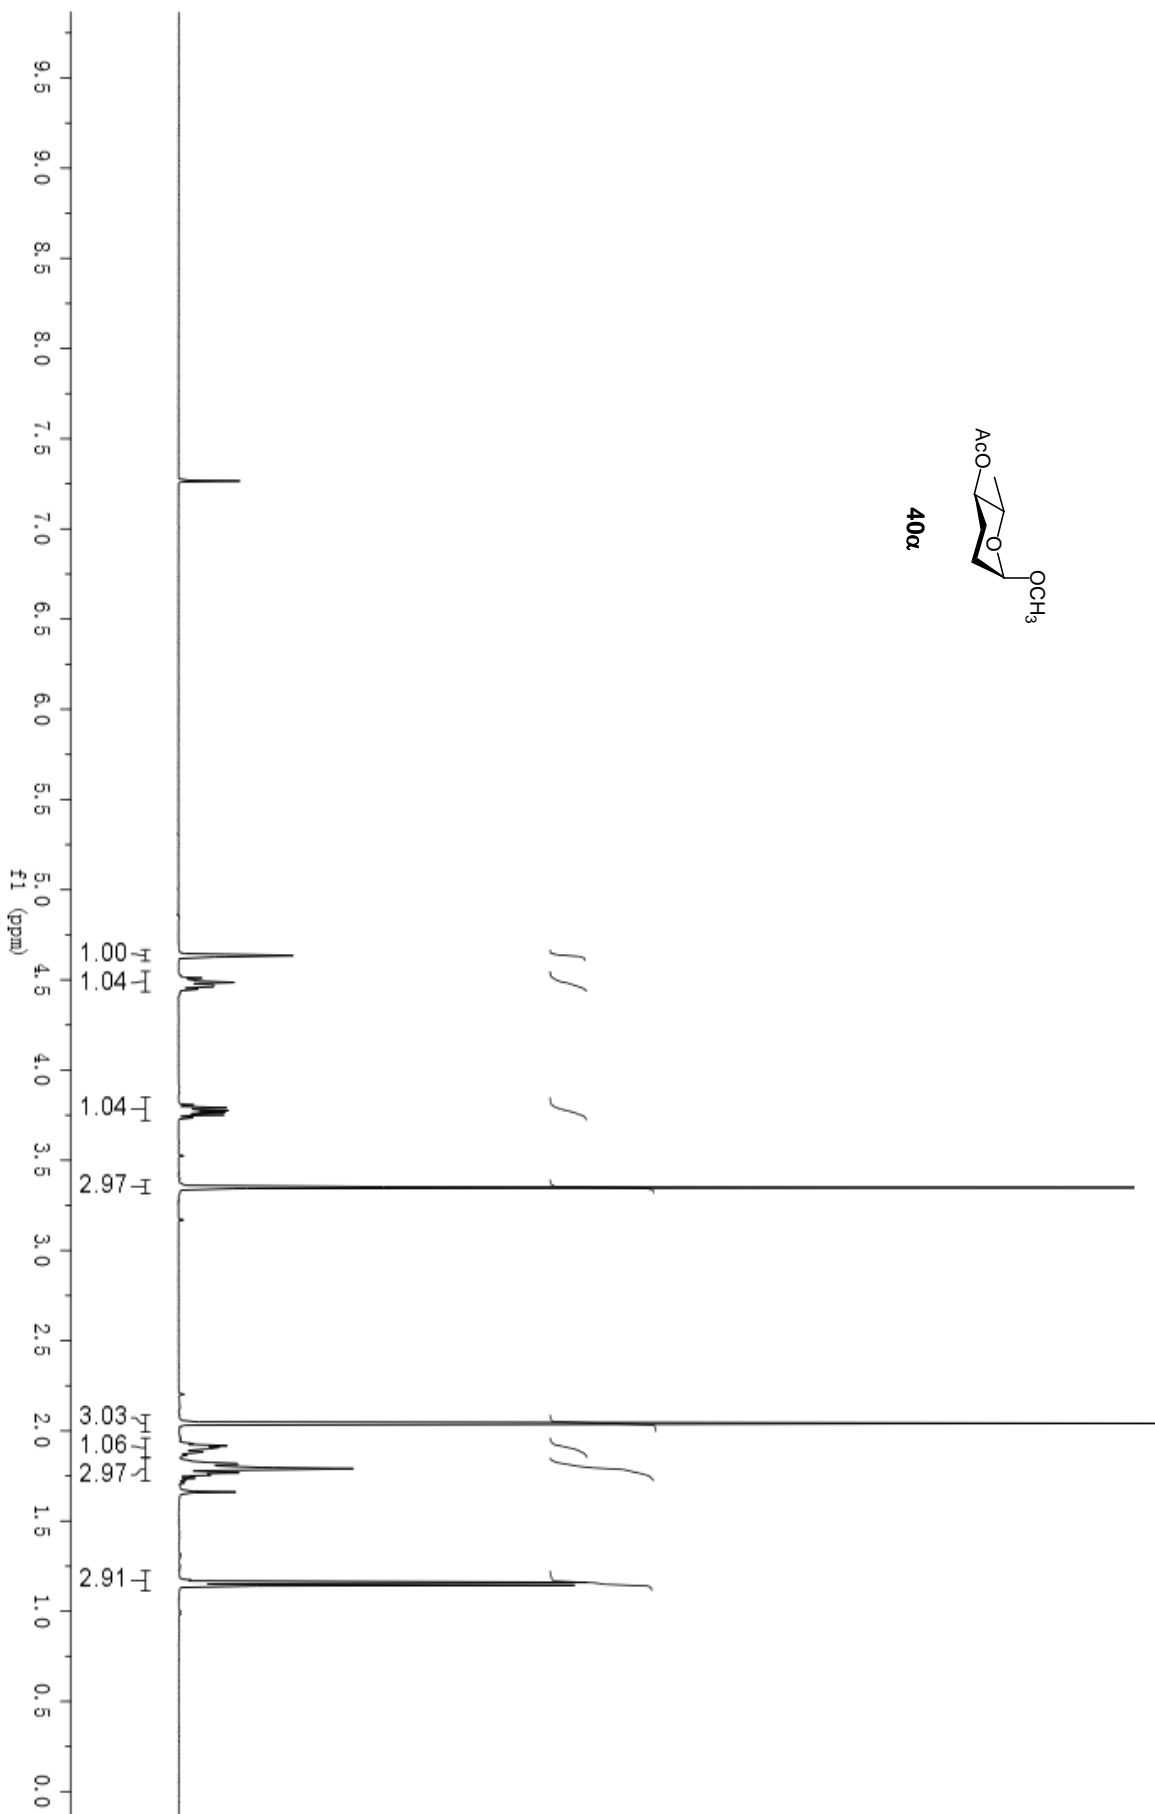



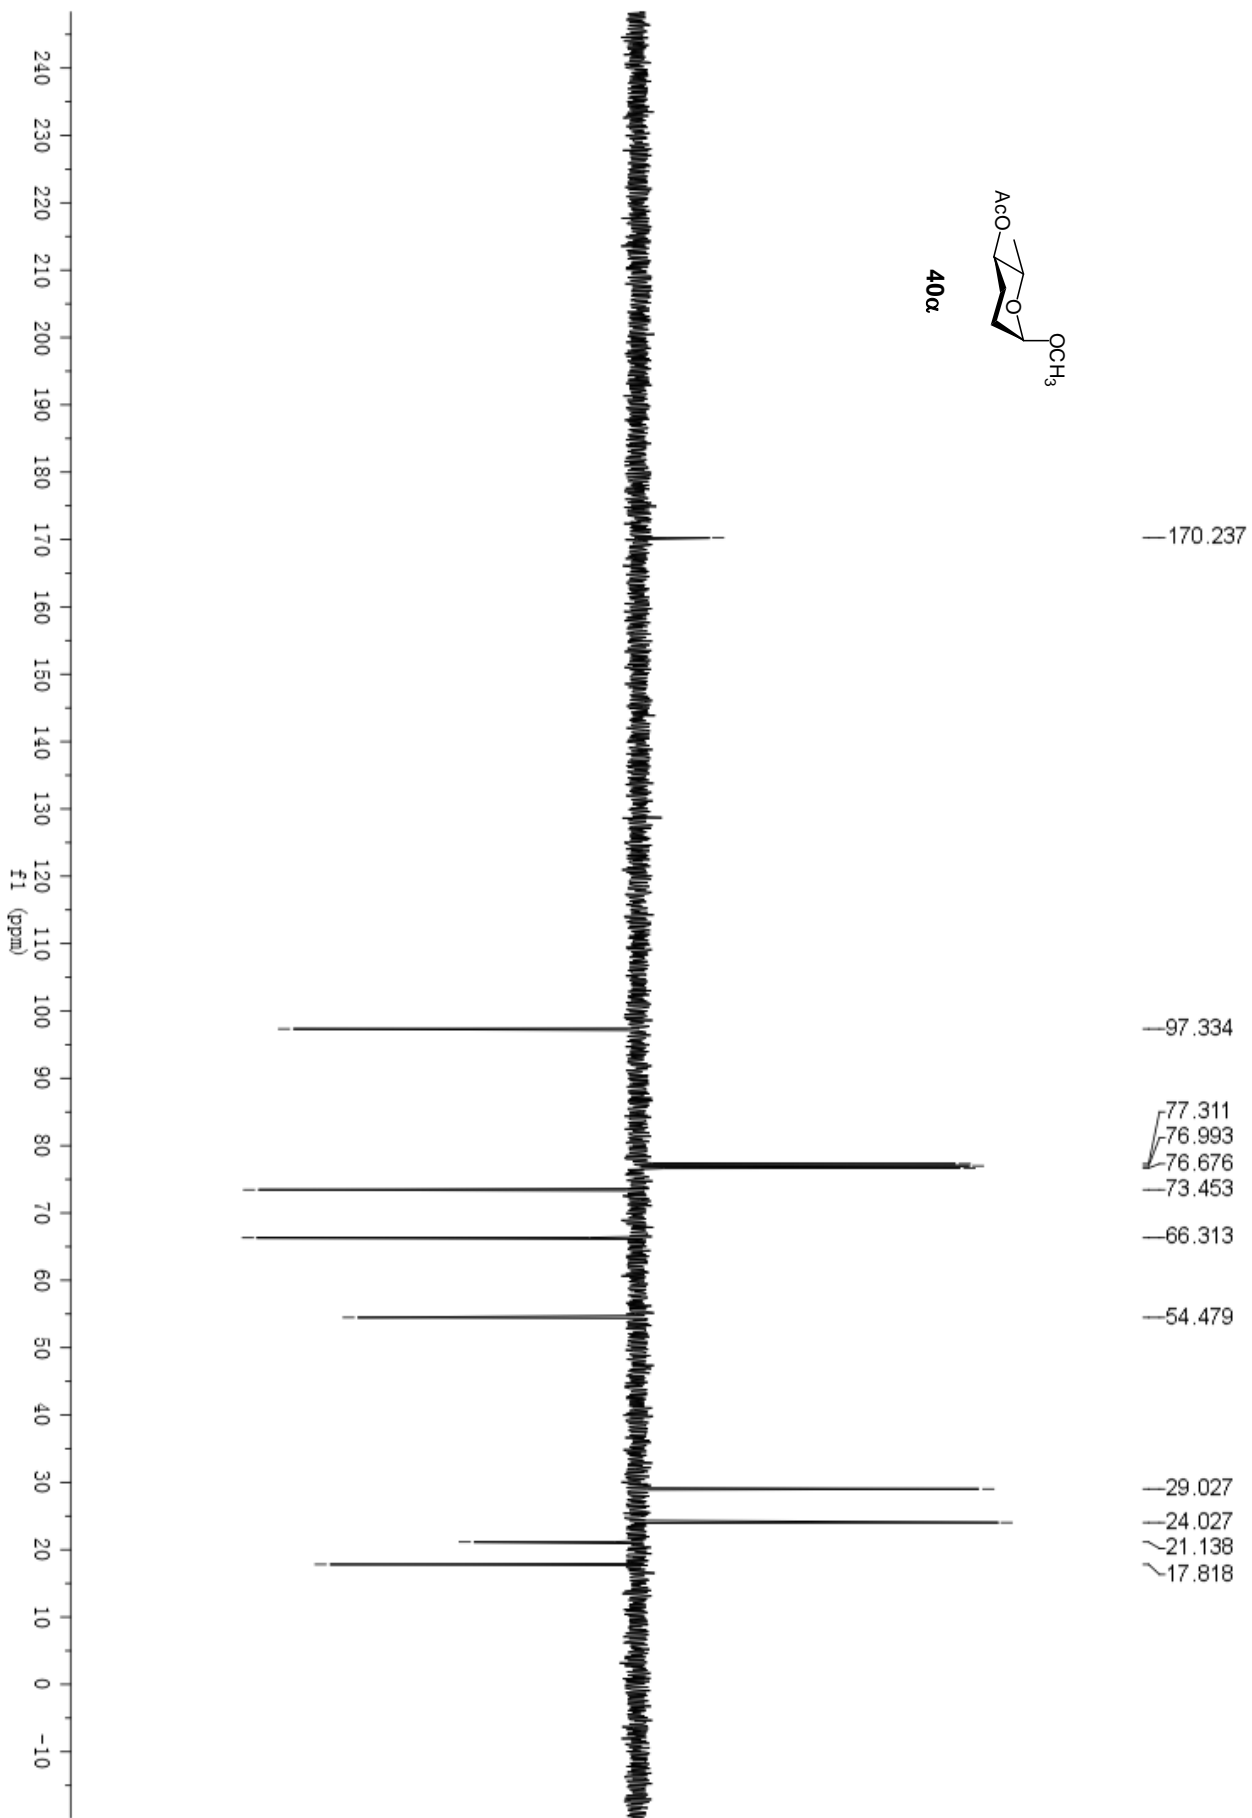

S73

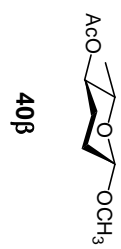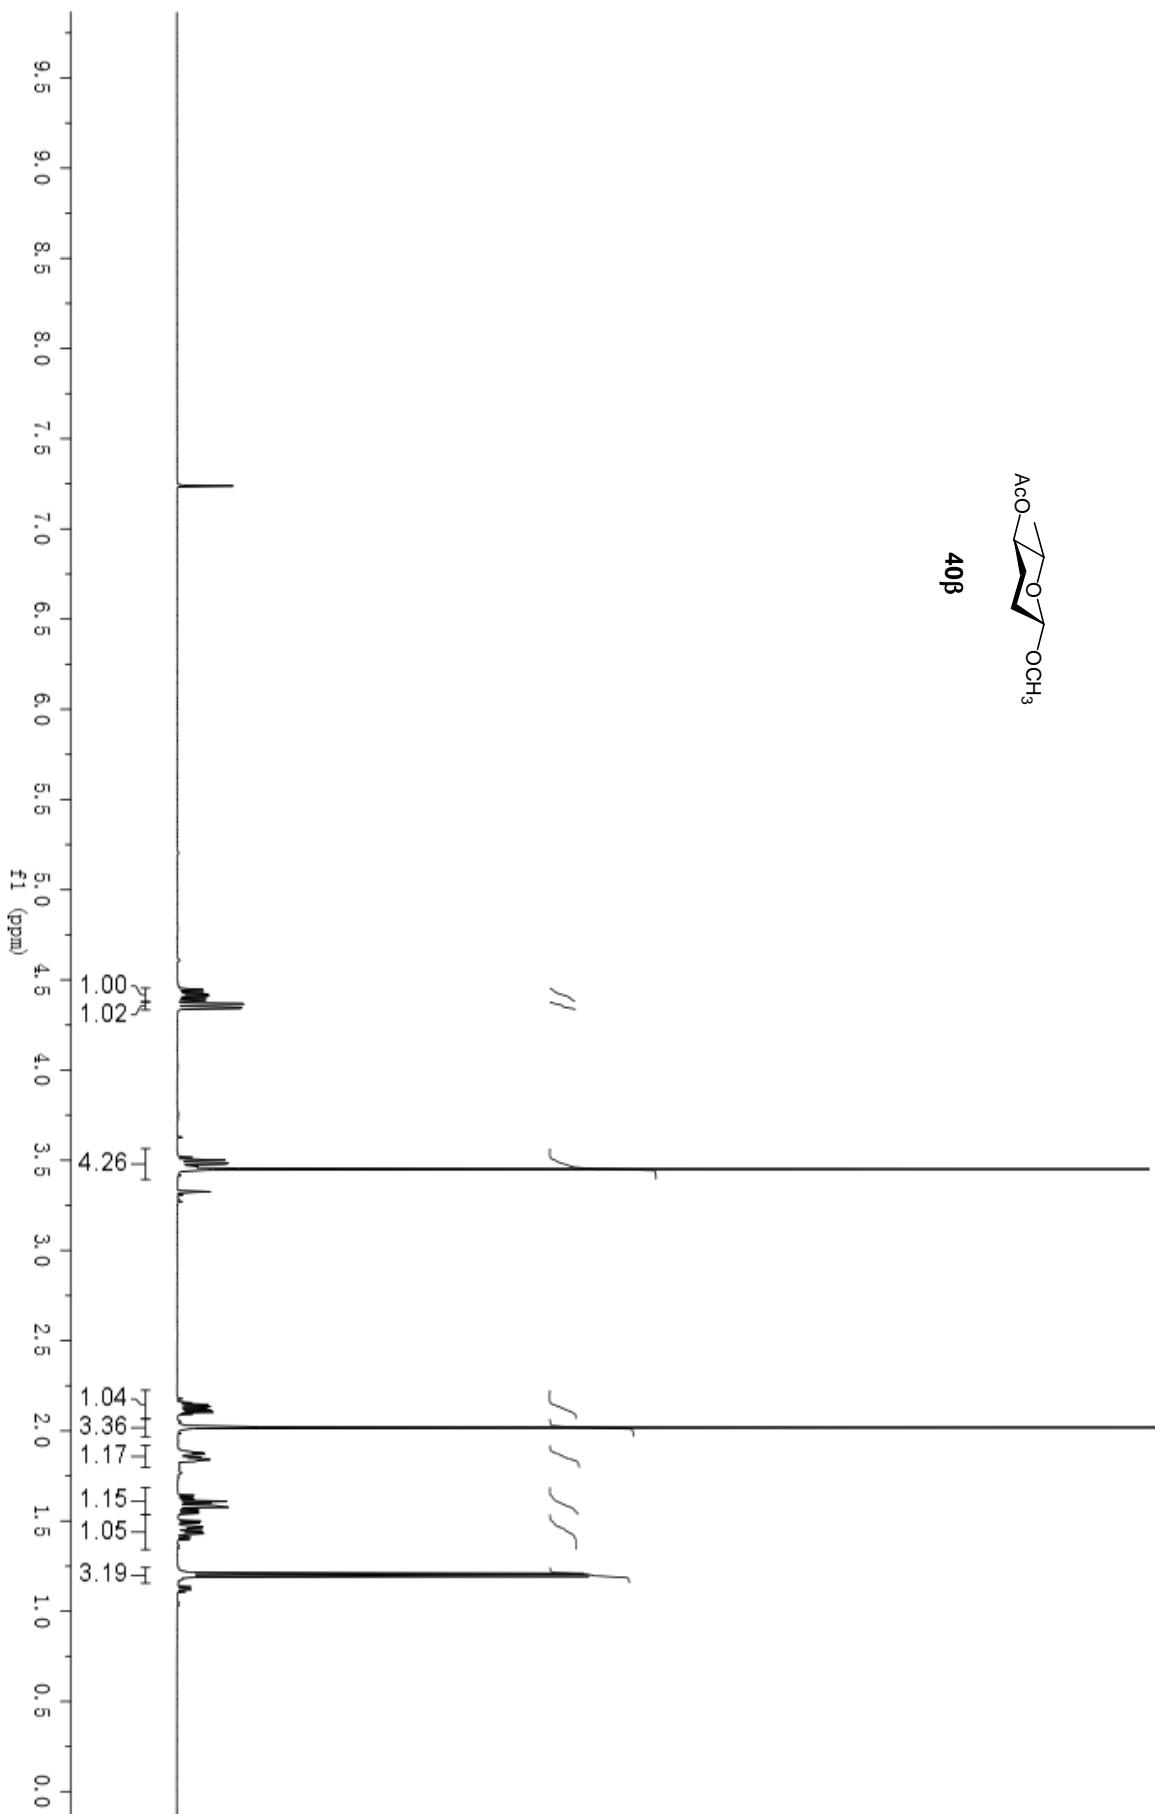

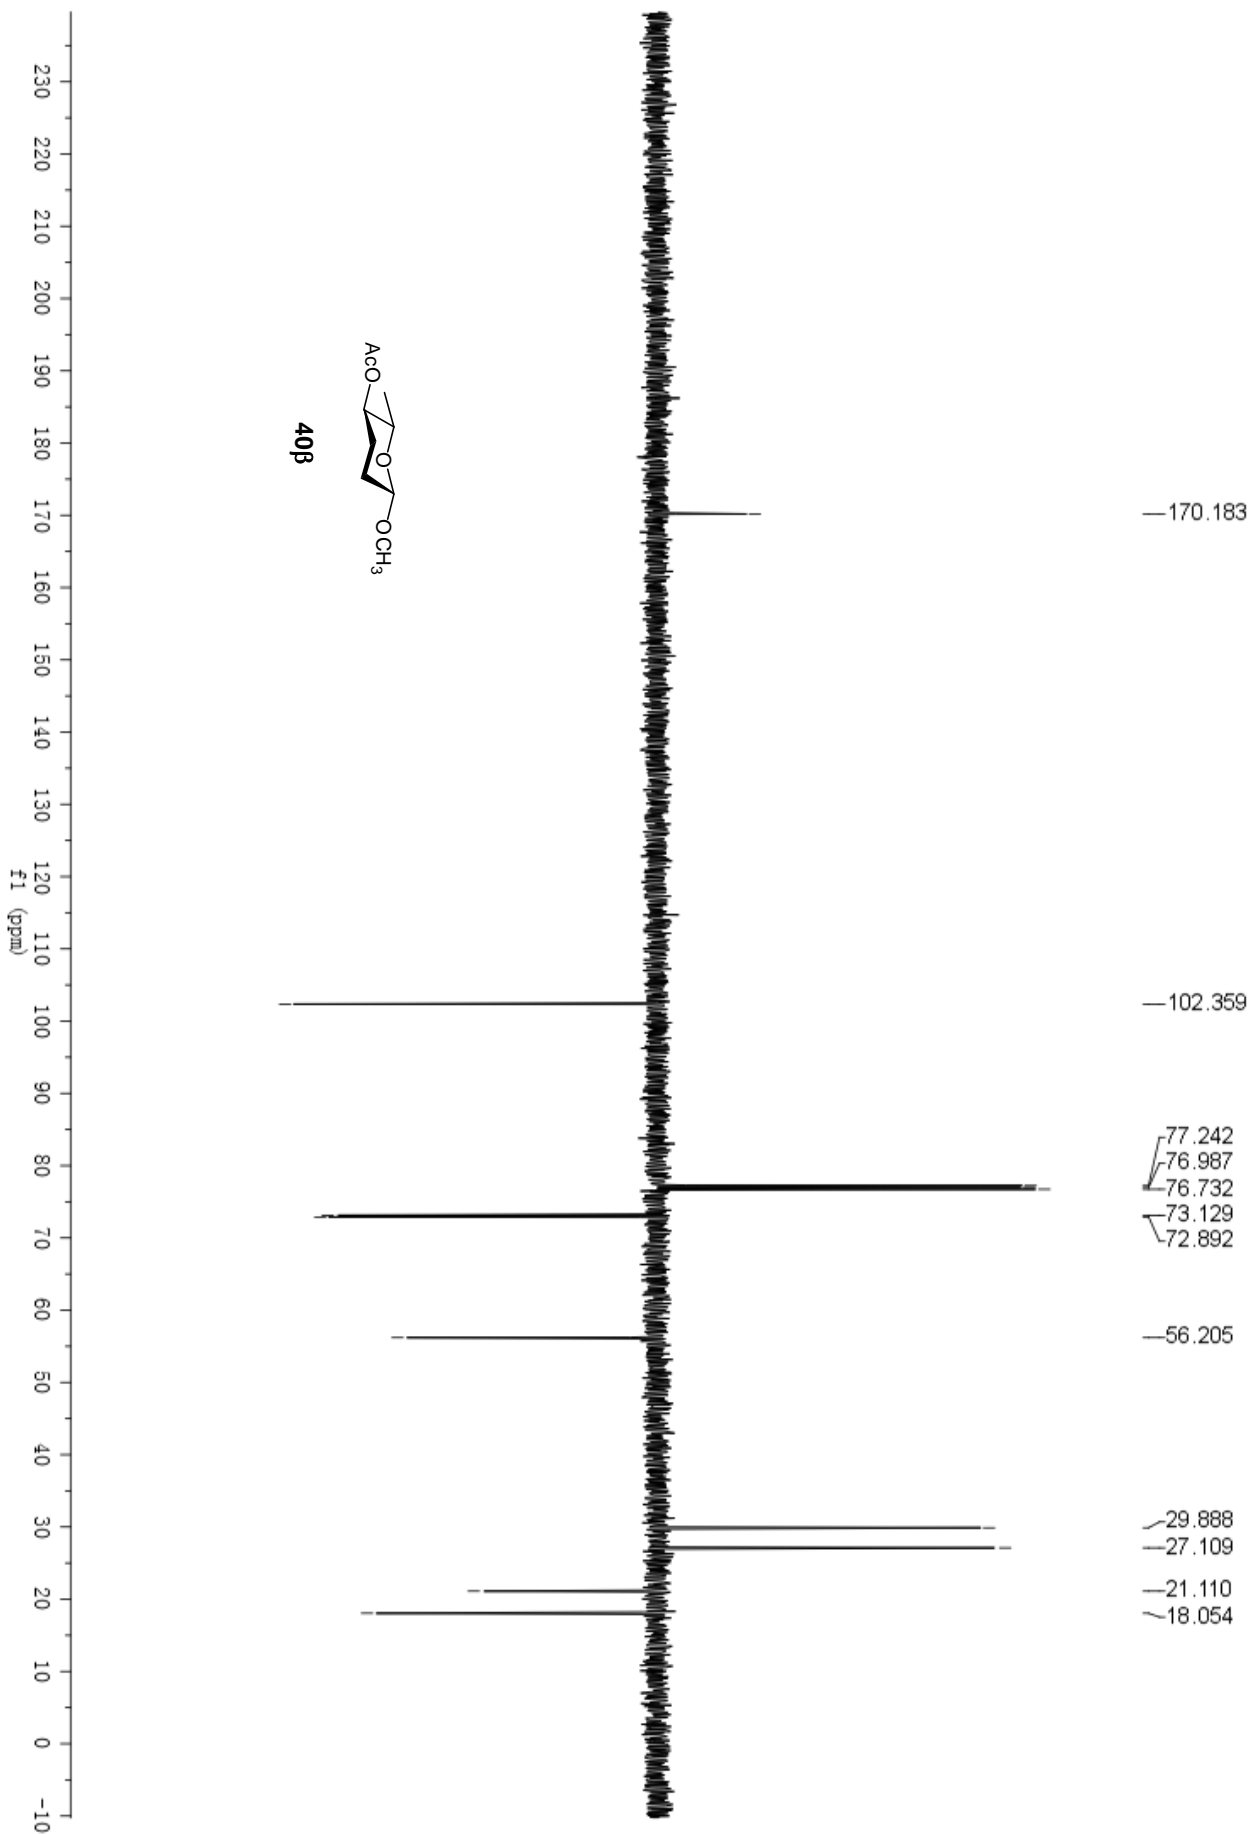

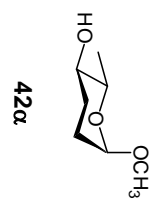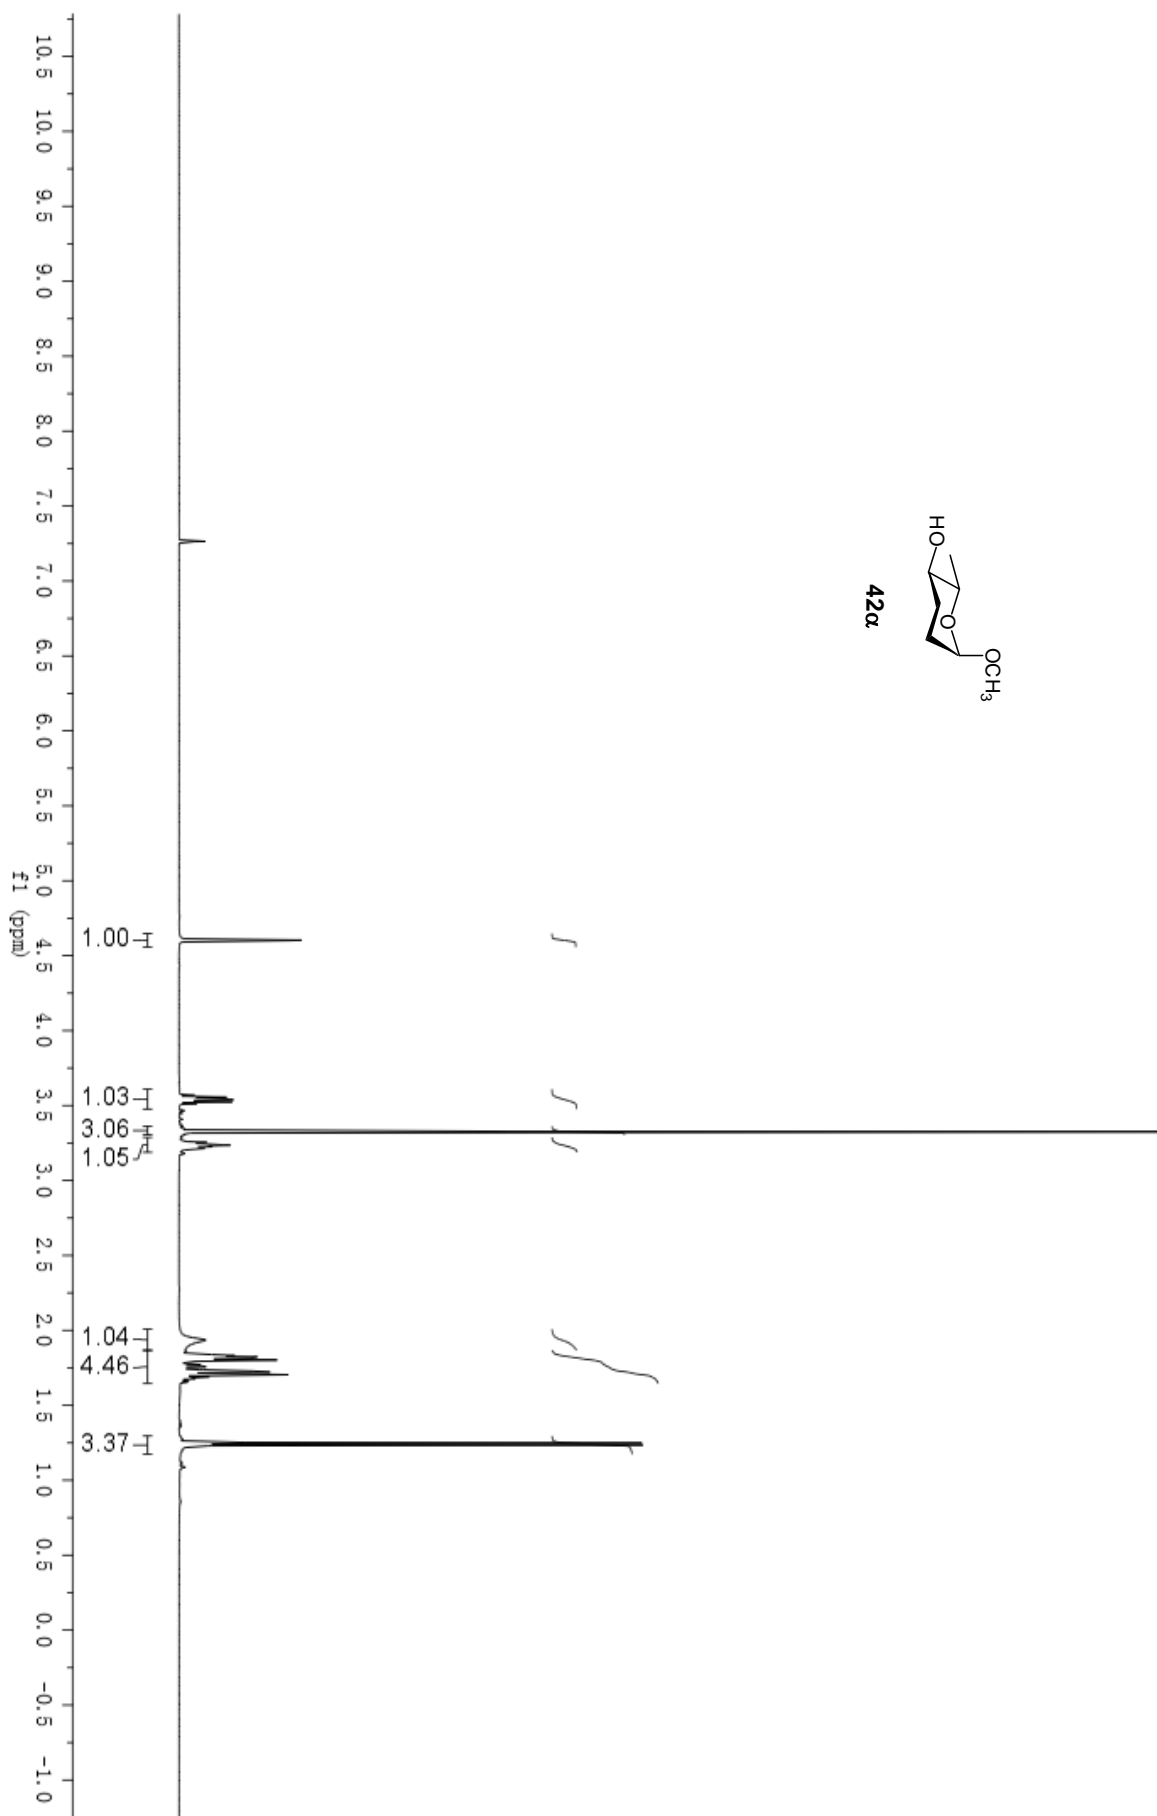

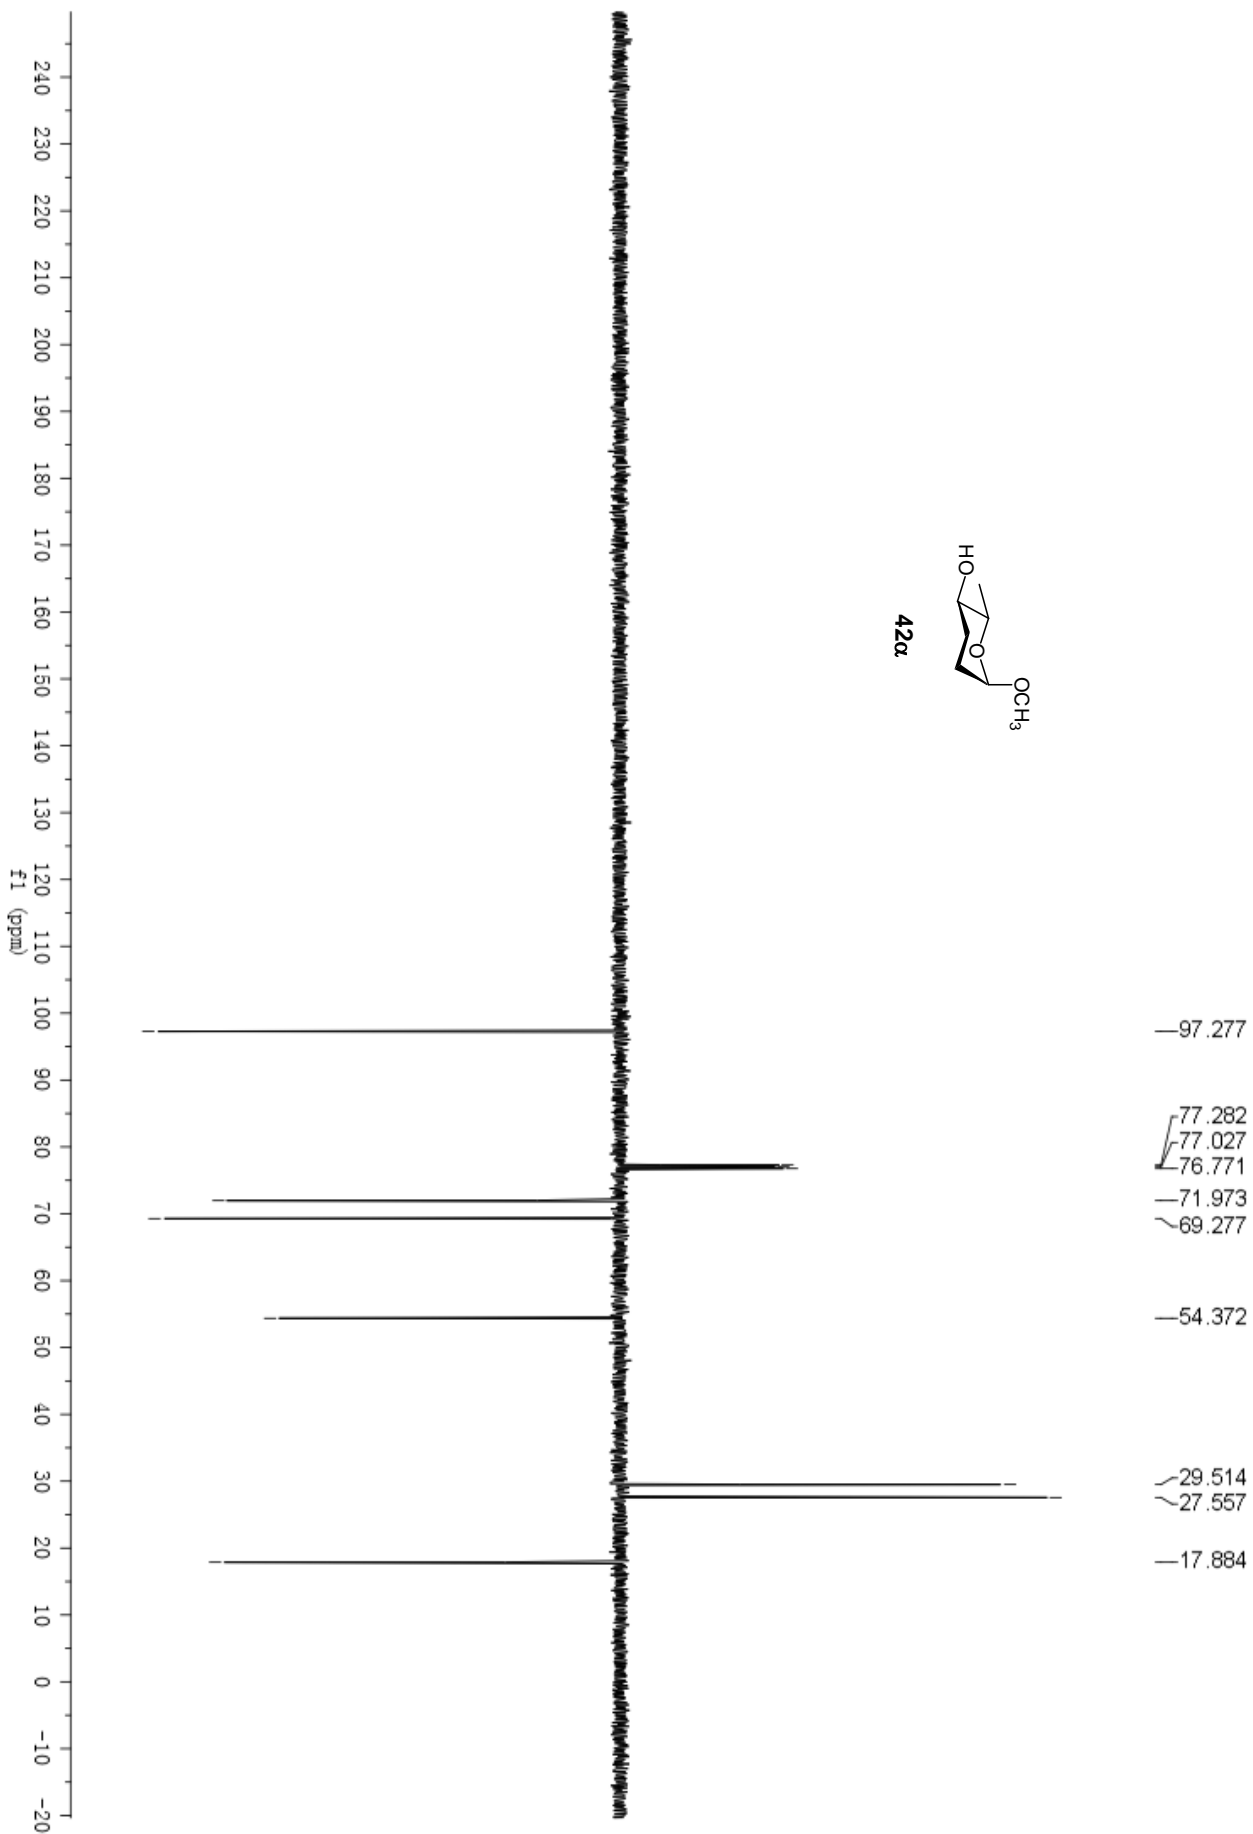

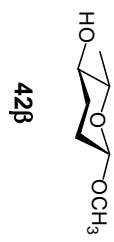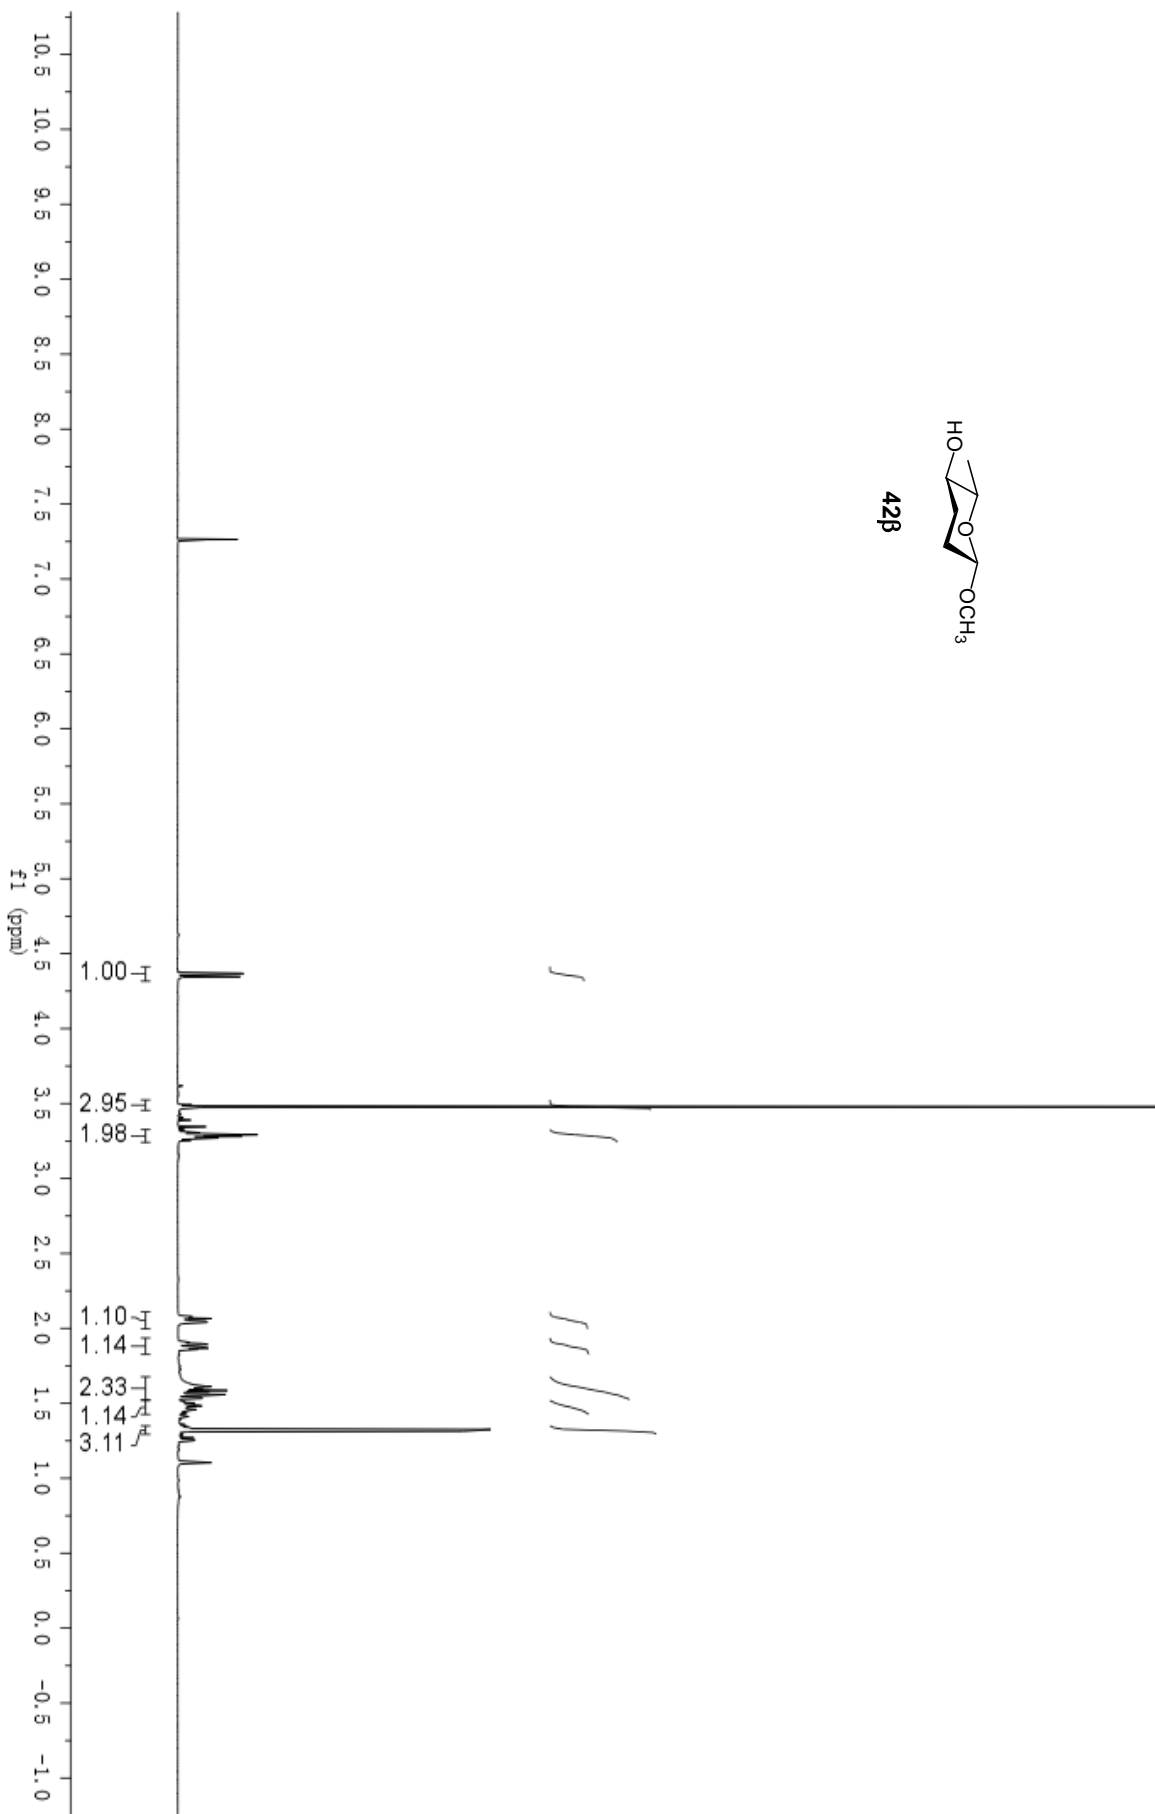

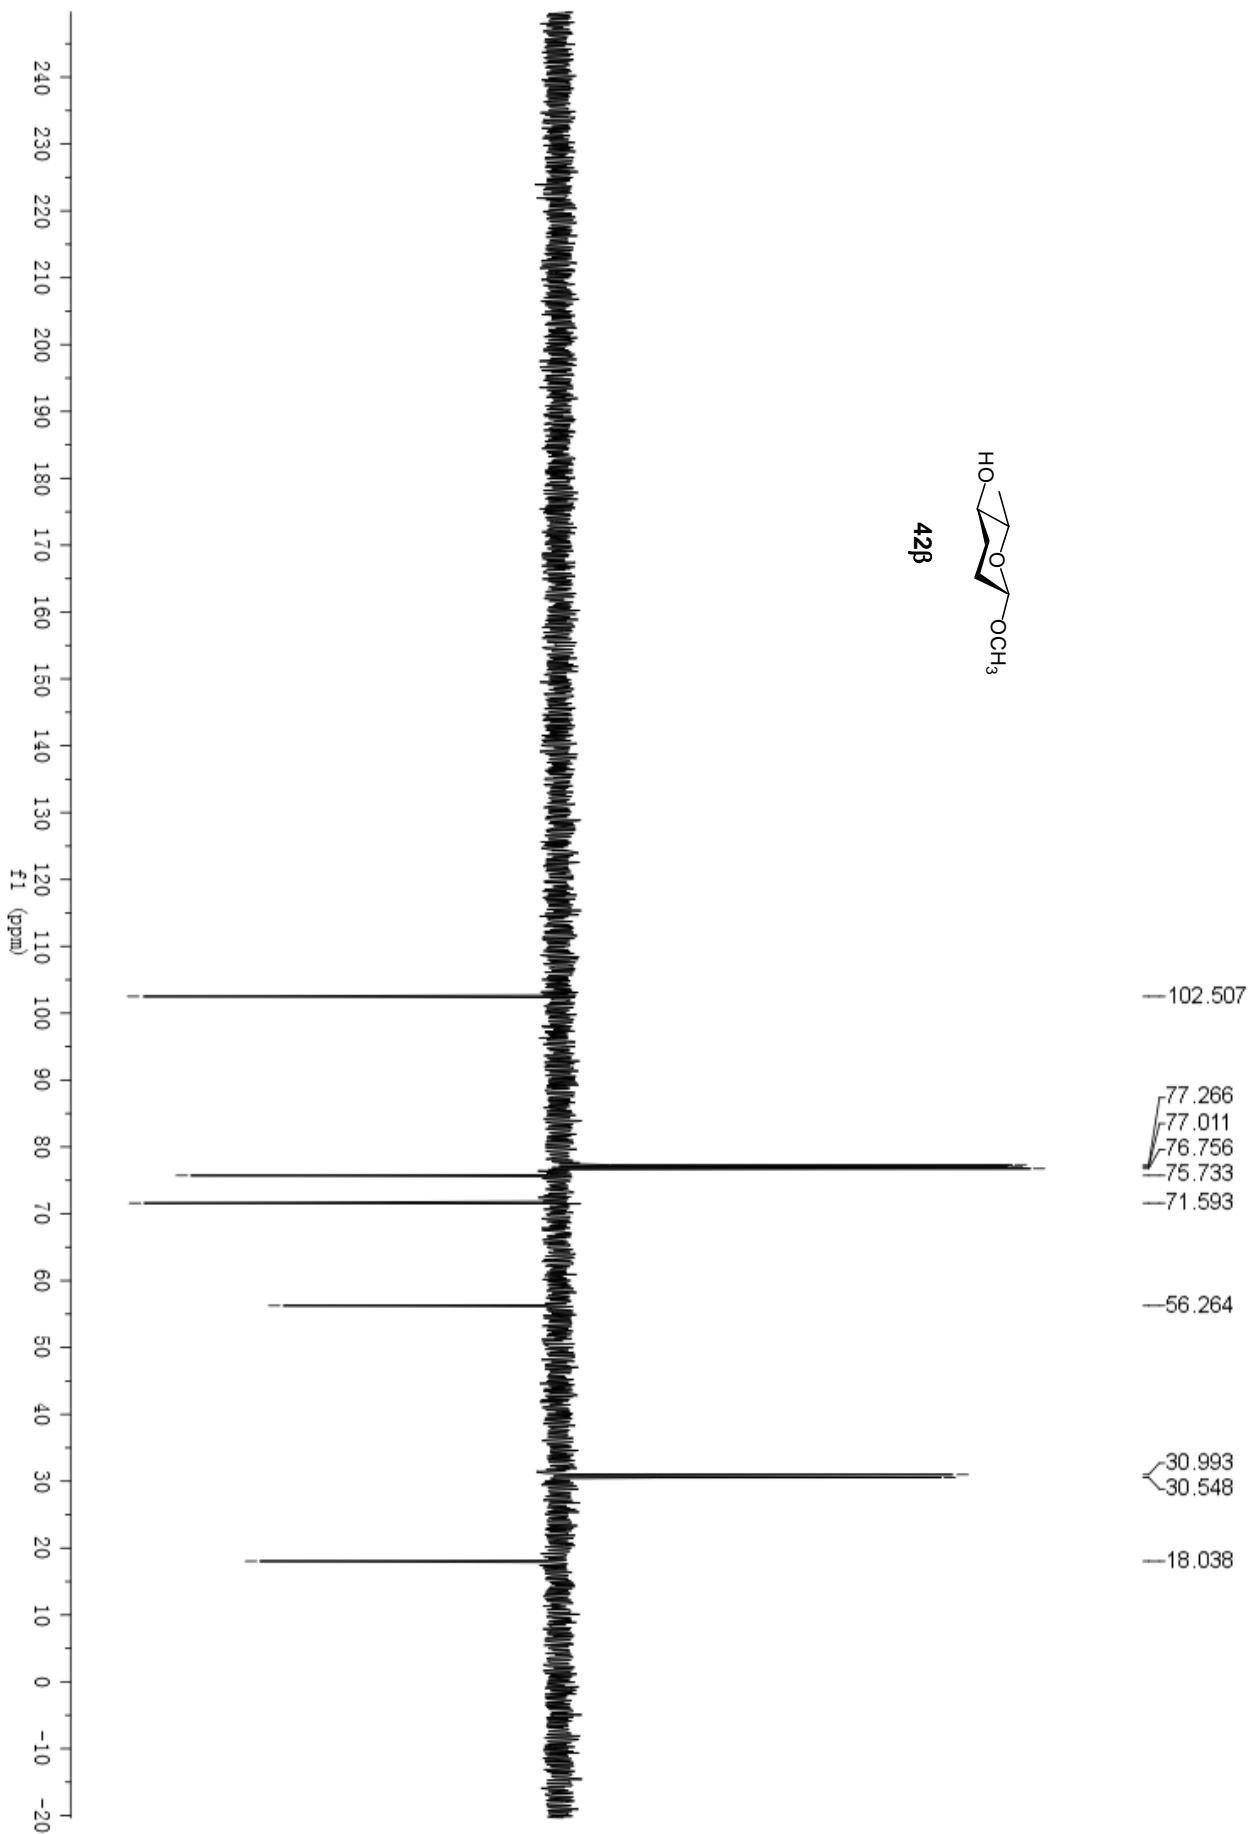

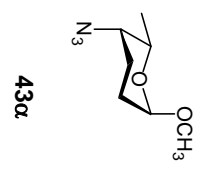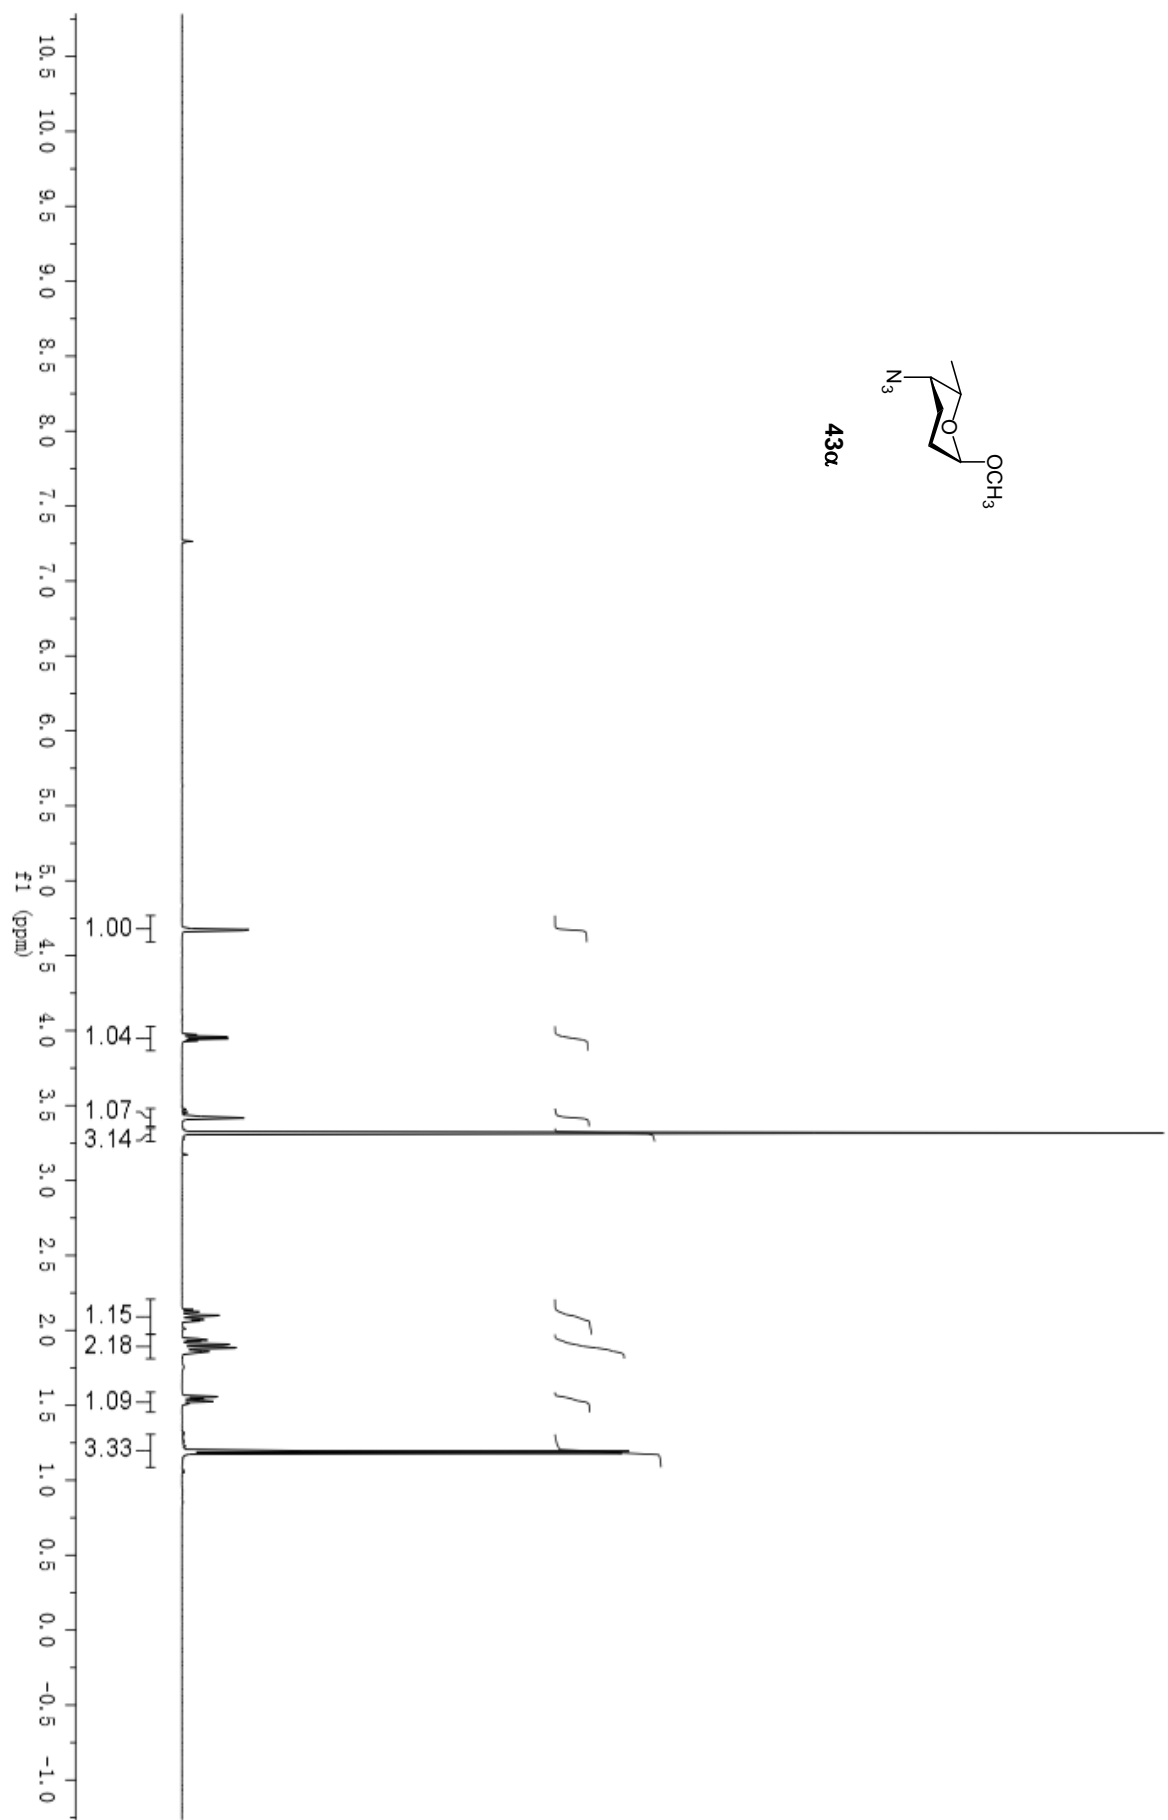



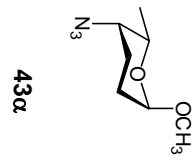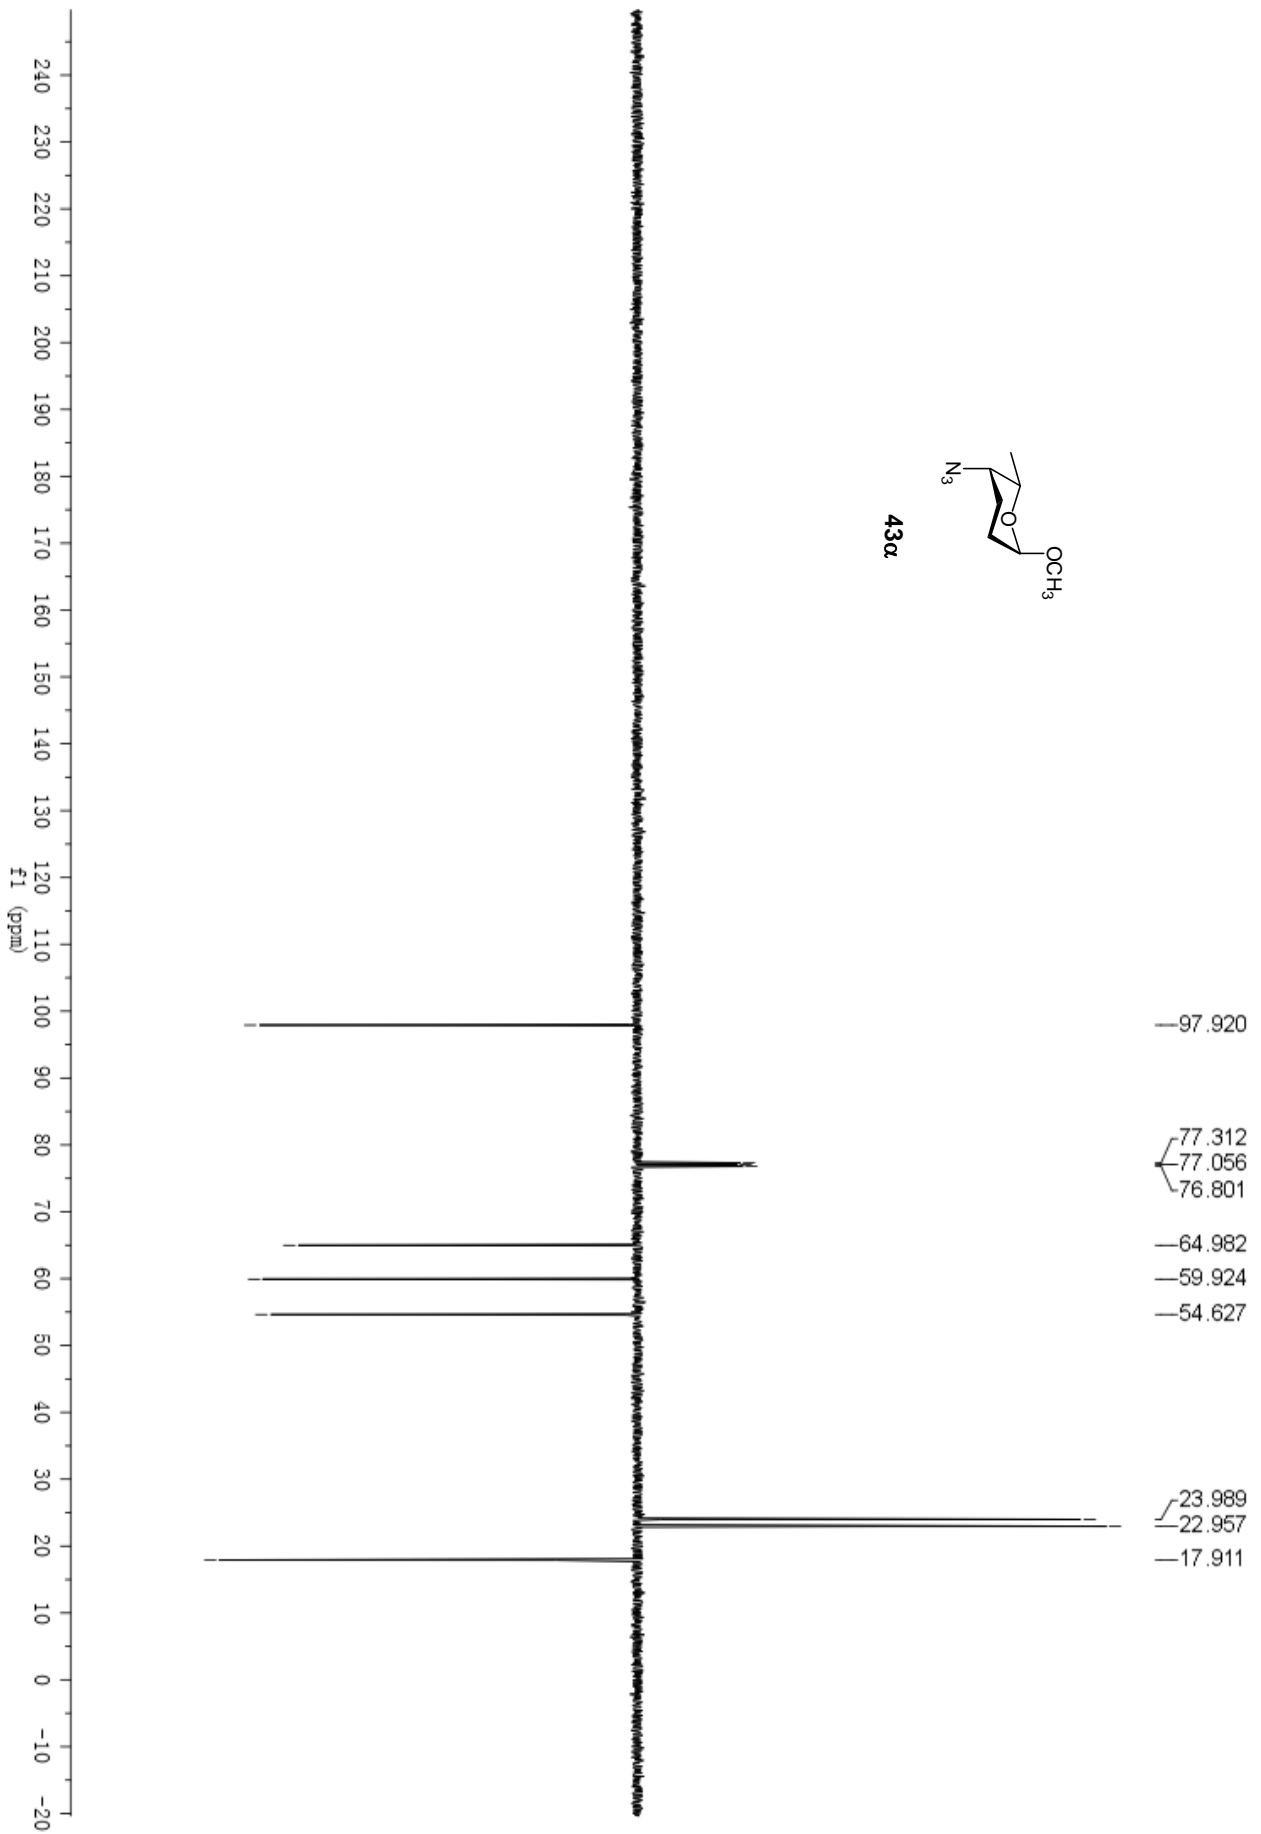

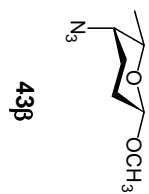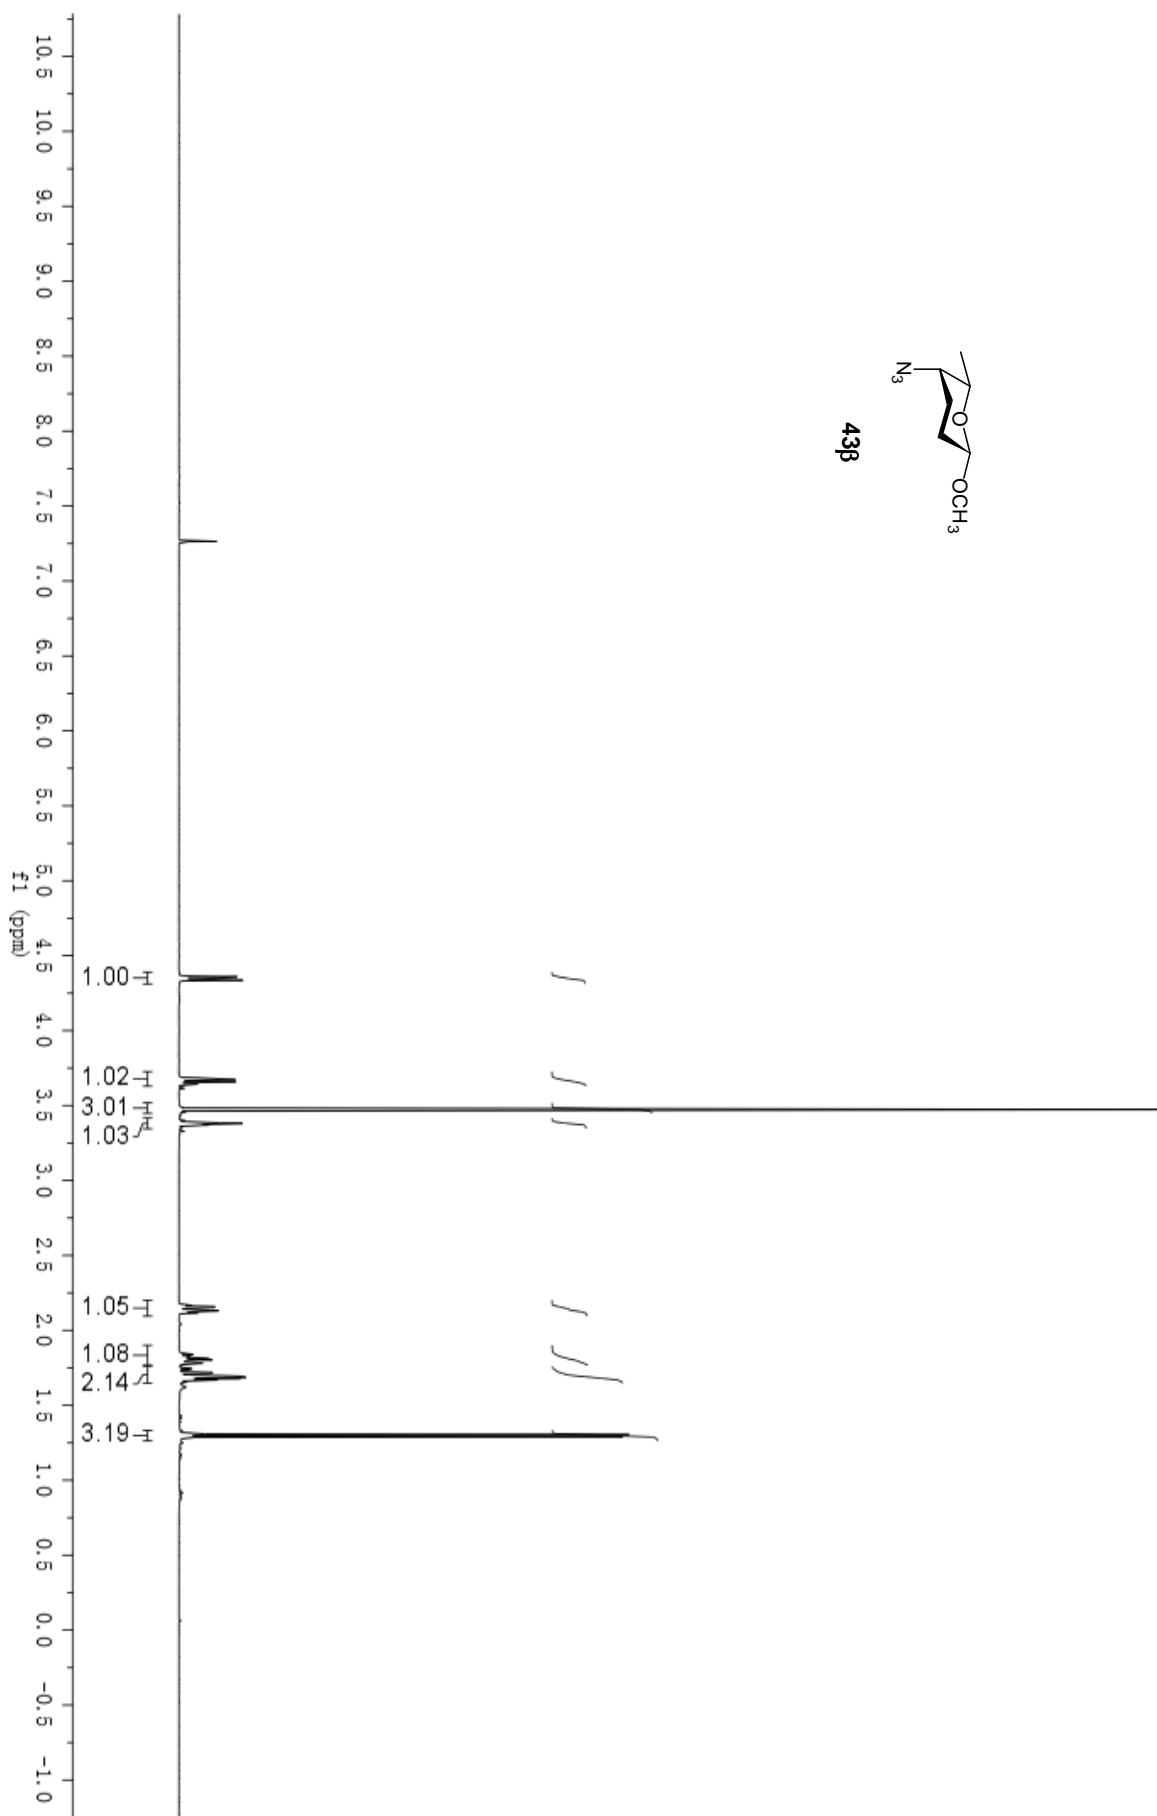

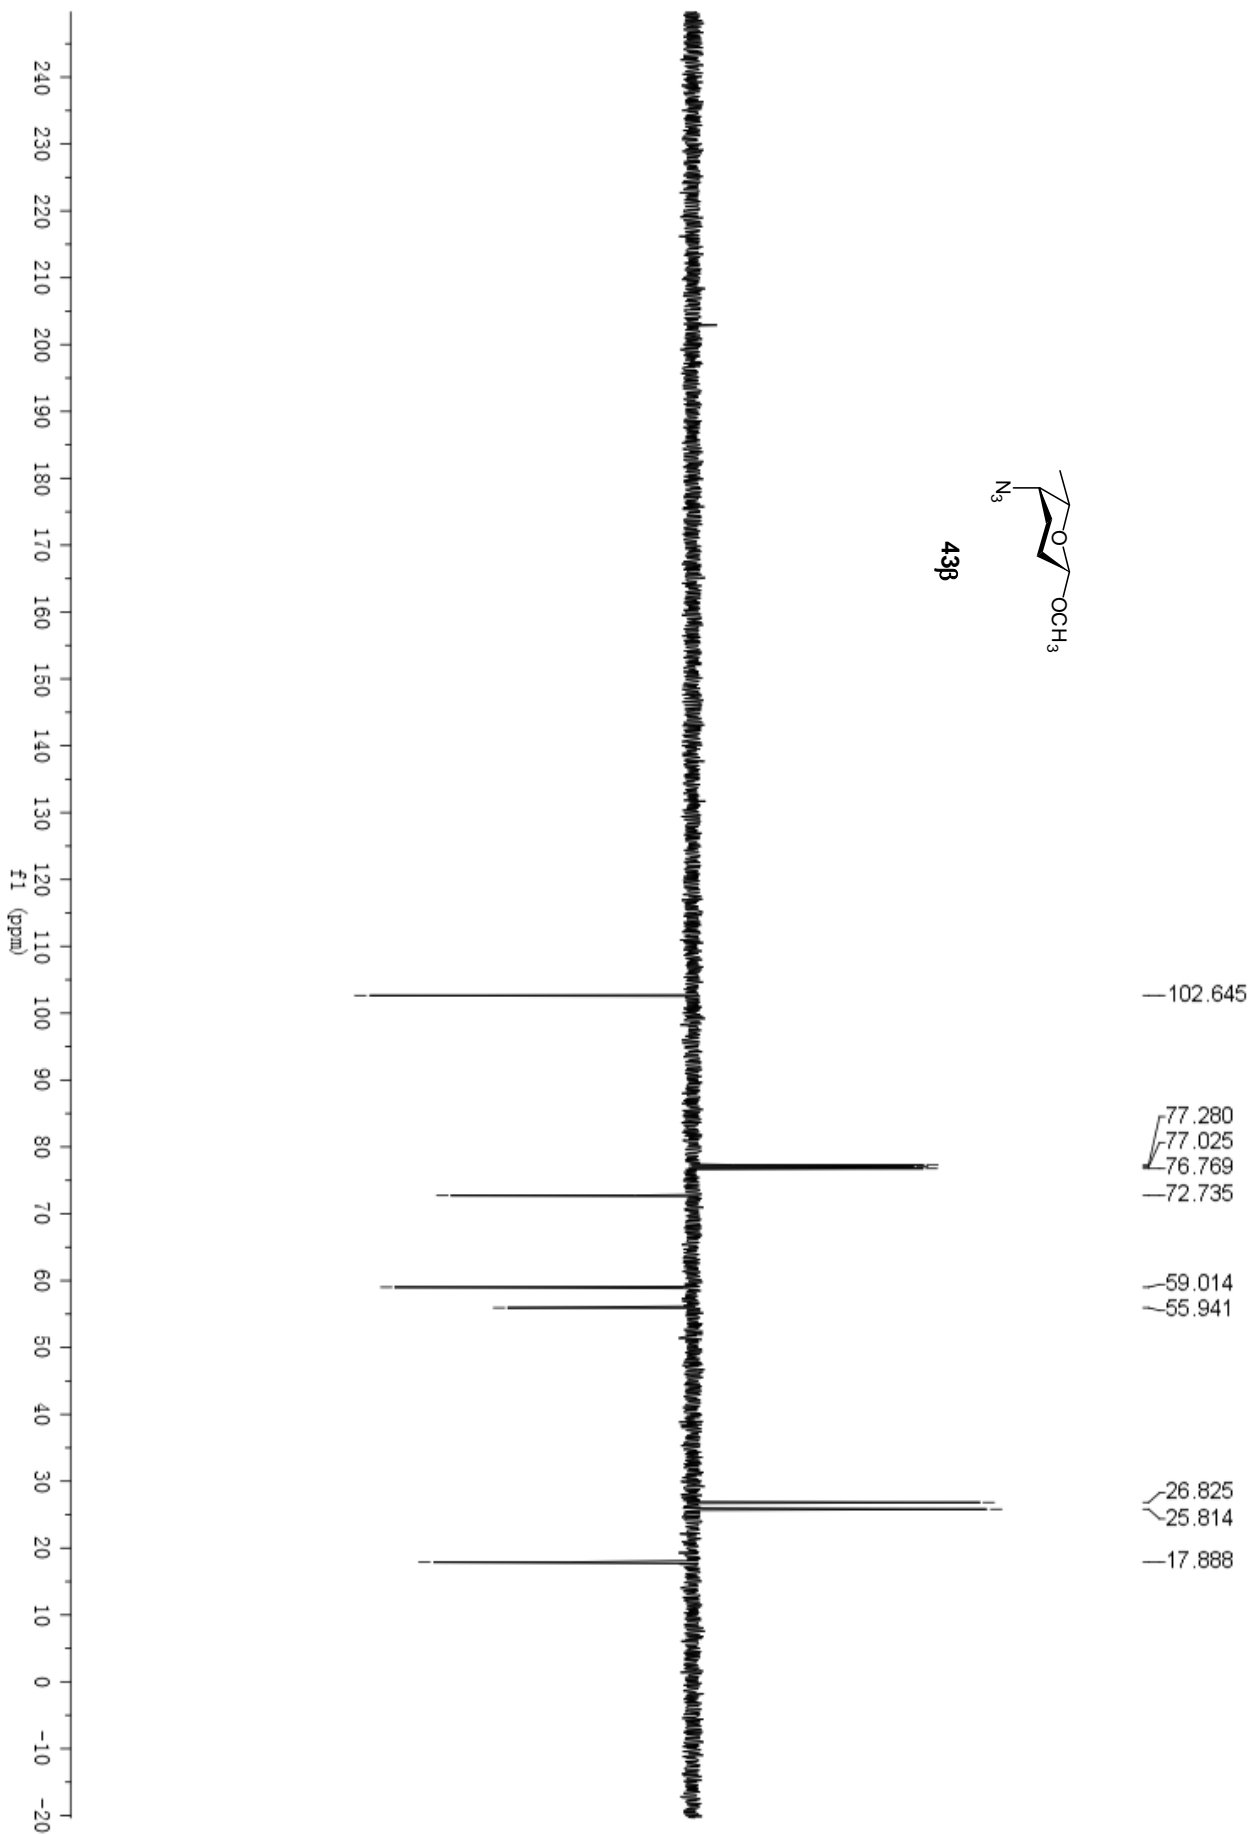

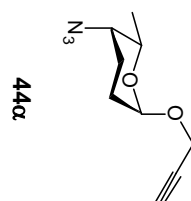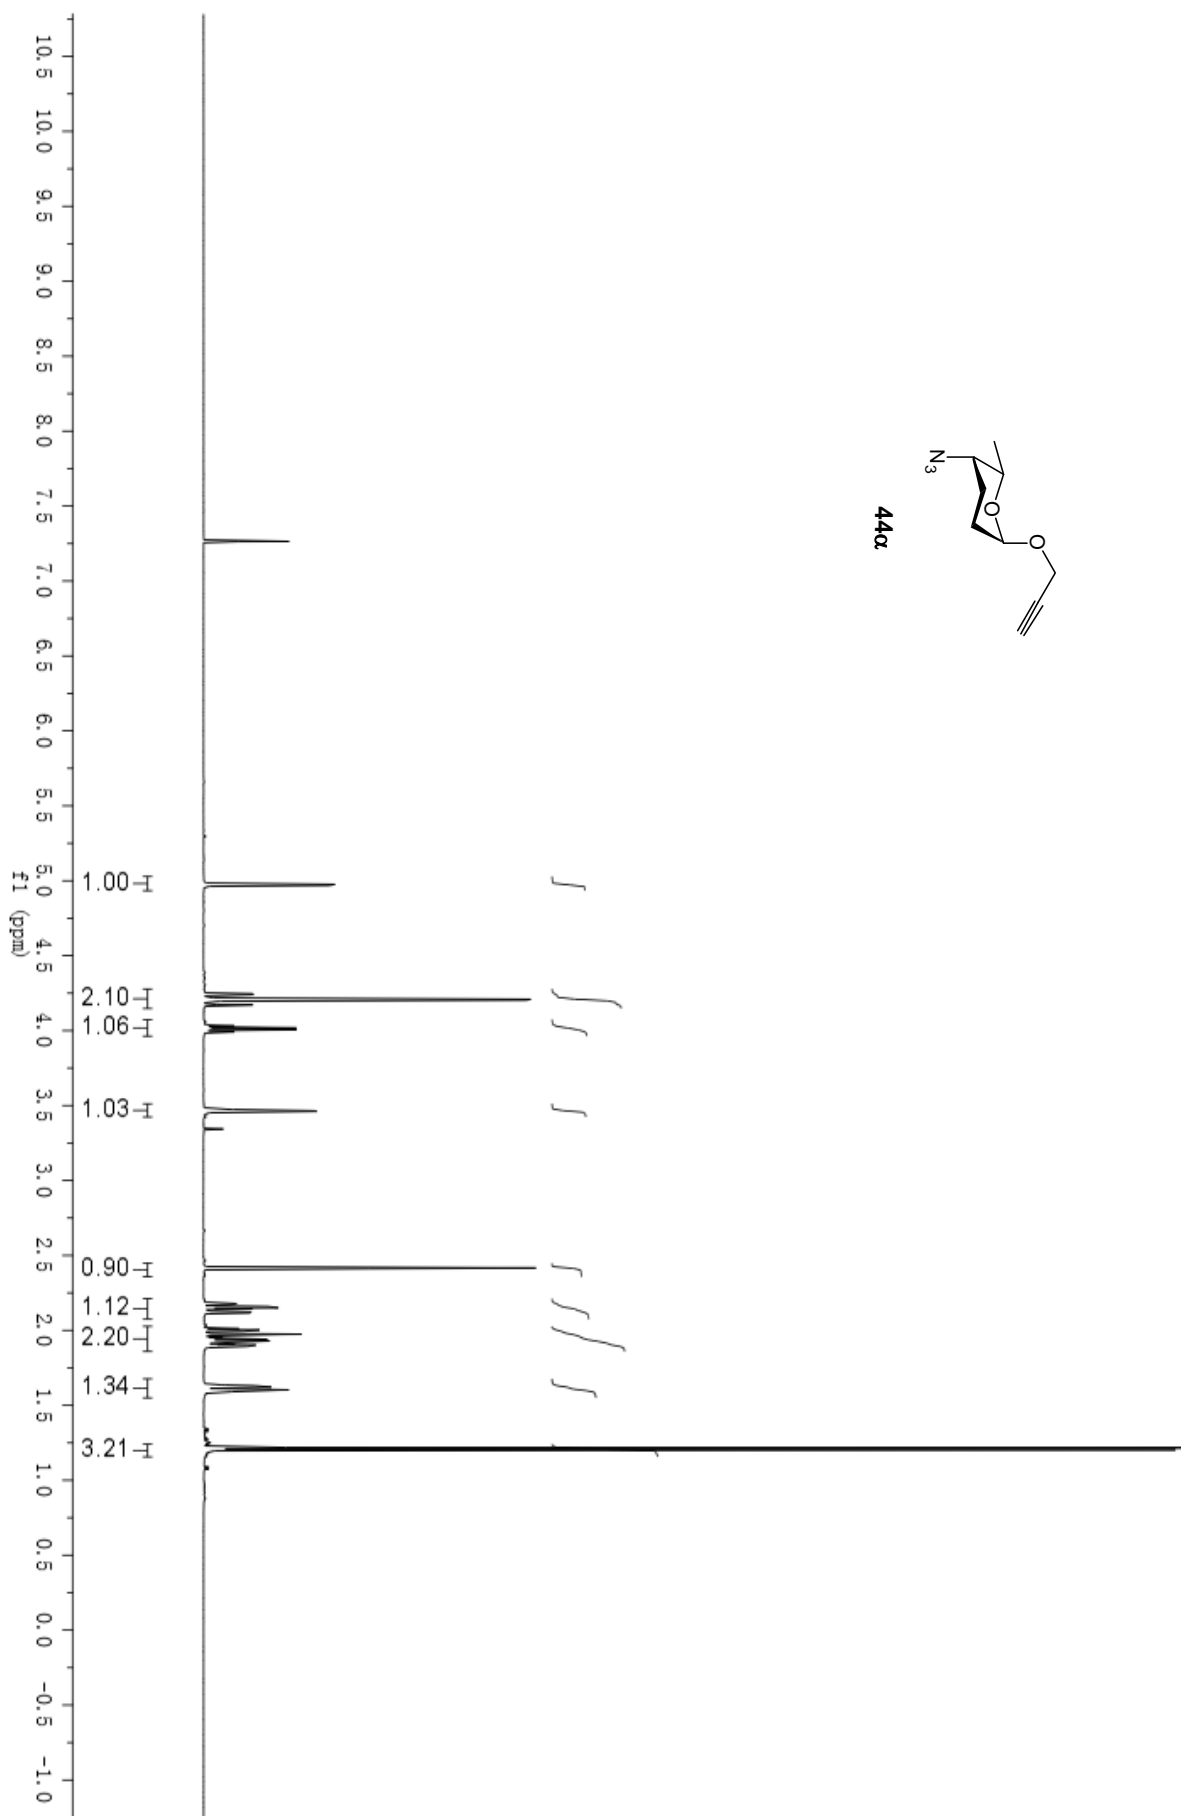

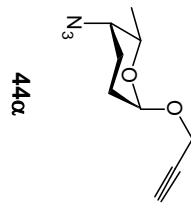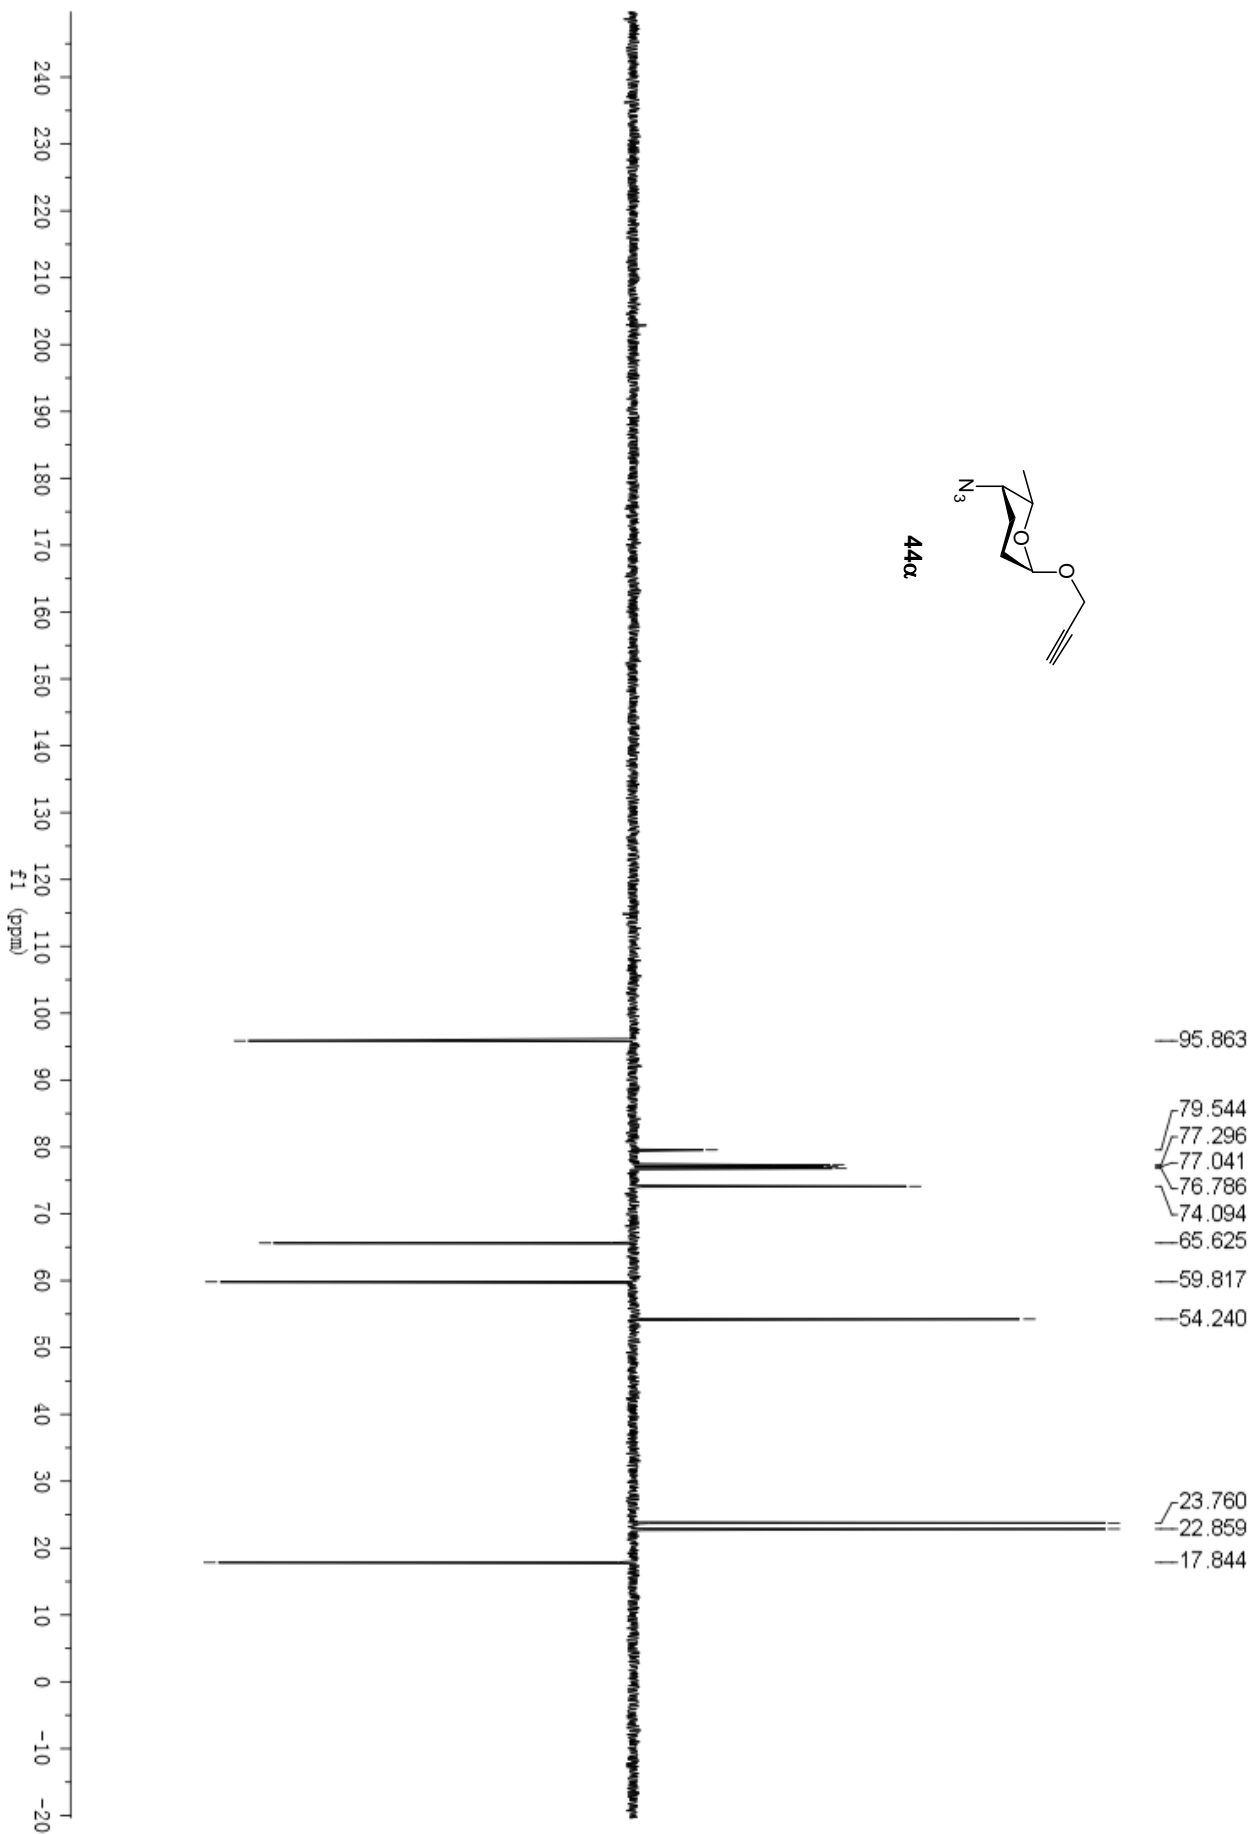

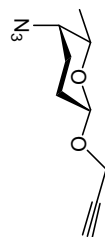

44β

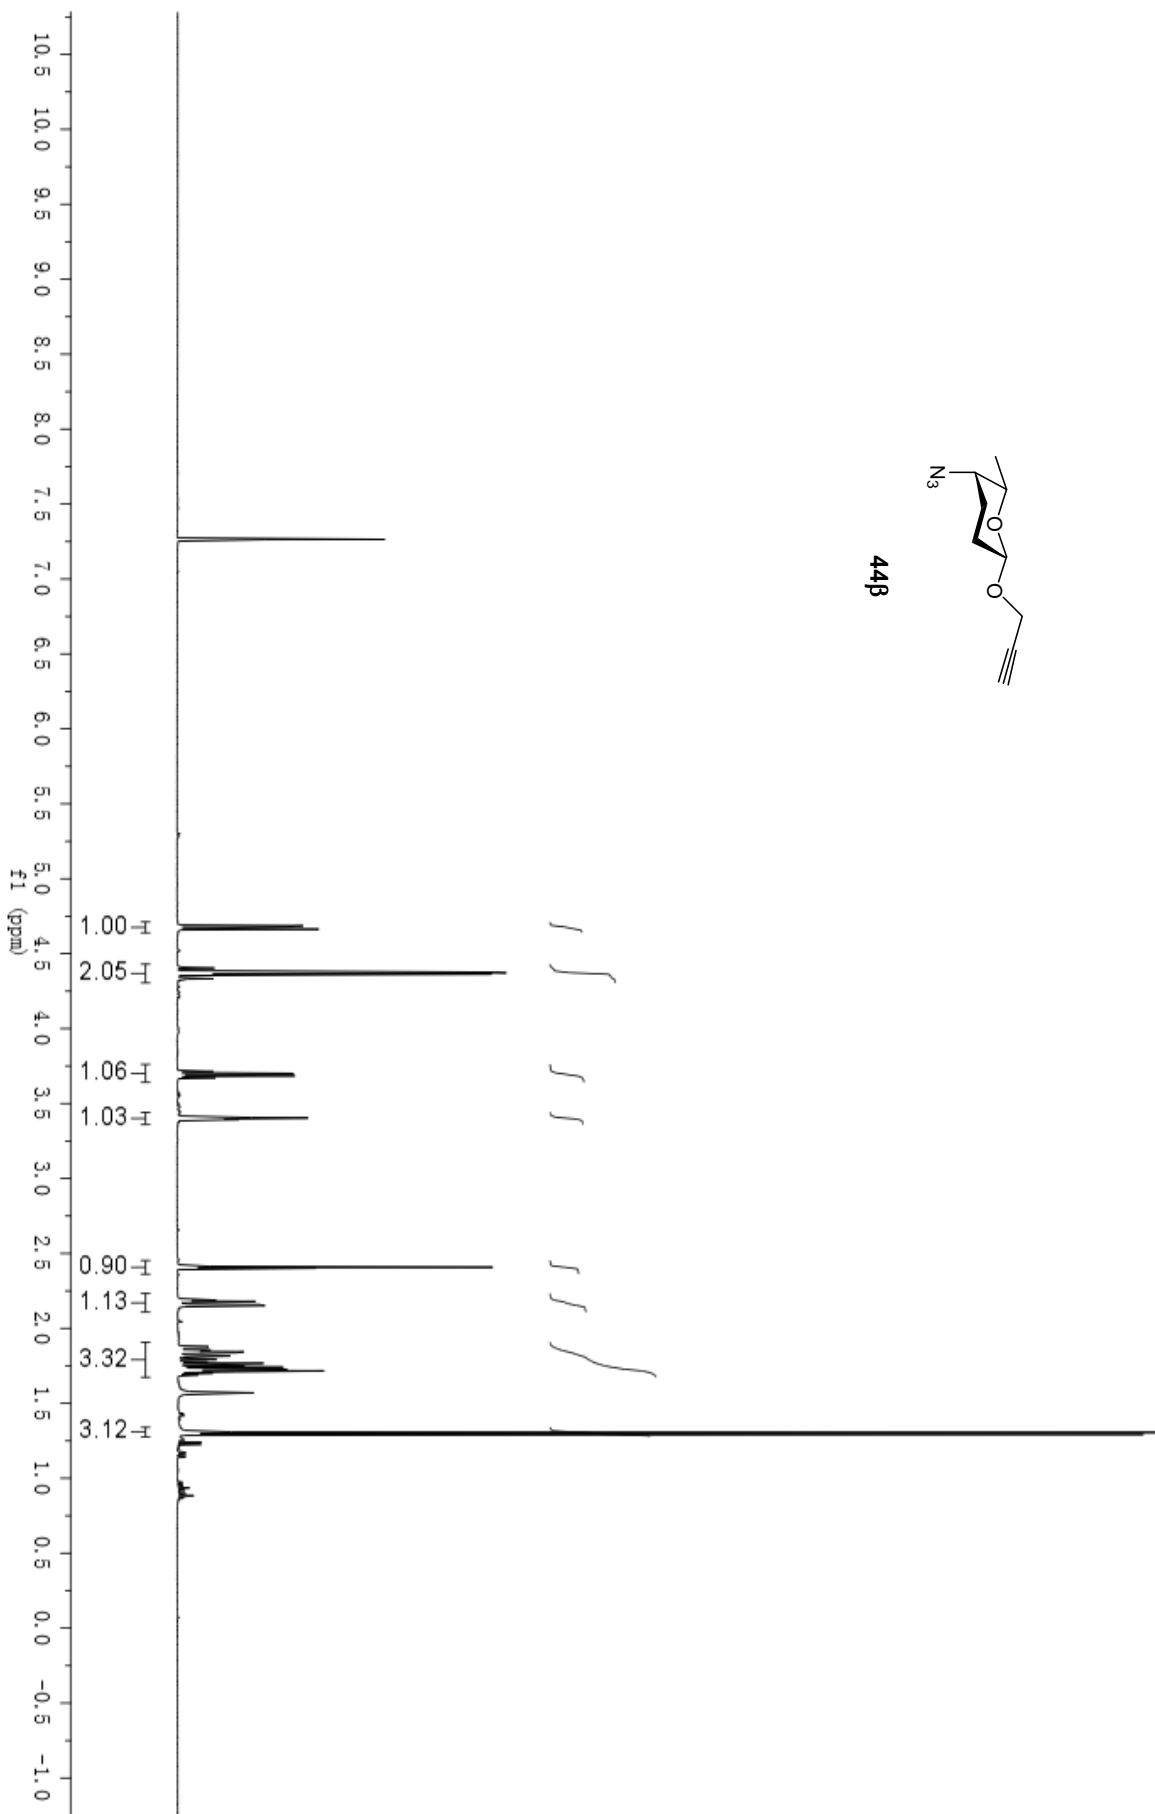

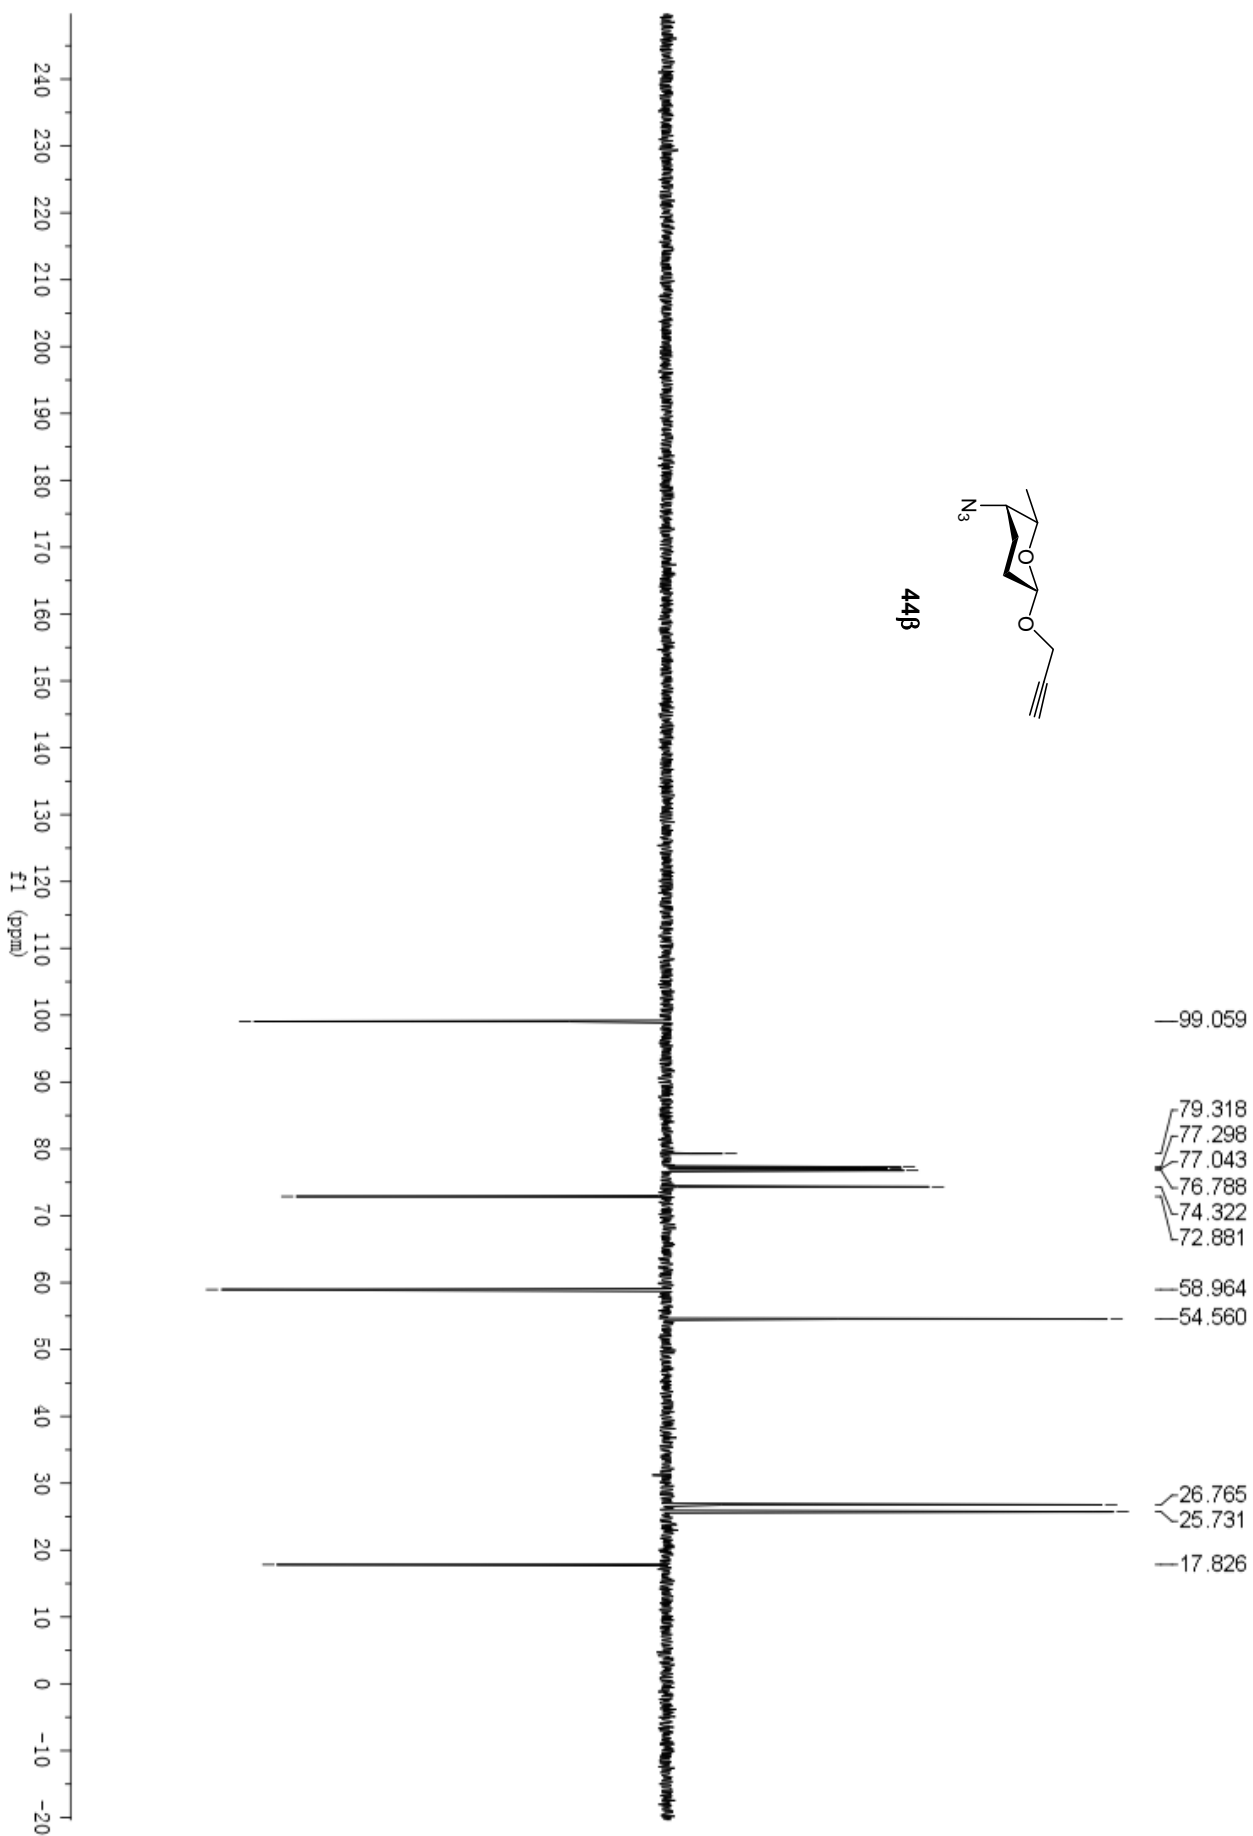

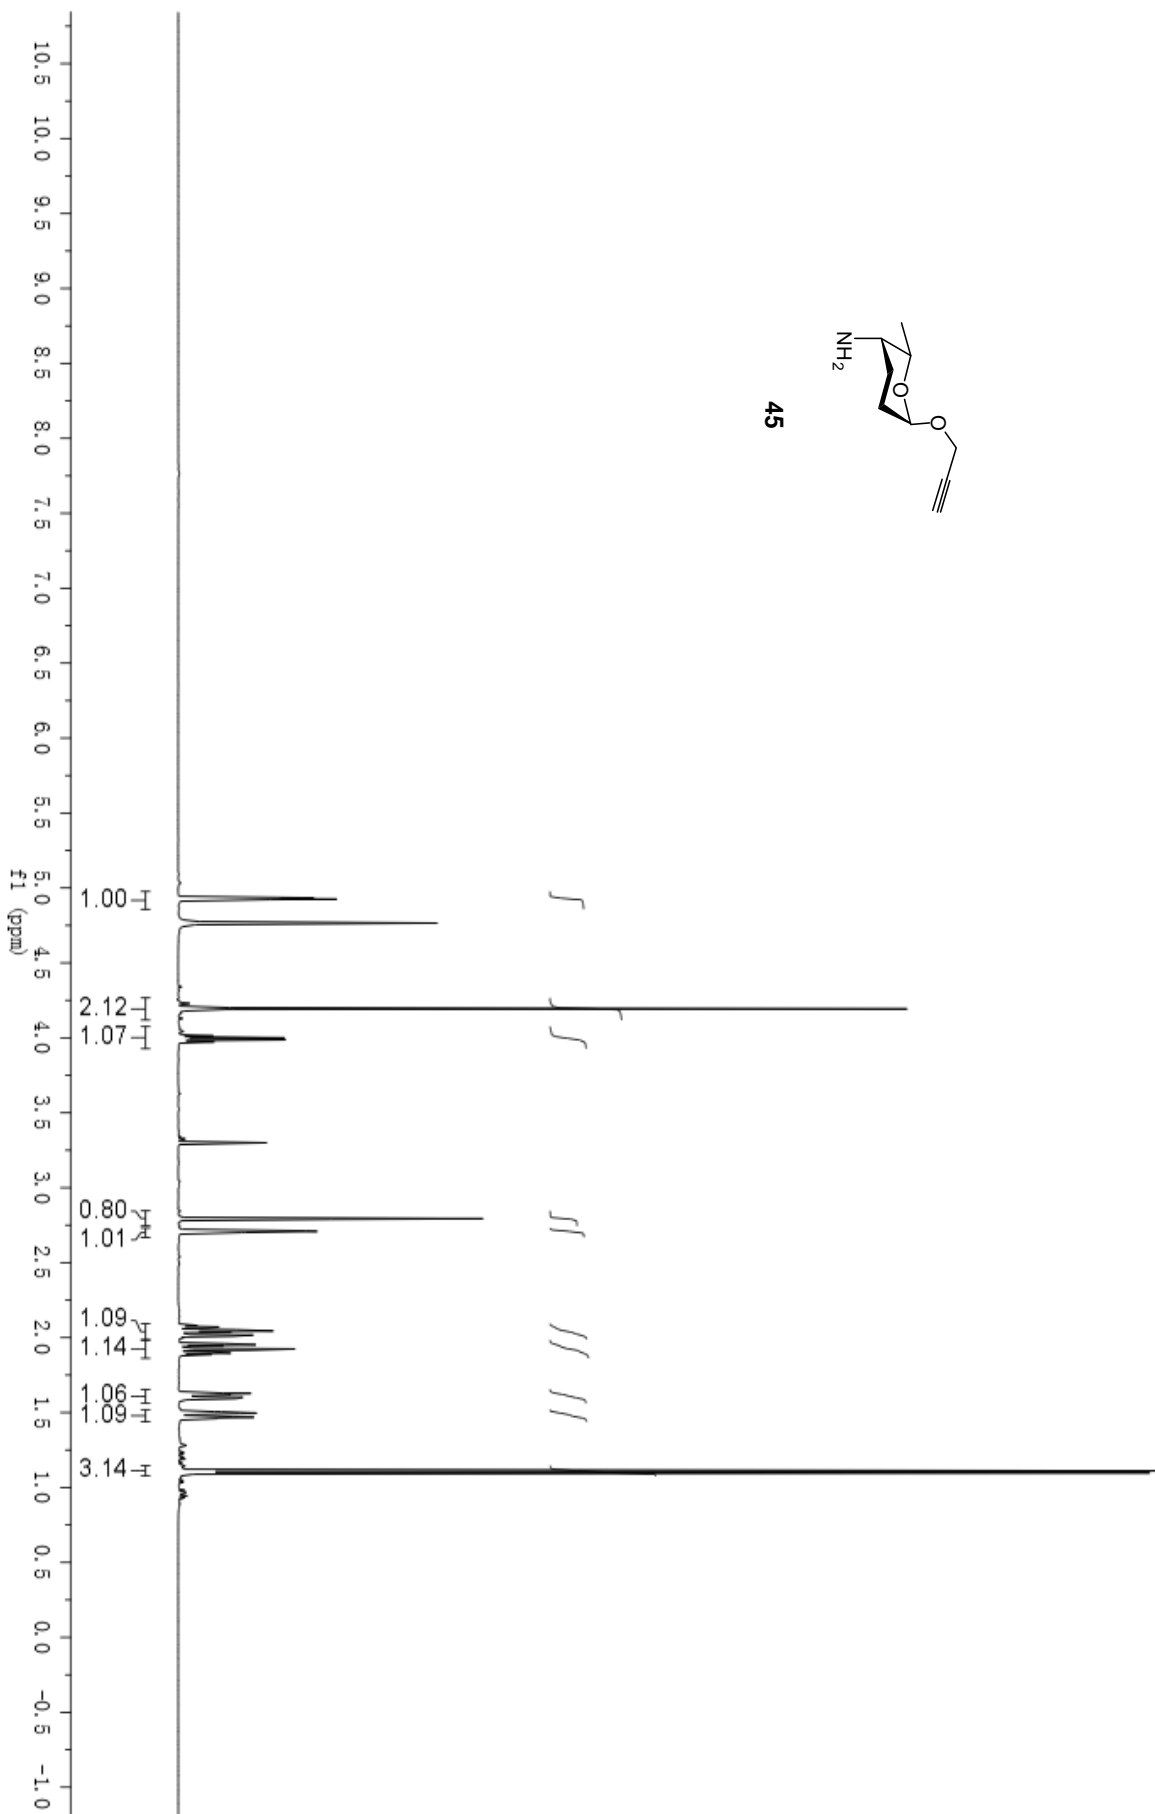



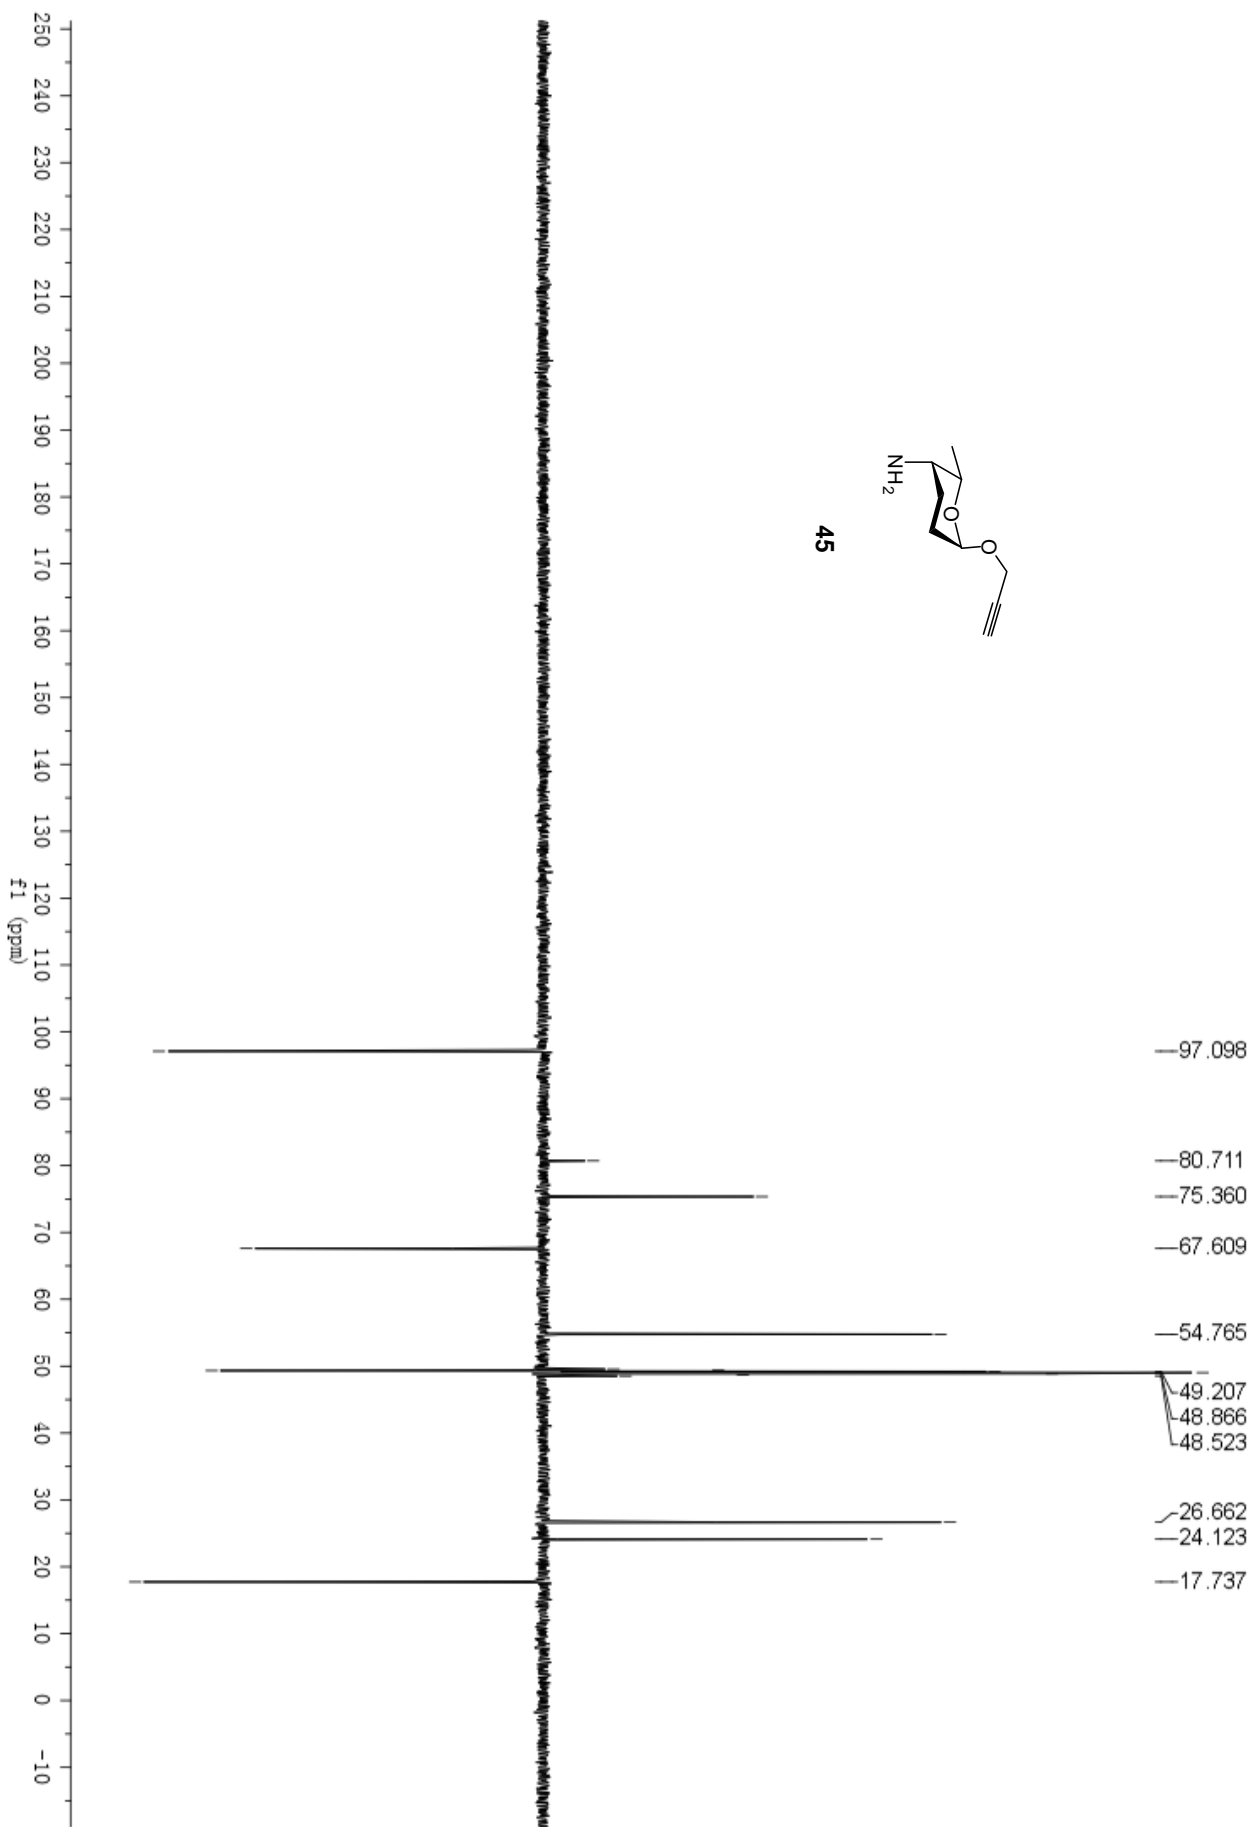

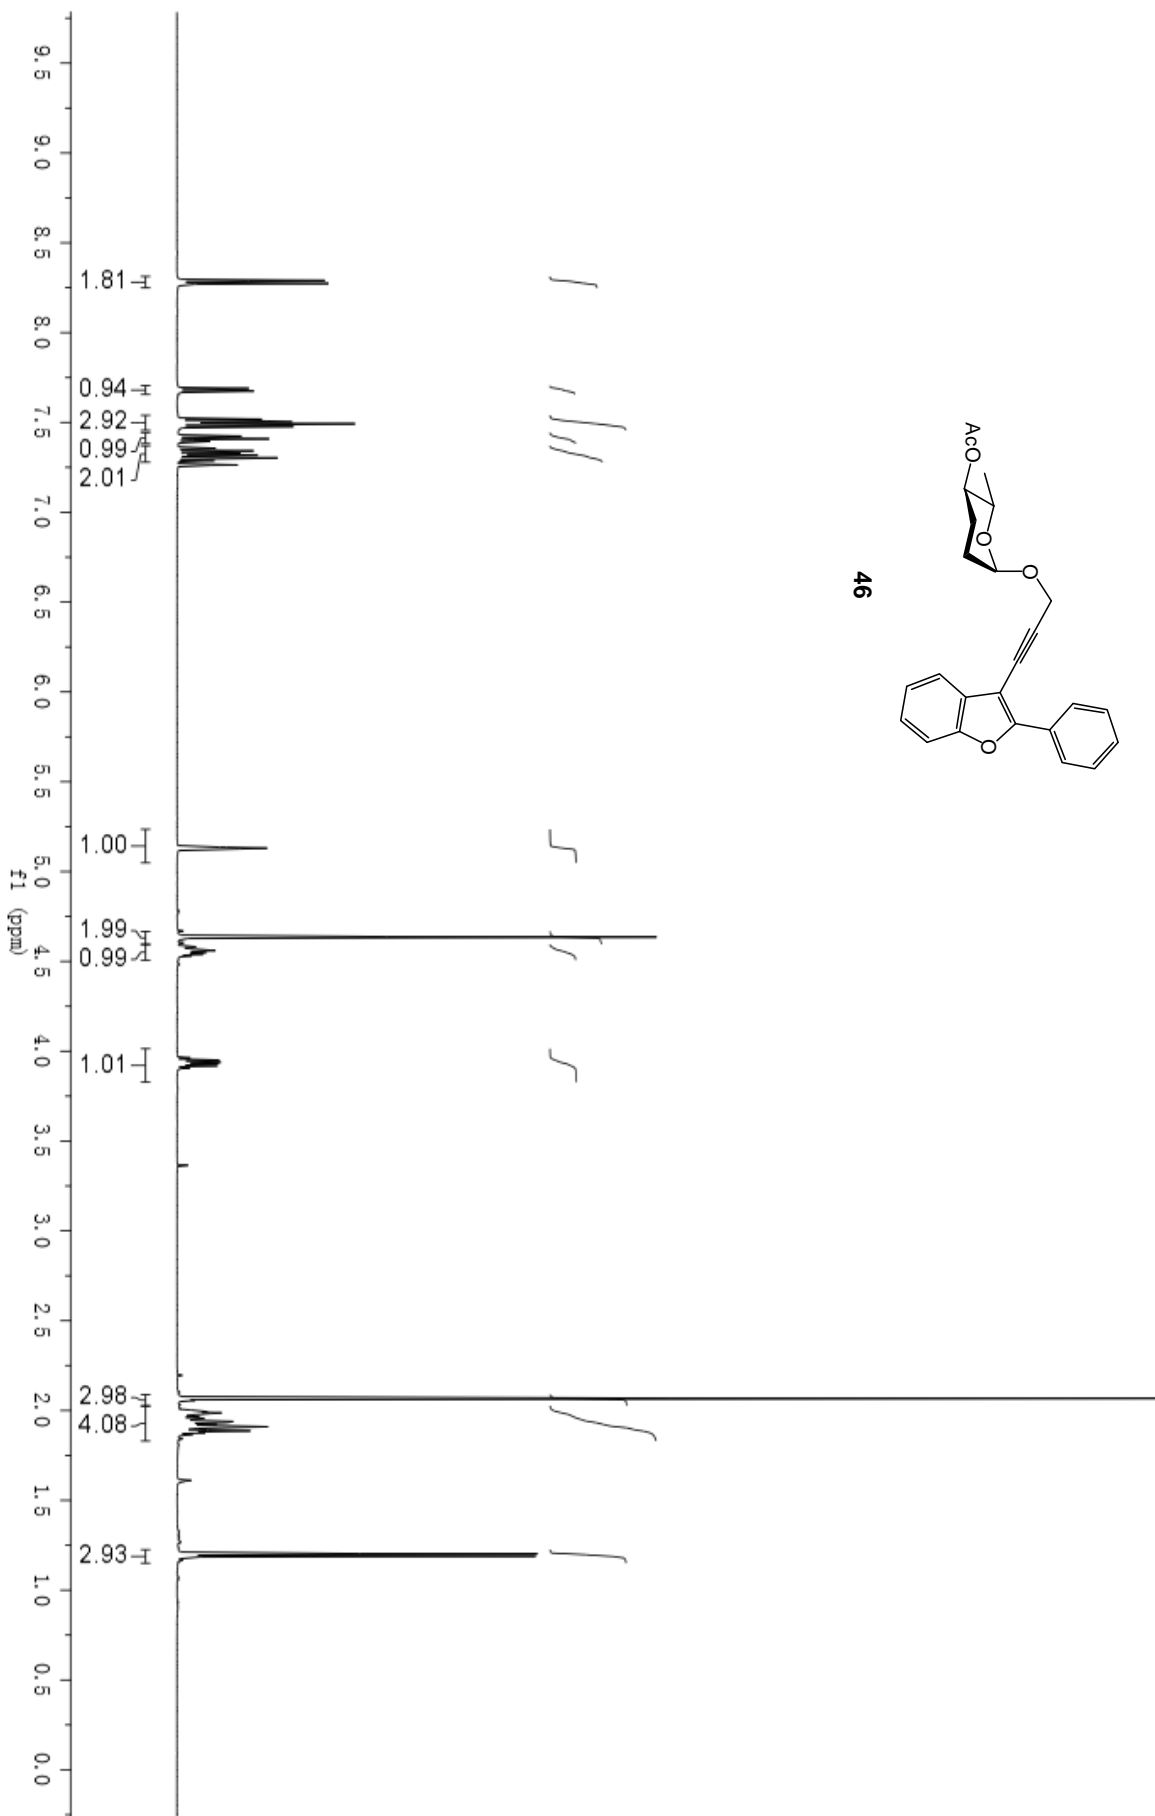

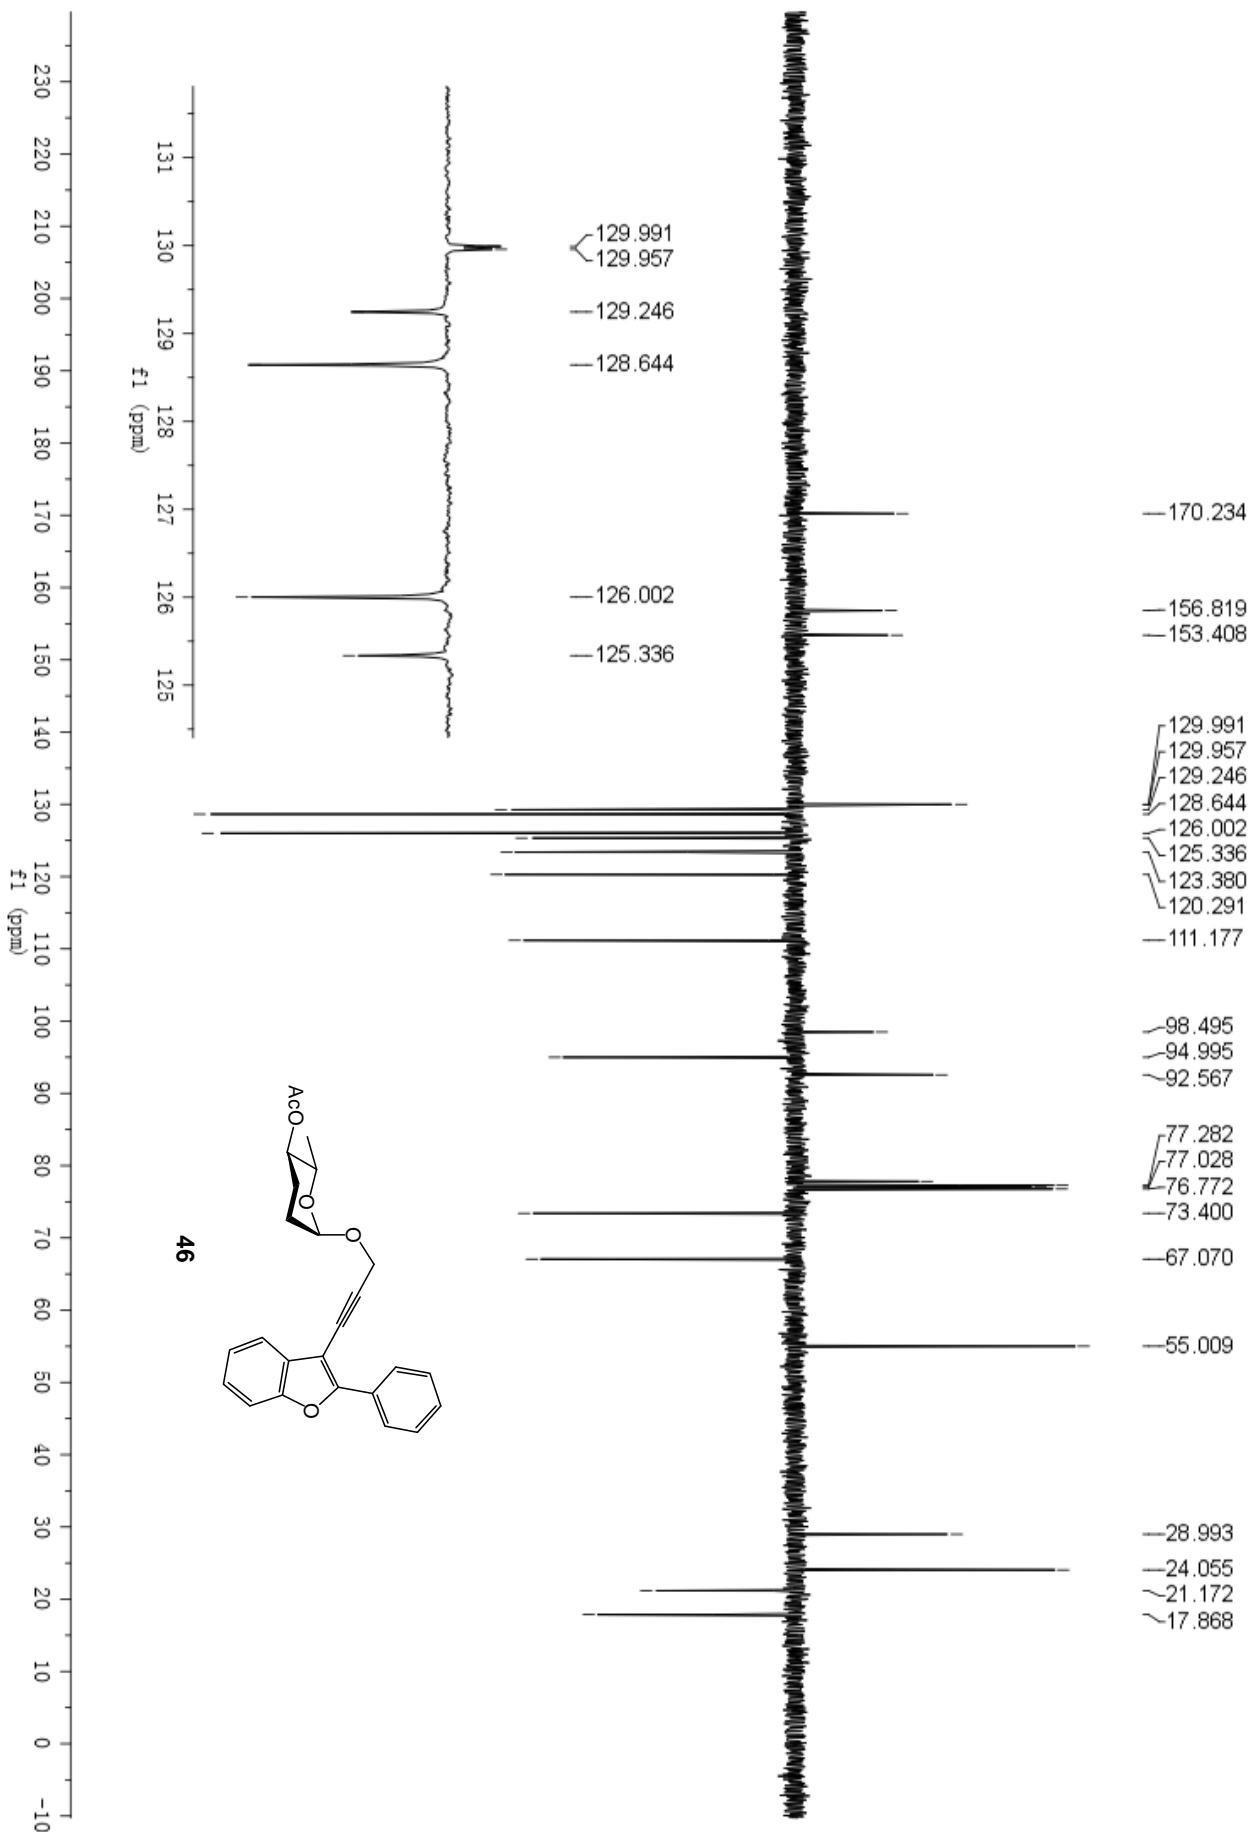

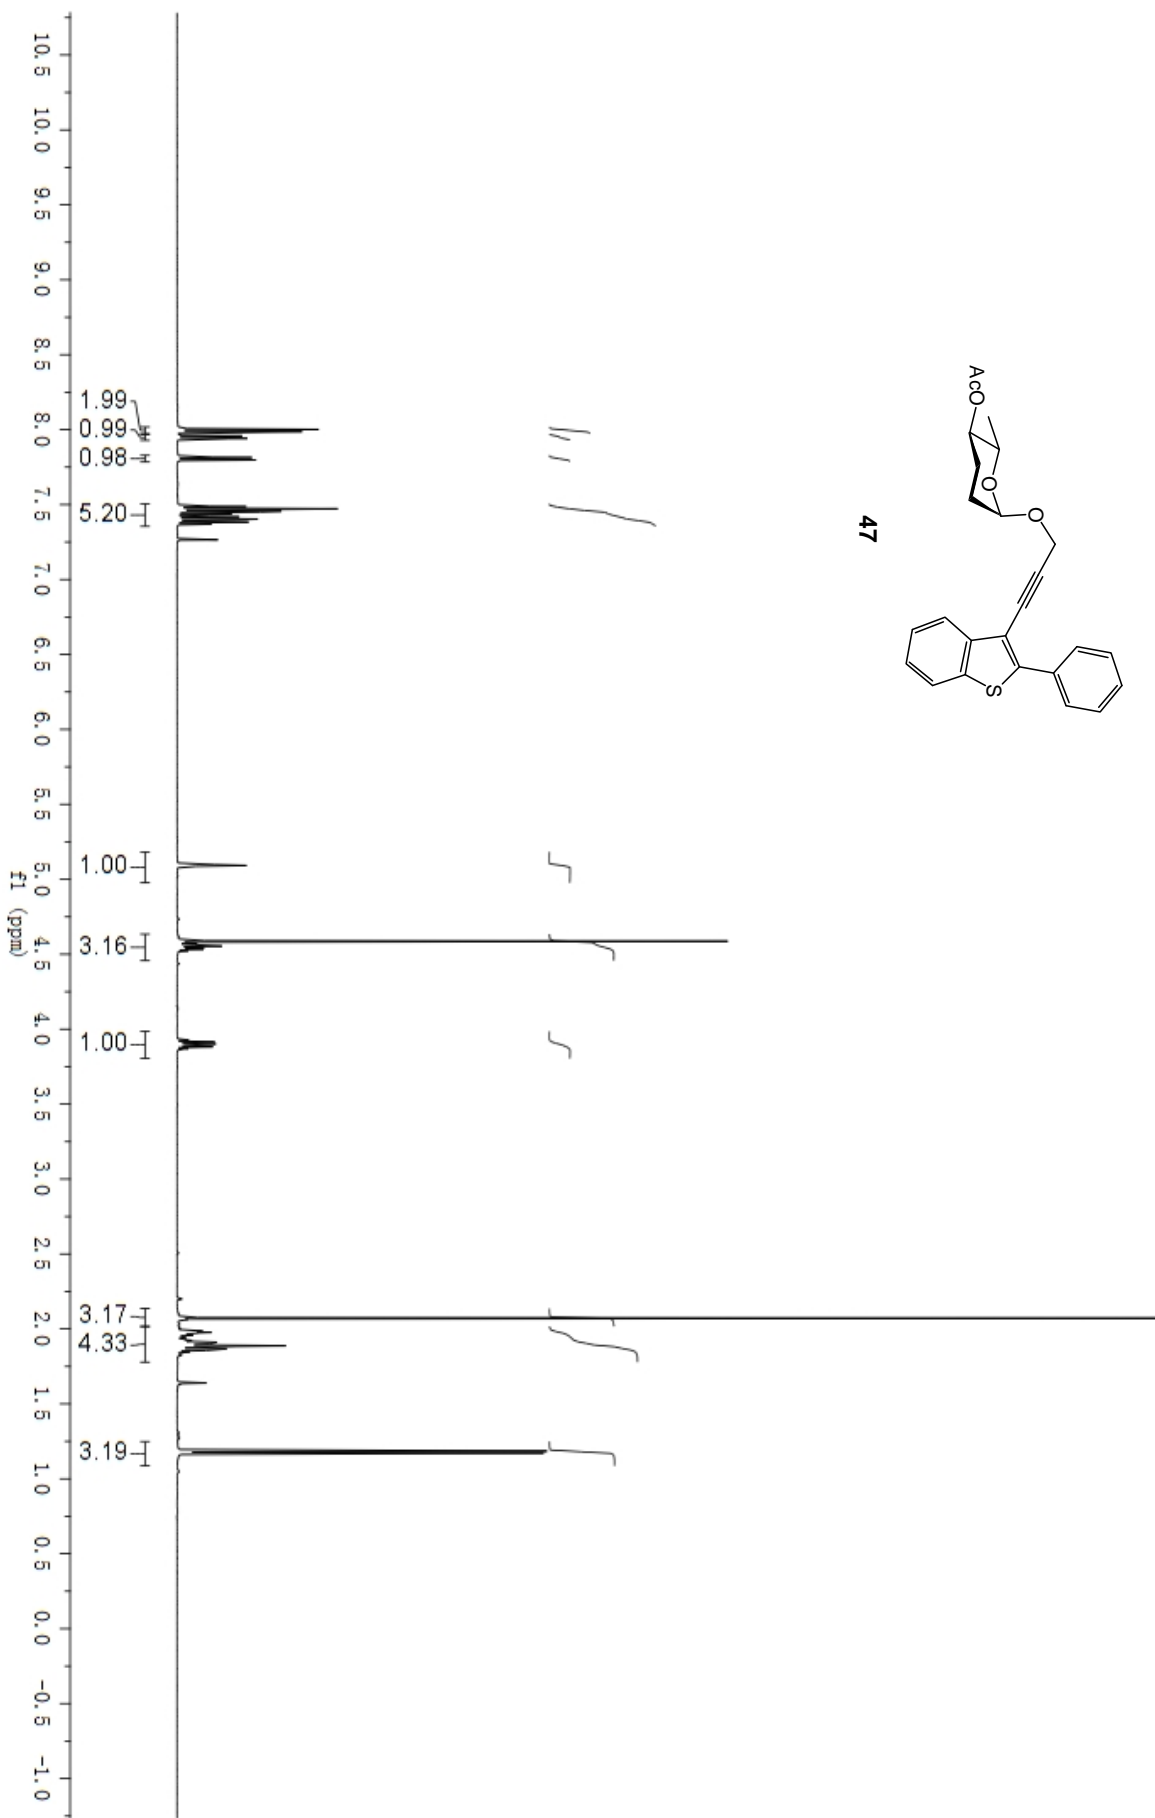

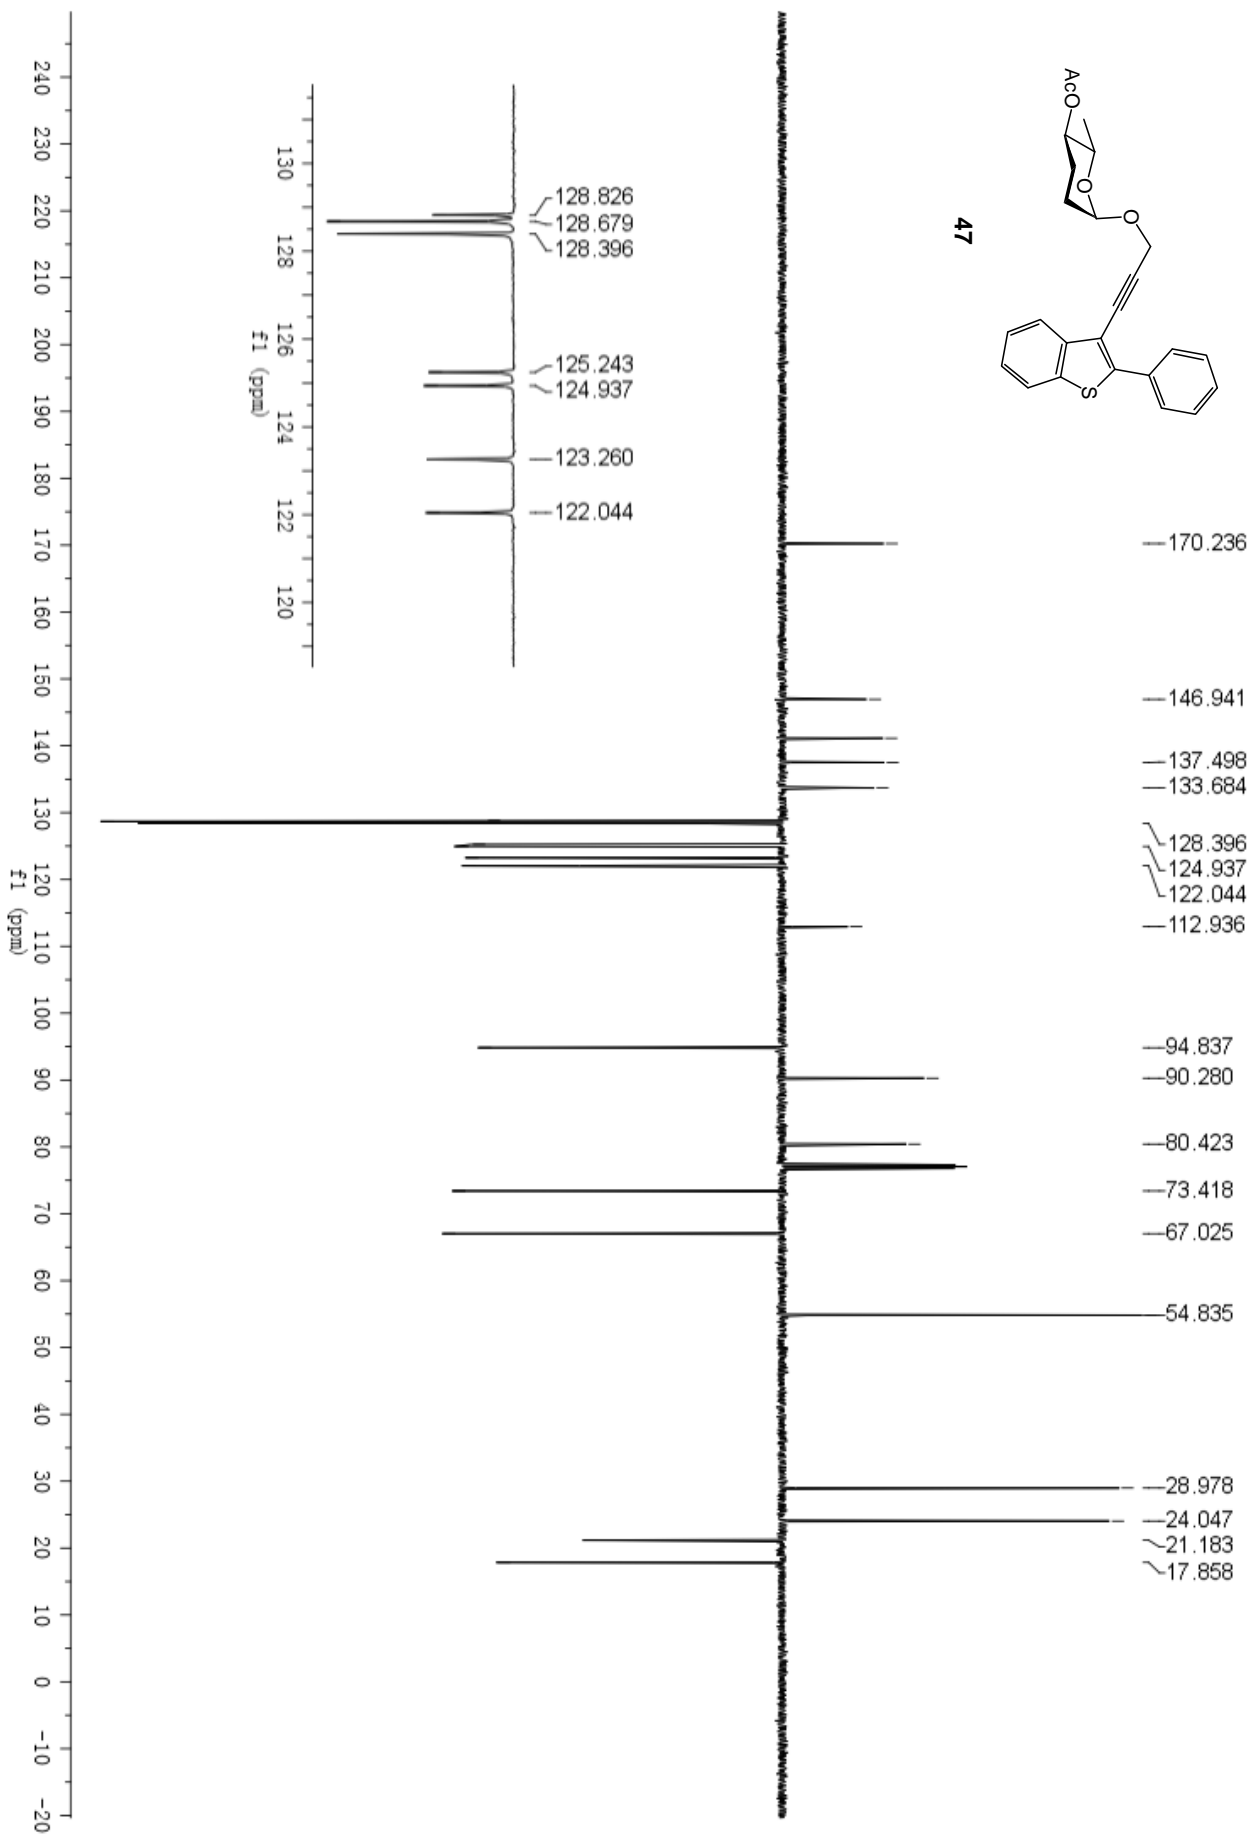

**HPLC Analysis of test compounds**

**HPLC:** VARIAN ProStar Model 701

**Column:** VARIAN Polaris 5 C8-A 250x4.6 mm

**Detector:** ELSD

Gradient of HPLC eluents

|                                                | 0 min | 2 min | 5 min | 20 min | 21 min | 25 min |
|------------------------------------------------|-------|-------|-------|--------|--------|--------|
| 25 mM NH <sub>4</sub> OAc Buffer, pH = 5.3 (%) | 60    | 60    | 40    | 40     | 60     | 60     |
| CH <sub>3</sub> CN (%)                         | 40    | 40    | 60    | 60     | 40     | 40     |

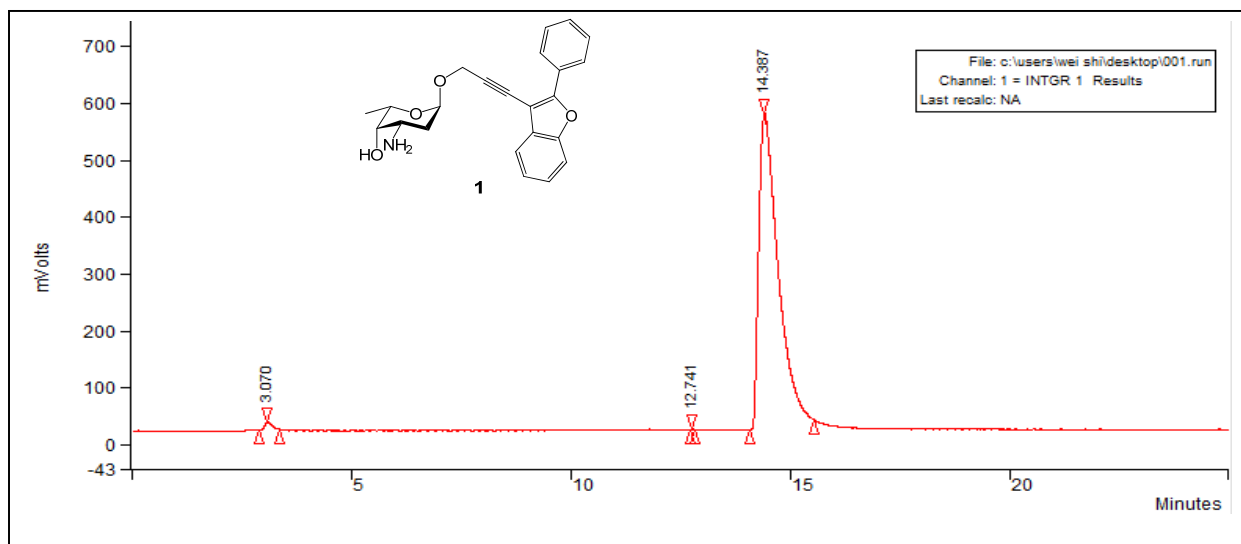

Print Date: Mon Dec 03 13:55:04 2007

Page 1 of 1

Title :  
 Run File : c:\users\wei shi\desktop\001.run  
 Method File : C:\star\Methods\Wei\Mannose.mth  
 Sample ID : Manual Sample

Injection Date: 2007/12/3 13:00      Calculation Date: 2007/12/3 13:25

Operator : Wei      Detector Type: ProStar/Dynamax (2 Volts)  
 Workstation:      Bus Address : 24  
 Instrument : Instrument #1      Sample Rate : 5.00 Hz  
 Channel : 1 = INTGR 1      Run Time : 24.987 min

\*\* LC Workstation Version 6.30 \*\* 02868-26D0-AE7-0234 \*\*

Run Mode : Analysis  
 Peak Measurement: Peak Area  
 Calculation Type: Percent

| Peak No. | Peak Name | Result (%) | Ret. Time (min) | Time Offset (min) | Area (counts) | Sep. Code | Width 1/2 (sec) | Status Codes |
|----------|-----------|------------|-----------------|-------------------|---------------|-----------|-----------------|--------------|
| 1        |           | 0.9944     | 3.070           | 0.000             | 168790        | BB        | 12.5            |              |
| 2        |           | 0.0383     | 12.741          | 0.000             | 6497          | BB        | 2.8             |              |
| 3        |           | 98.9673    | 14.387          | 0.000             | 16798884      | BB        | 27.7            |              |
| Totals:  |           | 100.0000   |                 | 0.000             | 16974171      |           |                 |              |

### Gradient of HPLC eluents

|                                                | 0 min | 2 min | 5 min | 20 min | 21 min | 25 min |
|------------------------------------------------|-------|-------|-------|--------|--------|--------|
| 25 mM NH <sub>4</sub> OAc Buffer, pH = 5.3 (%) | 60    | 60    | 40    | 40     | 60     | 60     |
| CH <sub>3</sub> CN (%)                         | 40    | 40    | 60    | 60     | 40     | 40     |

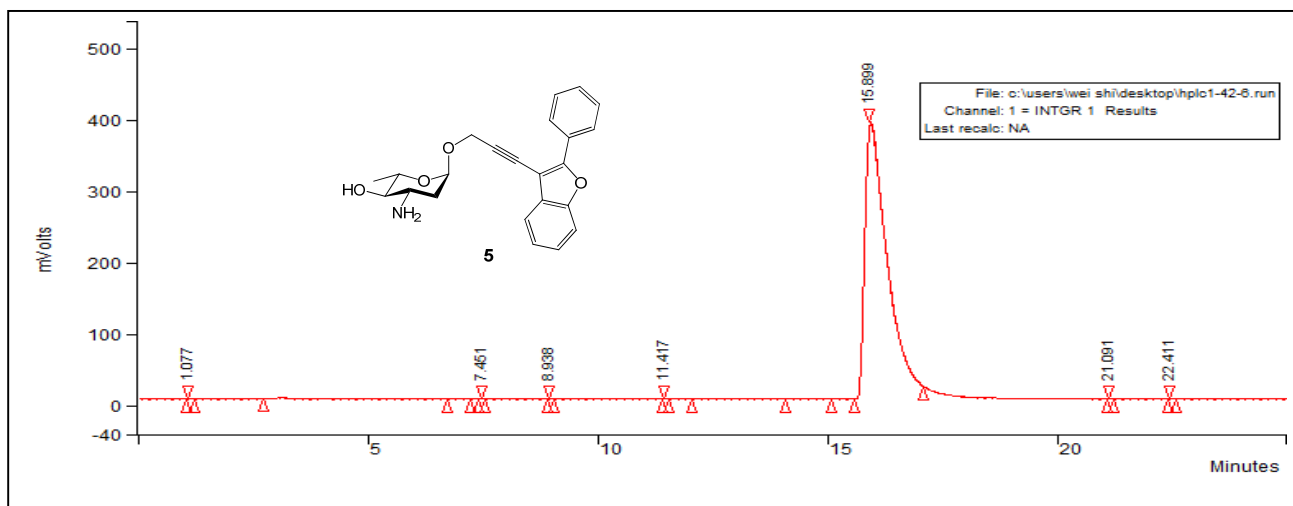

Print Date: Fri Dec 07 19:38:41 2007

Page 1 of 1

Title :  
 Run File : c:\users\wei shi\desktop\hplc1-42-6.run  
 Method File : C:\star\Methods\Wei\Mannose.mth  
 Sample ID : Manual Sample

Injection Date: 2007/12/5 19:35      Calculation Date: 2007/12/5 20:00

Operator : Wei      Detector Type: ProStar/Dynamax (2 Volts)  
 Workstation:      Bus Address : 24  
 Instrument : Instrument #1      Sample Rate : 5.00 Hz  
 Channel : 1 = INTGR 1      Run Time : 24.987 min

\*\* LC Workstation Version 6.30 \*\* 02868-26D0-AE7-0234 \*\*

Run Mode : Analysis  
 Peak Measurement: Peak Area  
 Calculation Type: Percent

| Peak No.            | Peak Name | Result<br>(%) | Ret. Time<br>(min) | Time Offset<br>(min) | Area<br>(counts) | Sep. Code | Width 1/2<br>(sec) | Status Codes |
|---------------------|-----------|---------------|--------------------|----------------------|------------------|-----------|--------------------|--------------|
| 1                   |           | 0.0665        | 1.077              | 0.000                | 8350             | BB        | 3.0                |              |
| 2                   |           | 0.0680        | 7.451              | 0.000                | 8547             | BB        | 7.7                |              |
| 3                   |           | 0.0633        | 8.938              | 0.000                | 7951             | BB        | 0.0                |              |
| 4                   |           | 0.0611        | 11.417             | 0.000                | 7680             | BB        | 3.5                |              |
| 5                   |           | 99.6070       | 15.899             | 0.000                | 12513063         | BB        | 30.1               |              |
| 6                   |           | 0.0673        | 21.091             | 0.000                | 8448             | BB        | 4.3                |              |
| 7                   |           | 0.0669        | 22.411             | 0.000                | 8399             | BB        | 9.2                |              |
| ----- Totals: ----- |           | 100.0001      |                    | 0.000                | 12562438         |           |                    |              |



Sample figure from the FID assays of compound **1** – **4**

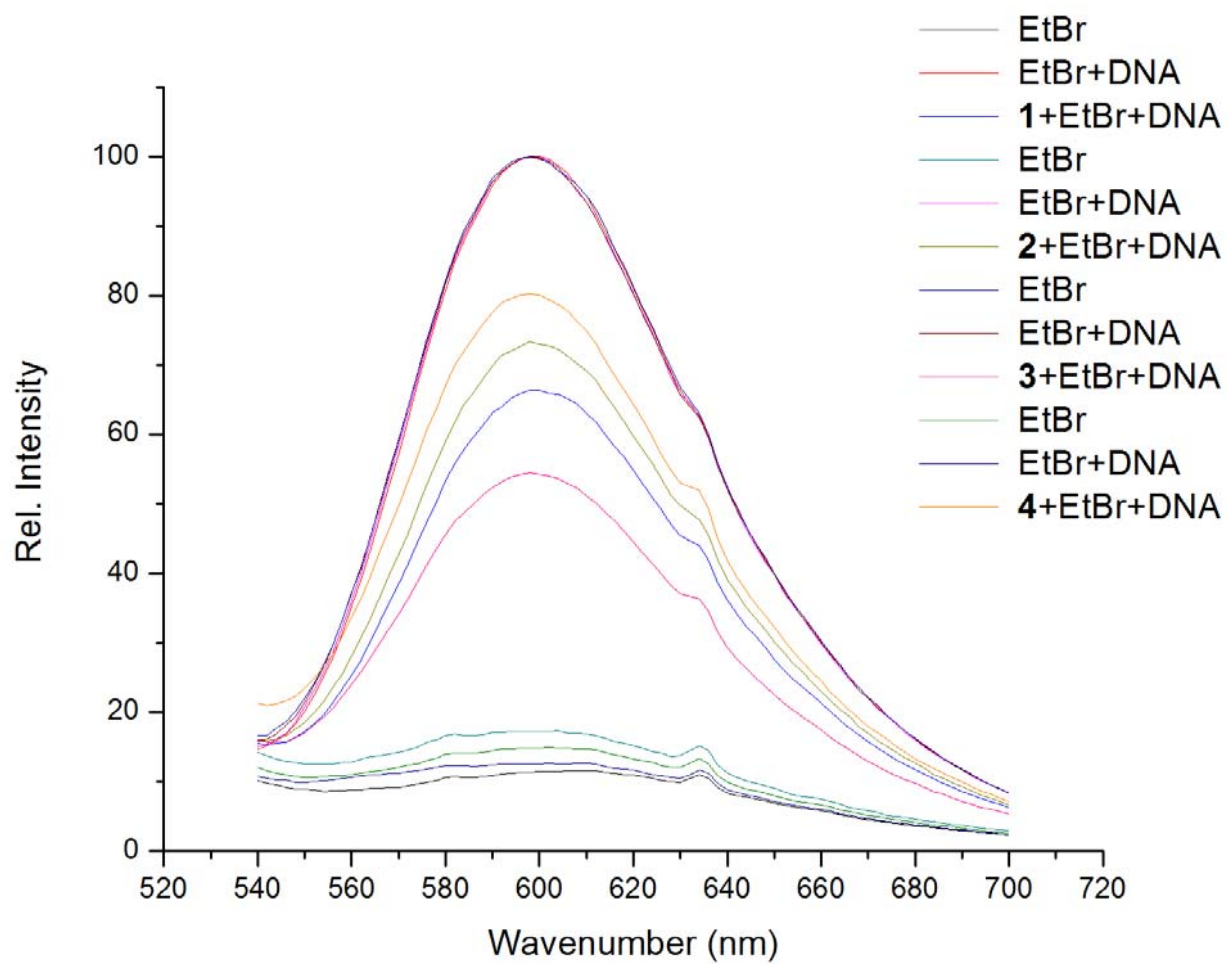

Supplement: b909153j.pdf [file b909153j.pdf]
